# Supplementary material for: Clumped isotope evidence for Early Jurassic extreme polar warmth and high climate sensitivity
Source: Copernicus journal article supplement (doi:10.5194/cp-18-435-2022), 2022-03-04
Supplement: Supplementary file 1 [file cp-18-435-2022-supplement.zip]

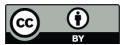

## *Supplement of*

# **Clumped isotope evidence for Early Jurassic extreme polar warmth and high climate sensitivity**

**Thomas Letulle et al.**

*Correspondence to:* Thomas Letulle ([thomas.letulle@univ-lyon1.fr](mailto:thomas.letulle@univ-lyon1.fr))

- [cp-18-435-2022-supplement-title-page.pdf](#)
- [Letulle et al., Supplementary.pdf](#)
- [Supplementary Table S1.xlsx](#)
- [Supplementary Table S2.xlsx](#)
- [Supplementary Table S3.xlsx](#)
- [Supplementary Table S4.xlsx](#)

The copyright of individual parts of the supplement might differ from the article licence.
