# Supplementary material for: Clumped isotope evidence for Early Jurassic extreme polar warmth and high climate sensitivity
Source: Copernicus journal article supplement (doi:10.5194/cp-18-435-2022), 2022-03-04
Supplement: Supplementary file 3 [file cp-18-435-2022-supplement.zip]

Archive with 6 entries (6 files):
- Supplementary Table S3.xlsx
- Supplementary Table S2.xlsx
- cp-18-435-2022-supplement-title-page.pdf
- Supplementary Table S4.xlsx
- Letulle et al., Supplementary.pdf
- Supplementary Table S1.xlsx
