# Supplementary material for: Clumped isotope evidence for Early Jurassic extreme polar warmth and high climate sensitivity
Source: Copernicus journal article supplement (doi:10.5194/cp-18-435-2022), 2022-03-04
Supplement: Supplementary file 3 [file cp-18-435-2022-supplement.zip › Supplementary Table S1.xlsx]

## Sheet: Reference material
ref aragonite				ref calcite
raman shift (cm-1)	Intensity (AU)	AUx30000		raman shift cm-1	Intensity (AU)	AUx30000
53.4321	0.0334572	1003.72		126.035	0.00885591	265.677
54.2838	0.0334572	1003.72		126.88	0.00885591	265.677
55.1354	0.0334572	1003.72		127.725	0.00885591	265.677
55.9869	0.0334572	1003.72		128.569	0.00885591	265.677
56.8383	0.0316147	948.441		129.413	0.00712063	213.619
57.6897	0.0328754	986.262		130.258	0.00777884	233.365
58.5409	0.0315177	945.531		131.102	0.00735998	220.799
59.3921	0.0335542	1006.63		131.946	0.00765917	229.775
60.2432	0.0319379	958.137		132.79	0.00795835	238.75
61.0942	0.0308712	926.136		133.634	0.00730014	219.004
61.9451	0.0295135	885.405		134.478	0.00718047	215.414
62.7959	0.0285114	855.342		135.322	0.00724031	217.209
63.6467	0.0304833	914.499		136.165	0.00741982	222.595
64.4973	0.0302247	906.741		137.009	0.00747966	224.39
65.3479	0.0319379	958.137		137.852	0.00789852	236.956
66.1984	0.0301277	903.831		138.696	0.00741982	222.595
67.0488	0.0274446	823.338		139.539	0.00718047	215.414
67.8991	0.0280588	841.764		140.383	0.00873624	262.087
68.7493	0.02599	779.7		141.226	0.0086764	260.292
69.5995	0.0264425	793.275		142.069	0.00855673	256.702
70.4495	0.0267658	802.974		142.912	0.00837721	251.316
71.2995	0.0256021	768.063		143.755	0.00759933	227.98
72.1494	0.0251495	754.485		144.598	0.00873624	262.087
72.9991	0.0253435	760.305		145.44	0.00849689	254.907
73.8489	0.0254081	762.243		146.283	0.00951412	285.424
74.6985	0.025893	776.79		147.126	0.00927477	278.243
75.548	0.0268305	804.915		147.968	0.0101125	303.375
76.3975	0.0305802	917.406		148.811	0.0101723	305.169
77.2468	0.0299014	897.042		149.653	0.0108904	326.712
78.0961	0.0263456	790.368		150.495	0.0115486	346.458
78.9453	0.0227574	682.722		151.337	0.0119674	359.022
79.7944	0.0220462	661.386		152.179	0.0155577	466.731
80.6434	0.0225311	675.933		153.021	0.017652	529.56
81.4923	0.0233069	699.207		153.863	0.0213619	640.857
82.3412	0.0223048	669.144		154.705	0.0268669	806.007
83.19	0.0229837	689.511		155.547	0.0317736	953.208
84.0386	0.0220139	660.417		156.388	0.0355433	1066.3
84.8872	0.0218523	655.569		157.23	0.0343466	1030.4
85.7357	0.0210118	630.354		158.072	0.03309	992.7
86.5841	0.0207855	623.565		158.913	0.0283629	850.887
87.4325	0.0205592	616.776		159.754	0.0244136	732.408
88.2807	0.0202037	606.111		160.595	0.0192078	576.234
89.1289	0.0210118	630.354		161.437	0.015797	473.91
89.9769	0.0203653	610.959		162.278	0.0134035	402.105
90.8249	0.0210765	632.295		163.119	0.0119076	357.228
91.6728	0.0209148	627.444		163.96	0.0114289	342.867
92.5206	0.0208178	624.534		164.8	0.0102322	306.966
93.3684	0.0204946	614.838		165.641	0.00975347	292.604
94.216	0.020236	607.08		166.482	0.00903542	271.063
95.0636	0.0195248	585.744		167.322	0.00897559	269.268
95.911	0.0199774	599.322		168.163	0.00933461	280.038
96.7584	0.0191046	573.138		169.003	0.007719	231.57
97.6057	0.0193632	580.896		169.843	0.00903542	271.063
98.4529	0.0190076	570.228		170.684	0.0081977	245.931
99.3001	0.018846	565.38		171.524	0.00825754	247.726
100.147	0.0195895	587.685		172.364	0.00873624	262.087
100.994	0.0185227	555.681		173.204	0.007719	231.57
101.841	0.0187813	563.439		174.044	0.00777884	233.365
102.688	0.0192339	577.017		174.883	0.00783868	235.16
103.534	0.018749	562.47		175.723	0.00753949	226.185
104.381	0.0189429	568.287		176.563	0.00789852	236.956
105.228	0.0201067	603.201		177.402	0.00688128	206.438
106.074	0.0188136	564.408		178.242	0.00741982	222.595
106.92	0.0192662	577.986		179.081	0.00730014	219.004
107.767	0.018846	565.38		179.92	0.00753949	226.185
108.613	0.0192662	577.986		180.759	0.00712063	213.619
109.459	0.0183288	549.864		181.598	0.007719	231.57
110.305	0.0190399	571.197		182.438	0.00694112	208.234
111.151	0.0188136	564.408		183.276	0.00753949	226.185
111.997	0.0192339	577.017		184.115	0.00718047	215.414
112.842	0.0188136	564.408		184.954	0.007719	231.57
113.688	0.0196218	588.654		185.793	0.00741982	222.595
114.534	0.0202037	606.111		186.631	0.00694112	208.234
115.379	0.0217876	653.628		187.47	0.00688128	206.438
116.225	0.0220462	661.386		188.308	0.00694112	208.234
117.07	0.0194278	582.834		189.147	0.00700096	210.029
117.915	0.0189106	567.318		189.985	0.00706079	211.824
118.76	0.017456	523.68		190.823	0.00676161	202.848
119.605	0.0175853	527.559		191.661	0.00724031	217.209
120.45	0.0171004	513.012		192.499	0.00700096	210.029
121.295	0.017262	517.86		193.337	0.00688128	206.438
122.14	0.0170357	511.071		194.175	0.00706079	211.824
122.985	0.0175853	527.559		195.013	0.00688128	206.438
123.829	0.0164862	494.586		195.85	0.00700096	210.029
124.674	0.0170034	510.102		196.688	0.00700096	210.029
125.518	0.0168094	504.282		197.525	0.00718047	215.414
126.363	0.0163246	489.738		198.363	0.00724031	217.209
127.207	0.0161629	484.887		199.2	0.00616324	184.897
128.051	0.0164862	494.586		200.037	0.00676161	202.848
128.895	0.0165185	495.555		200.874	0.00676161	202.848
129.74	0.0168418	505.254		201.712	0.00735998	220.799
130.583	0.0161629	484.887		202.548	0.00724031	217.209
131.427	0.0165832	497.496		203.385	0.00664193	199.258
132.271	0.015969	479.07		204.222	0.00724031	217.209
133.115	0.0164862	494.586		205.059	0.00682145	204.643
133.958	0.0166478	499.434		205.896	0.00700096	210.029
134.802	0.0165508	496.524		206.732	0.00694112	208.234
135.645	0.0162276	486.828		207.569	0.00688128	206.438
136.489	0.0164539	493.617		208.405	0.00735998	220.799
137.332	0.0170034	510.102		209.241	0.00682145	204.643
138.175	0.0174883	524.649		210.078	0.00735998	220.799
139.018	0.018846	565.38		210.914	0.00706079	211.824
139.861	0.0200097	600.291		211.75	0.00694112	208.234
140.704	0.0231776	695.328		212.586	0.00670177	201.053
141.547	0.0270567	811.701		213.422	0.00759933	227.98
142.39	0.0328431	985.293		214.257	0.00700096	210.029
143.233	0.0322612	967.836		215.093	0.00670177	201.053
144.075	0.0273477	820.431		215.929	0.00747966	224.39
144.918	0.0235655	706.965		216.764	0.00753949	226.185
145.76	0.0239858	719.574		217.6	0.00670177	201.053
146.602	0.0241151	723.453		218.435	0.00789852	236.956
147.445	0.0261839	785.517		219.27	0.00747966	224.39
148.287	0.0295135	885.405		220.106	0.00747966	224.39
149.129	0.0335866	1007.6		220.941	0.00747966	224.39
149.971	0.0378859	1136.58		221.776	0.00712063	213.619
150.813	0.0457087	1371.26		222.611	0.00753949	226.185
151.655	0.0529821	1589.46		223.446	0.00741982	222.595
152.496	0.0594149	1782.45		224.28	0.00735998	220.799
153.338	0.0612898	1838.69		225.115	0.00747966	224.39
154.179	0.0587361	1762.08		225.95	0.00700096	210.029
155.021	0.0530144	1590.43		226.784	0.00741982	222.595
155.862	0.0440925	1322.78		227.619	0.00795835	238.75
156.704	0.0363989	1091.97		228.453	0.00765917	229.775
157.545	0.0318733	956.199		229.287	0.00753949	226.185
158.386	0.0279619	838.857		230.122	0.007719	231.57
159.227	0.0267335	802.005		230.956	0.00759933	227.98
160.068	0.0252788	758.364		231.79	0.00747966	224.39
160.909	0.0254728	764.184		232.624	0.00813787	244.136
161.75	0.0253111	759.333		233.457	0.00843705	253.112
162.59	0.0242444	727.332		234.291	0.00759933	227.98
163.431	0.0217876	653.628		235.125	0.0081977	245.931
164.272	0.0200097	600.291		235.959	0.007719	231.57
165.112	0.0185227	555.681		236.792	0.00700096	210.029
165.952	0.0174883	524.649		237.625	0.00801819	240.546
166.793	0.0172297	516.891		238.459	0.00783868	235.16
167.633	0.0172297	516.891		239.292	0.00795835	238.75
168.473	0.0166155	498.465		240.125	0.00783868	235.16
169.313	0.0153225	459.675		240.958	0.00831738	249.521
170.153	0.0160983	482.949		241.791	0.00921494	276.448
170.993	0.0172943	518.829		242.624	0.00813787	244.136
171.833	0.0167125	501.375		243.457	0.00849689	254.907
172.672	0.0168741	506.223		244.29	0.00831738	249.521
173.512	0.017165	514.95		245.123	0.00897559	269.268
174.351	0.0187813	563.439		245.955	0.00891575	267.473
175.191	0.0187167	561.501		246.788	0.00927477	278.243
176.03	0.0210765	632.295		247.62	0.00897559	269.268
176.869	0.0231453	694.359		248.452	0.0091551	274.653
177.709	0.027477	824.31		249.285	0.00933461	280.038
178.548	0.0343947	1031.84		250.117	0.0100527	301.581
179.387	0.038985	1169.55		250.949	0.0096338	289.014
180.226	0.043058	1291.74		251.781	0.00903542	271.063
181.064	0.0401164	1203.49		252.613	0.00999282	299.785
181.903	0.0340391	1021.17		253.445	0.0101723	305.169
182.742	0.0271537	814.611		254.276	0.00999282	299.785
183.58	0.0228544	685.632		255.108	0.0107707	323.121
184.419	0.0207855	623.565		255.94	0.0107707	323.121
185.257	0.020236	607.08		256.771	0.0115486	346.458
186.096	0.0186843	560.529		257.603	0.0117281	351.843
186.934	0.0189106	567.318		258.434	0.0122068	366.204
187.772	0.020236	607.08		259.265	0.0122666	367.998
188.61	0.0213351	640.053		260.096	0.0145404	436.212
189.448	0.0230483	691.449		260.927	0.0131642	394.926
190.286	0.0223695	671.085		261.758	0.0140618	421.854
191.124	0.0219816	659.448		262.589	0.0139421	418.263
191.961	0.0227251	681.753		263.42	0.015438	463.14
192.799	0.0204299	612.897		264.251	0.0163356	490.068
193.637	0.0199774	599.322		265.082	0.0162159	486.477
194.474	0.0189753	569.259		265.912	0.0169938	509.814
195.312	0.0186843	560.529		266.743	0.0190282	570.846
196.149	0.0192339	577.017		267.573	0.020225	606.75
196.986	0.0191046	573.138		268.403	0.0216012	648.036
197.823	0.0201713	605.139		269.234	0.0229177	687.531
198.66	0.021529	645.87		270.064	0.023157	694.71
199.497	0.021529	645.87		270.894	0.0260292	780.876
200.334	0.0263456	790.368		271.724	0.0280637	841.911
201.171	0.0286084	858.252		272.554	0.0293801	881.403
202.008	0.0330693	992.079		273.384	0.0317736	953.208
202.844	0.0419589	1258.77		274.213	0.0356032	1068.1
203.681	0.0566026	1698.08		275.043	0.0373384	1120.15
204.517	0.0743171	2229.51		275.872	0.0443394	1330.18
205.354	0.0955229	2865.69		276.702	0.0494854	1484.56
206.19	0.112365	3370.95		277.531	0.0578028	1734.08
207.026	0.11049	3314.7		278.361	0.0667185	2001.56
207.862	0.095135	2854.05		279.19	0.078327	2349.81
208.698	0.0703734	2111.2		280.019	0.0893968	2681.9
209.534	0.0534023	1602.07		280.848	0.102681	3080.43
210.37	0.0408599	1225.8		281.677	0.114947	3448.41
211.206	0.0326491	979.473		282.506	0.126137	3784.11
212.041	0.0288993	866.979		283.335	0.128351	3850.53
212.877	0.0239535	718.605		284.164	0.126975	3809.25
213.713	0.0224988	674.964		284.992	0.111477	3344.31
214.548	0.0213997	641.991		285.821	0.0990905	2972.72
215.383	0.0197511	592.533		286.649	0.0844303	2532.91
216.219	0.0178439	535.317		287.478	0.0721039	2163.12
217.054	0.0180055	540.165		288.306	0.059179	1775.37
217.889	0.0168741	506.223		289.134	0.0516994	1550.98
218.724	0.0161306	483.918		289.962	0.0447583	1342.75
219.559	0.0150315	450.945		290.79	0.0362015	1086.04
220.394	0.0153225	459.675		291.618	0.0332097	996.291
221.228	0.014579	437.37		292.446	0.0283629	850.887
222.063	0.014482	434.46		293.274	0.0247726	743.178
222.898	0.0136092	408.276		294.102	0.0217808	653.424
223.732	0.0138355	415.065		294.929	0.0210627	631.881
224.567	0.0136738	410.214		295.757	0.0193873	581.619
225.401	0.0135122	405.366		296.584	0.0184299	552.897
226.235	0.0137708	413.124		297.412	0.0172331	516.993
227.069	0.0136415	409.245		298.239	0.0151987	455.961
227.903	0.0135122	405.366		299.066	0.0153183	459.549
228.737	0.0132536	397.608		299.893	0.0134035	402.105
229.571	0.0126071	378.213		300.72	0.0135831	407.493
230.405	0.012995	389.85		301.547	0.0133437	400.311
231.239	0.0128657	385.971		302.374	0.0116683	350.049
232.073	0.0125748	377.244		303.201	0.0114888	344.664
232.906	0.0125101	375.303		304.028	0.0108305	324.915
233.74	0.0124455	373.365		304.854	0.0117879	353.637
234.573	0.0124778	374.334		305.681	0.0109502	328.506
235.406	0.0131566	394.698		306.507	0.0100527	301.581
236.24	0.0130273	390.819		307.334	0.00957396	287.219
237.073	0.0130273	390.819		308.16	0.0108904	326.712
237.906	0.0125748	377.244		308.986	0.0104117	312.351
238.739	0.013092	392.76		309.812	0.00951412	285.424
239.572	0.0137062	411.186		310.638	0.00957396	287.219
240.404	0.0146113	438.339		311.464	0.00945428	283.628
241.237	0.014579	437.37		312.29	0.0091551	274.653
242.07	0.0152578	457.734		313.116	0.00927477	278.243
242.902	0.0155164	465.492		313.942	0.00873624	262.087
243.735	0.0167448	502.344		314.767	0.00861656	258.497
244.567	0.0171004	513.012		315.593	0.00879607	263.882
245.4	0.0193309	579.927		316.418	0.00861656	258.497
246.232	0.0199127	597.381		317.244	0.00891575	267.473
247.064	0.0196864	590.592		318.069	0.00933461	280.038
247.896	0.020236	607.08		318.894	0.00873624	262.087
248.728	0.0196218	588.654		319.719	0.00837721	251.316
249.56	0.0201067	603.201		320.545	0.00759933	227.98
250.392	0.0184581	553.743		321.369	0.00825754	247.726
251.223	0.0187813	563.439		322.194	0.0086764	260.292
252.055	0.0177469	532.407		323.019	0.00759933	227.98
252.886	0.017262	517.86		323.844	0.00826741	248.022
253.718	0.0168094	504.282		324.668	0.00907282	272.185
254.549	0.0165185	495.555		325.493	0.00885591	265.677
255.381	0.015678	470.34		326.317	0.00825754	247.726
256.212	0.0163246	489.738		327.142	0.00777884	233.365
257.043	0.0164215	492.645		327.966	0.00837721	251.316
257.874	0.0180701	542.103		328.79	0.00759933	227.98
258.705	0.0179732	539.196		329.614	0.00765917	229.775
259.536	0.0184581	553.743		330.439	0.00712063	213.619
260.367	0.0189106	567.318		331.262	0.00735998	220.799
261.197	0.0194925	584.775		332.086	0.00753949	226.185
262.028	0.0194925	584.775		332.91	0.00795835	238.75
262.858	0.0175529	526.587		333.734	0.00753949	226.185
263.689	0.0168741	506.223		334.557	0.00700096	210.029
264.519	0.0154194	462.582		335.381	0.00747966	224.39
265.349	0.015872	476.16		336.204	0.00730014	219.004
266.18	0.0149669	449.007		337.028	0.00706079	211.824
267.01	0.0151931	455.793		337.851	0.0065821	197.463
267.84	0.0146759	440.277		338.674	0.00694112	208.234
268.67	0.0152901	458.703		339.497	0.00753949	226.185
269.5	0.0149345	448.035		340.32	0.00694112	208.234
270.329	0.0150962	452.886		341.143	0.007719	231.57
271.159	0.0163892	491.676		341.966	0.00741982	222.595
271.989	0.0158397	475.191		342.789	0.0081977	245.931
272.818	0.0162276	486.828		343.612	0.00741982	222.595
273.648	0.0152578	457.734		344.434	0.00735998	220.799
274.477	0.015775	473.25		345.257	0.00741982	222.595
275.306	0.0146759	440.277		346.079	0.00724031	217.209
276.135	0.0139971	419.913		346.902	0.00700096	210.029
276.964	0.0146759	440.277		347.724	0.00706079	211.824
277.793	0.0138031	414.093		348.546	0.00706079	211.824
278.622	0.0138031	414.093		349.368	0.00741982	222.595
279.451	0.0136738	410.214		350.19	0.00688128	206.438
280.28	0.0134152	402.456		351.012	0.00789852	236.956
281.109	0.0132536	397.608		351.834	0.00741982	222.595
281.937	0.012898	386.94		352.656	0.00670177	201.053
282.766	0.0129627	388.881		353.478	0.00735998	220.799
283.594	0.0127687	383.061		354.299	0.00735998	220.799
284.423	0.0126071	378.213		355.121	0.00747966	224.39
285.251	0.0132536	397.608		355.942	0.00741982	222.595
286.079	0.0128334	385.002		356.764	0.00712063	213.619
286.907	0.012898	386.94		357.585	0.00670177	201.053
287.735	0.0123808	371.424		358.406	0.00724031	217.209
288.563	0.0122192	366.576		359.227	0.00783868	235.16
289.391	0.0118636	355.908		360.048	0.0065821	197.463
290.219	0.0128334	385.002		360.869	0.00682145	204.643
291.046	0.0119282	357.846		361.69	0.00747966	224.39
291.874	0.0122192	366.576		362.511	0.00724031	217.209
292.701	0.0126717	380.151		363.332	0.00718047	215.414
293.529	0.011605	348.15		364.152	0.00688128	206.438
294.356	0.0116373	349.119		364.973	0.00700096	210.029
295.183	0.0119929	359.787		365.793	0.00694112	208.234
296.01	0.0115727	347.181		366.614	0.00747966	224.39
296.838	0.0123808	371.424		367.434	0.00664193	199.258
297.665	0.0118313	354.939		368.254	0.00676161	202.848
298.491	0.011605	348.15		369.074	0.00676161	202.848
299.318	0.0117666	352.998		369.894	0.00759933	227.98
300.145	0.0118313	354.939		370.714	0.00694112	208.234
300.972	0.0115403	346.209		371.534	0.00735998	220.799
301.798	0.0113787	341.361		372.354	0.00676161	202.848
302.625	0.0119282	357.846		373.174	0.00688128	206.438
303.451	0.0117343	352.029		373.993	0.00712063	213.619
304.277	0.0112494	337.482		374.813	0.00640258	192.077
305.104	0.0114433	343.299		375.632	0.00724031	217.209
305.93	0.00785518	235.655		376.452	0.00424844	127.453
306.756	0.0113787	341.361		377.271	0.00694112	208.234
307.582	0.0114433	343.299		378.09	0.00753949	226.185
308.408	0.0114757	344.271		378.909	0.00753949	226.185
309.234	0.011411	342.33		379.729	0.00712063	213.619
310.059	0.0117343	352.029		380.547	0.00753949	226.185
310.885	0.011508	345.24		381.366	0.00676161	202.848
311.711	0.011702	351.06		382.185	0.00718047	215.414
312.536	0.0112817	338.451		383.004	0.00747966	224.39
313.361	0.0117666	352.998		383.823	0.00688128	206.438
314.187	0.0110554	331.662		384.641	0.00694112	208.234
315.012	0.0116373	349.119		385.46	0.00676161	202.848
315.837	0.0120252	360.756		386.278	0.00706079	211.824
316.662	0.0118313	354.939		387.096	0.00706079	211.824
317.487	0.0117666	352.998		387.914	0.00712063	213.619
318.312	0.0118313	354.939		388.733	0.00706079	211.824
319.137	0.0113787	341.361		389.551	0.00682145	204.643
319.962	0.0118636	355.908		390.369	0.00700096	210.029
320.786	0.0117666	352.998		391.186	0.00682145	204.643
321.611	0.0114433	343.299		392.004	0.00759933	227.98
322.435	0.0117343	352.029		392.822	0.00712063	213.619
323.26	0.0114757	344.271		393.64	0.00706079	211.824
324.084	0.0118313	354.939		394.457	0.00694112	208.234
324.908	0.011702	351.06		395.275	0.00604356	181.307
325.732	0.011508	345.24		396.092	0.00670177	201.053
326.556	0.0115403	346.209		396.909	0.00706079	211.824
327.38	0.0113464	340.392		397.727	0.00676161	202.848
328.204	0.0115727	347.181		398.544	0.00730014	219.004
329.028	0.0116696	350.088		399.361	0.00688128	206.438
329.852	0.011605	348.15		400.178	0.00688128	206.438
330.675	0.0115403	346.209		400.995	0.00741982	222.595
331.499	0.0114433	343.299		401.811	0.00706079	211.824
332.322	0.0112171	336.513		402.628	0.00694112	208.234
333.146	0.0119929	359.787		403.445	0.00724031	217.209
333.969	0.0111201	333.603		404.261	0.00688128	206.438
334.792	0.0117666	352.998		405.078	0.00724031	217.209
335.616	0.0110878	332.634		405.894	0.00634275	190.282
336.439	0.0111201	333.603		406.711	0.00724031	217.209
337.262	0.0117989	353.967		407.527	0.00694112	208.234
338.084	0.011605	348.15		408.343	0.00676161	202.848
338.907	0.0119606	358.818		409.159	0.00628291	188.487
339.73	0.0112817	338.451		409.975	0.00735998	220.799
340.553	0.0112817	338.451		410.791	0.00682145	204.643
341.375	0.0113464	340.392		411.607	0.00741982	222.595
342.198	0.0112171	336.513		412.422	0.00694112	208.234
343.02	0.0115727	347.181		413.238	0.00694112	208.234
343.842	0.011411	342.33		414.054	0.00664193	199.258
344.664	0.0108938	326.814		414.869	0.00730014	219.004
345.487	0.0110554	331.662		415.685	0.00700096	210.029
346.309	0.0111524	334.572		416.5	0.00694112	208.234
347.131	0.0109585	328.755		417.315	0.00694112	208.234
347.953	0.011314	339.42		418.13	0.00688128	206.438
348.774	0.0111847	335.541		418.945	0.00676161	202.848
349.596	0.0111201	333.603		419.76	0.00676161	202.848
350.418	0.0110231	330.693		420.575	0.00712063	213.619
351.239	0.0118313	354.939		421.39	0.00706079	211.824
352.061	0.0113787	341.361		422.205	0.0065821	197.463
352.882	0.0111847	335.541		423.019	0.00646242	193.873
353.703	0.0122192	366.576		423.834	0.00765917	229.775
354.525	0.0114433	343.299		424.649	0.00712063	213.619
355.346	0.011314	339.42		425.463	0.00694112	208.234
356.167	0.0110554	331.662		426.277	0.00688128	206.438
356.988	0.0108938	326.814		427.092	0.0065821	197.463
357.809	0.0109585	328.755		427.906	0.00724031	217.209
358.629	0.0114433	343.299		428.72	0.00694112	208.234
359.45	0.0117343	352.029		429.534	0.00706079	211.824
360.271	0.011702	351.06		430.348	0.00747966	224.39
361.091	0.0113464	340.392		431.162	0.00676161	202.848
361.912	0.0119606	358.818		431.975	0.00694112	208.234
362.732	0.0108615	325.845		432.789	0.00700096	210.029
363.552	0.0112817	338.451		433.603	0.00688128	206.438
364.373	0.011605	348.15		434.416	0.00676161	202.848
365.193	0.0114433	343.299		435.229	0.0065821	197.463
366.013	0.011508	345.24		436.043	0.00706079	211.824
366.833	0.0115403	346.209		436.856	0.00747966	224.39
367.653	0.0110878	332.634		437.669	0.00664193	199.258
368.472	0.0113787	341.361		438.482	0.00718047	215.414
369.292	0.0112171	336.513		439.295	0.00694112	208.234
370.112	0.011605	348.15		440.108	0.00694112	208.234
370.931	0.0115727	347.181		440.921	0.00706079	211.824
371.751	0.0115727	347.181		441.734	0.00712063	213.619
372.57	0.011411	342.33		442.547	0.00741982	222.595
373.389	0.0115727	347.181		443.359	0.00765917	229.775
374.209	0.0117666	352.998		444.172	0.00735998	220.799
375.028	0.0113787	341.361		444.984	0.00676161	202.848
375.847	0.0119606	358.818		445.796	0.00730014	219.004
376.666	0.0111524	334.572		446.609	0.00724031	217.209
377.485	0.0113787	341.361		447.421	0.00753949	226.185
378.303	0.0112171	336.513		448.233	0.00640258	192.077
379.122	0.0119282	357.846		449.045	0.00676161	202.848
379.941	0.0116696	350.088		449.857	0.00747966	224.39
380.759	0.0112494	337.482		450.669	0.00694112	208.234
381.578	0.0111201	333.603		451.481	0.00724031	217.209
382.396	0.0116696	350.088		452.292	0.00706079	211.824
383.215	0.0119929	359.787		453.104	0.00700096	210.029
384.033	0.0117989	353.967		453.915	0.00664193	199.258
384.851	0.0114433	343.299		454.727	0.00700096	210.029
385.669	0.0109908	329.724		455.538	0.00706079	211.824
386.487	0.0109908	329.724		456.35	0.00741982	222.595
387.305	0.0116696	350.088		457.161	0.00664193	199.258
388.123	0.0119929	359.787		457.972	0.00718047	215.414
388.94	0.0115727	347.181		458.783	0.00747966	224.39
389.758	0.0112494	337.482		459.594	0.00694112	208.234
390.575	0.0110554	331.662		460.405	0.00759933	227.98
391.393	0.0110554	331.662		461.215	0.00706079	211.824
392.21	0.0116696	350.088		462.026	0.00694112	208.234
393.028	0.0110231	330.693		462.837	0.00712063	213.619
393.845	0.0120252	360.756		463.647	0.00676161	202.848
394.662	0.0110554	331.662		464.458	0.00688128	206.438
395.479	0.0118313	354.939		465.268	0.00753949	226.185
396.296	0.0116696	350.088		466.078	0.00724031	217.209
397.113	0.0112494	337.482		466.889	0.00688128	206.438
397.93	0.0113787	341.361		467.699	0.00747966	224.39
398.746	0.0112171	336.513		468.509	0.00712063	213.619
399.563	0.0118313	354.939		469.319	0.00706079	211.824
400.38	0.0110554	331.662		470.129	0.00759933	227.98
401.196	0.0114757	344.271		470.939	0.00724031	217.209
402.012	0.011508	345.24		471.748	0.00741982	222.595
402.829	0.0118959	356.877		472.558	0.00724031	217.209
403.645	0.0113464	340.392		473.367	0.00694112	208.234
404.461	0.0108615	325.845		474.177	0.00724031	217.209
405.277	0.011411	342.33		474.986	0.00712063	213.619
406.093	0.0116696	350.088		475.796	0.00724031	217.209
406.909	0.0114757	344.271		476.605	0.00688128	206.438
407.725	0.0113464	340.392		477.414	0.00718047	215.414
408.541	0.0114433	343.299		478.223	0.00694112	208.234
409.356	0.0117343	352.029		479.032	0.00706079	211.824
410.172	0.0107968	323.904		479.841	0.00718047	215.414
410.987	0.0114433	343.299		480.65	0.00735998	220.799
411.803	0.0117343	352.029		481.458	0.00735998	220.799
412.618	0.011702	351.06		482.267	0.00741982	222.595
413.433	0.0120252	360.756		483.076	0.00700096	210.029
414.248	0.0119282	357.846		483.884	0.00688128	206.438
415.063	0.0112171	336.513		484.693	0.00688128	206.438
415.878	0.011411	342.33		485.501	0.00718047	215.414
416.693	0.0113464	340.392		486.309	0.00718047	215.414
417.508	0.0116696	350.088		487.117	0.00724031	217.209
418.323	0.0117989	353.967		487.925	0.00688128	206.438
419.137	0.0110878	332.634		488.733	0.00694112	208.234
419.952	0.011508	345.24		489.541	0.00735998	220.799
420.766	0.0116696	350.088		490.349	0.00676161	202.848
421.581	0.011702	351.06		491.157	0.00694112	208.234
422.395	0.011702	351.06		491.965	0.00706079	211.824
423.209	0.0117666	352.998		492.772	0.00735998	220.799
424.023	0.0117343	352.029		493.58	0.00706079	211.824
424.838	0.011411	342.33		494.387	0.00682145	204.643
425.652	0.0117666	352.998		495.194	0.00718047	215.414
426.465	0.0120252	360.756		496.002	0.00712063	213.619
427.279	0.0117666	352.998		496.809	0.00700096	210.029
428.093	0.0117989	353.967		497.616	0.00694112	208.234
428.907	0.0113464	340.392		498.423	0.00670177	201.053
429.72	0.0116696	350.088		499.23	0.00724031	217.209
430.534	0.0113787	341.361		500.037	0.00694112	208.234
431.347	0.0117343	352.029		500.843	0.00706079	211.824
432.16	0.0121545	364.635		501.65	0.00682145	204.643
432.974	0.0118313	354.939		502.457	0.00741982	222.595
433.787	0.0109261	327.783		503.263	0.00718047	215.414
434.6	0.0117666	352.998		504.07	0.00759933	227.98
435.413	0.011702	351.06		504.876	0.00753949	226.185
436.226	0.011411	342.33		505.682	0.00753949	226.185
437.039	0.011314	339.42		506.489	0.00712063	213.619
437.851	0.0118959	356.877		507.295	0.00724031	217.209
438.664	0.0118636	355.908		508.101	0.00688128	206.438
439.477	0.011605	348.15		508.907	0.00682145	204.643
440.289	0.0115727	347.181		509.713	0.00706079	211.824
441.101	0.0120252	360.756		510.518	0.00730014	219.004
441.914	0.0116696	350.088		511.324	0.00718047	215.414
442.726	0.0118636	355.908		512.13	0.00688128	206.438
443.538	0.011605	348.15		512.935	0.00753949	226.185
444.35	0.0119929	359.787		513.741	0.00688128	206.438
445.162	0.011508	345.24		514.546	0.00759933	227.98
445.974	0.0120575	361.725		515.351	0.00682145	204.643
446.786	0.0116696	350.088		516.157	0.00741982	222.595
447.598	0.0112494	337.482		516.962	0.00759933	227.98
448.409	0.0118636	355.908		517.767	0.00759933	227.98
449.221	0.011702	351.06		518.572	0.00718047	215.414
450.032	0.0117989	353.967		519.377	0.007719	231.57
450.844	0.011702	351.06		520.181	0.007719	231.57
451.655	0.011702	351.06		520.986	0.00789852	236.956
452.466	0.0118313	354.939		521.791	0.00807803	242.341
453.278	0.0113787	341.361		522.595	0.00759933	227.98
454.089	0.0118636	355.908		523.4	0.00741982	222.595
454.9	0.0115403	346.209		524.204	0.00712063	213.619
455.711	0.011605	348.15		525.008	0.007719	231.57
456.522	0.0120899	362.697		525.813	0.00718047	215.414
457.332	0.0115403	346.209		526.617	0.00747966	224.39
458.143	0.0116373	349.119		527.421	0.00724031	217.209
458.954	0.0120252	360.756		528.225	0.00747966	224.39
459.764	0.011605	348.15		529.029	0.00759933	227.98
460.574	0.011605	348.15		529.833	0.007719	231.57
461.385	0.0122192	366.576		530.636	0.00789852	236.956
462.195	0.0116696	350.088		531.44	0.00735998	220.799
463.005	0.0122192	366.576		532.244	0.00706079	211.824
463.815	0.011605	348.15		533.047	0.00753949	226.185
464.625	0.0117666	352.998		533.851	0.00741982	222.595
465.435	0.0116373	349.119		534.654	0.00724031	217.209
466.245	0.0113787	341.361		535.457	0.00724031	217.209
467.055	0.0120252	360.756		536.26	0.00735998	220.799
467.865	0.011605	348.15		537.063	0.00730014	219.004
468.674	0.0117666	352.998		537.866	0.00735998	220.799
469.484	0.0118313	354.939		538.669	0.00747966	224.39
470.293	0.0118313	354.939		539.472	0.00753949	226.185
471.103	0.0117343	352.029		540.275	0.00747966	224.39
471.912	0.0114757	344.271		541.078	0.00718047	215.414
472.721	0.0119606	358.818		541.88	0.00688128	206.438
473.53	0.011702	351.06		542.683	0.007719	231.57
474.339	0.0117666	352.998		543.485	0.00712063	213.619
475.148	0.0114433	343.299		544.288	0.00730014	219.004
475.957	0.0121545	364.635		545.09	0.00741982	222.595
476.766	0.0119282	357.846		545.892	0.00688128	206.438
477.574	0.0121868	365.604		546.694	0.00765917	229.775
478.383	0.011508	345.24		547.496	0.00801819	240.546
479.192	0.0117989	353.967		548.298	0.00759933	227.98
480	0.011411	342.33		549.1	0.00694112	208.234
480.808	0.0115403	346.209		549.902	0.007719	231.57
481.617	0.0113464	340.392		550.704	0.00712063	213.619
482.425	0.0120252	360.756		551.505	0.00783868	235.16
483.233	0.0119929	359.787		552.307	0.00688128	206.438
484.041	0.0120252	360.756		553.108	0.00735998	220.799
484.849	0.0119282	357.846		553.91	0.00765917	229.775
485.657	0.0119606	358.818		554.711	0.00706079	211.824
486.465	0.0116696	350.088		555.512	0.00807803	242.341
487.272	0.0117666	352.998		556.313	0.00718047	215.414
488.08	0.0117343	352.029		557.114	0.00741982	222.595
488.888	0.011605	348.15		557.915	0.00741982	222.595
489.695	0.011508	345.24		558.716	0.00753949	226.185
490.502	0.0118313	354.939		559.517	0.0065821	197.463
491.31	0.0121868	365.604		560.318	0.00765917	229.775
492.117	0.011508	345.24		561.118	0.00753949	226.185
492.924	0.0115403	346.209		561.919	0.00741982	222.595
493.731	0.0117343	352.029		562.719	0.00724031	217.209
494.538	0.0116373	349.119		563.52	0.00759933	227.98
495.345	0.0120575	361.725		564.32	0.00730014	219.004
496.152	0.011314	339.42		565.12	0.00801819	240.546
496.958	0.0119282	357.846		565.92	0.00789852	236.956
497.765	0.0117666	352.998		566.721	0.00700096	210.029
498.572	0.0118636	355.908		567.521	0.00735998	220.799
499.378	0.0113464	340.392		568.32	0.00759933	227.98
500.185	0.0121545	364.635		569.12	0.00825754	247.726
500.991	0.0119282	357.846		569.92	0.00700096	210.029
501.797	0.0114757	344.271		570.72	0.00777884	233.365
502.603	0.0120252	360.756		571.519	0.00706079	211.824
503.409	0.011508	345.24		572.319	0.00783868	235.16
504.215	0.0120575	361.725		573.118	0.00783868	235.16
505.021	0.011314	339.42		573.918	0.00741982	222.595
505.827	0.0119929	359.787		574.717	0.00759933	227.98
506.633	0.0120899	362.697		575.516	0.00712063	213.619
507.438	0.0120252	360.756		576.315	0.00789852	236.956
508.244	0.0123808	371.424		577.114	0.00813787	244.136
509.049	0.0119929	359.787		577.913	0.007719	231.57
509.855	0.0120899	362.697		578.712	0.00759933	227.98
510.66	0.0122192	366.576		579.511	0.00765917	229.775
511.465	0.0120252	360.756		580.31	0.007719	231.57
512.271	0.0124131	372.393		581.108	0.00759933	227.98
513.076	0.0117666	352.998		581.907	0.00747966	224.39
513.881	0.0122515	367.545		582.705	0.00759933	227.98
514.686	0.0117666	352.998		583.504	0.00807803	242.341
515.49	0.0121222	363.666		584.302	0.00759933	227.98
516.295	0.0119282	357.846		585.1	0.00807803	242.341
517.1	0.0122192	366.576		585.898	0.00741982	222.595
517.904	0.0118636	355.908		586.696	0.00795835	238.75
518.709	0.0119929	359.787		587.494	0.00753949	226.185
519.513	0.0122838	368.514		588.292	0.00753949	226.185
520.318	0.0121868	365.604		589.09	0.00747966	224.39
521.122	0.0118636	355.908		589.888	0.00765917	229.775
521.926	0.0119929	359.787		590.685	0.00789852	236.956
522.73	0.0122838	368.514		591.483	0.00801819	240.546
523.534	0.0120575	361.725		592.28	0.00741982	222.595
524.338	0.0118313	354.939		593.078	0.00759933	227.98
525.142	0.0119929	359.787		593.875	0.00735998	220.799
525.946	0.0122192	366.576		594.672	0.00879607	263.882
526.75	0.0119606	358.818		595.469	0.00724031	217.209
527.553	0.0118313	354.939		596.267	0.00741982	222.595
528.357	0.0121222	363.666		597.064	0.007719	231.57
529.16	0.0120252	360.756		597.86	0.00843705	253.112
529.964	0.0121545	364.635		598.657	0.00694112	208.234
530.767	0.0122515	367.545		599.454	0.00783868	235.16
531.57	0.0120575	361.725		600.251	0.00759933	227.98
532.373	0.0121868	365.604		601.047	0.007719	231.57
533.176	0.0121222	363.666		601.844	0.007719	231.57
533.979	0.0119929	359.787		602.64	0.00777884	233.365
534.782	0.0121868	365.604		603.437	0.00718047	215.414
535.585	0.0124131	372.393		604.233	0.00855673	256.702
536.387	0.0125101	375.303		605.029	0.00837721	251.316
537.19	0.0118959	356.877		605.825	0.00801819	240.546
537.993	0.0121868	365.604		606.621	0.00795835	238.75
538.795	0.0118959	356.877		607.417	0.00777884	233.365
539.597	0.0126717	380.151		608.213	0.00783868	235.16
540.4	0.0125424	376.272		609.009	0.00783868	235.16
541.202	0.0123485	370.455		609.805	0.00718047	215.414
542.004	0.0122838	368.514		610.6	0.00801819	240.546
542.806	0.0124131	372.393		611.396	0.00789852	236.956
543.608	0.0123485	370.455		612.191	0.00801819	240.546
544.41	0.0124778	374.334		612.987	0.00765917	229.775
545.212	0.0123808	371.424		613.782	0.00777884	233.365
546.014	0.0124455	373.365		614.577	0.00831738	249.521
546.815	0.0126394	379.182		615.372	0.00813787	244.136
547.617	0.0125748	377.244		616.167	0.00837721	251.316
548.418	0.0119929	359.787		616.962	0.00837721	251.316
549.22	0.0122515	367.545		617.757	0.00789852	236.956
550.021	0.0115403	346.209		618.552	0.0086764	260.292
550.822	0.0117343	352.029		619.347	0.00741982	222.595
551.623	0.0117989	353.967		619.827	0.00795835	238.75
552.424	0.0122838	368.514		620.625	0.00861656	258.497
553.225	0.0122515	367.545		621.422	0.00897559	269.268
554.026	0.0123161	369.483		622.22	0.0081977	245.931
554.827	0.0125424	376.272		623.018	0.00813787	244.136
555.628	0.0117989	353.967		623.815	0.00873624	262.087
556.429	0.011411	342.33		624.612	0.0081977	245.931
557.229	0.0117989	353.967		625.41	0.00885591	265.677
558.03	0.0120252	360.756		626.207	0.00873624	262.087
558.83	0.0124455	373.365		627.004	0.00831738	249.521
559.63	0.0116696	350.088		627.801	0.00861656	258.497
560.431	0.011702	351.06		628.598	0.00897559	269.268
561.231	0.0123161	369.483		629.395	0.00873624	262.087
562.031	0.0122192	366.576		630.192	0.00873624	262.087
562.831	0.0121545	364.635		630.988	0.00849689	254.907
563.631	0.0119282	357.846		631.785	0.00807803	242.341
564.431	0.0124131	372.393		632.582	0.0091551	274.653
565.231	0.0121868	365.604		633.378	0.00849689	254.907
566.03	0.0124455	373.365		634.174	0.00879607	263.882
566.83	0.0120575	361.725		634.971	0.00855673	256.702
567.629	0.0124455	373.365		635.767	0.0086764	260.292
568.429	0.0125748	377.244		636.563	0.00903542	271.063
569.228	0.0126071	378.213		637.359	0.00921494	276.448
570.028	0.0118636	355.908		638.155	0.00873624	262.087
570.827	0.0122838	368.514		638.951	0.00873624	262.087
571.626	0.0121222	363.666		639.747	0.0086764	260.292
572.425	0.0117343	352.029		640.543	0.00927477	278.243
573.224	0.0125748	377.244		641.339	0.00837721	251.316
574.023	0.0120252	360.756		642.134	0.00831738	249.521
574.821	0.0122515	367.545		642.93	0.00927477	278.243
575.62	0.0124778	374.334		643.725	0.00855673	256.702
576.419	0.0119282	357.846		644.521	0.00861656	258.497
577.217	0.0120899	362.697		645.316	0.00813787	244.136
578.016	0.0126394	379.182		646.111	0.00945428	283.628
578.814	0.0122515	367.545		646.906	0.00825754	247.726
579.613	0.0118636	355.908		647.701	0.00969363	290.809
580.411	0.0119282	357.846		648.496	0.00909526	272.858
581.209	0.0123161	369.483		649.291	0.00885591	265.677
582.007	0.0119606	358.818		650.086	0.00849689	254.907
582.805	0.0123485	370.455		650.881	0.00843705	253.112
583.603	0.0122515	367.545		651.675	0.00885591	265.677
584.401	0.0121868	365.604		652.47	0.00885591	265.677
585.198	0.0127041	381.123		653.264	0.00927477	278.243
585.996	0.0123808	371.424		654.059	0.00837721	251.316
586.794	0.0126071	378.213		654.853	0.00897559	269.268
587.591	0.0122838	368.514		655.648	0.00933461	280.038
588.388	0.0123161	369.483		656.442	0.00855673	256.702
589.186	0.0124778	374.334		657.236	0.00831738	249.521
589.983	0.0123808	371.424		658.03	0.00897559	269.268
590.78	0.0121222	363.666		658.824	0.00849689	254.907
591.577	0.0120899	362.697		659.618	0.0091551	274.653
592.374	0.0118313	354.939		660.412	0.0091551	274.653
593.171	0.0127041	381.123		661.205	0.00903542	271.063
593.968	0.0121868	365.604		661.999	0.00903542	271.063
594.765	0.0123485	370.455		662.792	0.00897559	269.268
595.562	0.0104089	312.267		663.586	0.00927477	278.243
596.358	0.0126394	379.182		664.379	0.00861656	258.497
597.155	0.0123161	369.483		665.173	0.00885591	265.677
597.951	0.0119282	357.846		665.966	0.00885591	265.677
598.747	0.0124455	373.365		666.759	0.00837721	251.316
599.544	0.0126717	380.151		667.552	0.00957396	287.219
600.34	0.0125748	377.244		668.345	0.00885591	265.677
601.136	0.0124778	374.334		669.138	0.00939445	281.834
601.932	0.0124778	374.334		669.931	0.00849689	254.907
602.728	0.0123485	370.455		670.724	0.00879607	263.882
603.524	0.0125748	377.244		671.517	0.00927477	278.243
604.32	0.0124131	372.393		672.309	0.00843705	253.112
605.555	0.0124455	373.365		673.102	0.00861656	258.497
606.354	0.0125748	377.244		673.894	0.0091551	274.653
607.153	0.0119929	359.787		674.686	0.00903542	271.063
607.952	0.0121868	365.604		675.479	0.00855673	256.702
608.751	0.0123485	370.455		676.271	0.00921494	276.448
609.55	0.0114433	343.299		677.063	0.00897559	269.268
610.349	0.0122192	366.576		677.855	0.00873624	262.087
611.148	0.0123161	369.483		678.647	0.00951412	285.424
611.947	0.0122838	368.514		679.439	0.00933461	280.038
612.745	0.0125748	377.244		680.231	0.00903542	271.063
613.544	0.0121868	365.604		681.023	0.00891575	267.473
614.342	0.0118313	354.939		681.814	0.00891575	267.473
615.141	0.0122192	366.576		682.606	0.00903542	271.063
615.939	0.0121545	364.635		683.398	0.0096338	289.014
616.737	0.0118636	355.908		684.189	0.00927477	278.243
617.535	0.0119929	359.787		684.98	0.00885591	265.677
618.333	0.0126394	379.182		685.772	0.00933461	280.038
619.131	0.0125424	376.272		686.563	0.00981331	294.399
619.929	0.0123808	371.424		687.354	0.0096338	289.014
620.727	0.0125424	376.272		688.145	0.00885591	265.677
621.525	0.0123485	370.455		688.936	0.00921494	276.448
622.322	0.0128657	385.971		689.727	0.00879607	263.882
623.12	0.0124455	373.365		690.518	0.00885591	265.677
623.918	0.0118959	356.877		691.308	0.00939445	281.834
624.715	0.0123808	371.424		692.099	0.00975347	292.604
625.512	0.0125101	375.303		692.89	0.00939445	281.834
626.31	0.0119282	357.846		693.68	0.00981331	294.399
627.107	0.0124455	373.365		694.471	0.00921494	276.448
627.904	0.0122515	367.545		695.261	0.00933461	280.038
628.701	0.0120899	362.697		696.051	0.00987315	296.195
629.498	0.0127687	383.061		696.841	0.00987315	296.195
630.295	0.0121545	364.635		697.631	0.00969363	290.809
631.092	0.0127041	381.123		698.422	0.00957396	287.219
631.888	0.0129627	388.881		699.212	0.00933461	280.038
632.685	0.0127364	382.092		700.001	0.00975347	292.604
633.482	0.0123485	370.455		700.791	0.0101723	305.169
634.278	0.0128334	385.002		701.581	0.0105912	317.736
635.074	0.0127364	382.092		702.371	0.00969363	290.809
635.871	0.012898	386.94		703.16	0.010292	308.76
636.667	0.0130273	390.819		703.95	0.0100527	301.581
637.463	0.0119282	357.846		704.739	0.010292	308.76
638.259	0.0134476	403.428		705.528	0.0111896	335.688
639.055	0.0126394	379.182		706.318	0.0117281	351.843
639.851	0.0127687	383.061		707.107	0.0128052	384.156
640.647	0.0122515	367.545		707.896	0.0134634	403.902
641.443	0.0124778	374.334		708.685	0.0138224	414.672
642.239	0.0127364	382.092		709.474	0.0177118	531.354
643.034	0.0123161	369.483		710.263	0.0216012	648.036
643.83	0.0123808	371.424		711.051	0.0292604	877.812
644.625	0.0121545	364.635		711.84	0.0432623	1297.87
645.421	0.0126717	380.151		712.629	0.0639062	1917.19
646.216	0.0127041	381.123		713.417	0.0756941	2270.82
647.011	0.012898	386.94		714.206	0.0633078	1899.23
647.806	0.0129627	388.881		714.994	0.0427238	1281.71
648.601	0.0126717	380.151		715.782	0.0283629	850.887
649.396	0.0125101	375.303		716.571	0.020943	628.29
650.191	0.0121545	364.635		717.359	0.0165749	497.247
650.986	0.0127687	383.061		718.147	0.0145404	436.212
651.781	0.012801	384.03		718.935	0.0134634	403.902
652.575	0.0130596	391.788		719.723	0.0128052	384.156
653.37	0.0130273	390.819		720.511	0.0123265	369.795
654.164	0.0125424	376.272		721.298	0.0116084	348.252
654.959	0.0128657	385.971		722.086	0.0113691	341.073
655.753	0.0132213	396.639		722.874	0.0108305	324.915
656.548	0.0127041	381.123		723.661	0.0102322	306.966
657.342	0.0126071	378.213		724.449	0.0108305	324.915
658.136	0.0120575	361.725		725.236	0.0105314	315.942
658.93	0.0126394	379.182		726.023	0.0107707	323.121
659.724	0.0127687	383.061		726.81	0.0101125	303.375
660.518	0.0134476	403.428		727.597	0.0101125	303.375
661.312	0.0127364	382.092		728.385	0.0108305	324.915
662.105	0.0132213	396.639		729.172	0.0104117	312.351
662.899	0.0126071	378.213		729.958	0.0102322	306.966
663.692	0.012898	386.94		730.745	0.0108305	324.915
664.486	0.0124131	372.393		731.532	0.0096338	289.014
665.279	0.0131566	394.698		732.319	0.0103518	310.554
666.073	0.0128334	385.002		733.105	0.00975347	292.604
666.866	0.0133829	401.487		733.892	0.010292	308.76
667.659	0.012801	384.03		734.678	0.0100527	301.581
668.452	0.012995	389.85		735.465	0.0091551	274.653
669.245	0.0134476	403.428		736.251	0.00981331	294.399
670.038	0.0132536	397.608		737.037	0.0101723	305.169
670.831	0.0129303	387.909		737.823	0.0101125	303.375
671.624	0.0130596	391.788		738.609	0.00999282	299.785
672.417	0.0126394	379.182		739.395	0.0105912	317.736
673.209	0.012801	384.03		740.181	0.00975347	292.604
674.002	0.0126717	380.151		740.967	0.0100527	301.581
674.794	0.0131889	395.667		741.753	0.00951412	285.424
675.586	0.012995	389.85		742.538	0.00981331	294.399
676.379	0.0133829	401.487		743.324	0.00981331	294.399
677.171	0.0134476	403.428		744.109	0.0105314	315.942
677.963	0.0127687	383.061		744.895	0.010292	308.76
678.755	0.0131566	394.698		745.68	0.0107707	323.121
679.547	0.0130596	391.788		746.465	0.0104117	312.351
680.339	0.0136738	410.214		747.25	0.0105314	315.942
681.131	0.0133506	400.518		748.035	0.00933461	280.038
681.923	0.012801	384.03		748.821	0.0105314	315.942
682.714	0.0126071	378.213		749.605	0.00975347	292.604
683.506	0.0134799	404.397		750.39	0.0103518	310.554
684.298	0.0126071	378.213		751.175	0.010292	308.76
685.089	0.0131566	394.698		751.96	0.0096338	289.014
685.88	0.0129303	387.909		752.744	0.010292	308.76
686.672	0.0130596	391.788		753.529	0.00999282	299.785
687.463	0.0125748	377.244		754.314	0.0096338	289.014
688.254	0.0134799	404.397		755.098	0.0104117	312.351
689.045	0.0136092	408.276		755.882	0.0101125	303.375
689.836	0.0141264	423.792		756.666	0.0110699	332.097
690.627	0.0132536	397.608		757.451	0.0102322	306.966
691.418	0.0139971	419.913		758.235	0.0103518	310.554
692.208	0.0135445	406.335		759.019	0.00945428	283.628
692.999	0.0138031	414.093		759.803	0.010292	308.76
693.79	0.0134476	403.428		760.587	0.0104117	312.351
694.58	0.0140941	422.823		761.37	0.0105912	317.736
695.371	0.0141587	424.761		762.154	0.0101125	303.375
696.161	0.0138355	415.065		762.938	0.00993298	297.989
696.951	0.0151931	455.793		763.721	0.0108904	326.712
697.741	0.0157104	471.312		764.505	0.0101125	303.375
698.531	0.0188783	566.349		765.288	0.0114289	342.867
699.322	0.0257637	772.911		766.071	0.0105912	317.736
700.112	0.0342977	1028.93		766.855	0.0102322	306.966
700.901	0.0471311	1413.93		767.638	0.010292	308.76
701.691	0.050493	1514.79		768.421	0.0102322	306.966
702.481	0.0353321	1059.96		769.204	0.00951412	285.424
703.271	0.0263132	789.396		769.987	0.0103518	310.554
704.06	0.02877	863.1		770.769	0.0105314	315.942
704.85	0.0335219	1005.66		771.552	0.0107109	321.327
705.639	0.037498	1124.94		772.335	0.0104117	312.351
706.428	0.0299661	898.983		773.118	0.0104715	314.145
707.218	0.0221109	663.327		773.9	0.0108305	324.915
708.007	0.0179732	539.196		774.683	0.0100527	301.581
708.796	0.0157427	472.281		775.465	0.0113092	339.276
709.585	0.0147406	442.218		776.247	0.010292	308.76
710.374	0.0141264	423.792		777.029	0.0105912	317.736
711.163	0.0148699	446.097		777.812	0.0100527	301.581
711.951	0.014385	431.55		778.594	0.0108305	324.915
712.74	0.0146113	438.339		779.376	0.0103518	310.554
713.529	0.0143527	430.581		780.158	0.0111297	333.891
714.317	0.014482	434.46		780.939	0.0107707	323.121
715.106	0.0149992	449.976		781.721	0.0105912	317.736
715.894	0.0166478	499.434		782.503	0.0103518	310.554
716.682	0.017068	512.04		783.284	0.0105912	317.736
717.471	0.0155811	467.433		784.066	0.0104117	312.351
718.259	0.014579	437.37		784.847	0.0100527	301.581
719.047	0.0140294	420.882		785.629	0.0104117	312.351
719.835	0.014385	431.55		786.41	0.0104715	314.145
720.623	0.0132536	397.608		787.191	0.0108305	324.915
721.411	0.0133182	399.546		787.972	0.0116084	348.252
722.198	0.0139324	417.972		788.753	0.0113691	341.073
722.986	0.0136092	408.276		789.534	0.0110101	330.303
723.774	0.0131889	395.667		790.315	0.0108904	326.712
724.561	0.0137385	412.155		791.096	0.0114289	342.867
725.349	0.012898	386.94		791.877	0.0104715	314.145
726.136	0.0141587	424.761		792.657	0.0111896	335.688
726.923	0.0137062	411.186		793.438	0.0113092	339.276
727.71	0.0134152	402.456		794.219	0.010651	319.53
728.497	0.0140294	420.882		794.999	0.0101125	303.375
729.285	0.0127041	381.123		795.779	0.0111297	333.891
730.072	0.012995	389.85		796.56	0.0114289	342.867
730.858	0.0139971	419.913		797.34	0.0110699	332.097
731.645	0.0125101	375.303		798.12	0.0104715	314.145
732.432	0.0136738	410.214		798.9	0.0115486	346.458
733.219	0.0139648	418.944		799.68	0.0107109	321.327
734.005	0.0132859	398.577		800.46	0.0104715	314.145
734.792	0.0133506	400.518		801.24	0.0114888	344.664
735.578	0.0135769	407.307		802.019	0.0112494	337.482
736.365	0.0133506	400.518		802.799	0.0107109	321.327
737.151	0.0135445	406.335		803.579	0.0110101	330.303
737.937	0.0142234	426.702		804.358	0.010292	308.76
738.723	0.0143527	430.581		805.138	0.0111297	333.891
739.509	0.0128334	385.002		805.917	0.0105314	315.942
740.295	0.0133829	401.487		806.696	0.0105912	317.736
741.081	0.0136738	410.214		807.475	0.0114289	342.867
741.867	0.0134799	404.397		808.255	0.0113691	341.073
742.653	0.0132536	397.608		809.034	0.0108904	326.712
743.438	0.0136415	409.245		809.813	0.0112494	337.482
744.224	0.0133182	399.546		810.591	0.0109502	328.506
745.009	0.0132536	397.608		811.37	0.0110699	332.097
745.795	0.0139324	417.972		812.149	0.0107109	321.327
746.58	0.0138031	414.093		812.928	0.0105912	317.736
747.365	0.0133829	401.487		813.706	0.0111896	335.688
748.15	0.0139001	417.003		814.485	0.0108904	326.712
748.935	0.0139001	417.003		815.263	0.0108904	326.712
749.721	0.0133829	401.487		816.041	0.0110101	330.303
750.505	0.0138355	415.065		816.82	0.0112494	337.482
751.29	0.0137062	411.186		817.598	0.0116683	350.049
752.075	0.0138355	415.065		818.376	0.0104117	312.351
752.86	0.0135122	405.366		819.154	0.0105912	317.736
753.644	0.0133829	401.487		819.932	0.0112494	337.482
754.429	0.0139648	418.944		820.71	0.0113691	341.073
755.214	0.0135122	405.366		821.488	0.0111896	335.688
755.998	0.0137708	413.124		822.265	0.0107707	323.121
756.782	0.0136415	409.245		823.043	0.0110699	332.097
757.566	0.0138355	415.065		823.821	0.0105314	315.942
758.351	0.0137385	412.155		824.598	0.012147	364.41
759.135	0.0142557	427.671		825.375	0.0119674	359.022
759.919	0.0133506	400.518		826.153	0.0110699	332.097
760.703	0.0140294	420.882		826.93	0.0120871	362.613
761.487	0.0133829	401.487		827.707	0.0113092	339.276
762.27	0.0139001	417.003		828.484	0.0111896	335.688
763.054	0.0137062	411.186		829.261	0.0109502	328.506
763.838	0.014482	434.46		830.038	0.0112494	337.482
764.621	0.0134152	402.456		830.815	0.0111297	333.891
765.405	0.0141264	423.792		831.592	0.0113092	339.276
766.188	0.0145466	436.398		832.369	0.0104715	314.145
766.971	0.0137385	412.155		833.145	0.0112494	337.482
767.755	0.0131889	395.667		833.922	0.0110101	330.303
768.538	0.0137062	411.186		834.698	0.0120871	362.613
769.321	0.0138678	416.034		835.475	0.00550503	165.151
770.104	0.0135769	407.307		836.251	0.0111297	333.891
770.887	0.0141264	423.792		837.027	0.0112494	337.482
771.669	0.0141587	424.761		837.804	0.0117281	351.843
772.452	0.0137385	412.155		838.58	0.0119674	359.022
773.235	0.0139001	417.003		839.356	0.0114289	342.867
774.018	0.014191	425.73		840.132	0.0119674	359.022
774.8	0.0140617	421.851		840.907	0.0107109	321.327
775.583	0.0140294	420.882		841.683	0.0111896	335.688
776.365	0.0141264	423.792		842.459	0.0108904	326.712
777.147	0.0139971	419.913		843.235	0.0123265	369.795
777.929	0.0134476	403.428		844.01	0.0122068	366.204
778.712	0.0135445	406.335		844.786	0.0119674	359.022
779.494	0.0139001	417.003		845.561	0.0107109	321.327
780.276	0.0145466	436.398		846.336	0.0120871	362.613
781.058	0.014191	425.73		847.112	0.0116084	348.252
781.839	0.0140941	422.823		847.887	0.0112494	337.482
782.621	0.0138355	415.065		848.662	0.0113092	339.276
783.403	0.0143203	429.609		849.437	0.0113092	339.276
784.184	0.0139001	417.003		850.212	0.0112494	337.482
784.966	0.0140294	420.882		850.987	0.0119674	359.022
785.747	0.0145466	436.398		851.761	0.0115486	346.458
786.529	0.0139001	417.003		852.536	0.0126855	380.565
787.31	0.0137062	411.186		853.311	0.0123863	371.589
788.091	0.014579	437.37		854.085	0.0114289	342.867
788.872	0.0139648	418.944		854.86	0.0119674	359.022
789.653	0.0142234	426.702		855.634	0.0113092	339.276
790.434	0.0136415	409.245		856.409	0.012147	364.41
791.215	0.014579	437.37		857.183	0.0118478	355.434
791.996	0.0137062	411.186		857.957	0.0116084	348.252
792.777	0.0138678	416.034		858.731	0.0117281	351.843
793.557	0.0139648	418.944		859.505	0.0113092	339.276
794.338	0.014288	428.64		860.279	0.0120871	362.613
795.119	0.0138031	414.093		861.053	0.0126855	380.565
795.899	0.0140294	420.882		861.827	0.0129248	387.744
796.679	0.0139324	417.972		862.6	0.0112494	337.482
797.46	0.0135122	405.366		863.374	0.0116683	350.049
798.24	0.0139648	418.944		864.148	0.0122068	366.204
799.02	0.0143203	429.609		864.921	0.0123265	369.795
799.8	0.0146113	438.339		865.694	0.0120273	360.819
800.58	0.0142234	426.702		866.468	0.0113691	341.073
801.36	0.0138355	415.065		867.241	0.0114888	344.664
802.14	0.0134799	404.397		868.014	0.0114289	342.867
802.919	0.0137062	411.186		868.787	0.0124461	373.383
803.699	0.0139001	417.003		869.56	0.0124461	373.383
804.479	0.0137062	411.186		870.333	0.0119674	359.022
805.258	0.0140617	421.851		871.106	0.0115486	346.458
806.038	0.0143527	430.581		871.879	0.0125658	376.974
806.817	0.0141264	423.792		872.652	0.0114888	344.664
807.596	0.0144173	432.519		873.424	0.0117879	353.637
808.375	0.0148699	446.097		874.197	0.0129248	387.744
809.155	0.0145143	435.429		874.969	0.012147	364.41
809.934	0.0140294	420.882		875.742	0.012506	375.18
810.713	0.014579	437.37		876.514	0.012147	364.41
811.491	0.014191	425.73		877.286	0.0108904	326.712
812.27	0.014482	434.46		878.058	0.0113691	341.073
813.049	0.0139324	417.972		878.83	0.0120871	362.613
813.828	0.0140294	420.882		879.603	0.012147	364.41
814.606	0.0145466	436.398		880.374	0.0117879	353.637
815.385	0.0144497	433.491		881.146	0.0123863	371.589
816.163	0.0152901	458.703		881.918	0.0113092	339.276
816.941	0.0147406	442.218		882.69	0.012506	375.18
817.72	0.014385	431.55		883.461	0.0115486	346.458
818.498	0.0145466	436.398		884.233	0.0118478	355.434
819.276	0.0140941	422.823		885.004	0.0122068	366.204
820.054	0.0141587	424.761		885.776	0.0122666	367.998
820.832	0.0146113	438.339		886.547	0.0117879	353.637
821.61	0.0141587	424.761		887.318	0.0124461	373.383
822.388	0.014191	425.73		888.09	0.0123265	369.795
823.165	0.014191	425.73		888.861	0.0126257	378.771
823.943	0.0145466	436.398		889.632	0.0128052	384.156
824.721	0.0139001	417.003		890.403	0.0135232	405.696
825.498	0.0142234	426.702		891.173	0.0119674	359.022
826.275	0.0146436	439.308		891.944	0.0129248	387.744
827.053	0.0141264	423.792		892.715	0.0123265	369.795
827.83	0.0144173	432.519		893.486	0.0122068	366.204
828.607	0.014191	425.73		894.256	0.0131642	394.926
829.384	0.0138678	416.034		895.027	0.0119674	359.022
830.161	0.0152255	456.765		895.797	0.0126855	380.565
830.938	0.0141587	424.761		896.567	0.0126855	380.565
831.715	0.0147083	441.249		897.338	0.0117281	351.843
832.492	0.0146113	438.339		898.108	0.0119674	359.022
833.269	0.0143527	430.581		898.878	0.0141814	425.442
834.045	0.0130596	391.788		899.648	0.012506	375.18
834.822	0.014482	434.46		900.418	0.0133437	400.311
835.598	0.0149022	447.066		901.188	0.0126257	378.771
836.375	0.0103119	309.357		901.958	0.012506	375.18
837.151	0.0145143	435.429		902.727	0.0125658	376.974
837.927	0.0145143	435.429		903.497	0.013224	396.72
838.704	0.0148699	446.097		904.266	0.0133437	400.311
839.48	0.0147406	442.218		905.036	0.0129248	387.744
840.256	0.0148052	444.156		905.805	0.0129248	387.744
841.032	0.0144173	432.519		906.575	0.0123265	369.795
841.807	0.0148052	444.156		907.344	0.0134634	403.902
842.583	0.0139648	418.944		908.113	0.012865	385.95
843.359	0.0150638	451.914		908.882	0.012865	385.95
844.135	0.0154194	462.582		909.651	0.0128052	384.156
844.91	0.0148052	444.156		910.42	0.0125658	376.974
845.686	0.0144497	433.491		911.189	0.0123265	369.795
846.461	0.0149022	447.066		911.958	0.0131044	393.132
847.236	0.0142557	427.671		912.727	0.0129248	387.744
848.012	0.0148052	444.156		913.495	0.0116683	350.049
848.787	0.014579	437.37		914.264	0.0129847	389.541
849.562	0.0154518	463.554		915.032	0.0127453	382.359
850.337	0.0147729	443.187		915.801	0.0126855	380.565
851.112	0.0148052	444.156		916.569	0.0127453	382.359
851.887	0.0156457	469.371		917.337	0.013224	396.72
852.661	0.0169387	508.161		918.105	0.0134035	402.105
853.436	0.0162599	487.797		918.873	0.013224	396.72
854.211	0.0145143	435.429		919.642	0.0127453	382.359
854.985	0.0146436	439.308		920.409	0.0141216	423.648
855.76	0.0150638	451.914		921.177	0.0125658	376.974
856.534	0.0148052	444.156		921.945	0.012865	385.95
857.309	0.0140294	420.882		922.713	0.0141216	423.648
858.083	0.0147406	442.218		923.48	0.0137027	411.081
858.857	0.0139648	418.944		924.248	0.0135831	407.493
859.631	0.0157104	471.312		925.016	0.0123265	369.795
860.405	0.0142234	426.702		925.783	0.0131044	393.132
861.179	0.0149022	447.066		926.55	0.0125658	376.974
861.953	0.0146759	440.277		927.318	0.012865	385.95
862.727	0.0149022	447.066		928.085	0.0117281	351.843
863.5	0.014385	431.55		928.852	0.0131044	393.132
864.274	0.014579	437.37		929.619	0.0131044	393.132
865.048	0.0146113	438.339		930.386	0.012506	375.18
865.821	0.0153548	460.644		931.153	0.0124461	373.383
866.594	0.0152255	456.765		931.92	0.0131642	394.926
867.368	0.0150962	452.886		932.686	0.0139421	418.263
868.141	0.014288	428.64		933.453	0.0129847	389.541
868.914	0.0149669	449.007		934.22	0.0131642	394.926
869.687	0.0158073	474.219		934.986	0.0134634	403.902
870.46	0.0153225	459.675		935.752	0.0146003	438.009
871.233	0.0147729	443.187		936.519	0.0129248	387.744
872.006	0.0146113	438.339		937.285	0.0136429	409.287
872.779	0.0149992	449.976		938.051	0.013224	396.72
873.552	0.0151608	454.824		938.817	0.0125658	376.974
874.324	0.014579	437.37		939.583	0.0136429	409.287
875.097	0.0148699	446.097		940.349	0.0138822	416.466
875.869	0.0141587	424.761		941.115	0.0133437	400.311
876.642	0.0153871	461.613		941.881	0.0138822	416.466
877.414	0.0140941	422.823		942.647	0.0138224	414.672
878.186	0.0152578	457.734		943.412	0.0142413	427.239
878.958	0.0152255	456.765		944.178	0.0134634	403.902
879.73	0.0146436	439.308		944.944	0.0138822	416.466
880.503	0.0151608	454.824		945.709	0.0137027	411.081
881.274	0.0149669	449.007		946.474	0.012506	375.18
882.046	0.0149992	449.976		947.24	0.0139421	418.263
882.818	0.0151285	453.855		948.005	0.0142413	427.239
883.59	0.0149669	449.007		948.77	0.0135831	407.493
884.361	0.0150962	452.886		949.535	0.0134035	402.105
885.133	0.0145466	436.398		950.3	0.0137027	411.081
885.904	0.0152901	458.703		951.065	0.0137027	411.081
886.676	0.014288	428.64		951.83	0.0146003	438.009
887.447	0.0144497	433.491		952.594	0.0141216	423.648
888.218	0.015872	476.16		953.359	0.0141216	423.648
888.99	0.0151608	454.824		954.124	0.0140618	421.854
889.761	0.0153871	461.613		954.888	0.01472	441.6
890.532	0.0148052	444.156		955.653	0.0134634	403.902
891.303	0.0153871	461.613		956.417	0.0140019	420.057
892.073	0.0146113	438.339		957.181	0.0137027	411.081
892.844	0.0153871	461.613		957.946	0.0144208	432.624
893.615	0.0152901	458.703		958.71	0.0135831	407.493
894.386	0.0147083	441.249		959.474	0.0138822	416.466
895.156	0.0153225	459.675		960.238	0.0143609	430.827
895.927	0.0149992	449.976		961.002	0.0138224	414.672
896.697	0.0156457	469.371		961.765	0.0138822	416.466
897.467	0.0152578	457.734		962.529	0.0138224	414.672
898.238	0.015678	470.34		963.293	0.013224	396.72
899.008	0.0146759	440.277		964.056	0.0138822	416.466
899.778	0.0153548	460.644		964.82	0.0132839	398.517
900.548	0.0160983	482.949		965.583	0.0138224	414.672
901.318	0.0151608	454.824		966.347	0.0132839	398.517
902.088	0.0160013	480.039		967.11	0.0139421	418.263
902.858	0.0149669	449.007		967.873	0.0138822	416.466
903.627	0.0151608	454.824		968.636	0.0138822	416.466
904.397	0.0149345	448.035		969.4	0.0143609	430.827
905.166	0.0149992	449.976		970.163	0.0141814	425.442
905.936	0.0150315	450.945		970.925	0.0143609	430.827
906.705	0.0149992	449.976		971.688	0.0138822	416.466
907.475	0.0154518	463.554		972.451	0.0136429	409.287
908.244	0.0158397	475.191		973.214	0.0143011	429.033
909.013	0.0153548	460.644		973.976	0.0144208	432.624
909.782	0.0149992	449.976		974.739	0.0146003	438.009
910.551	0.0153548	460.644		975.501	0.0140618	421.854
911.32	0.0154518	463.554		976.264	0.0134634	403.902
912.089	0.0149669	449.007		977.026	0.0144208	432.624
912.858	0.0155164	465.492		977.788	0.0140019	420.057
913.627	0.0158397	475.191		978.55	0.0141216	423.648
914.395	0.0152255	456.765		979.313	0.0141216	423.648
915.164	0.0148699	446.097		980.075	0.0151987	455.961
915.932	0.015969	479.07		980.836	0.0138224	414.672
916.701	0.0151608	454.824		981.598	0.0144806	434.418
917.469	0.0150962	452.886		982.36	0.0148396	445.188
918.237	0.0154518	463.554		983.122	0.0139421	418.263
919.005	0.0151285	453.855		983.883	0.015079	452.37
919.773	0.0156134	468.402		984.645	0.0148995	446.985
920.542	0.0155487	466.461		985.406	0.01472	441.6
921.309	0.0157427	472.281		986.168	0.0156175	468.525
922.077	0.0149345	448.035		986.929	0.0139421	418.263
922.845	0.0151931	455.793		987.69	0.0145404	436.212
923.613	0.0157427	472.281		988.452	0.0153183	459.549
924.38	0.0156134	468.402		989.213	0.0153183	459.549
925.148	0.0151931	455.793		989.974	0.0150191	450.573
925.916	0.0154518	463.554		990.735	0.0156774	470.322
926.683	0.0161629	484.887		991.496	0.0159167	477.501
927.45	0.0154194	462.582		992.256	0.0156774	470.322
928.218	0.0151608	454.824		993.017	0.0146003	438.009
928.985	0.0152255	456.765		993.778	0.0154978	464.934
929.752	0.015969	479.07		994.538	0.0155577	466.731
930.519	0.0152255	456.765		995.299	0.0153782	461.346
931.286	0.0152901	458.703		996.059	0.015438	463.14
932.053	0.0156457	469.371		996.819	0.0155577	466.731
932.82	0.0155811	467.433		997.58	0.0154978	464.934
933.586	0.0155164	465.492		998.34	0.0158569	475.707
934.353	0.0162599	487.797		999.1	0.0150191	450.573
935.12	0.015872	476.16		999.86	0.0147798	443.394
935.886	0.015872	476.16		1000.62	0.0157372	472.116
936.652	0.0156134	468.402		1001.38	0.0155577	466.731
937.419	0.0155811	467.433		1002.14	0.0170536	511.608
938.185	0.0150638	451.914		1002.9	0.0162757	488.271
938.951	0.0160336	481.008		1003.66	0.0165151	495.453
939.717	0.0163246	489.738		1004.42	0.0163954	491.862
940.483	0.015872	476.16		1005.18	0.015797	473.91
941.249	0.0153225	459.675		1005.94	0.015797	473.91
942.015	0.0149022	447.066		1006.7	0.0153782	461.346
942.781	0.0161952	485.856		1007.46	0.0168741	506.223
943.547	0.0154518	463.554		1008.22	0.0155577	466.731
944.312	0.0155164	465.492		1008.97	0.0155577	466.731
945.078	0.0154518	463.554		1009.73	0.0151388	454.164
945.844	0.0154841	464.523		1010.49	0.0168741	506.223
946.609	0.0153871	461.613		1011.25	0.0160364	481.092
947.374	0.0153548	460.644		1012.01	0.0162159	486.477
948.14	0.0149992	449.976		1012.77	0.0161561	484.683
948.905	0.0152578	457.734		1013.53	0.0159167	477.501
949.67	0.0158397	475.191		1014.29	0.0162757	488.271
950.435	0.0153548	460.644		1015.04	0.0151987	455.961
951.2	0.0159366	478.098		1015.8	0.0166946	500.838
951.965	0.0154518	463.554		1016.56	0.0165151	495.453
952.73	0.0160983	482.949		1017.32	0.0162159	486.477
953.494	0.0154841	464.523		1018.08	0.0161561	484.683
954.259	0.0150315	450.945		1018.84	0.0158569	475.707
955.024	0.0156457	469.371		1019.59	0.0166348	499.044
955.788	0.0157427	472.281		1020.35	0.0148396	445.188
956.553	0.0154518	463.554		1021.11	0.0166348	499.044
957.317	0.0154841	464.523		1021.87	0.0162757	488.271
958.081	0.0156457	469.371		1022.63	0.0161561	484.683
958.846	0.014579	437.37		1023.38	0.0172331	516.993
959.61	0.0155811	467.433		1024.14	0.0161561	484.683
960.374	0.0165832	497.496		1024.9	0.0159167	477.501
961.138	0.0155487	466.461		1025.66	0.0166946	500.838
961.902	0.0160659	481.977		1026.41	0.0162159	486.477
962.665	0.0154194	462.582		1027.17	0.0165151	495.453
963.429	0.0157104	471.312		1027.93	0.0161561	484.683
964.193	0.0163892	491.676		1028.69	0.0162159	486.477
964.956	0.0154841	464.523		1029.44	0.0165749	497.247
965.72	0.0151285	453.855		1030.2	0.0165749	497.247
966.483	0.015678	470.34		1030.96	0.017293	518.79
967.247	0.0153871	461.613		1031.71	0.0168143	504.429
968.01	0.015969	479.07		1032.47	0.0165749	497.247
968.773	0.0154194	462.582		1033.23	0.0165151	495.453
969.536	0.0165508	496.524		1033.98	0.0175323	525.969
970.3	0.0161952	485.856		1034.74	0.0162159	486.477
971.063	0.0155487	466.461		1035.5	0.0168741	506.223
971.825	0.0160983	482.949		1036.25	0.0161561	484.683
972.588	0.0154518	463.554		1037.01	0.0165151	495.453
973.351	0.0163892	491.676		1037.77	0.0171733	515.199
974.114	0.0160983	482.949		1038.52	0.0167544	502.632
974.876	0.015872	476.16		1039.28	0.0159765	479.295
975.639	0.0161306	483.918		1040.03	0.015797	473.91
976.401	0.0169387	508.161		1040.79	0.0167544	502.632
977.164	0.015678	470.34		1041.55	0.0168143	504.429
977.926	0.0154518	463.554		1042.3	0.0175323	525.969
978.688	0.015775	473.25		1043.06	0.0175921	527.763
979.45	0.0163569	490.707		1043.81	0.0162757	488.271
980.213	0.015775	473.25		1044.57	0.0170536	511.608
980.975	0.0154518	463.554		1045.32	0.0162757	488.271
981.736	0.0167771	503.313		1046.08	0.0166348	499.044
982.498	0.0158397	475.191		1046.83	0.0163356	490.068
983.26	0.0153871	461.613		1047.59	0.0169339	508.017
984.022	0.0157427	472.281		1048.34	0.0173528	520.584
984.783	0.0159043	477.129		1049.1	0.0162757	488.271
985.545	0.0152901	458.703		1049.85	0.0172331	516.993
986.306	0.0163569	490.707		1050.61	0.0163954	491.862
987.068	0.017068	512.04		1051.36	0.0162757	488.271
987.829	0.0157427	472.281		1052.12	0.0177118	531.354
988.59	0.0161952	485.856		1052.87	0.0181905	545.715
989.352	0.0165185	495.555		1053.63	0.0179512	538.536
990.113	0.0161952	485.856		1054.38	0.0167544	502.632
990.874	0.0161629	484.887		1055.14	0.0182504	547.512
991.635	0.0165832	497.496		1055.89	0.0163954	491.862
992.396	0.0164539	493.617		1056.65	0.0174725	524.175
993.156	0.0154518	463.554		1057.4	0.0168741	506.223
993.917	0.0154518	463.554		1058.16	0.0165151	495.453
994.678	0.0153225	459.675		1058.91	0.0189086	567.258
995.438	0.0160659	481.977		1059.66	0.0186094	558.282
996.199	0.0148376	445.128		1060.42	0.0180708	542.124
996.959	0.0162922	488.766		1061.17	0.0184299	552.897
997.719	0.015872	476.16		1061.93	0.0172331	516.993
998.48	0.0163569	490.707		1062.68	0.0179512	538.536
999.24	0.0167125	501.375		1063.43	0.019866	595.98
1000	0.0160659	481.977		1064.19	0.0193873	581.619
1000.76	0.0163246	489.738		1064.94	0.0198061	594.183
1001.52	0.015969	479.07		1065.69	0.0199258	597.774
1002.28	0.0166801	500.403		1066.45	0.022798	683.94
1003.04	0.0160659	481.977		1067.2	0.0240546	721.638
1003.8	0.0164215	492.645		1067.95	0.0238751	716.253
1004.56	0.0161629	484.887		1068.71	0.0215414	646.242
1005.32	0.0158073	474.219		1069.46	0.0197463	592.389
1006.08	0.0167448	502.344		1070.21	0.0200455	601.365
1006.84	0.0164539	493.617		1070.97	0.020225	606.75
1007.6	0.0161952	485.856		1071.72	0.0216012	648.036
1008.36	0.0155164	465.492		1072.47	0.0220799	662.397
1009.12	0.0162922	488.766		1073.22	0.0197463	592.389
1009.87	0.0160659	481.977		1073.98	0.0203447	610.341
1010.63	0.0168094	504.282		1074.73	0.0223193	669.579
1011.39	0.0157427	472.281		1075.48	0.0219004	657.012
1012.15	0.015872	476.16		1076.23	0.0247726	743.178
1012.91	0.0159366	478.098		1076.99	0.0252513	757.539
1013.67	0.0162922	488.766		1077.74	0.0249521	748.563
1014.43	0.0157104	471.312		1078.49	0.0269268	807.804
1015.19	0.0164215	492.645		1079.24	0.0294399	883.197
1015.94	0.0168094	504.282		1080	0.0302178	906.534
1016.7	0.0162276	486.828		1080.75	0.0344663	1033.99
1017.46	0.0161306	483.918		1081.5	0.0405098	1215.29
1018.22	0.0156457	469.371		1082.25	0.0509813	1529.44
1018.98	0.0159366	478.098		1083	0.0679153	2037.46
1019.74	0.0161306	483.918		1083.75	0.094842	2845.26
1020.49	0.0165185	495.555		1084.51	0.152645	4579.35
1021.25	0.0157104	471.312		1085.26	0.27196	8158.8
1022.01	0.0164539	493.617		1086.01	0.572403	17172.1
1022.77	0.0165832	497.496		1086.76	0.999581	29987.4
1023.53	0.0167125	501.375		1087.51	0.956857	28705.7
1024.28	0.0165832	497.496		1088.26	0.519208	15576.2
1025.04	0.0175206	525.618		1089.01	0.227322	6819.66
1025.8	0.0160983	482.949		1089.76	0.113033	3390.99
1026.56	0.0169064	507.192		1090.52	0.0698301	2094.9
1027.31	0.0168741	506.223		1091.27	0.0509215	1527.64
1028.07	0.0152255	456.765		1092.02	0.0441	1323
1028.83	0.0160659	481.977		1092.77	0.037518	1125.54
1029.59	0.0162276	486.828		1093.52	0.0313547	940.641
1030.34	0.0167125	501.375		1094.27	0.0282432	847.296
1031.1	0.0160983	482.949		1095.02	0.0269866	809.598
1031.86	0.0163246	489.738		1095.77	0.0257899	773.697
1032.61	0.0163569	490.707		1096.52	0.0251316	753.948
1033.37	0.0163569	490.707		1097.27	0.0245333	735.999
1034.13	0.015969	479.07		1098.02	0.0221996	665.988
1034.88	0.0163246	489.738		1098.77	0.022439	673.17
1035.64	0.0166801	500.403		1099.52	0.0235759	707.277
1036.4	0.0163246	489.738		1100.27	0.0202848	608.544
1037.15	0.0166155	498.465		1101.02	0.0219004	657.012
1037.91	0.0155487	466.461		1101.77	0.020943	628.29
1038.67	0.0175853	527.559		1102.52	0.0208832	626.496
1039.42	0.0169064	507.192		1103.27	0.0208832	626.496
1040.18	0.0160013	480.039		1104.02	0.0214816	644.448
1040.93	0.0162922	488.766		1104.77	0.0198061	594.183
1041.69	0.0165832	497.496		1105.52	0.0207635	622.905
1042.45	0.0163246	489.738		1106.27	0.0194471	583.413
1043.2	0.0167125	501.375		1107.02	0.0199258	597.774
1043.96	0.0159043	477.129		1107.77	0.0169938	509.814
1044.71	0.0166478	499.434		1108.52	0.0187889	563.667
1045.47	0.0165832	497.496		1109.27	0.0189086	567.258
1046.22	0.0158397	475.191		1110.01	0.0191479	574.437
1046.98	0.0170357	511.071		1110.76	0.0201652	604.956
1047.73	0.0168741	506.223		1111.51	0.0190282	570.846
1048.49	0.0164539	493.617		1112.26	0.0197463	592.389
1049.24	0.015678	470.34		1113.01	0.0192078	576.234
1050	0.0174236	522.708		1113.76	0.0197463	592.389
1050.75	0.0169387	508.161		1114.51	0.019866	595.98
1051.51	0.0167125	501.375		1115.26	0.0193873	581.619
1052.26	0.0173267	519.801		1116	0.0191479	574.437
1053.02	0.0164215	492.645		1116.75	0.0183102	549.306
1053.77	0.017456	523.68		1117.5	0.0195069	585.207
1054.53	0.0165185	495.555		1118.25	0.0196266	588.798
1055.28	0.0171004	513.012		1119	0.0182504	547.512
1056.04	0.0175853	527.559		1119.75	0.0188487	565.461
1056.79	0.0175853	527.559		1120.49	0.0191479	574.437
1057.55	0.0179085	537.255		1121.24	0.0203447	610.341
1058.3	0.0190722	572.166		1121.99	0.0181307	543.921
1059.06	0.020333	609.99		1122.74	0.0193274	579.822
1059.81	0.020139	604.17		1123.48	0.0193873	581.619
1060.56	0.0190722	572.166		1124.23	0.0194471	583.413
1061.32	0.0182318	546.954		1124.98	0.0187889	563.667
1062.07	0.0174883	524.649		1125.73	0.0207635	622.905
1062.83	0.0169387	508.161		1126.47	0.0203447	610.341
1063.58	0.017359	520.77		1127.22	0.0193873	581.619
1064.33	0.017068	512.04		1127.97	0.0186692	560.076
1065.09	0.0170034	510.102		1128.72	0.0204643	613.929
1065.84	0.0171973	515.919		1129.46	0.0189684	569.052
1066.59	0.0182318	546.954		1130.21	0.0201053	603.159
1067.35	0.0180378	541.134		1130.96	0.0181307	543.921
1068.1	0.0168094	504.282		1131.7	0.019866	595.98
1068.85	0.0180055	540.165		1132.45	0.0195668	587.004
1069.61	0.0186843	560.529		1133.2	0.0186094	558.282
1070.36	0.0177146	531.438		1133.94	0.019866	595.98
1071.11	0.0183288	549.864		1134.69	0.0202848	608.544
1071.87	0.0180055	540.165		1135.44	0.0195668	587.004
1072.62	0.0192662	577.986		1136.18	0.0208832	626.496
1073.37	0.0193309	579.927		1136.93	0.0201053	603.159
1074.12	0.0196218	588.654		1137.68	0.0192078	576.234
1074.88	0.0194925	584.775		1138.42	0.0199856	599.568
1075.63	0.0209471	628.413		1139.17	0.0193873	581.619
1076.38	0.0216583	649.749		1139.92	0.0190282	570.846
1077.13	0.0227897	683.691		1140.66	0.0194471	583.413
1077.89	0.024503	735.09		1141.41	0.0193873	581.619
1078.64	0.0259577	778.731		1142.15	0.0203447	610.341
1079.39	0.0289963	869.889		1142.9	0.0201652	604.956
1080.14	0.0341684	1025.05		1143.64	0.0202848	608.544
1080.9	0.0398254	1194.76		1144.39	0.019866	595.98
1081.65	0.0541458	1624.37		1145.14	0.0198061	594.183
1082.4	0.0866009	2598.03		1145.88	0.0201652	604.956
1083.15	0.190755	5722.65		1146.63	0.0199258	597.774
1083.9	0.44406	13321.8		1147.37	0.020584	617.52
1084.65	0.84364	25309.2		1148.12	0.0204045	612.135
1085.41	1.00145	30043.5		1148.86	0.019866	595.98
1086.16	0.475319	14259.6		1149.61	0.0204045	612.135
1086.91	0.141684	4250.52		1150.35	0.0204643	613.929
1087.66	0.0675933	2027.8		1151.1	0.0189086	567.258
1088.41	0.0458704	1376.11		1151.84	0.0212422	637.266
1089.16	0.0350089	1050.27		1152.59	0.0206438	619.314
1089.91	0.0308065	924.195		1153.33	0.0192078	576.234
1090.66	0.0265395	796.185		1154.08	0.0214217	642.651
1091.42	0.0245676	737.028		1154.82	0.0200455	601.365
1092.17	0.0232746	698.238		1155.57	0.0199856	599.568
1092.92	0.0211734	635.202		1156.31	0.0213021	639.063
1093.67	0.0213997	641.991		1157.05	0.0202848	608.544
1094.42	0.0202037	606.111		1157.8	0.0207635	622.905
1095.17	0.0203653	610.959		1158.54	0.0196266	588.798
1095.92	0.0195895	587.685		1159.29	0.0205242	615.726
1096.67	0.0205269	615.807		1160.03	0.0200455	601.365
1097.42	0.0194925	584.775		1160.77	0.0199856	599.568
1098.17	0.0189753	569.259		1161.52	0.0197463	592.389
1098.92	0.0188783	566.349		1162.26	0.0207037	621.111
1099.67	0.0180055	540.165		1163.01	0.0198061	594.183
1100.42	0.018846	565.38		1163.75	0.020225	606.75
1101.17	0.0181348	544.044		1164.49	0.0198061	594.183
1101.92	0.0175529	526.587		1165.24	0.0204045	612.135
1102.67	0.0178762	536.286		1165.98	0.0195668	587.004
1103.42	0.0183934	551.802		1166.72	0.020943	628.29
1104.17	0.0181348	544.044		1167.47	0.0207635	622.905
1104.92	0.0171973	515.919		1168.21	0.0199258	597.774
1105.67	0.0172943	518.829		1168.95	0.0214217	642.651
1106.42	0.0182318	546.954		1169.7	0.0201652	604.956
1107.17	0.0172297	516.891		1170.44	0.0202848	608.544
1107.92	0.0175853	527.559		1171.18	0.0196266	588.798
1108.67	0.0151608	454.824		1171.92	0.0214217	642.651
1109.42	0.0176822	530.466		1172.67	0.0213619	640.857
1110.17	0.0180701	542.103		1173.41	0.0213021	639.063
1110.91	0.0171973	515.919		1174.15	0.0208234	624.702
1111.66	0.017359	520.77		1174.9	0.0207037	621.111
1112.41	0.017359	520.77		1175.64	0.0208234	624.702
1113.16	0.0176176	528.528		1176.38	0.0201053	603.159
1113.91	0.0166155	498.465		1177.12	0.020943	628.29
1114.66	0.0171004	513.012		1177.87	0.0203447	610.341
1115.41	0.0176822	530.466		1178.61	0.0216611	649.833
1116.16	0.0172297	516.891		1179.35	0.0202848	608.544
1116.9	0.0178115	534.345		1180.09	0.0210627	631.881
1117.65	0.0173267	519.801		1180.83	0.0212422	637.266
1118.4	0.0175853	527.559		1181.58	0.020584	617.52
1119.15	0.0178762	536.286		1182.32	0.0214217	642.651
1119.9	0.017359	520.77		1183.06	0.0216611	649.833
1120.65	0.0172297	516.891		1183.8	0.020584	617.52
1121.39	0.0175206	525.618		1184.54	0.0215414	646.242
1122.14	0.0180055	540.165		1185.28	0.0224988	674.964
1122.89	0.0181671	545.013		1186.02	0.0211225	633.675
1123.64	0.0175206	525.618		1186.77	0.0222595	667.785
1124.38	0.0173267	519.801		1187.51	0.0226185	678.555
1125.13	0.017165	514.95		1188.25	0.0211824	635.472
1125.88	0.0177469	532.407		1188.99	0.0217209	651.627
1126.63	0.0179732	539.196		1189.73	0.0221398	664.194
1127.37	0.017456	523.68		1190.47	0.0217209	651.627
1128.12	0.0177792	533.376		1191.21	0.022798	683.94
1128.87	0.017262	517.86		1191.95	0.0232169	696.507
1129.62	0.017165	514.95		1192.69	0.0220201	660.603
1130.36	0.0165185	495.555		1193.44	0.0221398	664.194
1131.11	0.0178439	535.317		1194.18	0.0223791	671.373
1131.86	0.0174236	522.708		1194.92	0.0216012	648.036
1132.6	0.0169064	507.192		1195.66	0.0214816	644.448
1133.35	0.0171327	513.981		1196.4	0.022439	673.17
1134.1	0.0167448	502.344		1197.14	0.0216611	649.833
1134.84	0.0171327	513.981		1197.88	0.0208234	624.702
1135.59	0.0173267	519.801		1198.62	0.0217808	653.424
1136.34	0.0172943	518.829		1199.36	0.0223193	669.579
1137.08	0.0177792	533.376		1200.1	0.0212422	637.266
1137.83	0.0174883	524.649		1200.84	0.0218406	655.218
1138.58	0.0181348	544.044		1201.58	0.0215414	646.242
1139.32	0.0173913	521.739		1202.32	0.0210627	631.881
1140.07	0.0177792	533.376		1203.06	0.0229177	687.531
1140.82	0.0173267	519.801		1203.8	0.0221996	665.988
1141.56	0.0176499	529.497		1204.54	0.0215414	646.242
1142.31	0.017262	517.86		1205.28	0.0222595	667.785
1143.05	0.0173913	521.739		1206.02	0.022439	673.17
1143.8	0.0168094	504.282		1206.76	0.0224988	674.964
1144.54	0.017068	512.04		1207.49	0.0212422	637.266
1145.29	0.017165	514.95		1208.23	0.0229775	689.325
1146.04	0.0170357	511.071		1208.97	0.0222595	667.785
1146.78	0.0171327	513.981		1209.71	0.0219603	658.809
1147.53	0.0172943	518.829		1210.45	0.0221996	665.988
1148.27	0.0182964	548.892		1211.19	0.0219603	658.809
1149.02	0.0168418	505.254		1211.93	0.0221996	665.988
1149.76	0.0183934	551.802		1212.67	0.0220799	662.397
1150.51	0.0175529	526.587		1213.41	0.0215414	646.242
1151.25	0.0176499	529.497		1214.14	0.0219603	658.809
1152	0.0181995	545.985		1214.88	0.0215414	646.242
1152.74	0.0182641	547.923		1215.62	0.0225586	676.758
1153.49	0.0179408	538.224		1216.36	0.0223193	669.579
1154.23	0.0184257	552.771		1217.1	0.022439	673.17
1154.98	0.0176499	529.497		1217.84	0.0221398	664.194
1155.72	0.0177469	532.407		1218.58	0.022798	683.94
1156.47	0.0175853	527.559		1219.31	0.0226783	680.349
1157.21	0.0172943	518.829		1220.05	0.0232169	696.507
1157.95	0.0178439	535.317		1220.79	0.0223791	671.373
1158.7	0.0181025	543.075		1221.53	0.022439	673.17
1159.44	0.0181995	545.985		1222.26	0.0235759	707.277
1160.19	0.0176176	528.528		1223	0.0244136	732.408
1160.93	0.0186197	558.591		1223.74	0.0236955	710.865
1161.67	0.0181025	543.075		1224.48	0.0232169	696.507
1162.42	0.0176822	530.466		1225.22	0.0221996	665.988
1163.16	0.0175529	526.587		1225.95	0.0232169	696.507
1163.91	0.0179732	539.196		1226.69	0.0232169	696.507
1164.65	0.0171004	513.012		1227.43	0.022439	673.17
1165.39	0.0171973	515.919		1228.16	0.0228578	685.734
1166.14	0.0172943	518.829		1228.9	0.0230972	692.916
1166.88	0.0178439	535.317		1229.64	0.0217808	653.424
1167.62	0.0171327	513.981		1230.38	0.0219004	657.012
1168.37	0.0176822	530.466		1231.11	0.0242341	727.023
1169.11	0.0183611	550.833		1231.85	0.0245333	735.999
1169.85	0.0177792	533.376		1232.59	0.0238152	714.456
1170.6	0.0174883	524.649		1233.32	0.0225586	676.758
1171.34	0.0172297	516.891		1234.06	0.0241144	723.432
1172.08	0.0170034	510.102		1234.8	0.0219004	657.012
1172.82	0.0171973	515.919		1235.53	0.0232169	696.507
1173.57	0.0175853	527.559		1236.27	0.0238152	714.456
1174.31	0.0173267	519.801		1237.01	0.0244136	732.408
1175.05	0.017456	523.68		1237.74	0.022798	683.94
1175.8	0.017456	523.68		1238.48	0.023157	694.71
1176.54	0.0176176	528.528		1239.21	0.0237554	712.662
1177.28	0.017456	523.68		1239.95	0.0234562	703.686
1178.02	0.0179085	537.255		1240.69	0.0233365	700.095
1178.77	0.017068	512.04		1241.42	0.0229775	689.325
1179.51	0.0174883	524.649		1242.16	0.0223193	669.579
1180.25	0.0178439	535.317		1242.89	0.022439	673.17
1180.99	0.0174883	524.649		1243.63	0.023157	694.71
1181.73	0.0170034	510.102		1244.37	0.0240546	721.638
1182.48	0.017262	517.86		1245.1	0.0229177	687.531
1183.22	0.0177469	532.407		1245.84	0.0225586	676.758
1183.96	0.0181025	543.075		1246.57	0.0238152	714.456
1184.7	0.0178439	535.317		1247.31	0.0246529	739.587
1185.44	0.017456	523.68		1248.04	0.0229177	687.531
1186.18	0.0179408	538.224		1248.78	0.0239947	719.841
1186.92	0.0176499	529.497		1249.51	0.0235759	707.277
1187.67	0.0176176	528.528		1250.25	0.0230373	691.119
1188.41	0.0183611	550.833		1250.98	0.0235759	707.277
1189.15	0.017068	512.04		1251.72	0.0242939	728.817
1189.89	0.0171973	515.919		1252.45	0.0232169	696.507
1190.63	0.017262	517.86		1253.19	0.0242939	728.817
1191.37	0.0178439	535.317		1253.92	0.0243538	730.614
1192.11	0.0181671	545.013		1254.66	0.023157	694.71
1192.85	0.0186843	560.529		1255.39	0.0244734	734.202
1193.59	0.0189753	569.259		1256.12	0.0245333	735.999
1194.34	0.0183611	550.833		1256.86	0.0239947	719.841
1195.08	0.0171973	515.919		1257.59	0.0240546	721.638
1195.82	0.0177146	531.438		1258.33	0.0248325	744.975
1196.56	0.0177146	531.438		1259.06	0.0236955	710.865
1197.3	0.017359	520.77		1259.8	0.0243538	730.614
1198.04	0.0181348	544.044		1260.53	0.0236357	709.071
1198.78	0.0183611	550.833		1261.26	0.0241742	725.226
1199.52	0.0172297	516.891		1262	0.0244136	732.408
1200.26	0.0181348	544.044		1262.73	0.0238751	716.253
1201	0.0179408	538.224		1263.46	0.0247128	741.384
1201.74	0.0186843	560.529		1264.2	0.0244734	734.202
1202.48	0.0177146	531.438		1264.93	0.0230373	691.119
1203.22	0.0184257	552.771		1265.67	0.0254907	764.721
1203.96	0.0186197	558.591		1266.4	0.0262087	786.261
1204.7	0.0178439	535.317		1267.13	0.0242939	728.817
1205.44	0.0177146	531.438		1267.87	0.0234562	703.686
1206.18	0.0184257	552.771		1268.6	0.0247726	743.178
1206.92	0.0179408	538.224		1269.33	0.0245931	737.793
1207.66	0.0180378	541.134		1270.06	0.0239947	719.841
1208.39	0.0174236	522.708		1270.8	0.0244136	732.408
1209.13	0.0175529	526.587		1271.53	0.0250718	752.154
1209.87	0.0180701	542.103		1272.26	0.0255505	766.515
1210.61	0.0177792	533.376		1273	0.0239947	719.841
1211.35	0.0178762	536.286		1273.73	0.025012	750.36
1212.09	0.0181995	545.985		1274.46	0.0246529	739.587
1212.83	0.0178115	534.345		1275.19	0.0245333	735.999
1213.57	0.0183288	549.864		1275.93	0.0252513	757.539
1214.31	0.0179732	539.196		1276.66	0.0265079	795.237
1215.04	0.0175853	527.559		1277.39	0.0251316	753.948
1215.78	0.0176176	528.528		1278.12	0.0251316	753.948
1216.52	0.0188783	566.349		1278.86	0.0246529	739.587
1217.26	0.0176499	529.497		1279.59	0.0248923	746.769
1218	0.0182641	547.923		1280.32	0.0251316	753.948
1218.74	0.0174883	524.649		1281.05	0.0243538	730.614
1219.48	0.0178762	536.286		1281.78	0.0265677	797.031
1220.21	0.0176176	528.528		1282.52	0.026089	782.67
1220.95	0.0186843	560.529		1283.25	0.0259694	779.082
1221.69	0.0176176	528.528		1283.98	0.0256702	770.106
1222.43	0.017456	523.68		1284.71	0.0249521	748.563
1223.16	0.0176822	530.466		1285.44	0.0251915	755.745
1223.9	0.0174236	522.708		1286.17	0.0256103	768.309
1224.64	0.0180055	540.165		1286.9	0.0247128	741.384
1225.38	0.0174236	522.708		1287.64	0.0242939	728.817
1226.12	0.0176822	530.466		1288.37	0.0245333	735.999
1226.85	0.0182964	548.892		1289.1	0.0256103	768.309
1227.59	0.0179732	539.196		1289.83	0.0254308	762.924
1228.33	0.0180378	541.134		1290.56	0.0247726	743.178
1229.06	0.0183288	549.864		1291.29	0.0251915	755.745
1229.8	0.0180701	542.103		1292.02	0.0266276	798.828
1230.54	0.0177469	532.407		1292.75	0.0268669	806.007
1231.28	0.0180055	540.165		1293.48	0.0247726	743.178
1232.01	0.0176499	529.497		1294.21	0.0251316	753.948
1232.75	0.0182318	546.954		1294.94	0.025371	761.13
1233.49	0.0190076	570.228		1295.67	0.0255505	766.515
1234.22	0.0175206	525.618		1296.41	0.0269866	809.598
1234.96	0.0182318	546.954		1297.14	0.0248923	746.769
1235.7	0.0187167	561.501		1297.87	0.0268669	806.007
1236.43	0.0173267	519.801		1298.6	0.0259095	777.285
1237.17	0.0193632	580.896		1299.33	0.0256103	768.309
1237.91	0.0182964	548.892		1300.06	0.0259095	777.285
1238.64	0.0176176	528.528		1300.79	0.0260292	780.876
1239.38	0.018846	565.38		1301.52	0.0269866	809.598
1240.11	0.0175206	525.618		1302.25	0.0252513	757.539
1240.85	0.0176499	529.497		1302.98	0.0250718	752.154
1241.59	0.0174236	522.708		1303.71	0.026089	782.67
1242.32	0.0172943	518.829		1304.43	0.0254907	764.721
1243.06	0.0182964	548.892		1305.16	0.0266276	798.828
1243.79	0.0182964	548.892		1305.89	0.0271661	814.983
1244.53	0.0189106	567.318		1306.62	0.0275251	825.753
1245.27	0.0180055	540.165		1307.35	0.0271063	813.189
1246	0.0185874	557.622		1308.08	0.0266874	800.622
1246.74	0.0190722	572.166		1308.81	0.0269866	809.598
1247.47	0.0177146	531.438		1309.54	0.0277046	831.138
1248.21	0.0179408	538.224		1310.27	0.027585	827.55
1248.94	0.0181025	543.075		1311	0.0277046	831.138
1249.68	0.0182641	547.923		1311.73	0.0255505	766.515
1250.41	0.0176499	529.497		1312.46	0.0271661	814.983
1251.15	0.0177469	532.407		1313.18	0.0284825	854.475
1251.88	0.0182641	547.923		1313.91	0.0268669	806.007
1252.62	0.0183611	550.833		1314.64	0.0280038	840.114
1253.35	0.0177792	533.376		1315.37	0.0262685	788.055
1254.09	0.018555	556.65		1316.1	0.0270464	811.392
1254.82	0.0177469	532.407		1316.83	0.0284825	854.475
1255.56	0.0180378	541.134		1317.55	0.027944	838.32
1256.29	0.0180378	541.134		1318.28	0.0226783	680.349
1257.02	0.0188783	566.349		1319.01	0.028303	849.09
1257.76	0.018749	562.47		1319.74	0.0277645	832.935
1258.49	0.0182641	547.923		1320.47	0.0272259	816.777
1259.23	0.0171327	513.981		1321.2	0.0280038	840.114
1259.96	0.0175206	525.618		1321.92	0.0282432	847.296
1260.7	0.0186197	558.591		1322.65	0.0271661	814.983
1261.43	0.0183611	550.833		1323.38	0.0282432	847.296
1262.16	0.0175206	525.618		1324.11	0.027585	827.55
1262.9	0.0182318	546.954		1324.83	0.0272259	816.777
1263.63	0.018652	559.56		1325.56	0.0278842	836.526
1264.36	0.0179732	539.196		1326.29	0.028303	849.09
1265.1	0.0176822	530.466		1327.02	0.0281235	843.705
1265.83	0.0183934	551.802		1327.74	0.0277046	831.138
1266.57	0.0186843	560.529		1328.47	0.0274055	822.165
1267.3	0.0183288	549.864		1329.2	0.027585	827.55
1268.03	0.0192662	577.986		1329.92	0.0278243	834.729
1268.77	0.0182641	547.923		1330.65	0.0289612	868.836
1269.5	0.0184581	553.743		1331.38	0.0269866	809.598
1270.23	0.0179732	539.196		1332.11	0.0289014	867.042
1270.96	0.0183288	549.864		1332.83	0.0284227	852.681
1271.7	0.0181995	545.985		1333.56	0.0275251	825.753
1272.43	0.0183288	549.864		1334.29	0.0288416	865.248
1273.16	0.0183288	549.864		1335.01	0.0289612	868.836
1273.9	0.0183288	549.864		1335.74	0.0274653	823.959
1274.63	0.0180701	542.103		1336.46	0.0284825	854.475
1275.36	0.0178439	535.317		1337.19	0.0291407	874.221
1276.09	0.0184904	554.712		1337.92	0.0282432	847.296
1276.83	0.0182318	546.954		1338.64	0.0274055	822.165
1277.56	0.0188136	564.408		1339.37	0.0282432	847.296
1278.29	0.0187167	561.501		1340.1	0.0285424	856.272
1279.02	0.0195895	587.685		1340.82	0.028662	859.86
1279.76	0.0181995	545.985		1341.55	0.0297391	892.173
1280.49	0.0183611	550.833		1342.27	0.028662	859.86
1281.22	0.0184904	554.712		1343	0.0285424	856.272
1281.95	0.0181348	544.044		1343.72	0.0298588	895.764
1282.68	0.0186843	560.529		1344.45	0.0274653	823.959
1283.42	0.0178439	535.317		1345.18	0.027944	838.32
1284.15	0.0176176	528.528		1345.9	0.0286022	858.066
1284.88	0.0175206	525.618		1346.63	0.0285424	856.272
1285.61	0.0193955	581.865		1347.35	0.0292006	876.018
1286.34	0.018749	562.47		1348.08	0.0298588	895.764
1287.07	0.0183611	550.833		1348.8	0.028662	859.86
1287.8	0.0182318	546.954		1349.53	0.0290211	870.633
1288.54	0.0187167	561.501		1350.25	0.030158	904.74
1289.27	0.0179408	538.224		1350.98	0.0296194	888.582
1290	0.018749	562.47		1351.7	0.0299785	899.355
1290.73	0.0188783	566.349		1352.43	0.0297989	893.967
1291.46	0.0191369	574.107		1353.15	0.028303	849.09
1292.19	0.0181025	543.075		1353.88	0.0287219	861.657
1292.92	0.0176176	528.528		1354.6	0.0286022	858.066
1293.65	0.0187167	561.501		1355.32	0.0296793	890.379
1294.38	0.0178115	534.345		1356.05	0.0290211	870.633
1295.11	0.0182318	546.954		1356.77	0.0294998	884.994
1295.84	0.0193955	581.865		1357.5	0.0289014	867.042
1296.57	0.0181025	543.075		1358.22	0.0299785	899.355
1297.31	0.0184904	554.712		1358.95	0.0302178	906.534
1298.04	0.0185874	557.622		1359.67	0.0287817	863.451
1298.77	0.0183611	550.833		1360.39	0.0290211	870.633
1299.5	0.0186843	560.529		1361.12	0.0295596	886.788
1300.23	0.0185227	555.681		1361.84	0.0296194	888.582
1300.96	0.0190076	570.228		1362.57	0.028662	859.86
1301.69	0.0190076	570.228		1363.29	0.0293202	879.606
1302.42	0.0184581	553.743		1364.01	0.0292006	876.018
1303.15	0.0190076	570.228		1364.74	0.0294399	883.197
1303.88	0.0179085	537.255		1365.46	0.0290809	872.427
1304.61	0.0183611	550.833		1366.18	0.0293801	881.403
1305.33	0.018652	559.56		1366.91	0.030517	915.51
1306.06	0.0182641	547.923		1367.63	0.0300383	901.149
1306.79	0.018555	556.65		1368.35	0.030158	904.74
1307.52	0.0182318	546.954		1369.08	0.0287219	861.657
1308.25	0.0191046	573.138		1369.8	0.0314146	942.438
1308.98	0.0188136	564.408		1370.52	0.0293202	879.606
1309.71	0.0182641	547.923		1371.25	0.0304572	913.716
1310.44	0.0184257	552.771		1371.97	0.0290809	872.427
1311.17	0.0184904	554.712		1372.69	0.0285424	856.272
1311.9	0.0181348	544.044		1373.41	0.0290809	872.427
1312.63	0.0190722	572.166		1374.14	0.0303973	911.919
1313.36	0.0186843	560.529		1374.86	0.0299186	897.558
1314.08	0.0183934	551.802		1375.58	0.031235	937.05
1314.81	0.0181348	544.044		1376.3	0.0295596	886.788
1315.54	0.0186843	560.529
1316.27	0.0195895	587.685
1317	0.0185874	557.622
1317.73	0.0184581	553.743
1318.45	0.0181025	543.075
1319.18	0.0165508	496.524
1319.91	0.0194602	583.806
1320.64	0.0181025	543.075
1321.37	0.0191692	575.076
1322.1	0.0189429	568.287
1322.82	0.0191692	575.076
1323.55	0.0190076	570.228
1324.28	0.0186197	558.591
1325.01	0.0182318	546.954
1325.73	0.0192339	577.017
1326.46	0.0175853	527.559
1327.19	0.0182318	546.954
1327.92	0.0190722	572.166
1328.64	0.0192016	576.048
1329.37	0.0179085	537.255
1330.1	0.0178762	536.286
1330.82	0.018846	565.38
1331.55	0.0178115	534.345
1332.28	0.0184257	552.771
1333.01	0.0193309	579.927
1333.73	0.0193632	580.896
1334.46	0.0181671	545.013
1335.19	0.0184904	554.712
1335.91	0.0186197	558.591
1336.64	0.0196218	588.654
1337.36	0.0190722	572.166
1338.09	0.0191046	573.138
1338.82	0.0186197	558.591
1339.54	0.0183288	549.864
1340.27	0.0187813	563.439
1341	0.0184904	554.712
1341.72	0.0176176	528.528
1342.45	0.0195895	587.685
1343.17	0.0194602	583.806
1343.9	0.018846	565.38
1344.62	0.018846	565.38
1345.35	0.0192662	577.986
1346.08	0.018749	562.47
1346.8	0.0186197	558.591
1347.53	0.0189753	569.259
1348.25	0.0189429	568.287
1348.98	0.0175206	525.618
1349.7	0.0189753	569.259
1350.43	0.0192339	577.017
1351.15	0.0186843	560.529
1351.88	0.0202037	606.111
1352.6	0.0193955	581.865
1353.33	0.0193955	581.865
1354.05	0.0187813	563.439
1354.78	0.0199127	597.381
1355.5	0.018749	562.47
1356.22	0.0190076	570.228
1356.95	0.0188783	566.349
1357.67	0.0185874	557.622
1358.4	0.0199774	599.322
1359.12	0.0191369	574.107
1359.85	0.0190399	571.197
1360.57	0.0189106	567.318
1361.29	0.0186843	560.529
1362.02	0.0190722	572.166
1362.74	0.0189429	568.287
1363.47	0.0188136	564.408
1364.19	0.0186197	558.591
1364.91	0.018555	556.65
1365.64	0.0182641	547.923
1366.36	0.0191692	575.076
1367.08	0.0181025	543.075
1367.81	0.0180055	540.165
1368.53	0.0183288	549.864
1369.25	0.0182641	547.923
1369.98	0.0188136	564.408
1370.7	0.0182964	548.892
1371.42	0.0178439	535.317
1372.15	0.0177469	532.407
1372.87	0.0180378	541.134
1373.59	0.0190399	571.197
1374.31	0.0185227	555.681
1375.04	0.0183934	551.802
1375.76	0.0182964	548.892
1376.48	0.0183288	549.864
1377.2	0.0179408	538.224

## Sheet: Raman Polovinnaya
POL-11				POL-4			POL-13			POL-27			POL-14			POL-16			POL-18			POL-21			POL-23			POL-25			POL-28			POL-29			POL-2			POL-3			POL-3 matrix?			POL-5			POL-7
raman shift (cm-1)	Intensity (AU)	nomalised		raman shift (cm-1)	Intensity (AU)		raman shift (cm-1)	Intensity (AU)		raman shift (cm-1)	Intensity (AU)		raman shift (cm-1)	Intensity (AU)		raman shift (cm-1)	Intensity (AU)		raman shift (cm-1)	Intensity (AU)		raman shift (cm-1)	Intensity (AU)		raman shift (cm-1)	Intensity (AU)		raman shift (cm-1)	Intensity (AU)		raman shift (cm-1)	Intensity (AU)		raman shift (cm-1)	Intensity (AU)		raman shift (cm-1)	Intensity (AU)		raman shift (cm-1)	Intensity (AU)		raman shift (cm-1)	Intensity (AU)		raman shift (cm-1)	Intensity (AU)		raman shift (cm-1)
169.646	7962.26	0.431676		169.646	6975.52		169.646	4432.92		169.646	7240.25		169.646	6074.23		169.646	8490.55		169.646	5892.62		169.646	12342.3		169.646	8602.14		169.646	3808.4		169.646	9767.8		169.646	8615.32		169.646	6074.53		169.646	7169.88		169.646	3491.02		169.646	8100.39		169.646
171.598	7914.01	0.42906		171.598	6970.23		171.598	4465.08		171.598	7219.2		171.598	6067.85		171.598	8329.48		171.598	5900.79		171.598	12331.8		171.598	8593.42		171.598	3798.92		171.598	9794.13		171.598	8633.92		171.598	6052.75		171.598	7135.26		171.598	3484.95		171.598	8112.09		171.598
173.553	7984.51	0.432883		173.553	7021.23		173.553	4492.71		173.553	7253.92		173.553	6132.73		173.553	8270.48		173.553	5935.16		173.553	12424.8		173.553	8675.71		173.553	3850.28		173.553	9820.67		173.553	8640.62		173.553	6115.73		173.553	7191.32		173.553	3490.71		173.553	8158.32		173.553
175.507	8090.76	0.438643		175.507	7090.95		175.507	4529.58		175.507	7278.34		175.507	6249.98		175.507	8232.41		175.507	6052.57		175.507	12496.2		175.507	8773.05		175.507	3871.42		175.507	9907.02		175.507	8707.65		175.507	6167.36		175.507	7250.88		175.507	3489.88		175.507	8262.53		175.507
177.46	8202.38	0.444695		177.46	7190.95		177.46	4582.42		177.46	7356.4		177.46	6378.85		177.46	8165.06		177.46	6198.65		177.46	12647.2		177.46	8862.28		177.46	3898.2		177.46	9977.15		177.46	8789.45		177.46	6226.41		177.46	7389.51		177.46	3531.1		177.46	8357.47		177.46
179.414	8302.35	0.450115		179.414	7278		179.414	4557.56		179.414	7413.35		179.414	6434.23		179.414	8171.21		179.414	6251.32		179.414	12661.2		179.414	8884.28		179.414	3910.42		179.414	10013.9		179.414	8810.82		179.414	6225.88		179.414	7401.01		179.414	3534.3		179.414	8404.38		179.414
181.367	8286.31	0.449245		181.367	7251.23		181.367	4573.91		181.367	7383.75		181.367	6422.6		181.367	8147.41		181.367	6221.15		181.367	12631		181.367	8954.28		181.367	3909.54		181.367	10001.9		181.367	8857.02		181.367	6209.92		181.367	7401.38		181.367	3533.25		181.367	8369.81		181.367
183.319	8219.63	0.44563		183.319	7204.66		183.319	4543.5		183.319	7383.47		183.319	6300.6		183.319	8111.98		183.319	6106.75		183.319	12603.3		183.319	8862.44		183.319	3911.69		183.319	9992.09		183.319	8848.12		183.319	6194.75		183.319	7364.38		183.319	3540.88		183.319	8355.23		183.319
185.269	8219.56	0.445626		185.269	7242.09		185.269	4574.37		185.269	7437.06		185.269	6377.48		185.269	8130.41		185.269	6152.08		185.269	12651.2		185.269	8913.71		185.269	3926.92		185.269	10110.6		185.269	8932.52		185.269	6232.86		185.269	7386.51		185.269	3547.28		185.269	8426.15		185.269
187.22	8332.19	0.451732		187.22	7303.8		187.22	4624.4		187.22	7511.54		187.22	6407.48		187.22	8146.69		187.22	6167.32		187.22	12770.9		187.22	8981.42		187.22	3958.44		187.22	10148		187.22	8989.25		187.22	6272.7		187.22	7375.51		187.22	3534.44		187.22	8530.94		187.22
189.172	8389.13	0.45482		189.172	7352.52		189.172	4641.23		189.172	7538.98		189.172	6465.48		189.172	8127.41		189.172	6258.15		189.172	12793.2		189.172	9040.73		189.172	3952.19		189.172	10245.5		189.172	9125.55		189.172	6298.29		189.172	7463.63		189.172	3551.54		189.172	8573.32		189.172
191.123	8379.72	0.454309		191.123	7417.02		191.123	4641.42		191.123	7599.85		191.123	6489.35		191.123	8184.76		191.123	6253.01		191.123	12841.3		191.123	9073.42		191.123	3989.87		191.123	10252.6		191.123	9142.22		191.123	6335.07		191.123	7502.88		191.123	3567.99		191.123	8609.04		191.123
193.073	8461.63	0.45875		193.073	7441.18		193.073	4705.16		193.073	7627.25		193.073	6511.1		193.073	8248.18		193.073	6258.54		193.073	12924		193.073	9203.42		193.073	4008.26		193.073	10341.4		193.073	9171.92		193.073	6350.43		193.073	7539.88		193.073	3603.82		193.073	8624.03		193.073
195.021	8439.69	0.45756		195.021	7431.23		195.021	4748.26		195.021	7623.61		195.021	6515.23		195.021	8265.48		195.021	6299.05		195.021	13020.1		195.021	9185.14		195.021	4039.83		195.021	10369.2		195.021	9170.35		195.021	6428.87		195.021	7546.38		195.021	3630.66		195.021	8625.04		195.021
196.97	8494.01	0.460505		196.97	7488.95		196.97	4871.69		196.97	7687.25		196.97	6601.98		196.97	8341.55		196.97	6360.36		196.97	13118.6		196.97	9241		196.97	4051.76		196.97	10473.5		196.97	9199.17		196.97	6477.54		196.97	7639.63		196.97	3642.36		196.97	8689.89		196.97
198.92	8709.26	0.472175		198.92	7606.8		198.92	5026.59		198.92	7756.11		198.92	6810.35		198.92	8378.91		198.92	6521.9		198.92	13378.5		198.92	9438.14		198.92	4124.54		198.92	10583		198.92	9263.62		198.92	6670.06		198.92	7736.17		198.92	3653.23		198.92	8829.76		198.92
200.869	9076.63	0.492093		200.869	7820.09		200.869	5189.8		200.869	7877.24		200.869	7226.1		200.869	8449.19		200.869	6916.79		200.869	13796.7		200.869	9718.28		200.869	4234.84		200.869	10813.6		200.869	9350.29		200.869	6887.07		200.869	7971.26		200.869	3674.79		200.869	9145.02		200.869
202.817	9563.26	0.518475		202.817	8164.52		202.817	5293.91		202.817	7995.61		202.817	7666.24		202.817	8543.62		202.817	7384.1		202.817	14244		202.817	10020.9		202.817	4385.42		202.817	11084.7		202.817	9493.12		202.817	7001.73		202.817	8325.13		202.817	3722.81		202.817	9523.41		202.817
204.763	9936.26	0.538697		204.763	8500.8		204.763	5257.04		204.763	8182.63		204.763	7940.6		204.763	8608.41		204.763	7721.08		204.763	14464.8		204.763	10239.7		204.763	4462.46		204.763	11272.5		204.763	9687.22		204.763	7016.61		204.763	8635.26		204.763	3733.94		204.763	9777.09		204.763
206.711	9934.81	0.538619		206.711	8589.37		206.711	5144.36		206.711	8217.67		206.711	7847.98		206.711	8682.26		206.711	7710.1		206.711	14372.9		206.711	10290.4		206.711	4472.06		206.711	11373.6		206.711	9788.62		206.711	6958.3		206.711	8665.63		206.711	3745.53		206.711	9715.2		206.711
208.658	9572.01	0.518949		208.658	8379.94		208.658	5036.04		208.658	8136.11		208.658	7545.6		208.658	8635.78		208.658	7318.26		208.658	14050.7		208.658	10079		208.658	4368.15		208.658	11157.4		208.658	9739.24		208.658	6800.76		208.658	8512.01		208.658	3787.61		208.658	9528.05		208.658
210.605	9295.01	0.503932		210.605	8165.66		210.605	4944.75		210.605	8073.48		210.605	7303.1		210.605	8603.48		210.605	7001.44		210.605	13848.7		210.605	9916		210.605	4320.94		210.605	11040.6		210.605	9764.75		210.605	6755.01		210.605	8308.01		210.605	3770.77		210.605	9396.27		210.605
212.549	9112.19	0.49402		212.549	8025.37		212.549	4922.41		212.549	8030.32		212.549	7114.98		212.549	8536.55		212.549	6826.22		212.549	13697		212.549	9787.85		212.549	4252.91		212.549	10983.9		212.549	9715.87		212.549	6714.75		212.549	8138.38		212.549	3769.56		212.549	9316.37		212.549
214.495	9046.56	0.490462		214.495	8012.37		214.495	4895.59		214.495	8077.04		214.495	7001.48		214.495	8547.33		214.495	6708.94		214.495	13637.6		214.495	9759.01		214.495	4274.83		214.495	10950		214.495	9740.55		214.495	6674.95		214.495	8104.38		214.495	3791.76		214.495	9223.53		214.495
216.441	9001.63	0.488026		216.441	7906.52		216.441	4856.04		216.441	8076.13		216.441	6934.98		216.441	8527.41		216.441	6634.75		216.441	13563.3		216.441	9670.23		216.441	4264.72		216.441	10947.7		216.441	9743.92		216.441	6696.44		216.441	8037.38		216.441	3802.58		216.441	9159.4		216.441
218.384	8857.63	0.480219		218.384	7828.95		218.384	4843.61		218.384	8003.57		218.384	6768.48		218.384	8543.69		218.384	6544.93		218.384	13497.2		218.384	9576.57		218.384	4245.38		218.384	10888.5		218.384	9678.55		218.384	6599.96		218.384	7971.8		218.384	3782.13		218.384	9097.98		218.384
220.329	8789.88	0.476546		220.329	7814.95		220.329	4822.88		220.329	8029.19		220.329	6695.85		220.329	8522.83		220.329	6466.9		220.329	13473.5		220.329	9492.19		220.329	4222.69		220.329	10886.8		220.329	9626.27		220.329	6611.4		220.329	7965.76		220.329	3812.88		220.329	9019.17		220.329
222.274	8778.38	0.475923		222.274	7756.8		222.274	4818.14		222.274	8049.48		222.274	6665.85		222.274	8528.33		222.274	6447.57		222.274	13458.5		222.274	9567.14		222.274	4240		222.274	10889.4		222.274	9668.74		222.274	6636.98		222.274	7937.63		222.274	3808.15		222.274	8983.8		222.274
224.218	8744.03	0.47406		224.218	7797		224.218	4787.31		224.218	8028.49		224.218	6585.98		224.218	8473.69		224.218	6415.05		224.218	13468		224.218	9491.57		224.218	4200.89		224.218	10908.3		224.218	9669.85		224.218	6573.55		224.218	7879.57		224.218	3810.97		224.218	8997.1		224.218
226.159	8718.26	0.472663		226.159	7788.8		226.159	4834.57		226.159	8021.7		226.159	6622.23		226.159	8511.12		226.159	6418.02		226.159	13475.9		226.159	9510.42		226.159	4230.11		226.159	10926.5		226.159	9675.27		226.159	6615.55		226.159	7905.69		226.159	3838.2		226.159	8954.45		226.159
228.103	8745.31	0.47413		228.103	7816.95		228.103	4811.12		228.103	8055.94		228.103	6635.44		228.103	8539.21		228.103	6408		228.103	13465.4		228.103	9526.42		228.103	4240.9		228.103	10912.1		228.103	9719.92		228.103	6614.91		228.103	7927.62		228.103	3857.25		228.103	8987.94		228.103
230.046	8773.63	0.475665		230.046	7777.66		230.046	4831.08		230.046	8062.47		230.046	6609.73		230.046	8541.64		230.046	6427.07		230.046	13469.1		230.046	9493.57		230.046	4261.98		230.046	10997.8		230.046	9733.17		230.046	6609.82		230.046	7961.19		230.046	3842.36		230.046	9000.88		230.046
231.986	8775.51	0.475767		231.986	7791.43		231.986	4827.8		231.986	8082.97		231.986	6608.48		231.986	8558.98		231.986	6423.61		231.986	13493.6		231.986	9565.35		231.986	4278.06		231.986	11028.3		231.986	9760.82		231.986	6623.31		231.986	7935.76		231.986	3851.47		231.986	8987.92		231.986
233.928	8771.76	0.475564		233.928	7778.37		233.928	4807.73		233.928	8077.32		233.928	6602.73		233.928	8573.05		233.928	6427.22		233.928	13516.3		233.928	9524.87		233.928	4241.44		233.928	10980.6		233.928	9774.1		233.928	6635.09		233.928	7944.38		233.928	3868.24		233.928	9000.75		233.928
235.87	8758.76	0.474859		235.87	7781.52		235.87	4843.23		235.87	8101.24		235.87	6630.85		235.87	8539.76		235.87	6447.43		235.87	13532.1		235.87	9550.42		235.87	4275.12		235.87	11069.5		235.87	9739.24		235.87	6643.15		235.87	7978.48		235.87	3856.87		235.87	9019.95		235.87
237.809	8860.88	0.480396		237.809	7848.52		237.809	4846.41		237.809	8142.85		237.809	6648.35		237.809	8611.97		237.809	6485.36		237.809	13610.3		237.809	9646.14		237.809	4309.4		237.809	11008.6		237.809	9830.02		237.809	6652.92		237.809	8012.38		237.809	3875.45		237.809	9052.73		237.809
239.75	8881.38	0.481507		239.75	7854.52		239.75	4867.02		239.75	8140.85		239.75	6679.98		239.75	8618.76		239.75	6527.26		239.75	13570.7		239.75	9653.58		239.75	4287.36		239.75	11102.5		239.75	9877.92		239.75	6685.39		239.75	8017.88		239.75	3905.28		239.75	9065.75		239.75
241.691	8918.13	0.483499		241.691	7909.31		241.691	4918.09		241.691	8193.13		241.691	6746.6		241.691	8628.85		241.691	6571.9		241.691	13688.7		241.691	9704.14		241.691	4334.97		241.691	11101.5		241.691	9918.65		241.691	6723.78		241.691	8042.94		241.691	3878.2		241.691	9142.69		241.691
243.629	8943.13	0.484855		243.629	7912.8		243.629	4909.94		243.629	8230.36		243.629	6739.85		243.629	8639.55		243.629	6616.15		243.629	13778.4		243.629	9686.42		243.629	4331.92		243.629	11210.3		243.629	9951.35		243.629	6758.45		243.629	8103.13		243.629	3894.03		243.629	9176.32		243.629
245.569	9024.51	0.489267		245.569	7979.8		245.569	4963.84		245.569	8221.38		245.569	6793.6		245.569	8681.26		245.569	6661.29		245.569	13762.9		245.569	9755		245.569	4352.63		245.569	11243		245.569	9959.62		245.569	6794.51		245.569	8175.94		245.569	3902.68		245.569	9219.58		245.569
247.506	9029.51	0.489538		247.506	8044.8		247.506	4964.35		247.506	8252.84		247.506	6831.23		247.506	8715.76		247.506	6667.61		247.506	13793.6		247.506	9801.87		247.506	4355.78		247.506	11274.8		247.506	9964.42		247.506	6757.93		247.506	8194.94		247.506	3934.92		247.506	9260.33		247.506
249.445	9021.13	0.489084		249.445	8048.52		249.445	4943.96		249.445	8251.21		249.445	6834.35		249.445	8739.04		249.445	6655.5		249.445	13843.2		249.445	9833		249.445	4388.55		249.445	11300.3		249.445	9984.42		249.445	6777.33		249.445	8166.76		249.445	3952.01		249.445	9257.49		249.445
251.383	8970.76	0.486352		251.383	8040.66		251.383	4957.3		251.383	8243.92		251.383	6830.57		251.383	8674.91		251.383	6632.94		251.383	13775.9		251.383	9774.01		251.383	4337.61		251.383	11303.9		251.383	9987.42		251.383	6738.52		251.383	8165.06		251.383	3920.97		251.383	9238.68		251.383
253.319	9025.19	0.489303		253.319	7992.23		253.319	4950.52		253.319	8280.81		253.319	6839.07		253.319	8735.26		253.319	6663		253.319	13818.3		253.319	9776.62		253.319	4373.7		253.319	11285		253.319	10014.2		253.319	6793.87		253.319	8200.32		253.319	3941.92		253.319	9275.4		253.319
255.257	9050.76	0.49069		255.257	8005.09		255.257	4961.93		255.257	8279.99		255.257	6803.48		255.257	8719.05		255.257	6661.82		255.257	13828.7		255.257	9799.28		255.257	4383		255.257	11361.8		255.257	10006.4		255.257	6791.24		255.257	8199.26		255.257	3955.21		255.257	9266.52		255.257
257.195	9071.51	0.491815		257.195	8051.94		257.195	4956.48		257.195	8304.42		257.195	6842.6		257.195	8713.55		257.195	6690.22		257.195	13848.7		257.195	9813.28		257.195	4402.36		257.195	11353.2		257.195	10078.9		257.195	6811.58		257.195	8208		257.195	3941.91		257.195	9294.29		257.195
259.13	9069.26	0.491693		259.13	8089.8		259.13	4957.13		259.13	8311.28		259.13	6840.48		259.13	8795.19		259.13	6688.97		259.13	13875.7		259.13	9821.28		259.13	4388.11		259.13	11330.2		259.13	10098.7		259.13	6795.75		259.13	8231.65		259.13	3956.9		259.13	9270.16		259.13
261.066	9064.51	0.491435		261.066	8064.94		261.066	4989.57		261.066	8325.75		261.066	6873.35		261.066	8744.84		261.066	6685.94		261.066	13868.5		261.066	9850.01		261.066	4376.49		261.066	11310		261.066	10096.5		261.066	6789.23		261.066	8279.69		261.066	3966.13		261.066	9301.02		261.066
263	9064.44	0.491431		263	8056.8		263	4979.71		263	8321.93		263	6888.1		263	8789.69		263	6708.05		263	13877.3		263	9883		263	4398.85		263	11375.5		263	10125.1		263	6821.05		263	8272.07		263	3965.31		263	9340.35		263
264.936	9106.01	0.493685		264.936	8127.94		264.936	4978.73		264.936	8344.48		264.936	6861.1		264.936	8776.12		264.936	6669.71		264.936	13893.1		264.936	9892.99		264.936	4423.67		264.936	11392.2		264.936	10175.8		264.936	6831.57		264.936	8226.22		264.936	3966.69		264.936	9326.45		264.936
266.87	9122.97	0.494605		266.87	8086.37		266.87	4972.98		266.87	8360.18		266.87	6868.98		266.87	8787.19		266.87	6720.36		266.87	13888.5		266.87	9919.57		266.87	4400.78		266.87	11408.6		266.87	10210.7		266.87	6836.75		266.87	8233.88		266.87	3955.26		266.87	9347.88		266.87
268.805	9144.81	0.495789		268.805	8140.52		268.805	4962.91		268.805	8337.93		268.805	6900.78		268.805	8780.9		268.805	6729		268.805	13912.3		268.805	9925.85		268.805	4402.26		268.805	11359.4		268.805	10139.1		268.805	6842.95		268.805	8290.69		268.805	3968.57		268.805	9371.49		268.805
270.74	9153.51	0.49626		270.74	8190.37		270.74	4978.41		270.74	8395.92		270.74	6919.44		270.74	8798.26		270.74	6728.43		270.74	13947.3		270.74	9905.33		270.74	4431.18		270.74	11469.4		270.74	10245.4		270.74	6845.39		270.74	8301.38		270.74	3957.15		270.74	9413.56		270.74
272.672	9142.18	0.495646		272.672	8175.94		272.672	5006.38		272.672	8412.68		272.672	6954.1		272.672	8822.33		272.672	6724.47		272.672	13903.4		272.672	9951.41		272.672	4425.28		272.672	11464.9		272.672	10295.6		272.672	6818.81		272.672	8219.38		272.672	3977.14		272.672	9370.38		272.672
274.606	9126.44	0.494793		274.606	8163.52		274.606	4970.78		274.606	8392.32		274.606	6883.48		274.606	8830.33		274.606	6738.4		274.606	13919.7		274.606	9908.85		274.606	4404.9		274.606	11403.7		274.606	10331.9		274.606	6828.92		274.606	8317.25		274.606	3970.05		274.606	9389.78		274.606
276.537	9118.26	0.494349		276.537	8068.52		276.537	4961.49		276.537	8373.78		276.537	6878.98		276.537	8805.68		276.537	6677.83		276.537	13848.6		276.537	9882.85		276.537	4437.86		276.537	11453.7		276.537	10337.9		276.537	6814.46		276.537	8261.13		276.537	3965.6		276.537	9388.08		276.537
278.47	9130.63	0.49502		278.47	8124.37		278.47	4966.44		278.47	8386.82		278.47	6868.1		278.47	8790.84		278.47	6693.57		278.47	13896.3		278.47	9911.23		278.47	4436.05		278.47	11512.2		278.47	10334.5		278.47	6834.55		278.47	8263.01		278.47	3978.85		278.47	9388.23		278.47
280.401	9110.56	0.493932		280.401	8117.37		280.401	4983.59		280.401	8378.92		280.401	6893.98		280.401	8816.05		280.401	6710.32		280.401	13910.8		280.401	9900.57		280.401	4415.33		280.401	11489.1		280.401	10363.9		280.401	6827.8		280.401	8318.51		280.401	4001.57		280.401	9364.87		280.401
282.333	9133.31	0.495165		282.333	8147.94		282.333	4990.06		282.333	8409.33		282.333	6897.73		282.333	8812.83		282.333	6696.18		282.333	13928.5		282.333	9891.71		282.333	4439.43		282.333	11521.8		282.333	10426.2		282.333	6818.68		282.333	8327		282.333	4002.37		282.333	9398.02		282.333
284.263	9120.76	0.494485		284.263	8162.94		284.263	4963.09		284.263	8397.26		284.263	6877.48		284.263	8831.5		284.263	6705.15		284.263	13900.1		284.263	9933		284.263	4441.39		284.263	11474		284.263	10415.2		284.263	6826.45		284.263	8269.26		284.263	3999.34		284.263	9388.12		284.263
286.195	9108.76	0.493834		286.195	8193.8		286.195	4970.44		286.195	8390.4		286.195	6831.69		286.195	8829.26		286.195	6712.57		286.195	13982.1		286.195	9933		286.195	4429.61		286.195	11512.2		286.195	10359.3		286.195	6796.62		286.195	8262.06		286.195	3978.17		286.195	9400.52		286.195
288.124	9151.94	0.496175		288.124	8123.31		288.124	4967		288.124	8373.6		288.124	6840.35		288.124	8849.9		288.124	6677.32		288.124	13884.6		288.124	9894.14		288.124	4429.45		288.124	11488.6		288.124	10329.6		288.124	6795.28		288.124	8327.26		288.124	3969.82		288.124	9387.23		288.124
290.054	9055.51	0.490947		290.054	8153.57		290.054	4950.37		290.054	8371.04		290.054	6798.03		290.054	8859.48		290.054	6668.29		290.054	13891.1		290.054	9862.08		290.054	4416.19		290.054	11512.4		290.054	10294.6		290.054	6803.58		290.054	8290.63		290.054	4001.9		290.054	9337.6		290.054
291.983	9043.26	0.490283		291.983	8087.52		291.983	4925.55		291.983	8394.89		291.983	6817.98		291.983	8820.76		291.983	6645.15		291.983	13851.4		291.983	9824.65		291.983	4428.44		291.983	11457.9		291.983	10283.5		291.983	6816.75		291.983	8257.75		291.983	4009.21		291.983	9310.05		291.983
293.913	9078.31	0.492184		293.913	8107.94		293.913	4927.12		293.913	8390.76		293.913	6835.07		293.913	8830.57		293.913	6630.54		293.913	13909.9		293.913	9903.37		293.913	4433.76		293.913	11537.1		293.913	10257		293.913	6826.99		293.913	8313.69		293.913	3992.11		293.913	9353.11		293.913
295.84	9124.01	0.494661		295.84	8115.09		295.84	4941.41		295.84	8404		295.84	6818.48		295.84	8870.63		295.84	6650.95		295.84	13921.2		295.84	9895.14		295.84	4423.49		295.84	11538.2		295.84	10277.7		295.84	6815.08		295.84	8300.44		295.84	4005.49		295.84	9363.53		295.84
297.769	9072.51	0.491869		297.769	8096.23		297.769	4970.98		297.769	8406.68		297.769	6811.73		297.769	8844.28		297.769	6679.57		297.769	13875.2		297.769	9865.28		297.769	4437.83		297.769	11511.8		297.769	10248.5		297.769	6804.23		297.769	8274.38		297.769	4026.62		297.769	9349.68		297.769
299.696	9116.4	0.494249		299.696	8140.23		299.696	4982.02		299.696	8441.89		299.696	6813.48		299.696	8875.19		299.696	6698.51		299.696	13956.6		299.696	9840.08		299.696	4452.62		299.696	11563		299.696	10284.1		299.696	6845.43		299.696	8307.51		299.696	4018.88		299.696	9389		299.696
301.622	9138.47	0.495445		301.622	8148.66		301.622	4977.16		301.622	8470.42		301.622	6838.35		301.622	8896.48		301.622	6661.04		301.622	14005.5		301.622	9935.99		301.622	4459.99		301.622	11623		301.622	10363.7		301.622	6870.94		301.622	8342.25		301.622	4023.63		301.622	9422.32		301.622
303.551	9152.19	0.496189		303.551	8188.66		303.551	4999.54		303.551	8456.9		303.551	6830.48		303.551	8930.99		303.551	6653.54		303.551	14023.6		303.551	9924.42		303.551	4472.58		303.551	11637.5		303.551	10378.4		303.551	6908.43		303.551	8313.13		303.551	4057.97		303.551	9406.68		303.551
305.476	9123.81	0.49465		305.476	8195.23		305.476	5006.55		305.476	8504.07		305.476	6876.85		305.476	8940.19		305.476	6695.08		305.476	14007.1		305.476	9963.42		305.476	4470.41		305.476	11646.7		305.476	10367.1		305.476	6855.12		305.476	8364.05		305.476	4059.47		305.476	9421.78		305.476
307.403	9211.01	0.499378		307.403	8252.37		307.403	4995.31		307.403	8515.2		307.403	6867.23		307.403	8977.55		307.403	6722.96		307.403	14094.2		307.403	10029.6		307.403	4509.13		307.403	11711		307.403	10399.8		307.403	6868		307.403	8359.82		307.403	4087.43		307.403	9506.45		307.403
309.328	9193.81	0.498445		309.328	8240.37		309.328	5027.64		309.328	8524.4		309.328	6890.98		309.328	8954.69		309.328	6750.09		309.328	14087.5		309.328	10042.6		309.328	4491.62		309.328	11763		309.328	10433.9		309.328	6896.28		309.328	8398.19		309.328	4087.38		309.328	9455.89		309.328
311.255	9274.56	0.502823		311.255	8302.94		311.255	5040.94		311.255	8564.75		311.255	6907.98		311.255	8996.55		311.255	6765.15		311.255	14132.8		311.255	10058.2		311.255	4517.98		311.255	11768.2		311.255	10451.2		311.255	6923.52		311.255	8447		311.255	4083.62		311.255	9514.55		311.255
313.179	9230.56	0.500438		313.179	8276.9		313.179	5070.44		313.179	8565.4		313.179	6929.1		313.179	9022.98		313.179	6800.11		313.179	14178		313.179	10088.1		313.179	4547.34		313.179	11802.4		313.179	10497.4		313.179	6946.31		313.179	8461.88		313.179	4122.17		313.179	9554.4		313.179
315.102	9284.7	0.503373		315.102	8316.09		315.102	5073.77		315.102	8629.82		315.102	6996.48		315.102	9061.69		315.102	6789.97		315.102	14208.5		315.102	10111.3		315.102	4551.28		315.102	11854.9		315.102	10578.9		315.102	6976.77		315.102	8449.75		315.102	4110.52		315.102	9605.46		315.102
317.028	9364.94	0.507723		317.028	8318.37		317.028	5091.42		317.028	8664.04		317.028	6966.1		317.028	9102.42		317.028	6845.36		317.028	14276.6		317.028	10115.2		317.028	4570.46		317.028	11901.4		317.028	10570.1		317.028	6977.03		317.028	8522.88		317.028	4139.18		317.028	9617.38		317.028
318.95	9363.63	0.507652		318.95	8361.52		318.95	5096.88		318.95	8644.03		318.95	6994.1		318.95	9119.13		318.95	6853.29		318.95	14280.1		318.95	10171.3		318.95	4580.6		318.95	11921.4		318.95	10596		318.95	7012.85		318.95	8517.57		318.95	4167.58		318.95	9614.1		318.95
320.875	9358.94	0.507398		320.875	8428.43		320.875	5085.5		320.875	8689.03		320.875	7028.85		320.875	9170.2		320.875	6876.16		320.875	14389.4		320.875	10204.1		320.875	4613.48		320.875	11966.5		320.875	10656.5		320.875	7022.02		320.875	8559.06		320.875	4163.77		320.875	9701.39		320.875
322.797	9464.06	0.513097		322.797	8436.09		322.797	5130.33		322.797	8746.32		322.797	7064.98		322.797	9205.98		322.797	6888.28		322.797	14414.2		322.797	10258.7		322.797	4606.98		322.797	12046.5		322.797	10649.9		322.797	7042.59		322.797	8606.75		322.797	4172.02		322.797	9717.32		322.797
324.719	9476.76	0.513785		324.719	8495.03		324.719	5166.74		324.719	8784.69		324.719	7125.44		324.719	9251.26		324.719	6948.54		324.719	14494.7		324.719	10318.7		324.719	4635.35		324.719	12087.4		324.719	10759.8		324.719	7092.03		324.719	8645.44		324.719	4189.41		324.719	9770.45		324.719
326.642	9509.69	0.515571		326.642	8539.86		326.642	5165.31		326.642	8828.68		326.642	7076.85		326.642	9282.76		326.642	6973.01		326.642	14514.3		326.642	10323.5		326.642	4657.25		326.642	12149.9		326.642	10828.7		326.642	7117.66		326.642	8708.5		326.642	4206.59		326.642	9812.04		326.642
328.563	9539.44	0.517184		328.563	8567.66		328.563	5188.38		328.563	8845.04		328.563	7127.6		328.563	9301.27		328.563	6981.29		328.563	14546.8		328.563	10386.7		328.563	4663.35		328.563	12162.1		328.563	10798.2		328.563	7159.92		328.563	8708.63		328.563	4233.99		328.563	9828.79		328.563
330.484	9609.13	0.520962		330.484	8614.52		330.484	5194.94		330.484	8900.92		330.484	7170.85		330.484	9294.15		330.484	6992.79		330.484	14599		330.484	10408.4		330.484	4689.85		330.484	12236.4		330.484	10871.2		330.484	7159.38		330.484	8717.38		330.484	4263.71		330.484	9865.32		330.484
332.406	9609.51	0.520983		332.406	8669.23		332.406	5220.12		332.406	8906.49		332.406	7188.6		332.406	9363.12		332.406	7043.93		332.406	14610.4		332.406	10414.7		332.406	4699.37		332.406	12284.4		332.406	10914.2		332.406	7178.82		332.406	8750.44		332.406	4268.28		332.406	9895.58		332.406
334.326	9558.6	0.518222		334.326	8653.8		334.326	5233.11		334.326	8938.11		334.326	7205.1		334.326	9374.26		334.326	7053.07		334.326	14676.3		334.326	10470		334.326	4720.84		334.326	12302.2		334.326	10934.5		334.326	7194.83		334.326	8798.6		334.326	4243.32		334.326	9936.53		334.326
336.245	9668.72	0.524193		336.245	8718.14		336.245	5247.48		336.245	8966.03		336.245	7242.1		336.245	9450.33		336.245	7086.37		336.245	14730.2		336.245	10516.9		336.245	4740.56		336.245	12401.2		336.245	11012.2		336.245	7214.55		336.245	8835.44		336.245	4292.95		336.245	9986.74		336.245
338.166	9755.38	0.528891		338.166	8753.37		338.166	5240.56		338.166	9039.32		338.166	7285.35		338.166	9467.55		338.166	7101.79		338.166	14792.1		338.166	10563		338.166	4771.26		338.166	12399.4		338.166	11024.6		338.166	7260.06		338.166	8890.19		338.166	4296		338.166	9966.61		338.166
340.085	9766.13	0.529474		340.085	8815.52		340.085	5335.05		340.085	9055.75		340.085	7338.98		340.085	9520.62		340.085	7131.98		340.085	14853.2		340.085	10640.4		340.085	4793.01		340.085	12478.5		340.085	11080.2		340.085	7294.41		340.085	8923.69		340.085	4336.95		340.085	10090.4		340.085
342.003	9822.13	0.53251		342.003	8812.37		342.003	5324.7		342.003	9099.68		342.003	7298.9		342.003	9534.48		342.003	7140.36		342.003	14904.6		342.003	10668.2		342.003	4816.38		342.003	12484.6		342.003	11138.4		342.003	7309.73		342.003	8941.69		342.003	4343.31		342.003	10101.2		342.003
343.923	9839.01	0.533425		343.923	8815.94		343.923	5328.7		343.923	9109.9		343.923	7348.9		343.923	9532.05		343.923	7148.65		343.923	14930.4		343.923	10726.1		343.923	4811.11		343.923	12555		343.923	11148.1		343.923	7333.58		343.923	8914.88		343.923	4327.88		343.923	10085		343.923
345.84	9848.38	0.533933		345.84	8923.95		345.84	5314.96		345.84	9154.4		345.84	7328.53		345.84	9574.07		345.84	7187.33		345.84	14991.2		345.84	10718.7		345.84	4832.78		345.84	12635.5		345.84	11205.9		345.84	7385.33		345.84	9011.8		345.84	4361.18		345.84	10159.8		345.84
347.757	9861.06	0.534621		347.757	8892.09		347.757	5368.12		347.757	9143.45		347.757	7369.48		347.757	9566.12		347.757	7211.9		347.757	15008.2		347.757	10713.7		347.757	4838.61		347.757	12599.1		347.757	11260		347.757	7352		347.757	8998.13		347.757	4371		347.757	10179.9		347.757
349.676	9928.81	0.538294		349.676	8889.23		349.676	5339.77		349.676	9200.13		349.676	7372.35		349.676	9643.99		349.676	7243.72		349.676	15073.6		349.676	10779.2		349.676	4845.05		349.676	12647.1		349.676	11227.4		349.676	7408.66		349.676	9056.44		349.676	4384.63		349.676	10212.4		349.676
351.592	9918.88	0.537755		351.592	8903.66		351.592	5380.34		351.592	9191.06		351.592	7401.15		351.592	9700.14		351.592	7271.76		351.592	15050.5		351.592	10748.3		351.592	4858.3		351.592	12665.5		351.592	11292.1		351.592	7401.06		351.592	9109.13		351.592	4385.06		351.592	10221.5		351.592
353.508	9956.76	0.539809		353.508	8968.94		353.508	5388.86		353.508	9244.12		353.508	7460.73		353.508	9751.99		353.508	7286		353.508	15116.2		353.508	10857.9		353.508	4856.73		353.508	12715.6		353.508	11343.4		353.508	7443.58		353.508	9068.88		353.508	4418.85		353.508	10237.5		353.508
355.426	9977.63	0.540941		355.426	8931.09		355.426	5398.15		355.426	9255.47		355.426	7436.98		355.426	9738.28		355.426	7274.36		355.426	15102.4		355.426	10865.3		355.426	4891.91		355.426	12735.7		355.426	11298		355.426	7446.87		355.426	9046.88		355.426	4410.95		355.426	10252.2		355.426
357.341	9987.94	0.541499		357.341	8975.94		357.341	5398.45		357.341	9211.67		357.341	7455.85		357.341	9733.91		357.341	7263.46		357.341	15162.5		357.341	10836.1		357.341	4876.13		357.341	12755.7		357.341	11342.3		357.341	7441.56		357.341	9113.75		357.341	4388.06		357.341	10268.5		357.341
359.256	10006.6	0.542509		359.256	9000.23		359.256	5385.39		359.256	9287.93		359.256	7475.85		359.256	9742.12		359.256	7311.04		359.256	15182.3		359.256	10911.6		359.256	4898.33		359.256	12822.9		359.256	11390		359.256	7452.7		359.256	9158.88		359.256	4414.51		359.256	10259.3		359.256
361.17	10013.1	0.542865		361.17	9019.37		361.17	5421.52		361.17	9290.17		361.17	7428.35		361.17	9783.78		361.17	7317.99		361.17	15216.3		361.17	10857.7		361.17	4918.21		361.17	12809.3		361.17	11403.4		361.17	7484.23		361.17	9152.06		361.17	4427.52		361.17	10322		361.17
363.086	10065.8	0.545719		363.086	9057.52		363.086	5411.35		363.086	9324.22		363.086	7492.73		363.086	9833.9		363.086	7333.32		363.086	15224.3		363.086	10908.7		363.086	4928.4		363.086	12828.7		363.086	11391.5		363.086	7482.45		363.086	9216.94		363.086	4437.27		363.086	10335.8		363.086
365	10063	0.545569		365	9049.04		365	5410.85		365	9332.89		365	7508.98		365	9861.33		365	7367.75		365	15265.4		365	10920.1		365	4934.04		365	12866.4		365	11467.7		365	7518.07		365	9156.01		365	4447.48		365	10341.4		365
366.913	10069.3	0.545908		366.913	9045.88		366.913	5451.23		366.913	9336.74		366.913	7516.35		366.913	9793.55		366.913	7347.9		366.913	15242.9		366.913	10927.4		366.913	4927.69		366.913	12863.5		366.913	11460.6		366.913	7507.8		366.913	9216.96		366.913	4463.34		366.913	10371.4		366.913
368.826	10071.7	0.546038		368.826	9031.66		368.826	5427.89		368.826	9332.26		368.826	7521.23		368.826	9847.98		368.826	7359.5		368.826	15260.9		368.826	10937.9		368.826	4931.23		368.826	12865.9		368.826	11458.9		368.826	7492.56		368.826	9216.25		368.826	4473.64		368.826	10339.5		368.826
370.738	10097.9	0.547463		370.738	8988.66		370.738	5430.34		370.738	9364.04		370.738	7523.85		370.738	9892.48		370.738	7358.14		370.738	15297.1		370.738	10965.3		370.738	4940.29		370.738	12887.7		370.738	11512.7		370.738	7507.15		370.738	9214.05		370.738	4456.33		370.738	10399.7		370.738
372.652	10093.2	0.547205		372.652	9066.14		372.652	5439.02		372.652	9304.48		372.652	7520.23		372.652	9854.26		372.652	7353.76		372.652	15204.3		372.652	10961.9		372.652	4930.75		372.652	12855.2		372.652	11478.1		372.652	7470.69		372.652	9200.3		372.652	4444.01		372.652	10364.8		372.652
374.564	10110.9	0.548168		374.564	9068.04		374.564	5465.5		374.564	9383.31		374.564	7544.23		374.564	9909.91		374.564	7361.04		374.564	15297		374.564	10965.9		374.564	4952.23		374.564	12945.5		374.564	11517.4		374.564	7506.39		374.564	9224.75		374.564	4482.44		374.564	10419.2		374.564
376.475	10080.6	0.546525		376.475	9075.52		376.475	5433.2		376.475	9369.85		376.475	7533.35		376.475	9948.12		376.475	7368.1		376.475	15277.2		376.475	10959.4		376.475	4938.19		376.475	12942.8		376.475	11518.5		376.475	7498.45		376.475	9237.54		376.475	4479.13		376.475	10416.5		376.475
378.386	10084.4	0.546728		378.386	9067.66		378.386	5445.16		378.386	9389.97		378.386	7544.1		378.386	9951.11		378.386	7369.87		378.386	15286.4		378.386	10944.9		378.386	4955.43		378.386	12946.3		378.386	11544.1		378.386	7496		378.386	9226		378.386	4457.8		378.386	10409.6		378.386
380.296	10129	0.549149		380.296	9105.37		380.296	5466.59		380.296	9357.29		380.296	7550.35		380.296	9939.42		380.296	7385.81		380.296	15273.9		380.296	10947.9		380.296	4931.99		380.296	12942.3		380.296	11494.3		380.296	7476.84		380.296	9260.1		380.296	4473.27		380.296	10398		380.296
382.209	10104.8	0.547834		382.209	9138.8		382.209	5461.38		382.209	9366.35		382.209	7550.65		382.209	10040.6		382.209	7405.18		382.209	15333.7		382.209	11011.6		382.209	4954.97		382.209	12987.3		382.209	11565.7		382.209	7546.51		382.209	9258.67		382.209	4496.98		382.209	10446.6		382.209
384.118	10097.9	0.54746		384.118	9090.66		384.118	5431.34		384.118	9395.3		384.118	7547.1		384.118	10021.3		384.118	7389.72		384.118	15327.3		384.118	10989.7		384.118	4956.66		384.118	12931.3		384.118	11549.5		384.118	7520.92		384.118	9277.73		384.118	4476.74		384.118	10433.7		384.118
386.028	10129.4	0.549171		386.028	9118.66		386.028	5465.02		386.028	9384.48		386.028	7545.6		386.028	10015.1		386.028	7370.79		386.028	15286		386.028	10948.3		386.028	5003		386.028	12980.4		386.028	11576.5		386.028	7533.89		386.028	9274.94		386.028	4494.13		386.028	10428.4		386.028
387.937	10180.6	0.551943		387.937	9120.8		387.937	5454.33		387.937	9420.9		387.937	7528.85		387.937	10045.3		387.937	7362.68		387.937	15341.8		387.937	11030.9		387.937	4946.99		387.937	12976.1		387.937	11552.7		387.937	7509.27		387.937	9251.51		387.937	4516.22		387.937	10423.4		387.937
389.845	10151.4	0.55036		389.845	9073.23		389.845	5455.75		389.845	9379.04		389.845	7548.85		389.845	10066.5		389.845	7381.5		389.845	15310.4		389.845	10970.7		389.845	4972.34		389.845	13016.6		389.845	11584.5		389.845	7493.11		389.845	9247.69		389.845	4499.56		389.845	10414.1		389.845
391.753	10149.8	0.550275		391.753	9129.9		391.753	5475.17		391.753	9399.4		391.753	7524.85		391.753	10128.5		391.753	7407		391.753	15309.6		391.753	11006.3		391.753	4982.9		391.753	12980.9		391.753	11594.7		391.753	7521		391.753	9277.94		391.753	4493.23		391.753	10437		391.753
393.663	10125.4	0.548954		393.663	9136.37		393.663	5470.76		393.663	9422.54		393.663	7593.23		393.663	10107.5		393.663	7418.69		393.663	15344.9		393.663	10969.6		393.663	4970.84		393.663	12968.7		393.663	11560.4		393.663	7518.59		393.663	9298.69		393.663	4518.26		393.663	10446.8		393.663
395.571	10183	0.552075		395.571	9127.94		395.571	5464.24		395.571	9412.52		395.571	7550.35		395.571	10115.3		395.571	7392.33		395.571	15352.1		395.571	10971.4		395.571	4975.63		395.571	13061.3		395.571	11581.6		395.571	7512.49		395.571	9282.01		395.571	4476.81		395.571	10439.6		395.571
397.478	10130.8	0.549243		397.478	9101.23		397.478	5475.73		397.478	9451.04		397.478	7565.48		397.478	10121.5		397.478	7370.97		397.478	15344.5		397.478	10997.3		397.478	4978.84		397.478	13006.6		397.478	11581.3		397.478	7528.05		397.478	9271.88		397.478	4504.05		397.478	10476.3		397.478
399.384	10189.5	0.552427		399.384	9156.09		399.384	5471.19		399.384	9435.41		399.384	7639.35		399.384	10076		399.384	7400.06		399.384	15393.7		399.384	11081.7		399.384	4985.09		399.384	13033.7		399.384	11601.9		399.384	7552.07		399.384	9311.42		399.384	4506.69		399.384	10478.4		399.384
401.291	10198.5	0.552913		401.291	9194.8		401.291	5463.24		401.291	9447.01		401.291	7579.98		401.291	10084.7		401.291	7434.42		401.291	15385.1		401.291	11032.2		401.291	5007.62		401.291	13069.6		401.291	11675.1		401.291	7565.34		401.291	9327.5		401.291	4529.19		401.291	10494.4		401.291
403.197	10183.1	0.552082		403.197	9177.52		403.197	5481.56		403.197	9452.49		403.197	7624.98		403.197	10047		403.197	7433.61		403.197	15409.3		403.197	11068.5		403.197	5002.83		403.197	13060		403.197	11677		403.197	7550.34		403.197	9322.38		403.197	4526.09		403.197	10493.1		403.197
405.102	10206	0.553322		405.102	9209.09		405.102	5501.65		405.102	9451.83		405.102	7551.73		405.102	10031.1		405.102	7428.59		405.102	15438.3		405.102	11066.8		405.102	5016.41		405.102	13044.3		405.102	11612.8		405.102	7563.36		405.102	9306.47		405.102	4530.68		405.102	10504.8		405.102
407.007	10167.1	0.551213		407.007	9178.66		407.007	5504.6		407.007	9487.91		407.007	7629.48		407.007	10056.3		407.007	7414.29		407.007	15425.8		407.007	11058.9		407.007	5015.28		407.007	13098.1		407.007	11701.1		407.007	7578.74		407.007	9316.3		407.007	4584.75		407.007	10551.2		407.007
408.914	10277.8	0.557212		408.914	9198.09		408.914	5507.04		408.914	9495.31		408.914	7615.35		408.914	10044		408.914	7461.89		408.914	15472.9		408.914	11078.7		408.914	4991.39		408.914	13106.4		408.914	11675.8		408.914	7553.47		408.914	9335.6		408.914	4582.83		408.914	10538.8		408.914
410.819	10227.7	0.554497		410.819	9202.09		410.819	5494.49		410.819	9478.2		410.819	7625.65		410.819	10026.9		410.819	7454.54		410.819	15475.4		410.819	11088.6		410.819	5028.19		410.819	13092.5		410.819	11732.5		410.819	7549.42		410.819	9334.35		410.819	4647.39		410.819	10507.8		410.819
412.723	10275.3	0.557079		412.723	9260.09		412.723	5515.65		412.723	9494.39		412.723	7644.48		412.723	10030.2		412.723	7447.29		412.723	15463.1		412.723	11132.9		412.723	5051.15		412.723	13180.7		412.723	11719.4		412.723	7614.9		412.723	9396.07		412.723	4658.97		412.723	10522		412.723
414.626	10295.5	0.558174		414.626	9235.52		414.626	5548.7		414.626	9524.09		414.626	7655.85		414.626	10031.3		414.626	7462.96		414.626	15491.2		414.626	11127.7		414.626	5061.41		414.626	13191		414.626	11798.5		414.626	7653.71		414.626	9372.67		414.626	4704.46		414.626	10576.5		414.626
416.529	10244.6	0.555416		416.529	9240.09		416.529	5549.23		416.529	9550.81		416.529	7673.35		416.529	10098.1		416.529	7512.72		416.529	15543		416.529	11167		416.529	5029.79		416.529	13254.7		416.529	11730.3		416.529	7626.13		416.529	9367.13		416.529	4682.22		416.529	10584.2		416.529
418.432	10276.6	0.557151		418.432	9251.52		418.432	5528.03		418.432	9535.33		418.432	7651.35		418.432	10046.6		418.432	7504.5		418.432	15523.4		418.432	11152.7		418.432	5044.37		418.432	13264.1		418.432	11815.3		418.432	7637.42		418.432	9403.63		418.432	4668.51		418.432	10594		418.432
420.335	10316.3	0.559302		420.335	9229.83		420.335	5534.9		420.335	9567.37		420.335	7624.82		420.335	10029.1		420.335	7472.39		420.335	15554.5		420.335	11181.2		420.335	5066.16		420.335	13293.1		420.335	11810.1		420.335	7655.37		420.335	9410.88		420.335	4590.23		420.335	10589.1		420.335
422.237	10332.3	0.560167		422.237	9288.8		422.237	5532.17		422.237	9541.82		422.237	7706.1		422.237	10027		422.237	7531.64		422.237	15577.6		422.237	11183.1		422.237	5051.51		422.237	13243.5		422.237	11853.5		422.237	7609.97		422.237	9425.23		422.237	4602.26		422.237	10645.5		422.237
424.138	10357.4	0.561532		424.138	9376.95		424.138	5535.87		424.138	9590.47		424.138	7712.73		424.138	10083.5		424.138	7521.97		424.138	15631.1		424.138	11246.5		424.138	5085.2		424.138	13301.2		424.138	11871.2		424.138	7681.64		424.138	9505.48		424.138	4608.31		424.138	10667		424.138
426.04	10400.8	0.56388		426.04	9344.37		426.04	5586.31		426.04	9638.72		426.04	7718.65		426.04	10078.7		426.04	7524.87		426.04	15671.4		426.04	11272.1		426.04	5087.76		426.04	13338.7		426.04	11859.9		426.04	7687.77		426.04	9481.13		426.04	4591.38		426.04	10688.2		426.04
427.941	10373.5	0.562401		427.941	9381.66		427.941	5584.77		427.941	9634.91		427.941	7725.73		427.941	10074.9		427.941	7570.93		427.941	15679.6		427.941	11275.4		427.941	5110.5		427.941	13375.3		427.941	11956.8		427.941	7719.02		427.941	9510.63		427.941	4607.05		427.941	10715.9		427.941
429.841	10423.3	0.565103		429.841	9410.66		429.841	5589.25		429.841	9645.68		429.841	7766.23		429.841	10094.3		429.841	7600.58		429.841	15683.3		429.841	11281.6		429.841	5133.79		429.841	13382.8		429.841	11929.5		429.841	7686.13		429.841	9538.28		429.841	4588.25		429.841	10723.9		429.841
431.741	10412	0.564489		431.741	9384.52		431.741	5632.9		431.741	9661.14		431.741	7750.74		431.741	10114.8		431.741	7586.68		431.741	15737.5		431.741	11329.6		431.741	5104.09		431.741	13401		431.741	11920.9		431.741	7699.16		431.741	9557.56		431.741	4614.27		431.741	10725.5		431.741
433.641	10444.1	0.566232		433.641	9419.23		433.641	5599.76		433.641	9696.54		433.641	7778.73		433.641	10146.4		433.641	7635.77		433.641	15800.9		433.641	11334.1		433.641	5126.75		433.641	13446.5		433.641	12030.5		433.641	7736.78		433.641	9567.84		433.641	4634.74		433.641	10751.6		433.641
435.541	10471	0.567687		435.541	9428.02		435.541	5621.15		435.541	9745.67		435.541	7839.6		435.541	10169.7		435.541	7638.29		435.541	15873.8		435.541	11345.2		435.541	5169.6		435.541	13539.8		435.541	12018.2		435.541	7763.73		435.541	9608.94		435.541	4640.09		435.541	10820.8		435.541
437.44	10482.1	0.568288		437.44	9460.66		437.44	5630.76		437.44	9730.47		437.44	7814.03		437.44	10182.8		437.44	7633.39		437.44	15832.6		437.44	11362.6		437.44	5175.64		437.44	13508.5		437.44	12048.5		437.44	7798.77		437.44	9616.75		437.44	4640.02		437.44	10792.7		437.44
439.338	10505.8	0.569576		439.338	9491.95		439.338	5640.52		439.338	9773.12		439.338	7834.73		439.338	10216.7		439.338	7642.29		439.338	15870.7		439.338	11403.9		439.338	5173.98		439.338	13556		439.338	12123.3		439.338	7792.41		439.338	9641.07		439.338	4656.59		439.338	10801.6		439.338
441.237	10521.5	0.570425		441.237	9503.37		441.237	5644.23		441.237	9786.14		441.237	7839.1		441.237	10220.2		441.237	7680.51		441.237	15864.8		441.237	11440.9		441.237	5180.62		441.237	13587.1		441.237	12060.8		441.237	7772.83		441.237	9646.23		441.237	4654.32		441.237	10832.1		441.237
443.134	10571.6	0.573144		443.134	9566.37		443.134	5646.33		443.134	9812.26		443.134	7853.85		443.134	10251.4		443.134	7699.15		443.134	15918.1		443.134	11453		443.134	5227.65		443.134	13634		443.134	12110.2		443.134	7828.62		443.134	9725.8		443.134	4679.92		443.134	10879		443.134
445.032	10585.4	0.573891		445.032	9500.31		445.032	5688.57		445.032	9808.17		445.032	7884.23		445.032	10249.8		445.032	7663.86		445.032	15909		445.032	11497.8		445.032	5198.28		445.032	13613		445.032	12150.4		445.032	7813.56		445.032	9662.79		445.032	4670.51		445.032	10874.2		445.032
446.929	10592.2	0.574261		446.929	9510.37		446.929	5688.17		446.929	9864.46		446.929	7883.69		446.929	10248.6		446.929	7726.36		446.929	16005.4		446.929	11429.4		446.929	5202.86		446.929	13650.7		446.929	12173.5		446.929	7829.96		446.929	9670.38		446.929	4688.04		446.929	10891.6		446.929
448.826	10627.1	0.576152		448.826	9575.33		448.826	5663.71		448.826	9856.26		448.826	7906.6		448.826	10311.5		448.826	7722.86		448.826	15948.6		448.826	11519.6		448.826	5239.39		448.826	13744.9		448.826	12202.1		448.826	7814.58		448.826	9757.19		448.826	4687.85		448.826	10959.7		448.826
450.722	10622.4	0.575896		450.722	9629.52		450.722	5701.55		450.722	9872.34		450.722	7919.6		450.722	10300		450.722	7712.57		450.722	16013.7		450.722	11522		450.722	5229.68		450.722	13766.7		450.722	12208.2		450.722	7848.55		450.722	9757.47		450.722	4700.05		450.722	10947		450.722
452.618	10631.3	0.576377		452.618	9638.23		452.618	5706.18		452.618	9915.77		452.618	7935.1		452.618	10328.5		452.618	7754.33		452.618	16053.5		452.618	11601.1		452.618	5256.61		452.618	13748.8		452.618	12213.6		452.618	7894.23		452.618	9779.38		452.618	4727.09		452.618	10972.8		452.618
454.514	10720.8	0.581234		454.514	9643.52		454.514	5717.13		454.514	9939.36		454.514	7966.48		454.514	10294.4		454.514	7759.11		454.514	16076.5		454.514	11535.3		454.514	5242.73		454.514	13757.1		454.514	12298.7		454.514	7891.28		454.514	9742.38		454.514	4690.04		454.514	10987		454.514
456.409	10718.9	0.58113		456.409	9630.23		456.409	5725.06		456.409	9937.99		456.409	8001.65		456.409	10345.8		456.409	7810.5		456.409	16100		456.409	11592.2		456.409	5258.85		456.409	13785.5		456.409	12340.4		456.409	7934.24		456.409	9808.38		456.409	4741.07		456.409	11037.7		456.409
458.304	10742.9	0.58243		458.304	9676.37		458.304	5733.7		458.304	9957.6		458.304	7987.6		458.304	10390		458.304	7803.62		458.304	16152.2		458.304	11638.6		458.304	5268.08		458.304	13815.5		458.304	12297.6		458.304	7935.89		458.304	9830.13		458.304	4706.72		458.304	11032.1		458.304
460.198	10750.3	0.582829		460.198	9689.09		460.198	5749.25		460.198	9973.82		460.198	7987.6		460.198	10385.5		460.198	7797.5		460.198	16140.3		460.198	11682.4		460.198	5292.94		460.198	13842.4		460.198	12305.3		460.198	7935.28		460.198	9847.94		460.198	4759.56		460.198	11048.3		460.198
462.09	10802.3	0.585651		462.09	9742.57		462.09	5734.31		462.09	10011.5		462.09	8005.07		462.09	10401.5		462.09	7809.25		462.09	16137		462.09	11640.7		462.09	5259.96		462.09	13827.4		462.09	12366.7		462.09	7947.35		462.09	9863.88		462.09	4766.33		462.09	11079.9		462.09
463.984	10868.2	0.589222		463.984	9763.8		463.984	5784.71		463.984	10041.6		463.984	8064.32		463.984	10415.3		463.984	7854.05		463.984	16205.5		463.984	11699.7		463.984	5304.43		463.984	13941.8		463.984	12401.1		463.984	7974.82		463.984	9883.31		463.984	4771.35		463.984	11108.4		463.984
465.877	10825.5	0.586908		465.877	9750.23		465.877	5744.34		465.877	10046.6		465.877	8059.73		465.877	10389.1		465.877	7859.29		465.877	16213.5		465.877	11695.4		465.877	5310.27		465.877	13915.6		465.877	12393.1		465.877	7992.78		465.877	9889.47		465.877	4795.35		465.877	11128		465.877
467.77	10864.1	0.589002		467.77	9761.09		467.77	5793.27		467.77	10046.7		467.77	8053.32		467.77	10455		467.77	7890.1		467.77	16269.5		467.77	11698.4		467.77	5314.44		467.77	13940.4		467.77	12439.2		467.77	7981		467.77	9925.06		467.77	4771.55		467.77	11133.1		467.77
469.663	10819.6	0.58659		469.663	9760.09		469.663	5790.23		469.663	10044.9		469.663	8026.1		469.663	10439		469.663	7863.5		469.663	16213.1		469.663	11735		469.663	5352.47		469.663	13987.2		469.663	12434.4		469.663	8012.78		469.663	9915.88		469.663	4781.98		469.663	11140.5		469.663
471.555	10860.4	0.588799		471.555	9722.66		471.555	5779.53		471.555	10105.9		471.555	8064.07		471.555	10487.6		471.555	7839.4		471.555	16244.5		471.555	11739		471.555	5332.42		471.555	13943.2		471.555	12465.7		471.555	7978.84		471.555	9963.05		471.555	4807.98		471.555	11138.6		471.555
473.447	10822.2	0.586727		473.447	9812.09		473.447	5752.29		473.447	10096.5		473.447	8079.9		473.447	10441.9		473.447	7909.9		473.447	16296.7		473.447	11760.7		473.447	5304.28		473.447	13990.5		473.447	12457.8		473.447	8001.88		473.447	9907.75		473.447	4782.78		473.447	11156		473.447
475.339	10867.7	0.589198		475.339	9809.66		475.339	5797.3		475.339	10121.2		475.339	8056.6		475.339	10483		475.339	7908.97		475.339	16318.9		475.339	11759.4		475.339	5352.21		475.339	13996.8		475.339	12513.6		475.339	8026.63		475.339	10001.6		475.339	4844.29		475.339	11209.4		475.339
477.23	10897.8	0.590825		477.23	9810.04		477.23	5782.01		477.23	10126.8		477.23	8105.49		477.23	10502		477.23	7892.51		477.23	16332.9		477.23	11796.5		477.23	5332.34		477.23	14019.2		477.23	12533.2		477.23	8033.1		477.23	9994.19		477.23	4814.67		477.23	11219.7		477.23
479.118	10906.6	0.591303		479.118	9798.33		479.118	5801.74		479.118	10109.3		479.118	8120.48		479.118	10529.2		479.118	7912.75		479.118	16340.7		479.118	11794.9		479.118	5359.31		479.118	14041.8		479.118	12512.8		479.118	8035.11		479.118	9941.75		479.118	4821.13		479.118	11198.4		479.118
481.009	10895	0.590675		481.009	9817.74		481.009	5829.47		481.009	10121		481.009	8107.9		481.009	10520.8		481.009	7940.64		481.009	16353.4		481.009	11780.3		481.009	5360.48		481.009	14075.6		481.009	12568.8		481.009	8032.09		481.009	9959.17		481.009	4856.93		481.009	11217.6		481.009
482.898	10926	0.592357		482.898	9879.14		482.898	5818.7		482.898	10138.2		482.898	8117.55		482.898	10559.3		482.898	7926.44		482.898	16380.7		482.898	11788.3		482.898	5354.04		482.898	14107.9		482.898	12507.6		482.898	8053.61		482.898	9997.47		482.898	4839.67		482.898	11267.2		482.898
484.788	10892.9	0.590564		484.788	9842.09		484.788	5811.29		484.788	10112.1		484.788	8134.32		484.788	10574.6		484.788	7925.94		484.788	16385.1		484.788	11848.9		484.788	5385.58		484.788	14069		484.788	12576		484.788	8032.06		484.788	9998.56		484.788	4850.43		484.788	11214.8		484.788
486.677	10892.9	0.590564		486.677	9872.66		486.677	5825.75		486.677	10169.8		486.677	8142.44		486.677	10578.3		486.677	7918.73		486.677	16373.3		486.677	11848.6		486.677	5375.11		486.677	14101.6		486.677	12572.2		486.677	8035.38		486.677	9971		486.677	4877.76		486.677	11240.9		486.677
488.566	10906.5	0.5913		488.566	9916.61		488.566	5841.03		488.566	10163.8		488.566	8134.69		488.566	10599.6		488.566	7929.87		488.566	16377.2		488.566	11834.3		488.566	5376.24		488.566	14109.1		488.566	12627.7		488.566	8099.18		488.566	10061.3		488.566	4900.42		488.566	11276.8		488.566
490.452	10944.2	0.593344		490.452	9907.95		490.452	5840.81		490.452	10190.8		490.452	8153.98		490.452	10609.4		490.452	7942.38		490.452	16461.4		490.452	11900.6		490.452	5408.94		490.452	14149.9		490.452	12603.9		490.452	8065.75		490.452	10066.2		490.452	4931.69		490.452	11254.6		490.452
492.34	11013.1	0.597077		492.34	9920.37		492.34	5857.72		492.34	10192.4		492.34	8170.6		492.34	10646.1		492.34	7983.85		492.34	16433.6		492.34	11862.7		492.34	5429.62		492.34	14193.2		492.34	12665.4		492.34	8093.39		492.34	10092.3		492.34	4980.7		492.34	11306.9		492.34
494.228	10914.7	0.591743		494.228	9915.95		494.228	5837.17		494.228	10213.5		494.228	8102.77		494.228	10672.5		494.228	7966.33		494.228	16458.9		494.228	11892.4		494.228	5424.59		494.228	14182.9		494.228	12654.9		494.228	8096.39		494.228	10072.8		494.228	4982.96		494.228	11283.1		494.228
496.115	10973.7	0.594944		496.115	9912.29		496.115	5870.07		496.115	10177.7		496.115	8181.85		496.115	10666.6		496.115	7972.11		496.115	16502		496.115	11923		496.115	5410.12		496.115	14260.4		496.115	12684.1		496.115	8111.29		496.115	10096.6		496.115	4980.94		496.115	11301.7		496.115
498.002	10972.1	0.594854		498.002	9916.37		498.002	5853.59		498.002	10241.2		498.002	8138.42		498.002	10699.2		498.002	8012.32		498.002	16438		498.002	11913.5		498.002	5409.65		498.002	14198.9		498.002	12675.6		498.002	8121.52		498.002	10125		498.002	4956.67		498.002	11366.6		498.002
499.887	10986.2	0.59562		499.887	9917.46		499.887	5869.63		499.887	10219.4		499.887	8206.62		499.887	10739.2		499.887	7992.43		499.887	16447		499.887	11861.7		499.887	5428.29		499.887	14211.8		499.887	12689.5		499.887	8123.13		499.887	10116.5		499.887	4930.65		499.887	11294.4		499.887
501.773	10992.2	0.595947		501.773	9887.23		501.773	5836.31		501.773	10208.8		501.773	8179.73		501.773	10744		501.773	7971.33		501.773	16430		501.773	11891.4		501.773	5394.2		501.773	14200.3		501.773	12665.4		501.773	8106.08		501.773	10100.1		501.773	4899.1		501.773	11273.3		501.773
503.659	10996.3	0.596166		503.659	9933.8		503.659	5877.69		503.659	10231.7		503.659	8177.23		503.659	10756.5		503.659	8018.15		503.659	16504.6		503.659	11954.2		503.659	5381.97		503.659	14226.4		503.659	12732.7		503.659	8131.63		503.659	10157.9		503.659	4895.99		503.659	11313.3		503.659
505.544	11020.1	0.59746		505.544	9968.37		505.544	5864.42		505.544	10282.1		505.544	8207.1		505.544	10833.5		505.544	8026.24		505.544	16531.9		505.544	11969.4		505.544	5423.66		505.544	14242.2		505.544	12735.5		505.544	8142.93		505.544	10101.9		505.544	4901.97		505.544	11332		505.544
507.427	11020.9	0.597501		507.427	9934.2		507.427	5872.99		507.427	10251.2		507.427	8235.1		507.427	10877.7		507.427	7985.26		507.427	16510.2		507.427	11922.4		507.427	5439.99		507.427	14274.7		507.427	12719		507.427	8124.72		507.427	10141.9		507.427	4891.03		507.427	11365.4		507.427
509.312	11032.8	0.598144		509.312	9941.95		509.312	5872.74		509.312	10306.6		509.312	8288.35		509.312	10915.1		509.312	8004.72		509.312	16467.8		509.312	11964.4		509.312	5424.29		509.312	14291.3		509.312	12742.4		509.312	8122.49		509.312	10079.1		509.312	4878.78		509.312	11375		509.312
511.196	11037.7	0.598414		511.196	10010.1		511.196	5872.24		511.196	10299.7		511.196	8208.85		511.196	10957		511.196	8030.63		511.196	16560.4		511.196	11952.4		511.196	5448.71		511.196	14298.3		511.196	12781.3		511.196	8149.54		511.196	10198.2		511.196	4875.98		511.196	11383.8		511.196
513.08	11100.4	0.601813		513.08	10008.7		513.08	5903.01		513.08	10335.1		513.08	8233.23		513.08	10905.2		513.08	8039.5		513.08	16553.3		513.08	12036.6		513.08	5467.12		513.08	14332.9		513.08	12807.8		513.08	8190.66		513.08	10178.4		513.08	4903.35		513.08	11386.8		513.08
514.961	11086.1	0.601038		514.961	10016.5		514.961	5902.84		514.961	10331.4		514.961	8265.65		514.961	10922.3		514.961	8044.64		514.961	16590.7		514.961	12075.5		514.961	5457.65		514.961	14386.3		514.961	12810.2		514.961	8198.12		514.961	10181.1		514.961	4911.11		514.961	11410.1		514.961
516.845	11114.5	0.602577		516.845	10007.1		516.845	5910.63		516.845	10342.7		516.845	8289.24		516.845	10915.7		516.845	8059.02		516.845	16544.1		516.845	12035.7		516.845	5478.7		516.845	14349.4		516.845	12847.8		516.845	8178.19		516.845	10232.3		516.845	4913.29		516.845	11450.8		516.845
518.727	11152.9	0.604657		518.727	10043.5		518.727	5918.1		518.727	10365.1		518.727	8279.6		518.727	10966.3		518.727	8064.04		518.727	16625		518.727	12079		518.727	5470.54		518.727	14419.9		518.727	12865.9		518.727	8189.36		518.727	10195.4		518.727	4904.16		518.727	11425.5		518.727
520.608	11123.4	0.603058		520.608	10061.9		520.608	5936.61		520.608	10358		520.608	8279.73		520.608	10921.8		520.608	8072.61		520.608	16637.9		520.608	12067.4		520.608	5465.62		520.608	14421.3		520.608	12883.2		520.608	8229.07		520.608	10213.9		520.608	4929.3		520.608	11428.2		520.608
522.49	11161.8	0.605141		522.49	10057.1		522.49	5928.26		522.49	10402.5		522.49	8302.99		522.49	10895		522.49	8078.58		522.49	16632.4		522.49	12117.2		522.49	5520.11		522.49	14438		522.49	12884.5		522.49	8197.81		522.49	10234.6		522.49	4925.81		522.49	11497		522.49
524.371	11076.7	0.600528		524.371	10067.9		524.371	5902.98		524.371	10339.9		524.371	8290.85		524.371	10918		524.371	8051.39		524.371	16661.6		524.371	12099		524.371	5498.68		524.371	14441.6		524.371	12852.4		524.371	8199.55		524.371	10220.3		524.371	4932.78		524.371	11498.4		524.371
526.253	11158.5	0.60496		526.253	10093.8		526.253	5952.12		526.253	10405.1		526.253	8352.85		526.253	10922.7		526.253	8124.53		526.253	16674.3		526.253	12104.5		526.253	5516.71		526.253	14478.1		526.253	12932.5		526.253	8232		526.253	10297.7		526.253	4942.4		526.253	11532.9		526.253
528.132	11171.7	0.605675		528.132	10131.8		528.132	5963.02		528.132	10418		528.132	8329.23		528.132	10912.7		528.132	8146.54		528.132	16721.5		528.132	12197.1		528.132	5516.83		528.132	14533.2		528.132	12969.8		528.132	8260		528.132	10269.9		528.132	4942.07		528.132	11537.5		528.132
530.012	11176.3	0.605927		530.012	10100.4		530.012	5952.64		530.012	10431.1		530.012	8306.23		530.012	10883.4		530.012	8126.37		530.012	16691.8		530.012	12147.2		530.012	5530.52		530.012	14494.3		530.012	12948.3		530.012	8263.44		530.012	10272.5		530.012	4918.3		530.012	11526.7		530.012
531.892	11241.4	0.609458		531.892	10174.4		531.892	5953.97		531.892	10448.3		531.892	8377.43		531.892	10935.4		531.892	8143.59		531.892	16737.9		531.892	12190.2		531.892	5564.44		531.892	14550.3		531.892	12984.2		531.892	8258.2		531.892	10337.8		531.892	4952.72		531.892	11578.3		531.892
533.77	11253.2	0.610097		533.77	10166.9		533.77	5951.98		533.77	10462.9		533.77	8347.98		533.77	10911.3		533.77	8111.24		533.77	16776.5		533.77	12196.4		533.77	5545.92		533.77	14601.9		533.77	12981.2		533.77	8270.49		533.77	10326.2		533.77	4936.98		533.77	11555.7		533.77
535.649	11242.6	0.609523		535.649	10119.8		535.649	5966.61		535.649	10462.8		535.649	8358.1		535.649	10855.2		535.649	8148.36		535.649	16779.1		535.649	12165.5		535.649	5541.41		535.649	14529.2		535.649	12973.7		535.649	8275.04		535.649	10307.4		535.649	4995.86		535.649	11573.2		535.649
537.526	11275.9	0.611326		537.526	10209.9		537.526	5990.77		537.526	10503.6		537.526	8396.1		537.526	10915.5		537.526	8177.4		537.526	16799.1		537.526	12179.1		537.526	5562.28		537.526	14591		537.526	13045.2		537.526	8279.3		537.526	10353.9		537.526	4965.71		537.526	11589.4		537.526
539.405	11274.1	0.611229		539.405	10203.3		539.405	5990.5		539.405	10542.6		539.405	8411.24		539.405	10890.5		539.405	8178.33		539.405	16883.3		539.405	12228.9		539.405	5555.55		539.405	14638.7		539.405	13137.4		539.405	8312.38		539.405	10380		539.405	4991.08		539.405	11626.2		539.405
541.283	11293.8	0.612297		541.283	10227.3		541.283	6018.01		541.283	10535.9		541.283	8386.12		541.283	10901.9		541.283	8181.22		541.283	16855.1		541.283	12254.9		541.283	5568.43		541.283	14673.9		541.283	13071.9		541.283	8308.1		541.283	10375.6		541.283	5001.23		541.283	11684.2		541.283
543.159	11335.6	0.614561		543.159	10287.4		543.159	6012.47		543.159	10541		543.159	8452.98		543.159	10934.4		543.159	8210.82		543.159	16915.1		543.159	12292.8		543.159	5567.86		543.159	14710.3		543.159	13118.8		543.159	8303.44		543.159	10424.2		543.159	4987.09		543.159	11676.2		543.159
545.037	11354.3	0.615578		545.037	10265.1		545.037	5982.09		545.037	10591.3		545.037	8418.07		545.037	10947.6		545.037	8215.68		545.037	16935.8		545.037	12347.4		545.037	5604.41		545.037	14670.2		545.037	13101.5		545.037	8350.35		545.037	10463.8		545.037	5011.67		545.037	11657.2		545.037
546.914	11385.9	0.617287		546.914	10284.6		546.914	6032.06		546.914	10566.5		546.914	8467.94		546.914	10980		546.914	8253.91		546.914	16946.2		546.914	12306.6		546.914	5626.61		546.914	14746		546.914	13178.1		546.914	8391.75		546.914	10443.3		546.914	5026.24		546.914	11751.8		546.914
548.789	11402.1	0.618166		548.789	10282.1		548.789	6024.8		548.789	10608.9		548.789	8463.9		548.789	10999.4		548.789	8247.21		548.789	16952		548.789	12261		548.789	5628.16		548.789	14742.1		548.789	13143.7		548.789	8365.24		548.789	10539.6		548.789	5037.77		548.789	11719.5		548.789
550.665	11401	0.618109		550.665	10278.8		550.665	6062.91		550.665	10605.5		550.665	8443.48		550.665	11006		550.665	8274.55		550.665	16984.4		550.665	12319.4		550.665	5642.19		550.665	14798		550.665	13169.9		550.665	8399.02		550.665	10487.4		550.665	5018.31		550.665	11744.7		550.665
552.539	11420.6	0.619169		552.539	10300.1		552.539	6069.42		552.539	10621.5		552.539	8503.23		552.539	11033.5		552.539	8278.89		552.539	17021.5		552.539	12403.5		552.539	5677.97		552.539	14825.1		552.539	13193.5		552.539	8395.45		552.539	10495.9		552.539	5049.21		552.539	11780.8		552.539
554.415	11442	0.620329		554.415	10341.4		554.415	6061.2		554.415	10638.7		554.415	8502.85		554.415	11028.1		554.415	8283.39		554.415	17059.1		554.415	12409.9		554.415	5662.81		554.415	14881.5		554.415	13276.9		554.415	8384.12		554.415	10524.4		554.415	5051.67		554.415	11791.1		554.415
556.29	11462.4	0.621437		556.29	10355.1		556.29	6069.17		556.29	10660		556.29	8471.37		556.29	10984.8		556.29	8315.08		556.29	17076.5		556.29	12444.4		556.29	5657.34		556.29	14881.3		556.29	13267		556.29	8409.33		556.29	10549		556.29	5066.3		556.29	11789.4		556.29
558.163	11486.9	0.622768		558.163	10347.9		558.163	6113.55		558.163	10702.2		558.163	8539.22		558.163	11103.4		558.163	8304.48		558.163	17067.5		558.163	12451.9		558.163	5672.9		558.163	14970		558.163	13301.9		558.163	8449.42		558.163	10574		558.163	5076.99		558.163	11818.4		558.163
560.037	11501.9	0.623578		560.037	10356.9		560.037	6071.87		560.037	10697.7		560.037	8547.57		560.037	11036.5		560.037	8315.76		560.037	17110.2		560.037	12475.3		560.037	5704.69		560.037	14917.5		560.037	13332.6		560.037	8459.46		560.037	10601.6		560.037	5065.71		560.037	11846		560.037
561.909	11533.1	0.625271		561.909	10355.7		561.909	6116.98		561.909	10697.4		561.909	8582.35		561.909	11052		561.909	8381.98		561.909	17150.3		561.909	12525.1		561.909	5700.82		561.909	15021.3		561.909	13408.1		561.909	8483.3		561.909	10579.9		561.909	5078.97		561.909	11877.1		561.909
563.783	11589	0.628301		563.783	10434.9		563.783	6121.34		563.783	10754.9		563.783	8578.03		563.783	11121.7		563.783	8362.08		563.783	17191.1		563.783	12548.2		563.783	5730.56		563.783	15003.4		563.783	13416		563.783	8491.18		563.783	10609.2		563.783	5118.6		563.783	11874.7		563.783
565.655	11558.3	0.626635		565.655	10444.2		565.655	6139.92		565.655	10733.9		565.655	8605.32		565.655	11115.9		565.655	8411.11		565.655	17212.9		565.655	12523.2		565.655	5715.6		565.655	15051.6		565.655	13385.8		565.655	8468.74		565.655	10664.3		565.655	5096.04		565.655	11917.9		565.655
567.528	11604.7	0.629154		567.528	10471.3		567.528	6111.74		567.528	10802.9		567.528	8593.32		567.528	11122.9		567.528	8379.55		567.528	17247		567.528	12543.4		567.528	5750.62		567.528	15066.1		567.528	13433.6		567.528	8521.06		567.528	10645.1		567.528	5140.4		567.528	11931.3		567.528
569.398	11609.2	0.629396		569.398	10468.3		569.398	6155.22		569.398	10821.9		569.398	8658.99		569.398	11180.1		569.398	8389.62		569.398	17255.3		569.398	12545.9		569.398	5741.06		569.398	15023.8		569.398	13502.7		569.398	8516.24		569.398	10719.5		569.398	5147.32		569.398	11979.2		569.398
571.271	11625.8	0.630298		571.271	10538.7		571.271	6158.75		571.271	10824.3		571.271	8716.6		571.271	11252.8		571.271	8443.58		571.271	17342.8		571.271	12632.4		571.271	5769.83		571.271	15153.3		571.271	13536.2		571.271	8581.32		571.271	10770.8		571.271	5156.77		571.271	12017.4		571.271
573.14	11655.7	0.631917		573.14	10502.5		573.14	6183.8		573.14	10828.1		573.14	8655.93		573.14	11235.1		573.14	8419.47		573.14	17288.8		573.14	12653		573.14	5777.26		573.14	15118.6		573.14	13578.7		573.14	8568.28		573.14	10735		573.14	5148.71		573.14	12018.5		573.14
575.012	11681.3	0.633306		575.012	10602.1		575.012	6184.84		575.012	10874		575.012	8700.82		575.012	11242.6		575.012	8446.21		575.012	17373.4		575.012	12682.2		575.012	5741.1		575.012	15209.2		575.012	13540.8		575.012	8586.2		575.012	10756.9		575.012	5155.04		575.012	12033		575.012
576.883	11691.4	0.63385		576.883	10595.1		576.883	6225.4		576.883	10907.8		576.883	8680.78		576.883	11245		576.883	8448.51		576.883	17351.5		576.883	12669.3		576.883	5760.25		576.883	15160.3		576.883	13574.9		576.883	8596.74		576.883	10768.7		576.883	5170.95		576.883	12067.9		576.883
578.752	11704.7	0.634574		578.752	10562.3		578.752	6218.5		578.752	10893.9		578.752	8721.48		578.752	11212.5		578.752	8462.47		578.752	17390.3		578.752	12716		578.752	5746.81		578.752	15160		578.752	13600.5		578.752	8603.22		578.752	10754.8		578.752	5183.03		578.752	12061.2		578.752
580.623	11767.3	0.637966		580.623	10617.9		580.623	6242.38		580.623	10898.6		580.623	8708.6		580.623	11277.9		580.623	8497.86		580.623	17484.6		580.623	12713.8		580.623	5814.84		580.623	15304.6		580.623	13667.6		580.623	8602.63		580.623	10782.6		580.623	5181.13		580.623	12071.1		580.623
582.491	11729.2	0.635902		582.491	10560.7		582.491	6203.41		582.491	10930.6		582.491	8692.98		582.491	11294.3		582.491	8502.19		582.491	17441.9		582.491	12754.7		582.491	5830.9		582.491	15250.9		582.491	13630.3		582.491	8589.85		582.491	10829.6		582.491	5198.59		582.491	12106		582.491
584.358	11779	0.638603		584.358	10642.9		584.358	6230.67		584.358	10956.3		584.358	8777.23		584.358	11326.5		584.358	8524.13		584.358	17482.1		584.358	12828.7		584.358	5831.87		584.358	15255.1		584.358	13655.9		584.358	8656.4		584.358	10844.7		584.358	5208.85		584.358	12125.2		584.358
586.228	11836.1	0.641696		586.228	10654.7		586.228	6241.44		586.228	11010.8		586.228	8830.37		586.228	11386.6		586.228	8579.54		586.228	17564		586.228	12835.9		586.228	5867.65		586.228	15355.5		586.228	13752		586.228	8674.55		586.228	10859.9		586.228	5229.93		586.228	12142.8		586.228
588.094	11799.2	0.639696		588.094	10684.6		588.094	6258.27		588.094	10989.8		588.094	8763.73		588.094	11383.1		588.094	8564.85		588.094	17570.1		588.094	12823.2		588.094	5840.85		588.094	15360.9		588.094	13725.6		588.094	8701.35		588.094	10924.6		588.094	5214		588.094	12196.2		588.094
589.963	11845.4	0.642203		589.963	10671.4		589.963	6280.66		589.963	10974.5		589.963	8785.1		589.963	11349.6		589.963	8575.22		589.963	17556.1		589.963	12830.7		589.963	5826.78		589.963	15398		589.963	13740.1		589.963	8667.51		589.963	10927.7		589.963	5235.11		589.963	12191.7		589.963
591.829	11872.2	0.643656		591.829	10726.2		591.829	6287.49		591.829	11043.5		591.829	8773.98		591.829	11403.1		591.829	8575.78		591.829	17619.8		591.829	12839.4		591.829	5874.58		591.829	15440.4		591.829	13784.6		591.829	8672.45		591.829	10919.4		591.829	5262.37		591.829	12203.1		591.829
593.697	11826.2	0.64116		593.697	10718.9		593.697	6257.96		593.697	11086.2		593.697	8807.99		593.697	11445.8		593.697	8582.96		593.697	17619.6		593.697	12830.9		593.697	5866.11		593.697	15517.7		593.697	13769.8		593.697	8730.09		593.697	10979.9		593.697	5264.85		593.697	12240.4		593.697
595.562	11885.9	0.644396		595.562	10784.7		595.562	6305.37		595.562	11078.3		595.562	8870.57		595.562	11459.8		595.562	8593.75		595.562	17656.4		595.562	12904.3		595.562	5892.76		595.562	15497.9		595.562	13799.8		595.562	8733.77		595.562	10961.2		595.562	5235.71		595.562	12234.1		595.562
597.43	11906.1	0.645493		597.43	10781.6		597.43	6300.1		597.43	11082		597.43	8876.98		597.43	11466.3		597.43	8615.05		597.43	17720.7		597.43	12909.6		597.43	5895.52		597.43	15445.2		597.43	13861.4		597.43	8730.08		597.43	10982.1		597.43	5271.2		597.43	12269.6		597.43
599.294	11905.8	0.645474		599.294	10777		599.294	6330.71		599.294	11122.4		599.294	8862.58		599.294	11480		599.294	8604.24		599.294	17729.9		599.294	12934		599.294	5896.68		599.294	15565		599.294	13935.7		599.294	8770.77		599.294	11001.2		599.294	5292.51		599.294	12330.7		599.294
601.159	11942.4	0.64746		601.159	10807.7		601.159	6318.59		601.159	11170.3		601.159	8908.19		601.159	11532.2		601.159	8690.76		601.159	17751.5		601.159	12986.4		601.159	5914.21		601.159	15533.4		601.159	13929		601.159	8760.05		601.159	11008.9		601.159	5284.48		601.159	12304.5		601.159
603.025	11995.6	0.650343		603.025	10842.6		603.025	6337.87		603.025	11181.2		603.025	8892.98		603.025	11606.3		603.025	8682.83		603.025	17814.8		603.025	13016.8		603.025	5929.91		603.025	15615.4		603.025	13975.6		603.025	8819.88		603.025	11038.9		603.025	5312.65		603.025	12330.4		603.025
604.888	12011.9	0.651226		604.888	10837.4		604.888	6335.65		604.888	11177.1		604.888	8880.23		604.888	11560.2		604.888	8675.74		604.888	17824.5		604.888	13018.8		604.888	5927.49		604.888	15589.2		604.888	13957.7		604.888	8807.12		604.888	11014		604.888	5283.47		604.888	12351.2		604.888
606.754	11994.6	0.650289		606.754	10848.8		606.754	6377.55		606.754	11185.6		606.754	8905.99		606.754	11603.3		606.754	8711.48		606.754	17849		606.754	12985		606.754	5945.85		606.754	15659.1		606.754	13967.8		606.754	8793.25		606.754	11055		606.754	5313.11		606.754	12369.2		606.754
608.616	12020.7	0.651707		608.616	10834.7		608.616	6358.94		608.616	11178		608.616	8924.37		608.616	11629		608.616	8712.92		608.616	17855.7		608.616	13037.1		608.616	5988.42		608.616	15671.8		608.616	13972.1		608.616	8834.91		608.616	11089.2		608.616	5324.45		608.616	12410.4		608.616
610.479	12034.9	0.652476		610.479	10907.9		610.479	6368.58		610.479	11228		610.479	8953.57		610.479	11699.6		610.479	8746.57		610.479	17863		610.479	13045.5		610.479	5973.56		610.479	15704.3		610.479	14010.7		610.479	8845.59		610.479	11101.6		610.479	5360.69		610.479	12402.8		610.479
612.343	12098.8	0.655939		612.343	10903.7		612.343	6369.59		612.343	11170.2		612.343	8928.1		612.343	11736.5		612.343	8729.32		612.343	17895		612.343	13055.6		612.343	5965.35		612.343	15738.7		612.343	14059.4		612.343	8849.52		612.343	11173.7		612.343	5365.15		612.343	12417.5		612.343
614.205	12096	0.655791		614.205	10920.7		614.205	6402.13		614.205	11265		614.205	8988.72		614.205	11770.5		614.205	8731.09		614.205	17982.5		614.205	13128.4		614.205	5991.47		614.205	15737.5		614.205	14062.7		614.205	8890.24		614.205	11095.4		614.205	5411.46		614.205	12477		614.205
616.068	12111.2	0.656614		616.068	10939.2		616.068	6414.28		616.068	11268.4		616.068	8999.48		616.068	11846.5		616.068	8769.46		616.068	17952.7		616.068	13115.8		616.068	6002.82		616.068	15748.1		616.068	14060.8		616.068	8885.06		616.068	11178.1		616.068	5407.03		616.068	12471.6		616.068
617.929	12125.1	0.657366		617.929	10969.2		617.929	6444.29		617.929	11262.6		617.929	9029.85		617.929	11851.2		617.929	8773.05		617.929	17930		617.929	13140.3		617.929	6001.45		617.929	15754.7		617.929	14102.2		617.929	8910.1		617.929	11187.7		617.929	5426.2		617.929	12504.5		617.929
619.79	12168.2	0.659702		619.79	11003.3		619.79	6443.03		619.79	11292.9		619.79	9063.35		619.79	11928.8		619.79	8810.73		619.79	18078.5		619.79	13248.1		619.79	6023.98		619.79	15873.9		619.79	14144.9		619.79	8936.49		619.79	11186.5		619.79	5434.96		619.79	12555.3		619.79
621.652	12182.4	0.660473		621.652	11008.8		621.652	6439.43		621.652	11352.6		621.652	9041.19		621.652	11973.8		621.652	8814.11		621.652	18032.5		621.652	13162.1		621.652	6038.3		621.652	15845.3		621.652	14180.7		621.652	8905.84		621.652	11209.1		621.652	5424.53		621.652	12565.6		621.652
623.512	12237.4	0.663456		623.512	11044.7		623.512	6445.02		623.512	11328.8		623.512	9033.07		623.512	12012.5		623.512	8832.7		623.512	18098		623.512	13221.9		623.512	6054.04		623.512	15839.1		623.512	14139.5		623.512	8952.76		623.512	11220.3		623.512	5405.84		623.512	12565.8		623.512
625.371	12237.2	0.663441		625.371	11025.8		625.371	6433.09		625.371	11337.1		625.371	9059.37		625.371	12059.2		625.371	8836.79		625.371	18072.3		625.371	13213.2		625.371	6056.55		625.371	15878.6		625.371	14208.3		625.371	8946.67		625.371	11232.6		625.371	5422.41		625.371	12558.8		625.371
627.233	12239.7	0.663577		627.233	10976.4		627.233	6461.19		627.233	11402.1		627.233	9083.49		627.233	12115.8		627.233	8829.48		627.233	18084.7		627.233	13253.2		627.233	6059.34		627.233	15966.6		627.233	14163.9		627.233	8992.47		627.233	11264		627.233	5399.28		627.233	12538.8		627.233
629.091	12262.1	0.664791		629.091	11093.7		629.091	6510.19		629.091	11383.5		629.091	9092.72		629.091	12148		629.091	8836.26		629.091	18160.6		629.091	13296.6		629.091	6060.81		629.091	15926.1		629.091	14241.2		629.091	8966.68		629.091	11304.9		629.091	5440.17		629.091	12592.8		629.091
630.95	12247.9	0.664023		630.95	11050.5		630.95	6502.02		630.95	11428.2		630.95	9104.73		630.95	12182.1		630.95	8903.49		630.95	18163.3		630.95	13322.1		630.95	6061.62		630.95	15953.8		630.95	14272.8		630.95	9003.82		630.95	11255.8		630.95	5394.91		630.95	12581		630.95
632.81	12234.8	0.663313		632.81	11089.2		632.81	6498.91		632.81	11401.1		632.81	9144.48		632.81	12220.6		632.81	8872.79		632.81	18155.8		632.81	13278.7		632.81	6076.18		632.81	15951.9		632.81	14272		632.81	9003.35		632.81	11317.2		632.81	5407.43		632.81	12602.2		632.81
634.668	12282.5	0.665899		634.668	11163.4		634.668	6483.96		634.668	11427.8		634.668	9125.74		634.668	12231.1		634.668	8855.79		634.668	18167.6		634.668	13337.4		634.668	6076.71		634.668	16001.8		634.668	14306.2		634.668	9023.38		634.668	11327.7		634.668	5435.02		634.668	12679.9		634.668
636.525	12272.5	0.665358		636.525	11166.2		636.525	6496.32		636.525	11440.5		636.525	9188.85		636.525	12234.7		636.525	8865.76		636.525	18211.2		636.525	13348.1		636.525	6101.68		636.525	16024.5		636.525	14331.8		636.525	9055.54		636.525	11359.6		636.525	5430.28		636.525	12676.3		636.525
638.382	12322.1	0.668044		638.382	11145.1		638.382	6551.38		638.382	11512.2		638.382	9166.02		638.382	12305.2		638.382	8909.86		638.382	18229		638.382	13412.8		638.382	6143.31		638.382	16126.9		638.382	14356.9		638.382	9061.43		638.382	11383.2		638.382	5427.87		638.382	12711.8		638.382
640.241	12298.6	0.666775		640.241	11077.8		640.241	6531.17		640.241	11497.5		640.241	9157.44		640.241	12240.9		640.241	8914.97		640.241	18291.3		640.241	13397.7		640.241	6113.08		640.241	16025.5		640.241	14324.6		640.241	9045.58		640.241	11371.9		640.241	5443.32		640.241	12681.6		640.241
642.097	12334.9	0.668742		642.097	11194.3		642.097	6526.54		642.097	11469		642.097	9204.73		642.097	12286		642.097	8945.55		642.097	18259.6		642.097	13382.1		642.097	6127.34		642.097	16119.6		642.097	14358.8		642.097	9070.08		642.097	11374.3		642.097	5454.62		642.097	12742.4		642.097
643.953	12322.4	0.668062		643.953	11214.2		643.953	6541.34		643.953	11548.6		643.953	9174.9		643.953	12223.2		643.953	8932.64		643.953	18303.2		643.953	13425.1		643.953	6126.59		643.953	16127.3		643.953	14412.7		643.953	9039.49		643.953	11418.8		643.953	5457.99		643.953	12746.8		643.953
645.808	12361.9	0.670203		645.808	11182.4		645.808	6528.78		645.808	11516.6		645.808	9219.32		645.808	12247.1		645.808	8910.29		645.808	18332.7		645.808	13399		645.808	6141.05		645.808	16080		645.808	14398.5		645.808	9075.61		645.808	11441.3		645.808	5431.79		645.808	12745.1		645.808
647.665	12380.4	0.671206		647.665	11214.5		647.665	6567.31		647.665	11534.4		647.665	9197.64		647.665	12240.1		647.665	8949.4		647.665	18362.3		647.665	13432.7		647.665	6162.12		647.665	16200.5		647.665	14406		647.665	9094.83		647.665	11443.9		647.665	5452.64		647.665	12774.6		647.665
649.52	12359.4	0.670067		649.52	11195.4		649.52	6538.74		649.52	11543.4		649.52	9175.98		649.52	12144		649.52	8944.22		649.52	18343.1		649.52	13406.6		649.52	6156.7		649.52	16194.2		649.52	14414.9		649.52	9102.97		649.52	11414.7		649.52	5454.88		649.52	12781.5		649.52
651.374	12406.9	0.672642		651.374	11210		651.374	6570.51		651.374	11546.5		651.374	9240.19		651.374	12187.5		651.374	9005.89		651.374	18377.1		651.374	13428.8		651.374	6145.67		651.374	16221.9		651.374	14442.4		651.374	9083.81		651.374	11467		651.374	5463.07		651.374	12764.8		651.374
653.228	12481.4	0.676685		653.228	11195		653.228	6539.99		653.228	11553.5		653.228	9260.32		653.228	12104.4		653.228	8979.32		653.228	18343.7		653.228	13523.7		653.228	6185.41		653.228	16263.1		653.228	14473.1		653.228	9098.77		653.228	11524.9		653.228	5482.28		653.228	12848.6		653.228
655.084	12451.5	0.675059		655.084	11264.5		655.084	6570.53		655.084	11593.1		655.084	9266.1		655.084	12110.6		655.084	8959.24		655.084	18377.1		655.084	13514.3		655.084	6172.46		655.084	16309.7		655.084	14532.1		655.084	9133.65		655.084	11451.2		655.084	5488.4		655.084	12822.4		655.084
656.937	12439.1	0.674391		656.937	11235.1		656.937	6599.69		656.937	11605		656.937	9253.44		656.937	12134.9		656.937	9023.54		656.937	18425.9		656.937	13490		656.937	6166.55		656.937	16291.7		656.937	14515.6		656.937	9140.36		656.937	11464		656.937	5501.12		656.937	12871.7		656.937
658.79	12443.5	0.674629		658.79	11269.7		658.79	6592.01		658.79	11609.7		658.79	9281.1		658.79	12124.7		658.79	9022.21		658.79	18443		658.79	13554.7		658.79	6206.22		658.79	16282		658.79	14540.5		658.79	9141.17		658.79	11550.1		658.79	5495.3		658.79	12842		658.79
660.643	12465.5	0.675821		660.643	11323.7		660.643	6586.84		660.643	11624.6		660.643	9248.16		660.643	12123.9		660.643	8994.85		660.643	18440.7		660.643	13539.6		660.643	6179.26		660.643	16234.5		660.643	14580.9		660.643	9149.9		660.643	11542.5		660.643	5510.95		660.643	12868.8		660.643
662.495	12551.3	0.680473		662.495	11332.9		662.495	6621.86		662.495	11665.8		662.495	9294.62		662.495	12110.8		662.495	9043.05		662.495	18507.5		662.495	13585.2		662.495	6229.14		662.495	16369.2		662.495	14598.5		662.495	9167.04		662.495	11519.7		662.495	5538.44		662.495	12932.9		662.495
664.349	12513.6	0.678427		664.349	11363.9		664.349	6604.23		664.349	11639.2		664.349	9316.52		664.349	12062.3		664.349	9064.38		664.349	18483		664.349	13563.9		664.349	6221.81		664.349	16341.2		664.349	14622.1		664.349	9154.94		664.349	11574.8		664.349	5553.3		664.349	12902.7		664.349
666.2	12566.1	0.681273		666.2	11394.8		666.2	6619.81		666.2	11652.5		666.2	9319.35		666.2	12070.3		666.2	9066.33		666.2	18509.2		666.2	13573.1		666.2	6234.21		666.2	16394		666.2	14616		666.2	9178.2		666.2	11614.4		666.2	5553.6		666.2	12912.5		666.2
668.051	12498.1	0.677588		668.051	11377.1		668.051	6631.53		668.051	11663.5		668.051	9329.24		668.051	12079.9		668.051	9067.82		668.051	18573.8		668.051	13646.1		668.051	6232.97		668.051	16419.4		668.051	14592.9		668.051	9162.89		668.051	11594.1		668.051	5561.2		668.051	12937.5		668.051
669.902	12533.7	0.679521		669.902	11360.5		669.902	6598.65		669.902	11683.8		669.902	9322.73		669.902	12054.7		669.902	9092.89		669.902	18515.8		669.902	13564.9		669.902	6215.79		669.902	16428.3		669.902	14609.8		669.902	9170.24		669.902	11546.2		669.902	5603.27		669.902	12923.8		669.902
671.752	12507.9	0.678117		671.752	11353.9		671.752	6622.62		671.752	11650.3		671.752	9275.4		671.752	12061.3		671.752	9022.71		671.752	18505		671.752	13603.6		671.752	6198.39		671.752	16420.1		671.752	14647		671.752	9194.8		671.752	11599		671.752	5598.77		671.752	12929.9		671.752
673.604	12541.4	0.679937		673.604	11401.9		673.604	6620.62		673.604	11695		673.604	9357.6		673.604	12039.5		673.604	9064.3		673.604	18553		673.604	13596.6		673.604	6246.54		673.604	16423.3		673.604	14626.2		673.604	9202.15		673.604	11579.3		673.604	5585.08		673.604	12951.6		673.604
675.454	12595.9	0.682893		675.454	11400.6		675.454	6639.81		675.454	11733.6		675.454	9364.94		675.454	12081.9		675.454	9135.23		675.454	18643.2		675.454	13701		675.454	6253.61		675.454	16436.8		675.454	14717.1		675.454	9237.25		675.454	11626.3		675.454	5575.05		675.454	12974.2		675.454
677.303	12631.4	0.684814		677.303	11392.7		677.303	6643.81		677.303	11766.3		677.303	9388.77		677.303	12094.7		677.303	9083.68		677.303	18674.7		677.303	13714.8		677.303	6273.24		677.303	16451.5		677.303	14732		677.303	9238.59		677.303	11648.6		677.303	5609.44		677.303	12974.6		677.303
679.152	12586.6	0.682386		679.152	11445.2		679.152	6635.36		679.152	11773.8		679.152	9390.23		679.152	12104.4		679.152	9125.79		679.152	18614.5		679.152	13689.6		679.152	6295.17		679.152	16495.7		679.152	14734.1		679.152	9269.64		679.152	11657.6		679.152	5573.63		679.152	13042.4		679.152
681.001	12637.8	0.68516		681.001	11458.4		681.001	6671.59		681.001	11782.4		681.001	9363.9		681.001	12097.5		681.001	9110.54		681.001	18680.8		681.001	13741.6		681.001	6269.15		681.001	16554.4		681.001	14797.7		681.001	9235.39		681.001	11701.4		681.001	5573.86		681.001	13036		681.001
682.849	12603.6	0.683308		682.849	11494.7		682.849	6666.87		682.849	11783.6		682.849	9406.48		682.849	12094.1		682.849	9133.74		682.849	18644.7		682.849	13699.7		682.849	6290.12		682.849	16515.6		682.849	14787.2		682.849	9287.53		682.849	11727.6		682.849	5556.92		682.849	13010.5		682.849
684.697	12624.9	0.684465		684.697	11401.1		684.697	6675.97		684.697	11787.1		684.697	9385.4		684.697	12034.6		684.697	9132.3		684.697	18620		684.697	13695.6		684.697	6268.8		684.697	16512.4		684.697	14744.3		684.697	9245.49		684.697	11674.4		684.697	5552.49		684.697	13029		684.697
686.544	12653	0.685985		686.544	11483		686.544	6686		686.544	11770.2		686.544	9400.85		686.544	12083.6		686.544	9143.97		686.544	18663.2		686.544	13767.8		686.544	6304.57		686.544	16503.8		686.544	14745.4		686.544	9283.57		686.544	11734.7		686.544	5557.41		686.544	13058.7		686.544
688.391	12726.1	0.68995		688.391	11507.5		688.391	6714.48		688.391	11836.7		688.391	9425.44		688.391	12111.5		688.391	9130.44		688.391	18748.8		688.391	13794.7		688.391	6316.5		688.391	16628.5		688.391	14828.7		688.391	9312.99		688.391	11791.3		688.391	5562.78		688.391	13087.4		688.391
690.24	12765.8	0.6921		690.24	11511.4		690.24	6743.53		690.24	11845.8		690.24	9478.6		690.24	12098		690.24	9213.33		690.24	18790.9		690.24	13811.4		690.24	6320.44		690.24	16632.4		690.24	14892.7		690.24	9346.44		690.24	11807.8		690.24	5605.77		690.24	13130		690.24
692.086	12760.9	0.691835		692.086	11581.3		692.086	6709.42		692.086	11889		692.086	9512.87		692.086	12140.6		692.086	9251.5		692.086	18821.6		692.086	13816		692.086	6321.91		692.086	16672.3		692.086	14885.8		692.086	9352.4		692.086	11776.3		692.086	5616.03		692.086	13123.2		692.086
693.932	12813.6	0.694691		693.932	11544.1		693.932	6740.63		693.932	11894.4		693.932	9517.99		693.932	12182.7		693.932	9214.2		693.932	18898.7		693.932	13877.6		693.932	6355.58		693.932	16711.6		693.932	14945.8		693.932	9380.5		693.932	11810.7		693.932	5634.41		693.932	13178.6		693.932
695.778	12781.2	0.692936		695.778	11613.7		695.778	6741.93		695.778	11906.5		695.778	9543.4		695.778	12143.7		695.778	9256.22		695.778	18865.4		695.778	13909.9		695.778	6354.2		695.778	16691.4		695.778	14913		695.778	9396.37		695.778	11860.6		695.778	5633.16		695.778	13216.5		695.778
697.623	13013.5	0.705529		697.623	11729.6		697.623	6817.58		697.623	11992.1		697.623	9752.4		697.623	12218.5		697.623	9405.57		697.623	19007.5		697.623	14044.9		697.623	6401.1		697.623	16892.9		697.623	15072.7		697.623	9396.96		697.623	11972.3		697.623	5648.52		697.623	13369.1		697.623
699.468	13241.3	0.71788		699.468	11974		699.468	6931.56		699.468	12119.2		699.468	9970.44		699.468	12281.1		699.468	9603.45		699.468	19225		699.468	14212		699.468	6478.51		699.468	17033.6		699.468	15302.9		699.468	9534.7		699.468	12076.8		699.468	5661.98		699.468	13620.4		699.468
701.312	13444.3	0.728888		701.312	12200.2		701.312	7000.3		701.312	12217.1		701.312	10212.9		701.312	12310.8		701.312	9789.82		701.312	19380.8		701.312	14371.8		701.312	6512.94		701.312	17106		701.312	15417.1		701.312	9634.77		701.312	12237.7		701.312	5677.72		701.312	13835.1		701.312
703.156	13630.7	0.738993		703.156	12263.3		703.156	7076.19		703.156	12356.5		703.156	10428.7		703.156	12395.1		703.156	9906.78		703.156	19537.7		703.156	14607		703.156	6590.54		703.156	17215.5		703.156	15547.9		703.156	9756.33		703.156	12357.4		703.156	5667.19		703.156	13948.9		703.156
705	13626	0.738738		705	12251.3		705	7018.1		705	12284.9		705	10390.4		705	12372		705	9910.23		705	19511.1		705	14557.2		705	6556.92		705	17129.3		705	15552.1		705	9784.41		705	12301.2		705	5677.48		705	13995.3		705
706.844	13503.1	0.732075		706.844	12157.2		706.844	6995.16		706.844	12253.3		706.844	10210.3		706.844	12377.4		706.844	9804.66		706.844	19422.3		706.844	14476.3		706.844	6534.67		706.844	17072.9		706.844	15453.7		706.844	9746.84		706.844	12271.1		706.844	5689.88		706.844	13834.8		706.844
708.687	13185.8	0.714872		708.687	11892.2		708.687	6863.12		708.687	12127.2		708.687	9958.69		708.687	12295.6		708.687	9548.69		708.687	19173		708.687	14280.4		708.687	6462.72		708.687	16939.7		708.687	15236		708.687	9575.57		708.687	12142.7		708.687	5664.51		708.687	13505.4		708.687
710.529	13052.6	0.707649		710.529	11776.4		710.529	6861.71		710.529	12080.8		710.529	9772.65		710.529	12260.3		710.529	9410.13		710.529	19114.4		710.529	14063.2		710.529	6445.84		710.529	16977.2		710.529	15126.1		710.529	9515.77		710.529	12062.6		710.529	5663.04		710.529	13404.6		710.529
712.372	12952.3	0.702212		712.372	11733.8		712.372	6816.03		712.372	12033.7		712.372	9657.57		712.372	12263.6		712.372	9357.36		712.372	19039.9		712.372	14032.7		712.372	6449.33		712.372	16928.7		712.372	15141		712.372	9510.19		712.372	11937.3		712.372	5691.48		712.372	13329.3		712.372
714.214	12965.1	0.702908		714.214	11710.1		714.214	6826.83		714.214	12038.6		714.214	9642.28		714.214	12251.3		714.214	9359.51		714.214	19053.1		714.214	14055.6		714.214	6419.29		714.214	16878.8		714.214	15168.2		714.214	9472.28		714.214	11951.8		714.214	5706.94		714.214	13300.1		714.214
716.055	12983.8	0.703921		716.055	11713.8		716.055	6833.51		716.055	12066.1		716.055	9655.07		716.055	12259.6		716.055	9358.1		716.055	19088.8		716.055	14033.1		716.055	6418.34		716.055	16907.5		716.055	15134.8		716.055	9488.38		716.055	11963.2		716.055	5709.16		716.055	13339.1		716.055
717.896	12949.7	0.702072		717.896	11710.3		717.896	6806.31		717.896	12064.1		717.896	9647.37		717.896	12280.3		717.896	9370.73		717.896	19106.6		717.896	14072.5		717.896	6448.78		717.896	16942.1		717.896	15171.4		717.896	9475.57		717.896	12055		717.896	5702.03		717.896	13321.1		717.896
719.737	12984.8	0.703975		719.737	11753.5		719.737	6823.22		719.737	12076.5		719.737	9670.86		719.737	12304.4		719.737	9366.4		719.737	19026.7		719.737	14066.4		719.737	6442.72		719.737	16977		719.737	15127		719.737	9523.17		719.737	12036.6		719.737	5712.7		719.737	13354.2		719.737
721.578	12996.4	0.704606		721.578	11785.5		721.578	6840.51		721.578	12081.3		721.578	9670.19		721.578	12307.8		721.578	9374.45		721.578	19135.9		721.578	14093.9		721.578	6452.54		721.578	17010.5		721.578	15193.3		721.578	9528.05		721.578	12006.5		721.578	5717.15		721.578	13373.6		721.578
723.418	13023.2	0.706054		723.418	11781.1		723.418	6865.67		723.418	12108.6		723.418	9639.12		723.418	12295.7		723.418	9359.45		723.418	19133.8		723.418	14163.1		723.418	6461.61		723.418	17022.7		723.418	15149.1		723.418	9495.22		723.418	12018.8		723.418	5717.39		723.418	13386.8		723.418
725.258	13021.6	0.705968		725.258	11817.5		725.258	6838		725.258	12123.7		725.258	9676.44		725.258	12324.2		725.258	9360.53		725.258	19075.7		725.258	14111.7		725.258	6466.85		725.258	17078.6		725.258	15209.8		725.258	9522.48		725.258	12033.3		725.258	5737.58		725.258	13406.9		725.258
727.097	13031.2	0.706492		727.097	11768.9		727.097	6832.22		727.097	12130.9		727.097	9683.4		727.097	12344.6		727.097	9393.34		727.097	19175.8		727.097	14117.8		727.097	6483.01		727.097	17056.3		727.097	15224.8		727.097	9534.91		727.097	12045.2		727.097	5721.99		727.097	13407.6		727.097
728.936	13050.5	0.707537		728.936	11814.7		728.936	6841.71		728.936	12156.1		728.936	9707.37		728.936	12367.6		728.936	9410.59		728.936	19227.1		728.936	14151.6		728.936	6492.29		728.936	17086.1		728.936	15244.1		728.936	9530.56		728.936	12081.7		728.936	5760.45		728.936	13439.1		728.936
730.775	13043.3	0.707147		730.775	11852.3		730.775	6893.8		730.775	12211.2		730.775	9723.51		730.775	12373.9		730.775	9440.77		730.775	19239.8		730.775	14196.1		730.775	6521.72		730.775	17054.8		730.775	15279.5		730.775	9550.02		730.775	12119		730.775	5746.39		730.775	13484.1		730.775
732.613	13135	0.712117		732.613	11891.3		732.613	6858.42		732.613	12186.8		732.613	9734.07		732.613	12388.4		732.613	9420.79		732.613	19256.3		732.613	14179.3		732.613	6534.29		732.613	17098.6		732.613	15260.7		732.613	9585.11		732.613	12093.5		732.613	5777.65		732.613	13521.1		732.613
734.451	13083.4	0.70932		734.451	11925.4		734.451	6880.54		734.451	12196.6		734.451	9762.6		734.451	12432.3		734.451	9488.34		734.451	19255.7		734.451	14196.7		734.451	6538.14		734.451	17181.1		734.451	15326.1		734.451	9572.7		734.451	12167.4		734.451	5742.62		734.451	13480.5		734.451
736.289	13113	0.710928		736.289	11937.5		736.289	6909.07		736.289	12251.1		736.289	9758.52		736.289	12414.7		736.289	9460.1		736.289	19339.1		736.289	14241.3		736.289	6538.07		736.289	17230.1		736.289	15372.1		736.289	9604.08		736.289	12121.1		736.289	5793.16		736.289	13537.4		736.289
738.126	13162.7	0.713619		738.126	11912.7		738.126	6903.13		738.126	12270.8		738.126	9790.19		738.126	12489.1		738.126	9472.03		738.126	19357.1		738.126	14276.2		738.126	6518.34		738.126	17195.7		738.126	15366.4		738.126	9624.31		738.126	12198.2		738.126	5806.83		738.126	13515.6		738.126
739.961	13161.9	0.713576		739.961	11929.5		739.961	6895.03		739.961	12304.5		739.961	9793.73		739.961	12471.9		739.961	9511.93		739.961	19365.1		739.961	14324.3		739.961	6551.86		739.961	17247.2		739.961	15378		739.961	9645.15		739.961	12253.3		739.961	5807.99		739.961	13608.4		739.961
741.797	13102.7	0.710366		741.797	11947.9		741.797	6941.47		741.797	12283.6		741.797	9738.02		741.797	12409.3		741.797	9501.66		741.797	19296.1		741.797	14318.1		741.797	6549.64		741.797	17194.8		741.797	15375.5		741.797	9613.72		741.797	12170.1		741.797	5797.67		741.797	13566		741.797
743.634	13181.7	0.714648		743.634	11950.1		743.634	6959.99		743.634	12290.7		743.634	9763.9		743.634	12483		743.634	9553.92		743.634	19379		743.634	14308.9		743.634	6559.35		743.634	17273.4		743.634	15441.8		743.634	9656.29		743.634	12210.4		743.634	5798.41		743.634	13569		743.634
745.469	13161.8	0.713571		745.469	11921.8		745.469	6924.66		745.469	12282.8		745.469	9800.87		745.469	12513.7		745.469	9518.59		745.469	19402		745.469	14310.5		745.469	6587.77		745.469	17230.1		745.469	15428.3		745.469	9649.37		745.469	12215.9		745.469	5805.39		745.469	13621.6		745.469
747.305	13213.5	0.716372		747.305	12000.4		747.305	6966.85		747.305	12345.6		747.305	9840.6		747.305	12538.1		747.305	9546.16		747.305	19452.5		747.305	14348.3		747.305	6593.9		747.305	17328.8		747.305	15493		747.305	9693.15		747.305	12266.3		747.305	5836.51		747.305	13657		747.305
749.14	13250.4	0.718375		749.14	12025.6		749.14	6971.43		749.14	12363.3		749.14	9823.1		749.14	12554.6		749.14	9585.94		749.14	19518.5		749.14	14365.7		749.14	6599.5		749.14	17320.2		749.14	15541		749.14	9706.84		749.14	12299.5		749.14	5854.7		749.14	13671.4		749.14
750.975	13304.8	0.721325		750.975	11959.9		750.975	6967.84		750.975	12433.8		750.975	9879.15		750.975	12597		750.975	9585.41		750.975	19546.2		750.975	14418.5		750.975	6635.13		750.975	17432.6		750.975	15568.1		750.975	9713.1		750.975	12310.4		750.975	5849.23		750.975	13691.5		750.975
752.809	13313.6	0.721802		752.809	12029		752.809	6965.98		752.809	12398		752.809	9855.94		752.809	12578		752.809	9556.24		752.809	19560.6		752.809	14470.1		752.809	6608.21		752.809	17402.1		752.809	15546.5		752.809	9758.35		752.809	12293.4		752.809	5854.66		752.809	13681.5		752.809
754.641	13320.9	0.722196		754.641	12072		754.641	6998.84		754.641	12437.6		754.641	9917.2		754.641	12629.9		754.641	9627.72		754.641	19570.2		754.641	14475.6		754.641	6607.1		754.641	17495.8		754.641	15563.6		754.641	9778.19		754.641	12347.8		754.641	5867.91		754.641	13778		754.641
756.475	13356.8	0.724142		756.475	12101.5		756.475	6995.61		756.475	12454.9		756.475	9925.44		756.475	12614.4		756.475	9628.66		756.475	19639.3		756.475	14474.9		756.475	6657.58		756.475	17493.2		756.475	15626.7		756.475	9754.16		756.475	12327.8		756.475	5857.95		756.475	13762.9		756.475
758.308	13373.3	0.725035		758.308	12116.6		758.308	6996.18		758.308	12464.3		758.308	9942.24		758.308	12695.4		758.308	9638.98		758.308	19657.4		758.308	14515.4		758.308	6690		758.308	17541		758.308	15657.1		758.308	9804.08		758.308	12389.5		758.308	5906.08		758.308	13791.8		758.308
760.141	13415	0.7273		760.141	12135.1		760.141	7022.16		760.141	12490.2		760.141	9947.79		760.141	12720.3		760.141	9663.29		760.141	19680.8		760.141	14537.4		760.141	6709.38		760.141	17576.7		760.141	15672.3		760.141	9840.7		760.141	12399.6		760.141	5886.75		760.141	13842.1		760.141
761.974	13410.8	0.72707		761.974	12157.4		761.974	7023.51		761.974	12520.5		761.974	10005.7		761.974	12671.1		761.974	9679.25		761.974	19659.7		761.974	14549.4		761.974	6693.37		761.974	17557.8		761.974	15647.7		761.974	9813.74		761.974	12462.6		761.974	5910.5		761.974	13852.5		761.974
763.806	13413.6	0.727222		763.806	12151.3		763.806	7049.21		763.806	12516.3		763.806	10017.1		763.806	12707.8		763.806	9686.2		763.806	19735.1		763.806	14580.4		763.806	6702.11		763.806	17674.6		763.806	15754		763.806	9815.06		763.806	12455.4		763.806	5921.39		763.806	13846.5		763.806
765.635	13401.5	0.726568		765.635	12148.1		765.635	7073.53		765.635	12555		765.635	9960.82		765.635	12721.5		765.635	9688.68		765.635	19755.6		765.635	14593.6		765.635	6714.82		765.635	17660.1		765.635	15770		765.635	9824.41		765.635	12465.9		765.635	5924.48		765.635	13874.2		765.635
767.467	13516	0.732774		767.467	12231.4		767.467	7081.43		767.467	12569.9		767.467	10045.1		767.467	12777.1		767.467	9727.42		767.467	19795.7		767.467	14697.1		767.467	6710.52		767.467	17735.8		767.467	15829.3		767.467	9877.81		767.467	12462.3		767.467	5950.27		767.467	13909.8		767.467
769.298	13506.1	0.732237		769.298	12246		769.298	7101.07		769.298	12636.3		769.298	10036.1		769.298	12795.4		769.298	9775.76		769.298	19881.3		769.298	14674.3		769.298	6763.13		769.298	17766.7		769.298	15831.9		769.298	9880.03		769.298	12572.2		769.298	5959.07		769.298	13952.3		769.298
771.129	13539.3	0.734037		771.129	12268.4		771.129	7097.68		771.129	12664.5		771.129	10086.9		771.129	12801.4		771.129	9782.72		771.129	19950.9		771.129	14776.7		771.129	6770.94		771.129	17777.1		771.129	15848.6		771.129	9919.95		771.129	12572.5		771.129	5969.48		771.129	13945.7		771.129
772.959	13548.3	0.734527		772.959	12352.1		772.959	7143.53		772.959	12704.6		772.959	10089.6		772.959	12844.4		772.959	9799.87		772.959	19958.2		772.959	14751.7		772.959	6803.99		772.959	17848.1		772.959	15895		772.959	9939.13		772.959	12613.5		772.959	5999.47		772.959	14028.7		772.959
774.787	13585.2	0.736525		774.787	12309.9		774.787	7128.14		774.787	12696.4		774.787	10093.6		774.787	12834.9		774.787	9785.3		774.787	19954		774.787	14768.2		774.787	6790.95		774.787	17862.6		774.787	15938.8		774.787	9954.2		774.787	12642.5		774.787	5993.88		774.787	13982.9		774.787
776.617	13616.5	0.738223		776.617	12312.6		776.617	7148.02		776.617	12725.7		776.617	10117.4		776.617	12932.4		776.617	9829.01		776.617	20021.8		776.617	14734.1		776.617	6790.33		776.617	17882		776.617	15928.2		776.617	9959.63		776.617	12568.9		776.617	5986.1		776.617	14046.6		776.617
778.446	13575.9	0.736023		778.446	12397.1		778.446	7178.86		778.446	12744.8		778.446	10136		778.446	12909.2		778.446	9815.49		778.446	20049.7		778.446	14864.9		778.446	6823.81		778.446	17916.5		778.446	15977.3		778.446	10000.7		778.446	12671.2		778.446	5999.3		778.446	14079.7		778.446
780.275	13687.7	0.742081		780.275	12370.8		780.275	7221.07		780.275	12816.7		780.275	10191.3		780.275	12968.1		780.275	9888.93		780.275	20164.1		780.275	14910.5		780.275	6850.37		780.275	17974.5		780.275	16056.5		780.275	10033.3		780.275	12700.5		780.275	6013		780.275	14126		780.275
782.102	13724.4	0.744073		782.102	12445.1		782.102	7211.37		782.102	12849.4		782.102	10252.6		782.102	13029.4		782.102	9886.76		782.102	20175.9		782.102	14896.9		782.102	6875.64		782.102	18048.5		782.102	16089.6		782.102	10063		782.102	12764.1		782.102	6042.76		782.102	14186.4		782.102
783.93	13756.1	0.745789		783.93	12461.4		783.93	7233.48		783.93	12809.3		783.93	10241.4		783.93	13036.3		783.93	9918.24		783.93	20197.8		783.93	14908		783.93	6863.13		783.93	18084.6		783.93	16104.1		783.93	10058		783.93	12727.7		783.93	6079.61		783.93	14174.1		783.93
785.758	13746.3	0.745259		785.758	12491.8		785.758	7228.1		785.758	12867.6		785.758	10277.9		785.758	13038.1		785.758	9917.3		785.758	20282.5		785.758	15012.8		785.758	6881.34		785.758	18167.3		785.758	16203.3		785.758	10072.7		785.758	12800.2		785.758	6083.64		785.758	14247.4		785.758
787.585	13808	0.748606		787.585	12482.5		787.585	7262.81		787.585	12882		787.585	10224.6		787.585	13032.8		787.585	9908.3		787.585	20304.4		787.585	15022.6		787.585	6871.37		787.585	18170.9		787.585	16222.4		787.585	10109.6		787.585	12838.9		787.585	6076.11		787.585	14298		787.585
789.411	13835.2	0.750077		789.411	12536.8		789.411	7296.88		789.411	12938.3		789.411	10283.7		789.411	13113		789.411	9994.19		789.411	20343.7		789.411	15036.5		789.411	6925.75		789.411	18168.7		789.411	16218.7		789.411	10121.8		789.411	12884.1		789.411	6101.78		789.411	14306.2		789.411
791.237	13889.8	0.753038		791.237	12587.6		791.237	7295.19		791.237	12939.5		791.237	10252.2		791.237	13111.2		791.237	9994.09		791.237	20396.1		791.237	15076.2		791.237	6912.64		791.237	18161		791.237	16268		791.237	10137.6		791.237	12900.9		791.237	6118.32		791.237	14327.1		791.237
793.064	13914.6	0.754383		793.064	12668.2		793.064	7281.45		793.064	12991		793.064	10317.8		793.064	13152.3		793.064	10023.6		793.064	20437.3		793.064	15094.9		793.064	6952.35		793.064	18236.5		793.064	16344.4		793.064	10218.8		793.064	12920		793.064	6171.75		793.064	14333.1		793.064
794.888	13934.5	0.755463		794.888	12649.2		794.888	7277.54		794.888	12979.9		794.888	10355.4		794.888	13142.9		794.888	10031.6		794.888	20470.6		794.888	15158.9		794.888	6992.96		794.888	18298		794.888	16375.4		794.888	10190.2		794.888	12920.6		794.888	6143.1		794.888	14343.6		794.888
796.714	13943.1	0.755929		796.714	12652.6		796.714	7328.69		796.714	13014.8		796.714	10402.8		796.714	13176.1		796.714	10052.9		796.714	20466.1		796.714	15102.8		796.714	6997.73		796.714	18337.5		796.714	16333.6		796.714	10239.9		796.714	12913		796.714	6123.08		796.714	14367.7		796.714
798.539	14001	0.759069		798.539	12699.4		798.539	7351.44		798.539	13048.1		798.539	10337.2		798.539	13235.1		798.539	10071.6		798.539	20553.7		798.539	15152.9		798.539	6980.94		798.539	18377.5		798.539	16377.7		798.539	10249.2		798.539	12948.9		798.539	6186.66		798.539	14445.2		798.539
800.362	14054.2	0.761954		800.362	12759.8		800.362	7354.39		800.362	13122.6		800.362	10413.9		800.362	13259.3		800.362	10063.2		800.362	20575.5		800.362	15225.5		800.362	7020.33		800.362	18465		800.362	16487.1		800.362	10236.1		800.362	13025.3		800.362	6142.05		800.362	14476.8		800.362
802.187	14040.1	0.761186		802.187	12741.2		802.187	7387.49		802.187	13085.7		802.187	10401.4		802.187	13278.6		802.187	10105.2		802.187	20629.5		802.187	15211.6		802.187	7035.03		802.187	18441.7		802.187	16546.7		802.187	10269.1		802.187	13020.2		802.187	6203.25		802.187	14486.5		802.187
804.011	14119.6	0.765499		804.011	12841.7		804.011	7400.77		804.011	13149.3		804.011	10494.3		804.011	13282		804.011	10146.4		804.011	20701.3		804.011	15323.9		804.011	7048.3		804.011	18485.4		804.011	16539.2		804.011	10316.5		804.011	13085.6		804.011	6213.8		804.011	14513.5		804.011
805.833	14124.3	0.765751		805.833	12804.6		805.833	7404.6		805.833	13172.7		805.833	10488.2		805.833	13345.6		805.833	10153.2		805.833	20689.5		805.833	15394.6		805.833	7046.77		805.833	18532.5		805.833	16619.7		805.833	10318.3		805.833	13130		805.833	6196.24		805.833	14569.1		805.833
807.656	14182.4	0.768901		807.656	12828.9		807.656	7415.68		807.656	13181.5		807.656	10557.7		807.656	13426.3		807.656	10233		807.656	20790.7		807.656	15390.3		807.656	7081.23		807.656	18567.3		807.656	16652		807.656	10356.8		807.656	13210.8		807.656	6258.56		807.656	14605		807.656
809.48	14171.7	0.768321		809.48	12804.8		809.48	7427.99		809.48	13221.8		809.48	10474.5		809.48	13396		809.48	10225.5		809.48	20775.9		809.48	15353.5		809.48	7106.3		809.48	18579.5		809.48	16623.7		809.48	10371.7		809.48	13126.6		809.48	6229.32		809.48	14608.3		809.48
811.3	14236.5	0.771835		811.3	12827.7		811.3	7451.37		811.3	13261.1		811.3	10526.1		811.3	13389.3		811.3	10194.4		811.3	20763.5		811.3	15399.1		811.3	7107.22		811.3	18619.5		811.3	16700.3		811.3	10385.7		811.3	13168.1		811.3	6236.36		811.3	14650.3		811.3
813.123	14246.4	0.77237		813.123	12939.8		813.123	7447.19		813.123	13290.1		813.123	10603.9		813.123	13445.4		813.123	10234.9		813.123	20875.4		813.123	15412		813.123	7119.73		813.123	18689.9		813.123	16741.2		813.123	10384.6		813.123	13226.7		813.123	6264.13		813.123	14667.8		813.123
814.945	14280.3	0.774208		814.945	12869.2		814.945	7451.46		814.945	13305.4		814.945	10602.2		814.945	13485.8		814.945	10302.6		814.945	20889.3		814.945	15481.3		814.945	7119.44		814.945	18741.4		814.945	16741.7		814.945	10409.2		814.945	13249.5		814.945	6253.21		814.945	14712.2		814.945
816.765	14306.5	0.775633		816.765	12898.3		816.765	7502.79		816.765	13333.3		816.765	10632.2		816.765	13467.9		816.765	10274.3		816.765	20959.5		816.765	15517.5		816.765	7145.95		816.765	18827.9		816.765	16843.8		816.765	10460.2		816.765	13239.6		816.765	6294.6		816.765	14773.2		816.765
818.586	14318.9	0.776303		818.586	12937.1		818.586	7517.43		818.586	13373.9		818.586	10632.9		818.586	13545.3		818.586	10316.6		818.586	21013.1		818.586	15501.6		818.586	7183.45		818.586	18808.5		818.586	16882.6		818.586	10476.6		818.586	13286.4		818.586	6327.63		818.586	14794.8		818.586
820.405	14384.5	0.779859		820.405	13060.2		820.405	7536.75		820.405	13397		820.405	10686.5		820.405	13600.6		820.405	10394.6		820.405	21089.1		820.405	15621.4		820.405	7206.18		820.405	18851.3		820.405	16964.3		820.405	10530.9		820.405	13364.1		820.405	6339.53		820.405	14860.2		820.405
822.226	14407.4	0.781101		822.226	13097.6		822.226	7551.74		822.226	13434.8		822.226	10686.8		822.226	13605.8		822.226	10403.4		822.226	21122.1		822.226	15681.6		822.226	7218.16		822.226	18940.6		822.226	16967.4		822.226	10568.3		822.226	13413.4		822.226	6359.54		822.226	14835.5		822.226
824.044	14416.4	0.781587		824.044	13095.5		824.044	7586.15		824.044	13474.6		824.044	10726.3		824.044	13618.8		824.044	10374.8		824.044	21173.3		824.044	15642.4		824.044	7199.52		824.044	18923.1		824.044	17016.8		824.044	10566.8		824.044	13438.3		824.044	6362.09		824.044	14868		824.044
825.865	14468.2	0.784399		825.865	13130.8		825.865	7551.23		825.865	13490.4		825.865	10747.7		825.865	13652.3		825.865	10397.9		825.865	21153.2		825.865	15681.6		825.865	7248.63		825.865	18987.3		825.865	16991.2		825.865	10575.9		825.865	13425.2		825.865	6356.96		825.865	14929.4		825.865
827.684	14500.1	0.786126		827.684	13156.1		827.684	7617.28		827.684	13511.1		827.684	10793.8		827.684	13723.3		827.684	10415.7		827.684	21215.9		827.684	15767.8		827.684	7228.05		827.684	18994.4		827.684	17055.8		827.684	10577.8		827.684	13449.2		827.684	6365.41		827.684	14930		827.684
829.501	14538.2	0.78819		829.501	13175.7		829.501	7602.89		829.501	13569.1		829.501	10775		829.501	13703.6		829.501	10455		829.501	21206.5		829.501	15784.2		829.501	7256.87		829.501	19073.6		829.501	17069.1		829.501	10613		829.501	13526.3		829.501	6382.83		829.501	14990.4		829.501
831.32	14511.6	0.78675		831.32	13168.6		831.32	7623.98		831.32	13600.2		831.32	10814.9		831.32	13731.6		831.32	10483.9		831.32	21290.2		831.32	15821.9		831.32	7263.01		831.32	19137.1		831.32	17061		831.32	10608.6		831.32	13467.7		831.32	6400.39		831.32	15009.3		831.32
833.137	14639.9	0.793705		833.137	13242.6		833.137	7626.84		833.137	13646.3		833.137	10857.3		833.137	13771.5		833.137	10529.2		833.137	21354.8		833.137	15898.3		833.137	7279.28		833.137	19198.1		833.137	17190.8		833.137	10683.6		833.137	13544.5		833.137	6428.34		833.137	15046.6		833.137
834.955	14696.6	0.79678		834.955	13227.1		834.955	7682.43		834.955	13653.9		834.955	10827.7		834.955	13776.1		834.955	10532.8		834.955	21434		834.955	15925.2		834.955	7325.38		834.955	19168.9		834.955	17245.4		834.955	10660.9		834.955	13528.1		834.955	6454.39		834.955	15083		834.955
836.771	14655.8	0.794566		836.771	13323.4		836.771	7694.74		836.771	13703.6		836.771	10913.8		836.771	13826.6		836.771	10560.3		836.771	21508.9		836.771	15933		836.771	7340.84		836.771	19290.8		836.771	17262.9		836.771	10707.6		836.771	13622.9		836.771	6462.41		836.771	15147.2		836.771
838.589	14706.4	0.79731		838.589	13316.7		838.589	7697.56		838.589	13739.5		838.589	10917.7		838.589	13845.2		838.589	10580.4		838.589	21422.1		838.589	16003.3		838.589	7337.05		838.589	19289.7		838.589	17290.4		838.589	10728.8		838.589	13694.1		838.589	6485.82		838.589	15162.6		838.589
840.404	14682.4	0.796013		840.404	13313.9		840.404	7683.96		840.404	13747.9		840.404	10954.3		840.404	13881.6		840.404	10615.8		840.404	21512.2		840.404	15939.2		840.404	7358.8		840.404	19249.2		840.404	17310.1		840.404	10741.7		840.404	13627.5		840.404	6469.71		840.404	15158.8		840.404
842.221	14761.4	0.800291		842.221	13421		842.221	7713.18		842.221	13702.2		842.221	10938		842.221	13857.9		842.221	10621.6		842.221	21531.2		842.221	15974.8		842.221	7337.43		842.221	19313.4		842.221	17335.8		842.221	10748.3		842.221	13692.5		842.221	6494.41		842.221	15197.5		842.221
844.035	14782.8	0.801453		844.035	13384.4		844.035	7744.19		844.035	13757.4		844.035	10980.7		844.035	13913.2		844.035	10623.4		844.035	21594.1		844.035	16005.4		844.035	7374.87		844.035	19417		844.035	17412.2		844.035	10775.3		844.035	13662		844.035	6497.65		844.035	15243.3		844.035
845.851	14736.9	0.798964		845.851	13401.5		845.851	7748.63		845.851	13787.4		845.851	10969.2		845.851	13943.2		845.851	10610.9		845.851	21614		845.851	16014.2		845.851	7427.13		845.851	19421		845.851	17386.7		845.851	10808.2		845.851	13705.7		845.851	6497.84		845.851	15234.8		845.851
847.665	14833.1	0.804179		847.665	13485.6		847.665	7742.47		847.665	13810.3		847.665	10967.7		847.665	13960.5		847.665	10666.4		847.665	21675.1		847.665	16064.6		847.665	7408.68		847.665	19423.2		847.665	17469.8		847.665	10826.5		847.665	13722.4		847.665	6533.62		847.665	15248.2		847.665
849.48	14791.4	0.80192		849.48	13427.4		849.48	7757.43		849.48	13748.8		849.48	10961.8		849.48	13985.1		849.48	10651.6		849.48	21661		849.48	16100.5		849.48	7451.05		849.48	19507.6		849.48	17517.2		849.48	10829.8		849.48	13782.7		849.48	6515.77		849.48	15306.1		849.48
851.293	14904.2	0.808035		851.293	13445.6		851.293	7777.78		851.293	13850.9		851.293	11069.6		851.293	14078.4		851.293	10735.2		851.293	21730		851.293	16177.3		851.293	7450.77		851.293	19534		851.293	17509		851.293	10837.2		851.293	13845.3		851.293	6544.79		851.293	15355		851.293
853.108	14919.8	0.808881		853.108	13520.2		853.108	7820.38		853.108	13888.2		853.108	11057.7		853.108	14019.6		853.108	10718.7		853.108	21819.4		853.108	16254.9		853.108	7470.07		853.108	19536.5		853.108	17627.5		853.108	10895.5		853.108	13845.3		853.108	6522.25		853.108	15399		853.108
854.92	14961.2	0.811127		854.92	13501.6		854.92	7796.45		854.92	13904		854.92	11078.5		854.92	14073.2		854.92	10733.6		854.92	21800.9		854.92	16224.2		854.92	7480.08		854.92	19559		854.92	17588.8		854.92	10926.4		854.92	13843.3		854.92	6568.92		854.92	15418.4		854.92
856.734	14931.1	0.809496		856.734	13595.4		856.734	7831.53		856.734	13903.8		856.734	11080.7		856.734	14087.4		856.734	10730.1		856.734	21818.9		856.734	16186.9		856.734	7482.1		856.734	19604.7		856.734	17616		856.734	10847.9		856.734	13857.2		856.734	6540.74		856.734	15422.3		856.734
858.546	14951.2	0.810583		858.546	13539		858.546	7813.64		858.546	13944.3		858.546	11044.9		858.546	14092		858.546	10736.9		858.546	21873.4		858.546	16236		858.546	7483.86		858.546	19679.1		858.546	17606.8		858.546	10863.3		858.546	13862.2		858.546	6567.59		858.546	15414		858.546
860.359	14974.9	0.81187		860.359	13559.6		860.359	7816.69		860.359	13968		860.359	11098.9		860.359	14119.6		860.359	10735.7		860.359	21814.7		860.359	16314.9		860.359	7493.07		860.359	19655.3		860.359	17659.9		860.359	10957		860.359	13925.4		860.359	6557.46		860.359	15412.7		860.359
862.17	15010.6	0.813807		862.17	13570.7		862.17	7791.9		862.17	13990.8		862.17	11119.8		862.17	14134.1		862.17	10800.7		862.17	21943.8		862.17	16267.4		862.17	7504.33		862.17	19651.1		862.17	17716		862.17	10895		862.17	13928.7		862.17	6616.59		862.17	15485.5		862.17
863.98	15002.9	0.813387		863.98	13568.1		863.98	7855.94		863.98	13991.4		863.98	11138.6		863.98	14134		863.98	10804.3		863.98	21913.7		863.98	16259.1		863.98	7521.97		863.98	19712.3		863.98	17759.8		863.98	10968.4		863.98	13967.4		863.98	6573.31		863.98	15445.2		863.98
865.793	15058.1	0.816379		865.793	13628.1		865.793	7873.3		865.793	14027.9		865.793	11114.7		865.793	14151.1		865.793	10837.7		865.793	21980.5		865.793	16334.6		865.793	7526.65		865.793	19692.1		865.793	17764.3		865.793	10960.6		865.793	14004.3		865.793	6594.55		865.793	15569.5		865.793
867.603	15020.9	0.814365		867.603	13648.7		867.603	7885.72		867.603	14072.4		867.603	11205.9		867.603	14165.1		867.603	10815.7		867.603	21989.2		867.603	16366.9		867.603	7541.53		867.603	19714.4		867.603	17746.6		867.603	10965.1		867.603	13954.2		867.603	6645.58		867.603	15555.2		867.603
869.414	15073.2	0.817197		869.414	13708.1		869.414	7861.06		869.414	14048		869.414	11176.2		869.414	14221.3		869.414	10833.2		869.414	21978.8		869.414	16367.1		869.414	7549.05		869.414	19752.3		869.414	17789.2		869.414	10981.4		869.414	14042.6		869.414	6616.74		869.414	15538.7		869.414
871.223	15067.2	0.816874		871.223	13718.5		871.223	7871.73		871.223	14083.9		871.223	11234.8		871.223	14232		871.223	10905.2		871.223	22074		871.223	16471.3		871.223	7560.97		871.223	19850.4		871.223	17817.4		871.223	11037		871.223	14056.5		871.223	6651.08		871.223	15591.7		871.223
873.034	15152	0.821468		873.034	13762.6		873.034	7939.64		873.034	14106.4		873.034	11172.5		873.034	14218		873.034	10944.7		873.034	22147.8		873.034	16464.7		873.034	7581.05		873.034	19924.3		873.034	17885.5		873.034	11110.9		873.034	14042.7		873.034	6634.04		873.034	15635.7		873.034
874.842	15194.8	0.823793		874.842	13675.1		874.842	7929.06		874.842	14158.5		874.842	11282.1		874.842	14321.5		874.842	10904.2		874.842	22107.2		874.842	16492.3		874.842	7603.07		874.842	19836.7		874.842	17934.9		874.842	11058.4		874.842	14094.6		874.842	6691.96		874.842	15607.4		874.842
876.65	15176.4	0.822794		876.65	13716.8		876.65	7909.42		876.65	14148		876.65	11295.6		876.65	14209.8		876.65	10858.5		876.65	22179.2		876.65	16454.2		876.65	7594.56		876.65	19909.2		876.65	17919.1		876.65	11059.8		876.65	14079		876.65	6655.61		876.65	15618.5		876.65
878.46	15107.2	0.819044		878.46	13785.6		878.46	7948.95		878.46	14153.8		878.46	11278.4		878.46	14317.9		878.46	10916.7		878.46	22195.1		878.46	16523.1		878.46	7591.03		878.46	19962.1		878.46	17961.8		878.46	11084.2		878.46	14104.2		878.46	6676.19		878.46	15622.4		878.46
880.268	15160.2	0.821915		880.268	13782.9		880.268	7941.92		880.268	14194.2		880.268	11315.8		880.268	14338		880.268	10916.5		880.268	22186.4		880.268	16510.3		880.268	7637.05		880.268	19937		880.268	17980.7		880.268	11087.5		880.268	14086.8		880.268	6665.26		880.268	15712.5		880.268
882.075	15226.3	0.825498		882.075	13789.6		882.075	7998.19		882.075	14190.2		882.075	11322		882.075	14328.9		882.075	10989		882.075	22162.7		882.075	16562.2		882.075	7615.79		882.075	19962.8		882.075	17982.6		882.075	11110.3		882.075	14176.1		882.075	6684.14		882.075	15701.3		882.075
883.883	15184.6	0.82324		883.883	13868.1		883.883	7958.92		883.883	14224		883.883	11288.8		883.883	14380.4		883.883	10963.2		883.883	22242.1		883.883	16595.1		883.883	7669.92		883.883	19986.4		883.883	18061.3		883.883	11097.3		883.883	14153.9		883.883	6681.98		883.883	15711.5		883.883
885.69	15215.1	0.824891		885.69	13876.8		885.69	7979.48		885.69	14240		885.69	11313		885.69	14356.9		885.69	10935.1		885.69	22314.4		885.69	16552.1		885.69	7653.91		885.69	19998.2		885.69	17977.8		885.69	11100.6		885.69	14185.1		885.69	6701.9		885.69	15724.1		885.69
887.495	15306	0.829822		887.495	13875.6		887.495	7970.91		887.495	14246.2		887.495	11402		887.495	14426.9		887.495	10996.8		887.495	22359.9		887.495	16604.1		887.495	7665.59		887.495	20099.6		887.495	18142.3		887.495	11197.3		887.495	14152.6		887.495	6732.18		887.495	15784.4		887.495
889.303	15305.6	0.829798		889.303	13885.8		889.303	7987		889.303	14317		889.303	11344.2		889.303	14375.6		889.303	11028.1		889.303	22364.5		889.303	16682.1		889.303	7691.77		889.303	20083.6		889.303	18167.6		889.303	11176.5		889.303	14234.3		889.303	6723.07		889.303	15806.4		889.303
891.108	15330.9	0.831169		891.108	13915.4		891.108	8018.53		891.108	14338.8		891.108	11414.8		891.108	14481.9		891.108	11057.9		891.108	22387		891.108	16661.1		891.108	7720.41		891.108	20187.8		891.108	18161.8		891.108	11230.2		891.108	14202.8		891.108	6774.1		891.108	15874.2		891.108
892.913	15329.7	0.831102		892.913	13906		892.913	8038.37		892.913	14324.9		892.913	11414.6		892.913	14493		892.913	11006.6		892.913	22373.6		892.913	16698.2		892.913	7717.83		892.913	20175.2		892.913	18198.7		892.913	11215.4		892.913	14234.8		892.913	6761.8		892.913	15852.8		892.913
894.72	15325.2	0.830858		894.72	13984.9		894.72	8073.95		894.72	14345.9		894.72	11421.3		894.72	14465.6		894.72	11052.8		894.72	22462.3		894.72	16746.4		894.72	7721.82		894.72	20220.4		894.72	18169		894.72	11223		894.72	14322.8		894.72	6783.32		894.72	15918.3		894.72
896.524	15413.4	0.835643		896.524	13960.1		896.524	8051.37		896.524	14390.9		896.524	11455.9		896.524	14451		896.524	11056		896.524	22451.5		896.524	16759.6		896.524	7721.64		896.524	20220.1		896.524	18239.6		896.524	11206.8		896.524	14326.1		896.524	6767.13		896.524	15889		896.524
898.328	15383.8	0.834039		898.328	13978.3		898.328	8078.72		898.328	14402.4		898.328	11448.9		898.328	14503.2		898.328	11108		898.328	22458.6		898.328	16741.4		898.328	7748.92		898.328	20237		898.328	18250.8		898.328	11267.1		898.328	14310.7		898.328	6774.13		898.328	15939.4		898.328
900.131	15399.9	0.834912		900.131	13983.6		900.131	8044.37		900.131	14367.7		900.131	11518.2		900.131	14529.5		900.131	11128.1		900.131	22513.2		900.131	16832.3		900.131	7731.53		900.131	20301.3		900.131	18254.7		900.131	11264.9		900.131	14322.2		900.131	6790.84		900.131	15919.9		900.131
901.936	15416.9	0.835831		901.936	14018.3		901.936	8077.4		901.936	14402.8		901.936	11488		901.936	14532.9		901.936	11131.8		901.936	22590.8		901.936	16765.8		901.936	7763.44		901.936	20332.9		901.936	18249.1		901.936	11311.6		901.936	14364.9		901.936	6802.16		901.936	15957.4		901.936
903.739	15486.9	0.839627		903.739	14066.9		903.739	8110.63		903.739	14449.3		903.739	11516.7		903.739	14589.7		903.739	11146.5		903.739	22578.4		903.739	16808.7		903.739	7768.33		903.739	20385.7		903.739	18358.7		903.739	11277.7		903.739	14432.1		903.739	6820.69		903.739	15988.8		903.739
905.542	15472.3	0.838835		905.542	14016.9		905.542	8128.46		905.542	14466.5		905.542	11470		905.542	14570.2		905.542	11174.1		905.542	22605		905.542	16870.8		905.542	7768.71		905.542	20347.8		905.542	18373.6		905.542	11331.5		905.542	14341.1		905.542	6835.66		905.542	15989.7		905.542
907.346	15516.9	0.841253		907.346	14060.9		907.346	8147.26		907.346	14538.6		907.346	11494.1		907.346	14618.5		907.346	11188.2		907.346	22674.9		907.346	16886.8		907.346	7831.09		907.346	20448.8		907.346	18393.1		907.346	11362.6		907.346	14451.4		907.346	6830.34		907.346	15994.5		907.346
909.147	15540.6	0.842538		909.147	14078.1		909.147	8153.92		909.147	14460		909.147	11576.3		909.147	14583.1		909.147	11221.5		909.147	22704.7		909.147	16977		909.147	7803.31		909.147	20394.1		909.147	18395.9		909.147	11370.5		909.147	14435.8		909.147	6839.46		909.147	16035.2		909.147
910.949	15639.4	0.847895		910.949	14182.6		910.949	8171.36		910.949	14542.2		910.949	11567.8		910.949	14671.9		910.949	11225.2		910.949	22750.4		910.949	17007.3		910.949	7851.51		910.949	20475.3		910.949	18453.9		910.949	11401.6		910.949	14525.3		910.949	6864.82		910.949	16105.6		910.949
912.75	15630.2	0.847397		912.75	14193.3		912.75	8191.91		912.75	14553.4		912.75	11644.8		912.75	14703.4		912.75	11269.8		912.75	22784.8		912.75	16966.5		912.75	7862.44		912.75	20545.4		912.75	18517.3		912.75	11459.1		912.75	14570.2		912.75	6882.02		912.75	16092.2		912.75
914.55	15606.9	0.846135		914.55	14169.6		914.55	8182.56		914.55	14538		914.55	11592		914.55	14685.5		914.55	11238		914.55	22794.2		914.55	17029.8		914.55	7838.28		914.55	20563.1		914.55	18521.4		914.55	11405.3		914.55	14470.4		914.55	6897.66		914.55	16114.6		914.55
916.353	15629.5	0.84736		916.353	14150.2		916.353	8150.8		916.353	14585.2		916.353	11635.5		916.353	14692.7		916.353	11228.8		916.353	22805.8		916.353	17013.2		916.353	7828.47		916.353	20526		916.353	18551		916.353	11394.6		916.353	14484.5		916.353	6886.83		916.353	16165		916.353
918.153	15670.1	0.849559		918.153	14219.9		918.153	8192.57		918.153	14607.7		918.153	11666.6		918.153	14753.3		918.153	11276.8		918.153	22794.3		918.153	17071.5		918.153	7882.78		918.153	20628.9		918.153	18570.3		918.153	11434.7		918.153	14532.3		918.153	6894.85		918.153	16184.6		918.153
919.952	15678.4	0.850009		919.952	14293.6		919.952	8213.11		919.952	14670.6		919.952	11670		919.952	14771.4		919.952	11284.5		919.952	22889.3		919.952	17029.8		919.952	7867.92		919.952	20627.8		919.952	18659.7		919.952	11475		919.952	14572.5		919.952	6891.03		919.952	16205.1		919.952
921.752	15738.6	0.85327		921.752	14263.9		921.752	8202.42		921.752	14663.3		921.752	11650.7		921.752	14777.4		921.752	11284.6		921.752	22892.6		921.752	17100.1		921.752	7901.74		921.752	20632.8		921.752	18644.1		921.752	11452.7		921.752	14569.6		921.752	6904.04		921.752	16221.6		921.752
923.551	15706.1	0.851508		923.551	14284.7		923.551	8217.6		923.551	14672.1		923.551	11703		923.551	14805.6		923.551	11318.8		923.551	22909.8		923.551	17128.8		923.551	7895.15		923.551	20697.7		923.551	18678.1		923.551	11490		923.551	14599.7		923.551	6911.45		923.551	16233.5		923.551
925.351	15752	0.853999		925.351	14266.2		925.351	8231.4		925.351	14783.1		925.351	11698.3		925.351	14822.3		925.351	11333.1		925.351	22981.9		925.351	17174.3		925.351	7888.34		925.351	20744.6		925.351	18745.5		925.351	11512.5		925.351	14622.2		925.351	6923.76		925.351	16287.9		925.351
927.149	15697.7	0.851057		927.149	14317		927.149	8236.62		927.149	14668.2		927.149	11692.2		927.149	14767.3		927.149	11320		927.149	22970.2		927.149	17135.2		927.149	7905.51		927.149	20716.8		927.149	18674.6		927.149	11496.7		927.149	14683.3		927.149	6926.15		927.149	16267.5		927.149
928.947	15756.1	0.85422		928.947	14290.1		928.947	8270.37		928.947	14713		928.947	11735.7		928.947	14845		928.947	11346.7		928.947	22935.9		928.947	17187.7		928.947	7932.29		928.947	20750.8		928.947	18695.8		928.947	11494.4		928.947	14683.8		928.947	6950.98		928.947	16235.5		928.947
930.745	15823.2	0.857858		930.745	14339.8		930.745	8270.24		930.745	14768.6		930.745	11777.8		930.745	14888.1		930.745	11352.1		930.745	23050		930.745	17211.8		930.745	7917.35		930.745	20788.9		930.745	18834.3		930.745	11551.4		930.745	14696.7		930.745	6946.92		930.745	16332.1		930.745
932.542	15781.3	0.85559		932.542	14318.9		932.542	8270.08		932.542	14792.9		932.542	11806		932.542	14905.8		932.542	11417.1		932.542	23093.8		932.542	17312.3		932.542	7983.94		932.542	20866.1		932.542	18806.8		932.542	11560.9		932.542	14687.3		932.542	6959.4		932.542	16394.5		932.542
934.339	15860.1	0.859859		934.339	14371.3		934.339	8313.27		934.339	14781.9		934.339	11740.5		934.339	14886.6		934.339	11405.4		934.339	23076.3		934.339	17238.8		934.339	7980.88		934.339	20811.5		934.339	18817		934.339	11549.7		934.339	14747.8		934.339	6971.28		934.339	16319.4		934.339
936.137	15830.4	0.85825		936.137	14422.2		936.137	8306.75		936.137	14804.1		936.137	11740.5		936.137	14877.8		936.137	11411.6		936.137	23049.9		936.137	17238.4		936.137	7965.69		936.137	20795		936.137	18748.3		936.137	11567		936.137	14733.9		936.137	6972.49		936.137	16344.1		936.137
937.933	15880.3	0.860957		937.933	14422.1		937.933	8325.94		937.933	14785.2		937.933	11790.6		937.933	14920.6		937.933	11402.7		937.933	23136.6		937.933	17289.4		937.933	7978.26		937.933	20883.3		937.933	18823.8		937.933	11593.2		937.933	14732.7		937.933	7002.87		937.933	16403.1		937.933
939.729	15817.1	0.85753		939.729	14408.2		939.729	8305.34		939.729	14827.3		939.729	11839.9		939.729	14930.8		939.729	11419.4		939.729	23113.3		939.729	17338.6		939.729	7977.92		939.729	20936.3		939.729	18874.7		939.729	11586.2		939.729	14796.6		939.729	6982.01		939.729	16415.3		939.729
941.525	15858.3	0.859762		941.525	14428.4		941.525	8304.8		941.525	14834		941.525	11798		941.525	14898.9		941.525	11395.4		941.525	23160.9		941.525	17325.8		941.525	7952.68		941.525	20906.2		941.525	18875.9		941.525	11610		941.525	14740.7		941.525	6999.83		941.525	16386.1		941.525
943.32	15973.5	0.866006		943.32	14484.7		943.32	8332.05		943.32	14874.1		943.32	11816.9		943.32	15000.6		943.32	11440.6		943.32	23194		943.32	17374.9		943.32	8019.62		943.32	20969.6		943.32	18919.9		943.32	11622.1		943.32	14824		943.32	6999.25		943.32	16441.2		943.32
945.114	15895	0.861752		945.114	14486		945.114	8284.04		945.114	14859.1		945.114	11873.7		945.114	15008.1		945.114	11455.4		945.114	23205.6		945.114	17333.6		945.114	7979.8		945.114	20967.1		945.114	18969.1		945.114	11675.1		945.114	14760.6		945.114	6997.42		945.114	16458.1		945.114
946.909	15930.6	0.863682		946.909	14505.9		946.909	8339.29		946.909	14884.6		946.909	11884.1		946.909	15011.4		946.909	11492.1		946.909	23195.5		946.909	17429.2		946.909	8024.51		946.909	20980.5		946.909	18969.8		946.909	11662.9		946.909	14854		946.909	7010.85		946.909	16494.5		946.909
948.703	15919	0.863054		948.703	14494.7		948.703	8354.36		948.703	14903		948.703	11899		948.703	15017.7		948.703	11517.8		948.703	23249.7		948.703	17447.2		948.703	8047.49		948.703	21016.2		948.703	19009.3		948.703	11631		948.703	14817.8		948.703	7026.01		948.703	16460.8		948.703
950.496	16029.3	0.869031		950.496	14544.4		950.496	8370.88		950.496	14932.1		950.496	11830.6		950.496	15038.4		950.496	11534		950.496	23259.8		950.496	17449.2		950.496	8064.67		950.496	21102.5		950.496	18995.7		950.496	11678.3		950.496	14887.8		950.496	7019.71		950.496	16559		950.496
952.292	15985.2	0.866644		952.292	14532		952.292	8356.44		952.292	15000.1		952.292	11963.6		952.292	15153.7		952.292	11542.9		952.292	23315.2		952.292	17440.5		952.292	8054.07		952.292	21152.4		952.292	19048.6		952.292	11684.2		952.292	14848.8		952.292	7053.07		952.292	16514.2		952.292
954.085	15987.3	0.866754		954.085	14545.3		954.085	8391.87		954.085	15005.6		954.085	11953.1		954.085	15137		954.085	11549.6		954.085	23336.5		954.085	17450.1		954.085	8076.75		954.085	21185		954.085	19111.7		954.085	11719.3		954.085	14955.4		954.085	7050.72		954.085	16649.3		954.085
955.877	16080.9	0.87183		955.877	14602.9		955.877	8389.43		955.877	15010.8		955.877	11974.3		955.877	15134.8		955.877	11564.9		955.877	23361.6		955.877	17558.9		955.877	8087.16		955.877	21125		955.877	19101.6		955.877	11744.9		955.877	14995.9		955.877	7081.13		955.877	16626.9		955.877
957.67	16100.4	0.872889		957.67	14687.5		957.67	8446.83		957.67	15089.9		957.67	12010.1		957.67	15130.5		957.67	11624.3		957.67	23498.8		957.67	17610		957.67	8123.77		957.67	21217.9		957.67	19219.3		957.67	11778.3		957.67	14992.3		957.67	7082.32		957.67	16667.3		957.67
959.462	16146.9	0.875409		959.462	14637.7		959.462	8410.39		959.462	15099.7		959.462	12059.2		959.462	15175.3		959.462	11615.7		959.462	23553.9		959.462	17650.6		959.462	8150.53		959.462	21258.5		959.462	19225.2		959.462	11750.9		959.462	15014		959.462	7120.39		959.462	16739.4		959.462
961.253	16172.4	0.876789		961.253	14647.9		961.253	8482.02		961.253	15103.6		961.253	12037.2		961.253	15159.9		961.253	11619.4		961.253	23539.7		961.253	17707		961.253	8144.04		961.253	21316		961.253	19217.7		961.253	11796.6		961.253	15073.7		961.253	7139.28		961.253	16682.4		961.253
963.044	16226.6	0.87973		963.044	14801.8		963.044	8511.66		963.044	15216.5		963.044	12076.2		963.044	15245		963.044	11630.9		963.044	23584.9		963.044	17655.2		963.044	8181.16		963.044	21354.7		963.044	19308.2		963.044	11848.3		963.044	15080.8		963.044	7165.87		963.044	16813.4		963.044
964.835	16209.3	0.878791		964.835	14804.1		964.835	8489.91		964.835	15153.1		964.835	12114.1		964.835	15238.2		964.835	11705.3		964.835	23611.3		964.835	17756.3		964.835	8182.63		964.835	21394.9		964.835	19303.8		964.835	11863.1		964.835	15043.9		964.835	7143.1		964.835	16791.4		964.835
966.626	16342.1	0.885995		966.626	14762.2		966.626	8510.16		966.626	15213		966.626	12142		966.626	15319.1		966.626	11693.3		966.626	23682.8		966.626	17771.2		966.626	8211.11		966.626	21442.2		966.626	19408.7		966.626	11918.7		966.626	15128.2		966.626	7191.67		966.626	16877.1		966.626
968.416	16324.5	0.885038		968.416	14843		968.416	8532.26		968.416	15213		968.416	12119.9		968.416	15283.2		968.416	11762.4		968.416	23748.8		968.416	17793		968.416	8199.47		968.416	21452.9		968.416	19353.5		968.416	11935.3		968.416	15163.1		968.416	7201.01		968.416	16844.6		968.416
970.206	16283.2	0.882797		970.206	14828.5		970.206	8514.16		970.206	15269.5		970.206	12169.4		970.206	15344.3		970.206	11769.6		970.206	23665.9		970.206	17791.5		970.206	8243.11		970.206	21442.1		970.206	19465.7		970.206	11917.5		970.206	15161.7		970.206	7189.16		970.206	16866.7		970.206
971.995	16378.6	0.887972		971.995	14852.8		971.995	8560.91		971.995	15294.9		971.995	12169.1		971.995	15385.1		971.995	11804.7		971.995	23814.2		971.995	17957.6		971.995	8263.06		971.995	21524.1		971.995	19485.8		971.995	11956.7		971.995	15200.6		971.995	7199.24		971.995	16922		971.995
973.785	16334.7	0.88559		973.785	14776.8		973.785	8550.48		973.785	15284.4		973.785	12187.9		973.785	15386.3		973.785	11773.5		973.785	23755.4		973.785	17819.1		973.785	8217.86		973.785	21504.1		973.785	19451		973.785	11931		973.785	15156.8		973.785	7184.22		973.785	16908.5		973.785
975.573	16399.5	0.889105		975.573	14877.2		975.573	8547.56		975.573	15316.6		975.573	12205.8		975.573	15432.6		975.573	11774.3		975.573	23818.1		975.573	17916		975.573	8256.84		975.573	21542		975.573	19533.7		975.573	11961.4		975.573	15232.8		975.573	7221.16		975.573	16952.3		975.573
977.362	16416.7	0.890035		977.362	14897.2		977.362	8589.31		977.362	15339.7		977.362	12247.3		977.362	15464.5		977.362	11812		977.362	23884.3		977.362	17870.3		977.362	8282.41		977.362	21529.5		977.362	19554.7		977.362	12022.1		977.362	15285.4		977.362	7238.33		977.362	16961.4		977.362
979.15	16499.9	0.894549		979.15	15000.2		979.15	8590.99		979.15	15324.8		979.15	12245.4		979.15	15417.7		979.15	11847.5		979.15	23883.1		979.15	17891.8		979.15	8268.85		979.15	21646		979.15	19634.4		979.15	11982.3		979.15	15303.1		979.15	7254.51		979.15	16972.9		979.15
980.938	16490.9	0.894057		980.938	15007		980.938	8618.28		980.938	15352.6		980.938	12239.1		980.938	15492.1		980.938	11860.7		980.938	23941.2		980.938	18020.8		980.938	8310.73		980.938	21706.1		980.938	19593		980.938	11999.5		980.938	15281.3		980.938	7266.38		980.938	17058.4		980.938
982.725	16519.5	0.89561		982.725	14967.1		982.725	8618.72		982.725	15384.9		982.725	12246.9		982.725	15486		982.725	11879.2		982.725	23956		982.725	18037.1		982.725	8316.1		982.725	21718.6		982.725	19647.7		982.725	12048.4		982.725	15260.1		982.725	7267.44		982.725	17062.8		982.725
984.512	16532.5	0.896315		984.512	15009.6		984.512	8606.94		984.512	15430.1		984.512	12269.3		984.512	15516.7		984.512	11879.3		984.512	23981.3		984.512	17995.9		984.512	8326.36		984.512	21732.1		984.512	19642.3		984.512	12051.6		984.512	15395.9		984.512	7285.35		984.512	17081.2		984.512
986.299	16606.5	0.900329		986.299	15046.9		986.299	8642.05		986.299	15467.6		986.299	12316.8		986.299	15559.9		986.299	11918.9		986.299	24046.4		986.299	18058		986.299	8340.14		986.299	21763.5		986.299	19744		986.299	12068.8		986.299	15388.6		986.299	7298.83		986.299	17086.9		986.299
988.083	16529.8	0.896167		988.083	14999		988.083	8622.13		988.083	15510.9		988.083	12323.4		988.083	15599.4		988.083	11904.3		988.083	24097		988.083	18106.6		988.083	8319.35		988.083	21761.9		988.083	19746.4		988.083	12115.3		988.083	15366.8		988.083	7310.99		988.083	17118.6		988.083
989.869	16561.8	0.897903		989.869	15029.8		989.869	8650.43		989.869	15478.9		989.869	12328.6		989.869	15574.2		989.869	11917.9		989.869	24109.6		989.869	18141		989.869	8345.51		989.869	21804.2		989.869	19710.6		989.869	12079.5		989.869	15415.7		989.869	7347.98		989.869	17144.1		989.869
991.655	16569.1	0.898298		991.655	15099.9		991.655	8704.8		991.655	15521.5		991.655	12302.4		991.655	15604.8		991.655	11960.9		991.655	24154.5		991.655	18134.9		991.655	8364.96		991.655	21858.1		991.655	19758.3		991.655	12099.8		991.655	15429.4		991.655	7361.1		991.655	17199.1		991.655
993.44	16612.1	0.900631		993.44	15125.3		993.44	8708.23		993.44	15559.3		993.44	12373.2		993.44	15605.2		993.44	11978.7		993.44	24145		993.44	18112.4		993.44	8392.19		993.44	21901.9		993.44	19778		993.44	12127.3		993.44	15434.7		993.44	7386.92		993.44	17196.3		993.44
995.225	16633.5	0.90179		995.225	15156.4		995.225	8683.04		995.225	15542.7		995.225	12359		995.225	15631.4		995.225	11987		995.225	24119.7		995.225	18159.1		995.225	8382.91		995.225	21949.6		995.225	19836.9		995.225	12169		995.225	15511		995.225	7419.42		995.225	17220.9		995.225
997.01	16689.3	0.904813		997.01	15141.8		997.01	8724.78		997.01	15602		997.01	12401.2		997.01	15645.1		997.01	11984.5		997.01	24201.9		997.01	18124.5		997.01	8405.93		997.01	21839.9		997.01	19845.8		997.01	12143.6		997.01	15473.4		997.01	7420.35		997.01	17222.5		997.01
998.794	16716.8	0.906309		998.794	15117.2		998.794	8730.7		998.794	15594.4		998.794	12437.6		998.794	15697.3		998.794	12051.5		998.794	24300.2		998.794	18269.6		998.794	8438.39		998.794	22004.2		998.794	19872.7		998.794	12168.4		998.794	15521.3		998.794	7478.8		998.794	17265.2		998.794
1000.58	16679.9	0.904307		1000.58	15245.2		1000.58	8771.59		1000.58	15575.2		1000.58	12463.2		1000.58	15686.1		1000.58	12039.3		1000.58	24322.2		1000.58	18210.8		1000.58	8433.86		1000.58	22040.7		1000.58	19929.5		1000.58	12178.1		1000.58	15542.2		1000.58	7584.28		1000.58	17342.1		1000.58
1002.36	16767.3	0.909046		1002.36	15222.5		1002.36	8777.58		1002.36	15661.8		1002.36	12430.9		1002.36	15718.7		1002.36	12056.9		1002.36	24363.8		1002.36	18299.4		1002.36	8475.36		1002.36	22073.4		1002.36	19957.1		1002.36	12203.1		1002.36	15583.3		1002.36	7724.34		1002.36	17307.1		1002.36
1004.14	16798	0.910709		1004.14	15226		1004.14	8799.68		1004.14	15684.6		1004.14	12491.2		1004.14	15748		1004.14	12044.6		1004.14	24431.9		1004.14	18336.2		1004.14	8459.88		1004.14	22075.6		1004.14	19939		1004.14	12246.6		1004.14	15580.7		1004.14	8068.11		1004.14	17332.5		1004.14
1005.93	16817.4	0.911762		1005.93	15316.5		1005.93	8832.21		1005.93	15707.3		1005.93	12555.5		1005.93	15827.2		1005.93	12129.5		1005.93	24435.2		1005.93	18387.2		1005.93	8505.9		1005.93	22125.4		1005.93	20049.6		1005.93	12267.6		1005.93	15675.1		1005.93	8458.95		1005.93	17387.3		1005.93
1007.71	16778.9	0.909674		1007.71	15299.2		1007.71	8834.75		1007.71	15718.2		1007.71	12556		1007.71	15851.9		1007.71	12094.8		1007.71	24437		1007.71	18382.2		1007.71	8512.63		1007.71	22142.2		1007.71	20026.1		1007.71	12276.4		1007.71	15670.5		1007.71	8691.03		1007.71	17424.7		1007.71
1009.49	16806.4	0.911166		1009.49	15290		1009.49	8859.2		1009.49	15773.7		1009.49	12524.4		1009.49	15818.8		1009.49	12107.6		1009.49	24553.5		1009.49	18410.5		1009.49	8512.2		1009.49	22146.3		1009.49	20070.4		1009.49	12263.2		1009.49	15658.4		1009.49	8671.2		1009.49	17407.2		1009.49
1011.27	16904.8	0.9165		1011.27	15274.8		1011.27	8818.63		1011.27	15750.1		1011.27	12576.7		1011.27	15829.1		1011.27	12166.3		1011.27	24456.1		1011.27	18393.1		1011.27	8546.48		1011.27	22145.5		1011.27	20127.4		1011.27	12291		1011.27	15703.6		1011.27	8367.92		1011.27	17419		1011.27
1013.05	16935.1	0.918139		1013.05	15378.6		1013.05	8864.23		1013.05	15785.5		1013.05	12570.3		1013.05	15914.5		1013.05	12193.6		1013.05	24585.4		1013.05	18473.8		1013.05	8543.94		1013.05	22292.2		1013.05	20157.6		1013.05	12348.3		1013.05	15749.4		1013.05	7975.11		1013.05	17483.5		1013.05
1014.83	16940.3	0.918424		1014.83	15372		1014.83	8882.67		1014.83	15824.1		1014.83	12572.9		1014.83	15843.1		1014.83	12187.7		1014.83	24615.3		1014.83	18456.8		1014.83	8575.57		1014.83	22280.4		1014.83	20153.7		1014.83	12358.2		1014.83	15733.7		1014.83	7730.47		1014.83	17517.7		1014.83
1016.61	17003	0.921823		1016.61	15403.5		1016.61	8865.27		1016.61	15821.5		1016.61	12618.8		1016.61	15909.9		1016.61	12180.3		1016.61	24651.3		1016.61	18463.8		1016.61	8557.06		1016.61	22358.8		1016.61	20226.3		1016.61	12390.9		1016.61	15699.5		1016.61	7653.99		1016.61	17579		1016.61
1018.39	16991.9	0.921219		1018.39	15441.9		1018.39	8896.68		1018.39	15920.3		1018.39	12602.9		1018.39	15939.3		1018.39	12224.6		1018.39	24695.4		1018.39	18561.4		1018.39	8581.02		1018.39	22368.8		1018.39	20269.6		1018.39	12407.1		1018.39	15803.3		1018.39	7584.82		1018.39	17621.3		1018.39
1020.17	17020.8	0.92279		1020.17	15414.8		1020.17	8877.03		1020.17	15856.6		1020.17	12643.6		1020.17	15902.4		1020.17	12242.7		1020.17	24647.6		1020.17	18518.1		1020.17	8588.36		1020.17	22434.6		1020.17	20311.7		1020.17	12442.2		1020.17	15779.8		1020.17	7546.84		1020.17	17510.3		1020.17
1021.95	17011.6	0.922291		1021.95	15394.3		1021.95	8899.78		1021.95	15886.7		1021.95	12658.8		1021.95	15957.2		1021.95	12268.2		1021.95	24747		1021.95	18578.7		1021.95	8579.61		1021.95	22359.8		1021.95	20215		1021.95	12427.2		1021.95	15852.4		1021.95	7560.7		1021.95	17565.4		1021.95
1023.73	17065.4	0.925205		1023.73	15505.7		1023.73	8921.26		1023.73	15951.2		1023.73	12655.7		1023.73	16037.5		1023.73	12248.9		1023.73	24734.1		1023.73	18668.5		1023.73	8609.23		1023.73	22480.9		1023.73	20299.6		1023.73	12448.9		1023.73	15848.2		1023.73	7554.14		1023.73	17632.8		1023.73
1025.51	17138.3	0.929158		1025.51	15526.3		1025.51	8951.09		1025.51	15972.6		1025.51	12668.7		1025.51	16051		1025.51	12270.6		1025.51	24797		1025.51	18583.8		1025.51	8616.81		1025.51	22550.5		1025.51	20358.8		1025.51	12482.4		1025.51	15904.3		1025.51	7541.4		1025.51	17685.4		1025.51
1027.29	17181.2	0.931483		1027.29	15550		1027.29	8989.72		1027.29	16004.1		1027.29	12749.2		1027.29	16104.3		1027.29	12351.6		1027.29	24877.2		1027.29	18714.6		1027.29	8666.23		1027.29	22521.8		1027.29	20367.9		1027.29	12501		1027.29	15897.9		1027.29	7593.65		1027.29	17786		1027.29
1029.07	17093.6	0.926733		1029.07	15613.1		1029.07	8962.03		1029.07	16001.1		1029.07	12752.3		1029.07	16122.8		1029.07	12341.6		1029.07	24884.6		1029.07	18687.2		1029.07	8627.92		1029.07	22559.8		1029.07	20370.2		1029.07	12509.3		1029.07	15928.8		1029.07	7580.55		1029.07	17719.1		1029.07
1030.84	17071.1	0.925517		1030.84	15631		1030.84	8954.06		1030.84	16020.9		1030.84	12785.1		1030.84	16068.2		1030.84	12336.3		1030.84	24895		1030.84	18711.8		1030.84	8641.77		1030.84	22584.9		1030.84	20423.9		1030.84	12503.5		1030.84	15955.4		1030.84	7557.64		1030.84	17695.8		1030.84
1032.62	17190.5	0.931986		1032.62	15598.7		1032.62	9000		1032.62	16027.6		1032.62	12742.5		1032.62	16120.1		1032.62	12383.8		1032.62	24983.6		1032.62	18776.2		1032.62	8649		1032.62	22673.1		1032.62	20413.1		1032.62	12573.4		1032.62	15944.7		1032.62	7580.48		1032.62	17782.2		1032.62
1034.4	17214.8	0.933308		1034.4	15576		1034.4	9009.92		1034.4	16064.4		1034.4	12747.5		1034.4	16172.2		1034.4	12387.4		1034.4	24968.6		1034.4	18768.8		1034.4	8681.89		1034.4	22559.5		1034.4	20413.6		1034.4	12524.5		1034.4	15911		1034.4	7553.9		1034.4	17804.2		1034.4
1036.18	17188.2	0.931863		1036.18	15634		1036.18	9007.06		1036.18	16123.8		1036.18	12736.6		1036.18	16142		1036.18	12366.1		1036.18	25014.8		1036.18	18800.2		1036.18	8702.5		1036.18	22671.1		1036.18	20447.6		1036.18	12552.5		1036.18	15957.1		1036.18	7580.98		1036.18	17787.1		1036.18
1037.95	17262.7	0.935903		1037.95	15684.5		1037.95	9051.49		1037.95	16134.3		1037.95	12814.8		1037.95	16220.4		1037.95	12417.2		1037.95	25047.1		1037.95	18906.4		1037.95	8726.96		1037.95	22729.3		1037.95	20530.8		1037.95	12600		1037.95	15997.6		1037.95	7594.15		1037.95	17887.5		1037.95
1039.73	17284.9	0.937106		1039.73	15703.4		1039.73	9055.87		1039.73	16139.6		1039.73	12850.3		1039.73	16216.1		1039.73	12481.6		1039.73	25014		1039.73	18834.3		1039.73	8694.35		1039.73	22816.1		1039.73	20520		1039.73	12577.7		1039.73	16055.6		1039.73	7571.12		1039.73	17894.8		1039.73
1041.5	17316.5	0.938822		1041.5	15688.1		1041.5	9075.77		1041.5	16188.8		1041.5	12881.2		1041.5	16292.9		1041.5	12478		1041.5	25097.1		1041.5	18938.4		1041.5	8745.19		1041.5	22723.6		1041.5	20615.6		1041.5	12645		1041.5	16072.7		1041.5	7631.32		1041.5	17917.5		1041.5
1043.28	17331.3	0.939622		1043.28	15722.5		1043.28	9079.4		1043.28	16169.2		1043.28	12867.5		1043.28	16238.4		1043.28	12458.1		1043.28	25170.2		1043.28	18901.1		1043.28	8734.65		1043.28	22820.1		1043.28	20593		1043.28	12631		1043.28	16045.4		1043.28	7639.18		1043.28	17952.6		1043.28
1045.05	17346.9	0.940466		1045.05	15784.6		1045.05	9053.13		1045.05	16242.8		1045.05	12905.5		1045.05	16295.1		1045.05	12479.1		1045.05	25219.7		1045.05	18936.8		1045.05	8751.51		1045.05	22819.2		1045.05	20638.8		1045.05	12681.7		1045.05	16117.5		1045.05	7649.62		1045.05	18000.8		1045.05
1046.83	17365.7	0.941488		1046.83	15758.5		1046.83	9078.17		1046.83	16232.4		1046.83	12913.7		1046.83	16373.6		1046.83	12535.8		1046.83	25244.1		1046.83	19017.1		1046.83	8795.23		1046.83	22903.4		1046.83	20666.5		1046.83	12670.8		1046.83	16135		1046.83	7691.72		1046.83	17977		1046.83
1048.6	17401.3	0.943417		1048.6	15856.7		1048.6	9106.58		1048.6	16258.2		1048.6	12969.8		1048.6	16330		1048.6	12558.8		1048.6	25289.7		1048.6	19014.1		1048.6	8783.93		1048.6	22932.2		1048.6	20680		1048.6	12704.8		1048.6	16212.5		1048.6	7666.24		1048.6	18040.4		1048.6
1050.38	17459.2	0.946555		1050.38	15871.9		1050.38	9110.99		1050.38	16296.6		1050.38	12938.3		1050.38	16355.7		1050.38	12539		1050.38	25271.9		1050.38	19015		1050.38	8788.94		1050.38	22939.2		1050.38	20735		1050.38	12686.8		1050.38	16215.6		1050.38	7671.72		1050.38	18004.6		1050.38
1052.15	17472.7	0.947288		1052.15	15915.1		1052.15	9145.27		1052.15	16323.9		1052.15	13028.4		1052.15	16376.6		1052.15	12565.2		1052.15	25343.8		1052.15	19130.6		1052.15	8812.08		1052.15	22994		1052.15	20786.1		1052.15	12752.5		1052.15	16216.3		1052.15	7685.08		1052.15	18079.7		1052.15
1053.92	17582.5	0.953243		1053.92	15979.6		1053.92	9161.19		1053.92	16377.2		1053.92	13009.2		1053.92	16500		1053.92	12609.5		1053.92	25403.4		1053.92	19110.8		1053.92	8796.41		1053.92	23012.6		1053.92	20858.6		1053.92	12758.2		1053.92	16265.7		1053.92	7716.77		1053.92	18082.2		1053.92
1055.69	17531.7	0.950487		1055.69	15917.9		1055.69	9166.8		1055.69	16321.9		1055.69	12986		1055.69	16423.4		1055.69	12598.9		1055.69	25374.2		1055.69	19171.9		1055.69	8845.49		1055.69	23103.3		1055.69	20873.5		1055.69	12802		1055.69	16254.4		1055.69	7737.29		1055.69	18102.2		1055.69
1057.47	17499.4	0.948738		1057.47	15961.4		1057.47	9175.54		1057.47	16350.1		1057.47	13034.5		1057.47	16433.3		1057.47	12673.6		1057.47	25459.1		1057.47	19140.5		1057.47	8832.78		1057.47	23076.2		1057.47	20793.5		1057.47	12801.2		1057.47	16250		1057.47	7736.05		1057.47	18094.8		1057.47
1059.24	17646.2	0.956692		1059.24	15943.6		1059.24	9216.56		1059.24	16418		1059.24	13047.1		1059.24	16481.7		1059.24	12652.7		1059.24	25468.1		1059.24	19199.4		1059.24	8885.41		1059.24	23141.3		1059.24	20831.9		1059.24	12832.7		1059.24	16364.1		1059.24	7714.75		1059.24	18214.4		1059.24
1061.01	17607.1	0.954574		1061.01	15974.8		1061.01	9177.58		1061.01	16439.8		1061.01	13118.4		1061.01	16544.5		1061.01	12697.4		1061.01	25535.3		1061.01	19277		1061.01	8857.3		1061.01	23183.3		1061.01	20900.4		1061.01	12872.1		1061.01	16353.9		1061.01	7735.69		1061.01	18215.3		1061.01
1062.78	17645	0.95663		1062.78	15987.2		1062.78	9222.31		1062.78	16491.6		1062.78	13117.6		1062.78	16488.6		1062.78	12688.7		1062.78	25530.6		1062.78	19251.3		1062.78	8909.24		1062.78	23159.9		1062.78	20902.2		1062.78	12847.3		1062.78	16333.6		1062.78	7732.42		1062.78	18247.6		1062.78
1064.55	17653.5	0.957091		1064.55	15972.6		1064.55	9231.23		1064.55	16466.6		1064.55	13017.9		1064.55	16509.3		1064.55	12692.7		1064.55	25569.1		1064.55	19256.4		1064.55	8909.4		1064.55	23165		1064.55	20950.6		1064.55	12851.3		1064.55	16306.9		1064.55	7747.2		1064.55	18277.8		1064.55
1066.32	17662.8	0.957592		1066.32	16066.6		1066.32	9236.41		1066.32	16536.7		1066.32	13115.5		1066.32	16566.6		1066.32	12722.5		1066.32	25605		1066.32	19288.1		1066.32	8946.72		1066.32	23286.1		1066.32	21013.1		1066.32	12866.3		1066.32	16404.1		1066.32	7771.92		1066.32	18302.7		1066.32
1068.09	17697.2	0.959461		1068.09	16096.6		1068.09	9283.98		1068.09	16559.8		1068.09	13201.5		1068.09	16573.1		1068.09	12761.5		1068.09	25679.9		1068.09	19376.2		1068.09	8940.4		1068.09	23306.8		1068.09	21059.5		1068.09	12872		1068.09	16401.2		1068.09	7799.23		1068.09	18370		1068.09
1069.86	17723.8	0.960903		1069.86	16112.3		1069.86	9250.71		1069.86	16539.9		1069.86	13218.9		1069.86	16578.3		1069.86	12723.8		1069.86	25626.2		1069.86	19355.2		1069.86	8939.04		1069.86	23284		1069.86	21038.5		1069.86	12910.6		1069.86	16372.8		1069.86	7787.96		1069.86	18302.3		1069.86
1071.63	17828.6	0.96658		1071.63	16162.9		1071.63	9311.96		1071.63	16611.7		1071.63	13261.4		1071.63	16676		1071.63	12776.1		1071.63	25741		1071.63	19419.3		1071.63	8969.06		1071.63	23368		1071.63	21130.3		1071.63	12996.1		1071.63	16526.5		1071.63	7805.67		1071.63	18427.3		1071.63
1073.4	17762.2	0.962985		1073.4	16160.3		1073.4	9326.18		1073.4	16661.8		1073.4	13258.7		1073.4	16707.4		1073.4	12857.1		1073.4	25791		1073.4	19461.4		1073.4	9005.49		1073.4	23411.6		1073.4	21148.4		1073.4	12984.3		1073.4	16520.3		1073.4	7831.2		1073.4	18439.8		1073.4
1075.17	17901.3	0.970522		1075.17	16251.3		1075.17	9366.98		1075.17	16668.2		1075.17	13307		1075.17	16703.1		1075.17	12851.6		1075.17	25844.2		1075.17	19504.9		1075.17	8995.55		1075.17	23417.4		1075.17	21218.3		1075.17	13053.3		1075.17	16596.8		1075.17	7797.52		1075.17	18486.8		1075.17
1076.94	17946.2	0.972957		1076.94	16253		1076.94	9485.54		1076.94	16736.8		1076.94	13437.1		1076.94	16783.8		1076.94	12975.5		1076.94	25972.5		1076.94	19532.7		1076.94	9075.43		1076.94	23563.7		1076.94	21229.5		1076.94	13117.2		1076.94	16619.8		1076.94	7836.34		1076.94	18601.8		1076.94
1078.71	18125.8	0.982696		1078.71	16372.3		1078.71	9628.2		1078.71	16812.4		1078.71	13630.5		1078.71	16813.5		1078.71	13079.7		1078.71	26139.1		1078.71	19742.1		1078.71	9086.43		1078.71	23662.9		1078.71	21382.2		1078.71	13272.8		1078.71	16685.1		1078.71	7847.39		1078.71	18703.2		1078.71
1080.47	18833.4	1.02106		1080.47	16846.9		1080.47	10473.8		1080.47	17059.4		1080.47	14727.7		1080.47	16886		1080.47	13769		1080.47	27041.6		1080.47	20528		1080.47	9245.96		1080.47	24228.1		1080.47	21678.7		1080.47	13806.3		1080.47	17092.6		1080.47	7829.36		1080.47	19521.9		1080.47
1082.24	21540.9	1.16784		1082.24	18726.7		1082.24	11586.9		1082.24	18304.9		1082.24	18170.4		1082.24	17423.4		1082.24	16147.7		1082.24	29232.1		1082.24	22777.4		1082.24	9971.65		1082.24	25981.1		1082.24	23332		1082.24	15153.9		1082.24	18760.8		1082.24	7938.62		1082.24	21948.8		1082.24
1084.01	24470	1.32665		1084.01	21455.9		1084.01	11848.1		1084.01	19397		1084.01	20007.2		1084.01	18027.3		1084.01	17960.1		1084.01	30986.5		1084.01	24289.6		1084.01	10658.9		1084.01	27237		1084.01	25985.5		1084.01	16037.1		1084.01	20096.7		1084.01	7980.27		1084.01	24652.9		1084.01
1085.77	24817	1.34546		1085.77	22258.2		1085.77	11413.1		1085.77	19694.5		1085.77	20067.9		1085.77	18097.3		1085.77	18058.9		1085.77	30839.2		1085.77	24565.5		1085.77	10622.5		1085.77	27183.2		1085.77	26385.2		1085.77	15939.3		1085.77	20191.6		1085.77	8020.87		1085.77	24768		1085.77
1087.54	22862.6	1.2395		1087.54	20322.6		1087.54	10421.6		1087.54	19039.9		1087.54	18437.1		1087.54	17888.4		1087.54	16717		1087.54	28945.4		1087.54	23416.3		1087.54	10058.8		1087.54	25773.6		1087.54	24967.8		1087.54	14777.4		1087.54	19785.3		1087.54	7966.99		1087.54	22244.2		1087.54
1089.31	19783.4	1.07256		1089.31	17843.7		1089.31	9757.68		1089.31	17668.3		1089.31	15352.5		1089.31	17398.2		1089.31	14431.5		1089.31	27149.4		1089.31	21164.1		1089.31	9415.77		1089.31	24422.2		1089.31	22674.8		1089.31	13712.8		1089.31	18232.1		1089.31	7987.49		1089.31	19833.9		1089.31
1091.07	18524.9	1.00433		1091.07	16740.3		1091.07	9521.12		1091.07	17078.2		1091.07	13904.4		1091.07	17069.9		1091.07	13309.1		1091.07	26361.2		1091.07	20077		1091.07	9201.55		1091.07	23824.5		1091.07	21789.7		1091.07	13316.1		1091.07	17106.2		1091.07	7943.77		1091.07	18942.9		1091.07
1092.84	18210	0.987262		1092.84	16470.3		1092.84	9472.73		1092.84	16927.4		1092.84	13618.7		1092.84	16956.1		1092.84	13088.4		1092.84	26220.6		1092.84	19834.7		1092.84	9132.45		1092.84	23797		1092.84	21608		1092.84	13256.6		1092.84	16904.1		1092.84	7966.63		1092.84	18794.7		1092.84
1094.6	18126	0.982709		1094.6	16417.9		1094.6	9463.74		1094.6	16929		1094.6	13507		1094.6	16919.6		1094.6	13061.3		1094.6	26235.6		1094.6	19817.8		1094.6	9129.22		1094.6	23687.5		1094.6	21557.7		1094.6	13213.7		1094.6	16819.2		1094.6	7953.38		1094.6	18785.7		1094.6
1096.37	18090.9	0.980802		1096.37	16439.3		1096.37	9477.25		1096.37	16963.4		1096.37	13500.2		1096.37	16958.3		1096.37	13037.5		1096.37	26222.3		1096.37	19806.8		1096.37	9126.21		1096.37	23772.3		1096.37	21523.7		1096.37	13213.9		1096.37	16779.1		1096.37	7988.83		1096.37	18784.4		1096.37
1098.13	18147.4	0.983868		1098.13	16516.1		1098.13	9462.96		1098.13	16944.8		1098.13	13447.3		1098.13	16970.8		1098.13	13052.4		1098.13	26232.5		1098.13	19657.2		1098.13	9139.12		1098.13	23830.8		1098.13	21485.4		1098.13	13258.2		1098.13	16829.1		1098.13	7964.9		1098.13	18751.3		1098.13
1099.89	18112.1	0.981951		1099.89	16428.8		1099.89	9479.1		1099.89	16985.8		1099.89	13461.8		1099.89	17009.8		1099.89	13036		1099.89	26311.7		1099.89	19870.5		1099.89	9200.26		1099.89	23847.2		1099.89	21586.4		1099.89	13252.5		1099.89	16807.2		1099.89	7990.2		1099.89	18764.4		1099.89
1101.66	18163	0.98471		1101.66	16487.3		1101.66	9482.66		1101.66	17044.5		1101.66	13507.3		1101.66	17004.8		1101.66	13123.3		1101.66	26275		1101.66	19869.6		1101.66	9167.08		1101.66	23870.8		1101.66	21578.6		1101.66	13279.2		1101.66	16890.3		1101.66	7996.73		1101.66	18838.4		1101.66
1103.42	18130.5	0.982951		1103.42	16441		1103.42	9470.63		1103.42	16994.1		1103.42	13495.2		1103.42	17035.7		1103.42	13083.2		1103.42	26290.9		1103.42	19886.5		1103.42	9194		1103.42	23833		1103.42	21557.1		1103.42	13240		1103.42	16812.5		1103.42	8034.41		1103.42	18819.1		1103.42
1105.18	18179.4	0.985604		1105.18	16537.5		1105.18	9516.97		1105.18	17059		1105.18	13473.6		1105.18	17097.4		1105.18	13137.5		1105.18	26351.5		1105.18	19831.8		1105.18	9190.32		1105.18	23938		1105.18	21618.4		1105.18	13298.2		1105.18	16946.6		1105.18	8044.8		1105.18	18871		1105.18
1106.94	18195.3	0.986462		1106.94	16579.6		1106.94	9551.66		1106.94	17060.2		1106.94	13530.9		1106.94	17123.1		1106.94	13114.1		1106.94	26383.8		1106.94	19948.3		1106.94	9231.66		1106.94	23924.9		1106.94	21638.4		1106.94	13271.1		1106.94	16901		1106.94	8051.73		1106.94	18915.9		1106.94
1108.71	18211.2	0.987326		1108.71	16598.5		1108.71	9559.76		1108.71	17095.7		1108.71	13573.5		1108.71	17127.1		1108.71	13172.8		1108.71	26429.1		1108.71	19979.6		1108.71	9245.2		1108.71	24014.5		1108.71	21682.2		1108.71	13357.5		1108.71	16926.8		1108.71	8049		1108.71	18938.9		1108.71
1110.47	18256.6	0.98979		1110.47	16517.5		1110.47	9540.77		1110.47	17105.9		1110.47	13527.7		1110.47	17142.7		1110.47	13163.3		1110.47	26361.4		1110.47	19986.3		1110.47	9230.65		1110.47	24021.4		1110.47	21628.6		1110.47	13299.8		1110.47	16916.6		1110.47	8096.87		1110.47	18947.5		1110.47
1112.23	18250.4	0.989451		1112.23	16586.6		1112.23	9569.25		1112.23	17130.9		1112.23	13540.4		1112.23	17147.2		1112.23	13159.2		1112.23	26493.4		1112.23	20031.2		1112.23	9210.32		1112.23	23920.8		1112.23	21701.9		1112.23	13341.5		1112.23	16905.3		1112.23	8057.35		1112.23	18926		1112.23
1113.99	18302.5	0.992277		1113.99	16719.8		1113.99	9580.06		1113.99	17224.2		1113.99	13655.3		1113.99	17206.3		1113.99	13224.7		1113.99	26513.3		1113.99	20126.4		1113.99	9253.04		1113.99	24094.6		1113.99	21755.9		1113.99	13384.6		1113.99	16959.6		1113.99	8103.08		1113.99	19012.1		1113.99
1115.75	18336.5	0.994121		1115.75	16656.5		1115.75	9581.15		1115.75	17198.5		1115.75	13541.3		1115.75	17182.5		1115.75	13200.5		1115.75	26515.8		1115.75	19952.5		1115.75	9272.02		1115.75	24174		1115.75	21791		1115.75	13351		1115.75	16984.2		1115.75	8118.67		1115.75	18988.5		1115.75
1117.51	18369.6	0.995913		1117.51	16702.6		1117.51	9595.1		1117.51	17215.6		1117.51	13658.5		1117.51	17250.5		1117.51	13235.1		1117.51	26601.5		1117.51	20041.2		1117.51	9285.12		1117.51	24198.1		1117.51	21812.3		1117.51	13379.2		1117.51	16997.8		1117.51	8143.91		1117.51	19019.9		1117.51
1119.27	18395.3	0.997306		1119.27	16664		1119.27	9635.49		1119.27	17235.7		1119.27	13638.7		1119.27	17266.5		1119.27	13226.6		1119.27	26626.5		1119.27	20122.2		1119.27	9271.55		1119.27	24238.3		1119.27	21802.2		1119.27	13378.5		1119.27	17063		1119.27	8159.51		1119.27	19042.1		1119.27
1121.03	18427.1	0.999031		1121.03	16739.9		1121.03	9634.35		1121.03	17246.9		1121.03	13631.7		1121.03	17300.2		1121.03	13262.3		1121.03	26639.1		1121.03	20175.3		1121.03	9318.97		1121.03	24178.2		1121.03	21953.2		1121.03	13435.1		1121.03	17052.3		1121.03	8173.4		1121.03	19107		1121.03
1122.79	18365.8	0.995708		1122.79	16765		1122.79	9577.58		1122.79	17176.9		1122.79	13669.9		1122.79	17254.8		1122.79	13223.7		1122.79	26659.4		1122.79	20119.1		1122.79	9319.69		1122.79	24162.8		1122.79	21822.2		1122.79	13403.7		1122.79	17018.1		1122.79	8149.68		1122.79	19116.9		1122.79
1124.55	18432.7	0.999333		1124.55	16796		1124.55	9641.91		1124.55	17228.8		1124.55	13718.6		1124.55	17334.1		1124.55	13230.5		1124.55	26708.3		1124.55	20198.1		1124.55	9330.29		1124.55	24229		1124.55	21918		1124.55	13447.8		1124.55	17110.6		1124.55	8184.23		1124.55	19143.3		1124.55
1126.31	18523.4	1.00425		1126.31	16778.3		1126.31	9669.47		1126.31	17343		1126.31	13741.1		1126.31	17362.6		1126.31	13304.8		1126.31	26768.6		1126.31	20290.3		1126.31	9352.33		1126.31	24288.2		1126.31	21969.7		1126.31	13489.4		1126.31	17117.4		1126.31	8201.14		1126.31	19129.6		1126.31
1128.06	18481.6	1.00198		1128.06	16790		1128.06	9671.31		1128.06	17323		1128.06	13740.1		1128.06	17344		1128.06	13274.3		1128.06	26742.3		1128.06	20206.3		1128.06	9327.18		1128.06	24298.3		1128.06	21923.3		1128.06	13466.7		1128.06	17140.5		1128.06	8238.35		1128.06	19157		1128.06
1129.82	18567.7	1.00665		1129.82	16811.1		1129.82	9703.8		1129.82	17337.6		1129.82	13720.9		1129.82	17378.7		1129.82	13344.7		1129.82	26776.7		1129.82	20277.4		1129.82	9330.39		1129.82	24301.5		1129.82	22021.4		1129.82	13538		1129.82	17151.8		1129.82	8254.91		1129.82	19193.7		1129.82
1131.58	18552.3	1.00582		1131.58	16835.5		1131.58	9684.24		1131.58	17363.7		1131.58	13697.4		1131.58	17368.9		1131.58	13351.2		1131.58	26816.5		1131.58	20286.6		1131.58	9353.32		1131.58	24334.6		1131.58	22029.8		1131.58	13484.9		1131.58	17244.5		1131.58	8298.96		1131.58	19235.4		1131.58
1133.34	18522.8	1.00422		1133.34	16839.4		1133.34	9679.1		1133.34	17353.2		1133.34	13788.9		1133.34	17398		1133.34	13333.4		1133.34	26822.6		1133.34	20327.3		1133.34	9375.09		1133.34	24330.6		1133.34	22050.5		1133.34	13528.1		1133.34	17115.2		1133.34	8359.73		1133.34	19179.9		1133.34
1135.09	18497.1	1.00282		1135.09	16898.5		1135.09	9691.07		1135.09	17417.6		1135.09	13789.5		1135.09	17470.9		1135.09	13389.6		1135.09	26834.1		1135.09	20309.1		1135.09	9425.16		1135.09	24447.5		1135.09	22005.6		1135.09	13544.4		1135.09	17198.6		1135.09	8380.55		1135.09	19257.2		1135.09
1136.85	18529.3	1.00457		1136.85	16886.7		1136.85	9766.25		1136.85	17441.1		1136.85	13815.7		1136.85	17402.4		1136.85	13416.4		1136.85	26862.3		1136.85	20347.1		1136.85	9394.33		1136.85	24405.4		1136.85	22093.9		1136.85	13569.5		1136.85	17315.3		1136.85	8369.59		1136.85	19268.5		1136.85
1138.6	18618.1	1.00939		1138.6	16912.3		1138.6	9736.6		1138.6	17482.4		1138.6	13818.1		1138.6	17469.1		1138.6	13409.2		1138.6	26921.4		1138.6	20365.4		1138.6	9423.79		1138.6	24530.5		1138.6	22087.3		1138.6	13564.5		1138.6	17282.4		1138.6	8374.54		1138.6	19307.9		1138.6
1140.36	18630.2	1.01004		1140.36	16873.4		1140.36	9791.15		1140.36	17527.6		1140.36	13818.6		1140.36	17472.8		1140.36	13413.9		1140.36	26940.3		1140.36	20341.8		1140.36	9425.03		1140.36	24511.4		1140.36	22218.2		1140.36	13604.1		1140.36	17263.2		1140.36	8369.01		1140.36	19368.8		1140.36
1142.12	18708	1.01426		1142.12	16925.9		1142.12	9804.65		1142.12	17521.8		1142.12	13828.1		1142.12	17526.9		1142.12	13457.2		1142.12	26986.8		1142.12	20440.4		1142.12	9481.14		1142.12	24512		1142.12	22192.8		1142.12	13619.3		1142.12	17292.1		1142.12	8345.03		1142.12	19393		1142.12
1143.87	18670.9	1.01225		1143.87	16992.4		1143.87	9799.51		1143.87	17495.7		1143.87	13871		1143.87	17475.3		1143.87	13474		1143.87	27080		1143.87	20526.2		1143.87	9457.34		1143.87	24555.4		1143.87	22188.7		1143.87	13632.6		1143.87	17413.6		1143.87	8323.43		1143.87	19344.9		1143.87
1145.62	18619.2	1.00945		1145.62	17063.7		1145.62	9836.61		1145.62	17577.7		1145.62	13914.5		1145.62	17598.9		1145.62	13528.3		1145.62	27155.9		1145.62	20492.4		1145.62	9472.38		1145.62	24618		1145.62	22278		1145.62	13680.2		1145.62	17376.7		1145.62	8318.12		1145.62	19429.5		1145.62
1147.38	18703.6	1.01402		1147.38	17013.3		1147.38	9809.67		1147.38	17624.3		1147.38	13874		1147.38	17582.5		1147.38	13532.6		1147.38	27135.5		1147.38	20512.2		1147.38	9501.32		1147.38	24593.2		1147.38	22202.1		1147.38	13665.7		1147.38	17409.5		1147.38	8269.32		1147.38	19485.2		1147.38
1149.13	18713.1	1.01454		1149.13	17066.2		1149.13	9831.64		1149.13	17616.1		1149.13	13907.1		1149.13	17604.6		1149.13	13482.1		1149.13	27120.3		1149.13	20566.1		1149.13	9508.32		1149.13	24640.9		1149.13	22254		1149.13	13666.2		1149.13	17350.4		1149.13	8296.12		1149.13	19461.8		1149.13
1150.89	18730.9	1.0155		1150.89	17072.1		1150.89	9848.97		1150.89	17612.5		1150.89	13971.9		1150.89	17639.7		1150.89	13536.1		1150.89	27182.3		1150.89	20544		1150.89	9560.04		1150.89	24646.5		1150.89	22302.1		1150.89	13724		1150.89	17377.4		1150.89	8316.55		1150.89	19497.5		1150.89
1152.64	18845.3	1.0217		1152.64	17220.1		1152.64	9859.89		1152.64	17643.2		1152.64	13981.5		1152.64	17652.2		1152.64	13554.2		1152.64	27238.5		1152.64	20566.8		1152.64	9534.56		1152.64	24702.6		1152.64	22385.6		1152.64	13721		1152.64	17358		1152.64	8298.48		1152.64	19518.3		1152.64
1154.39	18831.3	1.02094		1154.39	17148.3		1154.39	9900.36		1154.39	17675.3		1154.39	13987.7		1154.39	17642.6		1154.39	13559.6		1154.39	27264.1		1154.39	20529.9		1154.39	9520.77		1154.39	24757.6		1154.39	22410		1154.39	13724.1		1154.39	17473.5		1154.39	8335.93		1154.39	19528		1154.39
1156.14	18883	1.02375		1156.14	17134		1156.14	9901.27		1156.14	17683.2		1156.14	14029.9		1156.14	17704.6		1156.14	13551.9		1156.14	27274.9		1156.14	20631.8		1156.14	9582.05		1156.14	24788.5		1156.14	22422.6		1156.14	13742.5		1156.14	17493.9		1156.14	8306.48		1156.14	19604.4		1156.14
1157.9	18871.6	1.02313		1157.9	17223.2		1157.9	9873.94		1157.9	17746.5		1157.9	14023.9		1157.9	17709.4		1157.9	13636.8		1157.9	27329		1157.9	20719		1157.9	9558.02		1157.9	24843.5		1157.9	22477.6		1157.9	13776.2		1157.9	17531		1157.9	8328.44		1157.9	19599.5		1157.9
1159.65	18908.7	1.02514		1159.65	17201.9		1159.65	9899.8		1159.65	17746		1159.65	14018.4		1159.65	17787.6		1159.65	13627.2		1159.65	27366.1		1159.65	20711.8		1159.65	9555.29		1159.65	24843.6		1159.65	22413.5		1159.65	13790.4		1159.65	17527.4		1159.65	8352.96		1159.65	19629.3		1159.65
1161.4	18864	1.02272		1161.4	17161.7		1161.4	9920.17		1161.4	17731		1161.4	14064.3		1161.4	17718.1		1161.4	13639.6		1161.4	27352.4		1161.4	20681.8		1161.4	9567.63		1161.4	24902.3		1161.4	22432.8		1161.4	13752.8		1161.4	17485.1		1161.4	8329.39		1161.4	19644.1		1161.4
1163.15	18897.2	1.02452		1163.15	17212.9		1163.15	9957.55		1163.15	17766.3		1163.15	14066.8		1163.15	17786.3		1163.15	13594.9		1163.15	27385.3		1163.15	20694.7		1163.15	9605.7		1163.15	24879.8		1163.15	22458.9		1163.15	13841.5		1163.15	17587.1		1163.15	8347.95		1163.15	19662.7		1163.15
1164.9	18931.9	1.0264		1164.9	17229.8		1164.9	9962.64		1164.9	17855.5		1164.9	14110.7		1164.9	17776		1164.9	13684.2		1164.9	27491.9		1164.9	20718		1164.9	9629.98		1164.9	24932		1164.9	22605.3		1164.9	13838.8		1164.9	17577.7		1164.9	8359.86		1164.9	19673.9		1164.9
1166.65	19042.6	1.0324		1166.65	17262.8		1166.65	9997.21		1166.65	17873		1166.65	14147.3		1166.65	17863.8		1166.65	13685.4		1166.65	27480.7		1166.65	20852.2		1166.65	9624.72		1166.65	24995.4		1166.65	22543.4		1166.65	13894.8		1166.65	17572.3		1166.65	8403.41		1166.65	19743.4		1166.65
1168.4	18997.2	1.02994		1168.4	17278.6		1168.4	9950.1		1168.4	17817.6		1168.4	14102.2		1168.4	17821.2		1168.4	13677.5		1168.4	27452		1168.4	20826.9		1168.4	9625.02		1168.4	24951.4		1168.4	22542.9		1168.4	13862.1		1168.4	17587.8		1168.4	8373.17		1168.4	19699.8		1168.4
1170.15	18965.3	1.02821		1170.15	17254.1		1170.15	9975.46		1170.15	17897.1		1170.15	14063.4		1170.15	17883.2		1170.15	13692.3		1170.15	27499.3		1170.15	20773.3		1170.15	9610.88		1170.15	24994.1		1170.15	22576		1170.15	13872.7		1170.15	17659.5		1170.15	8400.02		1170.15	19792.4		1170.15
1171.9	19033.7	1.03192		1171.9	17370		1171.9	10014.6		1171.9	17893.5		1171.9	14168		1171.9	17951.9		1171.9	13726.8		1171.9	27586.6		1171.9	20786.2		1171.9	9653.88		1171.9	25044.3		1171.9	22732.6		1171.9	13911.1		1171.9	17654.5		1171.9	8405.16		1171.9	19752.8		1171.9
1173.65	19096.7	1.03533		1173.65	17345.3		1173.65	9964.4		1173.65	17908.7		1173.65	14118.1		1173.65	17917.7		1173.65	13762.4		1173.65	27615.3		1173.65	20898.6		1173.65	9678.77		1173.65	25097		1173.65	22680.2		1173.65	13924.5		1173.65	17686.9		1173.65	8395.92		1173.65	19814.9		1173.65
1175.4	19060.4	1.03336		1175.4	17258.7		1175.4	10003		1175.4	17933.3		1175.4	14130		1175.4	17886		1175.4	13731.5		1175.4	27659.6		1175.4	20878.4		1175.4	9663.72		1175.4	25088.8		1175.4	22674.3		1175.4	13915		1175.4	17706.8		1175.4	8406.22		1175.4	19807.9		1175.4
1177.15	19085.1	1.0347		1177.15	17315.6		1177.15	10047.6		1177.15	17984.6		1177.15	14162.1		1177.15	17900.2		1177.15	13734.6		1177.15	27609.9		1177.15	20924.4		1177.15	9679.43		1177.15	25040.3		1177.15	22653.8		1177.15	13903.1		1177.15	17703.1		1177.15	8410.6		1177.15	19829.5		1177.15
1178.89	19096.8	1.03534		1178.89	17397.7		1178.89	10040.3		1178.89	17942.5		1178.89	14145.9		1178.89	17905.5		1178.89	13771.1		1178.89	27633.8		1178.89	20886.5		1178.89	9671.35		1178.89	25130.8		1178.89	22642.2		1178.89	13940.9		1178.89	17720.2		1178.89	8432.17		1178.89	19852.9		1178.89
1180.64	19062.2	1.03346		1180.64	17340.4		1180.64	10040.3		1180.64	17949.2		1180.64	14205.2		1180.64	17947.3		1180.64	13764.9		1180.64	27642.3		1180.64	20959.5		1180.64	9708.17		1180.64	25131.4		1180.64	22698.6		1180.64	13953.2		1180.64	17704.9		1180.64	8414.06		1180.64	19831.8		1180.64
1182.39	19158.4	1.03868		1182.39	17376.9		1182.39	10106.3		1182.39	18009.4		1182.39	14269		1182.39	17990		1182.39	13844.8		1182.39	27726.7		1182.39	21026.9		1182.39	9727.42		1182.39	25192.2		1182.39	22794.5		1182.39	13963.8		1182.39	17700.5		1182.39	8463.32		1182.39	19959.9		1182.39
1184.13	19202.9	1.04109		1184.13	17458.1		1184.13	10066.1		1184.13	18082.2		1184.13	14282.5		1184.13	18006.5		1184.13	13880.3		1184.13	27780.6		1184.13	20950.6		1184.13	9713.43		1184.13	25259.4		1184.13	22731.1		1184.13	14012.9		1184.13	17748.7		1184.13	8470.44		1184.13	19934.2		1184.13
1185.88	19185	1.04012		1185.88	17466.7		1185.88	10087.7		1185.88	18116		1185.88	14264.5		1185.88	18032.3		1185.88	13863.7		1185.88	27790.3		1185.88	21019.5		1185.88	9738.05		1185.88	25316.5		1185.88	22729.6		1185.88	14002.4		1185.88	17772.6		1185.88	8487.15		1185.88	19960.1		1185.88
1187.63	19235.7	1.04287		1187.63	17482.2		1187.63	10109.1		1187.63	18109.4		1187.63	14333		1187.63	18065.5		1187.63	13855.9		1187.63	27822.2		1187.63	21117.8		1187.63	9753.73		1187.63	25344.8		1187.63	22831.9		1187.63	14053.5		1187.63	17787.2		1187.63	8496.71		1187.63	20033.5		1187.63
1189.37	19302.2	1.04648		1189.37	17600.3		1189.37	10129.3		1189.37	18109.2		1189.37	14273.2		1189.37	18066		1189.37	13916.1		1189.37	27848.5		1189.37	21102.5		1189.37	9775.7		1189.37	25406.9		1189.37	22835		1189.37	14078.1		1189.37	17836		1189.37	8517.05		1189.37	20062.7		1189.37
1191.12	19288.6	1.04574		1191.12	17549.7		1191.12	10128.2		1191.12	18111.9		1191.12	14328.7		1191.12	18107.2		1191.12	13866.9		1191.12	27867.8		1191.12	21103.8		1191.12	9743.13		1191.12	25387.5		1191.12	22888		1191.12	14068.7		1191.12	17836.7		1191.12	8475.77		1191.12	20039		1191.12
1192.86	19329.1	1.04793		1192.86	17587.8		1192.86	10146.4		1192.86	18180.4		1192.86	14325.8		1192.86	18127.6		1192.86	13900.5		1192.86	27981.4		1192.86	21164.7		1192.86	9795.58		1192.86	25390.6		1192.86	22993.4		1192.86	14092.8		1192.86	17907.6		1192.86	8524.93		1192.86	20135.5		1192.86
1194.61	19344.2	1.04875		1194.61	17592.6		1194.61	10182.9		1194.61	18226.5		1194.61	14357.4		1194.61	18188.6		1194.61	13970.5		1194.61	28008.6		1194.61	21166.1		1194.61	9847.38		1194.61	25445.4		1194.61	22941.1		1194.61	14150.8		1194.61	17921.3		1194.61	8562.85		1194.61	20149		1194.61
1196.35	19362.3	1.04973		1196.35	17618		1196.35	10182.7		1196.35	18219.8		1196.35	14353.7		1196.35	18158.3		1196.35	13948.4		1196.35	27959.1		1196.35	21213		1196.35	9807.25		1196.35	25466.2		1196.35	22960.4		1196.35	14151.8		1196.35	17998.1		1196.35	8552.2		1196.35	20138.9		1196.35
1198.1	19371.6	1.05024		1198.1	17651.6		1198.1	10171.4		1198.1	18222.1		1198.1	14440.6		1198.1	18216.7		1198.1	13964.2		1198.1	28004.2		1198.1	21202.9		1198.1	9832.9		1198.1	25417.4		1198.1	23055.5		1198.1	14114.3		1198.1	17940.3		1198.1	8535.42		1198.1	20211.2		1198.1
1199.84	19352.6	1.04921		1199.84	17708.8		1199.84	10150		1199.84	18200.1		1199.84	14374.5		1199.84	18141.8		1199.84	13956.2		1199.84	27996		1199.84	21191.3		1199.84	9838.48		1199.84	25423		1199.84	22981.9		1199.84	14133.5		1199.84	17913.8		1199.84	8534.07		1199.84	20157.9		1199.84
1201.58	19324.6	1.04769		1201.58	17662.3		1201.58	10216.8		1201.58	18271.7		1201.58	14317.8		1201.58	18205.1		1201.58	13954.8		1201.58	28024		1201.58	21265		1201.58	9830.93		1201.58	25483.6		1201.58	23069.6		1201.58	14158		1201.58	18000.2		1201.58	8550.36		1201.58	20186.9		1201.58
1203.33	19447.1	1.05433		1203.33	17652.3		1203.33	10172.6		1203.33	18212.4		1203.33	14421.9		1203.33	18222.5		1203.33	13985.9		1203.33	28063.2		1203.33	21289.2		1203.33	9862.04		1203.33	25528.5		1203.33	22992.4		1203.33	14157.7		1203.33	17982.3		1203.33	8577.19		1203.33	20280		1203.33
1205.07	19416.6	1.05268		1205.07	17722.1		1205.07	10225.2		1205.07	18348.3		1205.07	14495.4		1205.07	18271.4		1205.07	14041.5		1205.07	28146.5		1205.07	21325.5		1205.07	9862.58		1205.07	25561.1		1205.07	23094.5		1205.07	14188.4		1205.07	18042.8		1205.07	8570.43		1205.07	20291		1205.07
1206.81	19491.7	1.05675		1206.81	17716.8		1206.81	10220.8		1206.81	18344.9		1206.81	14418.6		1206.81	18330.8		1206.81	14054.5		1206.81	28163.4		1206.81	21440.2		1206.81	9920.61		1206.81	25624.2		1206.81	23152.5		1206.81	14252		1206.81	17993.3		1206.81	8600.06		1206.81	20280		1206.81
1208.55	19535	1.0591		1208.55	17771.8		1208.55	10273.9		1208.55	18401.5		1208.55	14484		1208.55	18371.1		1208.55	14088.3		1208.55	28202.4		1208.55	21404.6		1208.55	9913.79		1208.55	25676.2		1208.55	23214.3		1208.55	14247.2		1208.55	18106.8		1208.55	8623.42		1208.55	20319.2		1208.55
1210.3	19677.8	1.06684		1210.3	17823.9		1210.3	10331.2		1210.3	18459.9		1210.3	14552.8		1210.3	18402.8		1210.3	14103		1210.3	28264.1		1210.3	21531.2		1210.3	9929.91		1210.3	25733.5		1210.3	23224.2		1210.3	14301.4		1210.3	18139.6		1210.3	8631.03		1210.3	20406.8		1210.3
1212.04	19547.8	1.05979		1212.04	17836.3		1212.04	10308.2		1212.04	18483.5		1212.04	14504.8		1212.04	18422.9		1212.04	14126.9		1212.04	28314.8		1212.04	21521.6		1212.04	9977.35		1212.04	25789.7		1212.04	23253.9		1212.04	14292.4		1212.04	18106.1		1212.04	8650.16		1212.04	20391		1212.04
1213.78	19624	1.06392		1213.78	17850.6		1213.78	10319.4		1213.78	18489.1		1213.78	14566.1		1213.78	18428.3		1213.78	14173.8		1213.78	28397.1		1213.78	21535		1213.78	9964.73		1213.78	25813.8		1213.78	23240.5		1213.78	14342		1213.78	18178.3		1213.78	8642.83		1213.78	20468.5		1213.78
1215.52	19627.2	1.06409		1215.52	17904.6		1215.52	10352		1215.52	18487.5		1215.52	14615.1		1215.52	18463.7		1215.52	14182.7		1215.52	28401.4		1215.52	21542.5		1215.52	9966.87		1215.52	25854		1215.52	23312.3		1215.52	14368.5		1215.52	18115.5		1215.52	8677.75		1215.52	20506		1215.52
1217.26	19744.6	1.07046		1217.26	17887.1		1217.26	10344.5		1217.26	18593.5		1217.26	14606.8		1217.26	18467.4		1217.26	14207.1		1217.26	28414.4		1217.26	21615.8		1217.26	9997.85		1217.26	25882.4		1217.26	23406.4		1217.26	14355.2		1217.26	18248.9		1217.26	8694.06		1217.26	20494.7		1217.26
1219	19649.8	1.06532		1219	17946.7		1219	10329.7		1219	18534.8		1219	14653.6		1219	18476.6		1219	14219.7		1219	28409.5		1219	21604.3		1219	10007.6		1219	25950.3		1219	23351		1219	14364.4		1219	18219.6		1219	8667.39		1219	20517.1		1219
1220.74	19701.1	1.0681		1220.74	17948.3		1220.74	10372		1220.74	18613.4		1220.74	14679.5		1220.74	18526.4		1220.74	14262		1220.74	28441.9		1220.74	21668.5		1220.74	10007.2		1220.74	25918.7		1220.74	23402.1		1220.74	14416.6		1220.74	18325.6		1220.74	8691.54		1220.74	20570.9		1220.74
1222.47	19737.9	1.0701		1222.47	17972.6		1222.47	10402.5		1222.47	18602.6		1222.47	14629		1222.47	18587.6		1222.47	14289.8		1222.47	28489.1		1222.47	21717.2		1222.47	10060.7		1222.47	25982.9		1222.47	23410.6		1222.47	14417.1		1222.47	18294.3		1222.47	8728.13		1222.47	20643.3		1222.47
1224.21	19781.1	1.07244		1224.21	18017.6		1224.21	10394.6		1224.21	18688.1		1224.21	14716.9		1224.21	18624.7		1224.21	14282.5		1224.21	28577.3		1224.21	21715.6		1224.21	10067.1		1224.21	26020.7		1224.21	23473.3		1224.21	14463.7		1224.21	18313.9		1224.21	8756.67		1224.21	20636.6		1224.21
1225.95	19779.7	1.07236		1225.95	18127.3		1225.95	10431		1225.95	18735.9		1225.95	14788.9		1225.95	18665		1225.95	14323.6		1225.95	28711.6		1225.95	21774		1225.95	10084.7		1225.95	26104.6		1225.95	23614.8		1225.95	14515.8		1225.95	18380.4		1225.95	8761.33		1225.95	20705.4		1225.95
1227.69	19965.7	1.08245		1227.69	18143.4		1227.69	10485.7		1227.69	18793.5		1227.69	14825.2		1227.69	18750.1		1227.69	14388.4		1227.69	28760.8		1227.69	21780.3		1227.69	10122.9		1227.69	26255.9		1227.69	23644.4		1227.69	14584.2		1227.69	18397.8		1227.69	8796.54		1227.69	20746		1227.69
1229.43	19919.7	1.07995		1229.43	18060.6		1229.43	10477.3		1229.43	18789.9		1229.43	14811.5		1229.43	18700.3		1229.43	14407		1229.43	28785		1229.43	21835.1		1229.43	10134		1229.43	26178.4		1229.43	23628.4		1229.43	14567.3		1229.43	18439.2		1229.43	8791.93		1229.43	20791.4		1229.43
1231.17	19945	1.08132		1231.17	18153.9		1231.17	10505.8		1231.17	18801.6		1231.17	14837.7		1231.17	18769.1		1231.17	14392.1		1231.17	28828.5		1231.17	21794.7		1231.17	10123.6		1231.17	26158.6		1231.17	23669.9		1231.17	14546.3		1231.17	18456.9		1231.17	8825.9		1231.17	20833.7		1231.17
1232.9	19992.5	1.0839		1232.9	18217.7		1232.9	10505.3		1232.9	18848.7		1232.9	14885.4		1232.9	18810.3		1232.9	14407.8		1232.9	28859.5		1232.9	21897.3		1232.9	10155.1		1232.9	26248.4		1232.9	23693		1232.9	14564.2		1232.9	18530.2		1232.9	8841.17		1232.9	20856.4		1232.9
1234.64	20001.1	1.08437		1234.64	18237.5		1234.64	10540.7		1234.64	18883.4		1234.64	14970		1234.64	18844.8		1234.64	14461.3		1234.64	28961.9		1234.64	21937.8		1234.64	10213.4		1234.64	26258.6		1234.64	23685.3		1234.64	14607.3		1234.64	18519.1		1234.64	8806.59		1234.64	20862.6		1234.64
1236.37	20074.7	1.08835		1236.37	18193.7		1236.37	10541.5		1236.37	18963.3		1236.37	14909.8		1236.37	18843.4		1236.37	14467.3		1236.37	28962.2		1236.37	22061		1236.37	10209.3		1236.37	26337.6		1236.37	23775.8		1236.37	14643		1236.37	18542.6		1236.37	8877.74		1236.37	20886.5		1236.37
1238.11	20145.2	1.09218		1238.11	18380.5		1238.11	10614.5		1238.11	18963.3		1238.11	15006.4		1238.11	18880.1		1238.11	14513		1238.11	29034		1238.11	21998.4		1238.11	10190		1238.11	26406.5		1238.11	23825.1		1238.11	14706.6		1238.11	18613.3		1238.11	8852.33		1238.11	20985.1		1238.11
1239.85	20081.5	1.08872		1239.85	18279.4		1239.85	10590.3		1239.85	19003.1		1239.85	14926.8		1239.85	18929.5		1239.85	14530.6		1239.85	29100.4		1239.85	22067.5		1239.85	10220		1239.85	26459.9		1239.85	23852.4		1239.85	14677.8		1239.85	18634.7		1239.85	8888.83		1239.85	20987.5		1239.85
1241.58	20142.5	1.09203		1241.58	18351.3		1241.58	10639.9		1241.58	19077.8		1241.58	14962.5		1241.58	18992.8		1241.58	14555.2		1241.58	29136.5		1241.58	22101.6		1241.58	10259.8		1241.58	26469.1		1241.58	23940.4		1241.58	14745		1241.58	18662.7		1241.58	8906.33		1241.58	21048.1		1241.58
1243.32	20162.5	1.09312		1243.32	18342.4		1243.32	10644.9		1243.32	19082.1		1243.32	14952.6		1243.32	19019.2		1243.32	14665.8		1243.32	29205.2		1243.32	22165		1243.32	10271.2		1243.32	26498.4		1243.32	23991		1243.32	14740.6		1243.32	18683.7		1243.32	8957.63		1243.32	21055.1		1243.32
1245.05	20271.4	1.09902		1245.05	18384.3		1245.05	10677.4		1245.05	19094.4		1245.05	15048.5		1245.05	19012.1		1245.05	14620.9		1245.05	29193.9		1245.05	22174		1245.05	10306.6		1245.05	26566.7		1245.05	23954.9		1245.05	14781.8		1245.05	18750.3		1245.05	8906.91		1245.05	21141.5		1245.05
1246.79	20197.5	1.09501		1246.79	18393.5		1246.79	10667.7		1246.79	19063.3		1246.79	15032.4		1246.79	18974.3		1246.79	14607.5		1246.79	29218.3		1246.79	22128		1246.79	10309.3		1246.79	26517.4		1246.79	23993.1		1246.79	14793.8		1246.79	18752.9		1246.79	8915.32		1246.79	21108.5		1246.79
1248.52	20207.8	1.09557		1248.52	18444.3		1248.52	10666		1248.52	19113		1248.52	15043.2		1248.52	19053.7		1248.52	14672.9		1248.52	29283.5		1248.52	22196.7		1248.52	10273.8		1248.52	26599		1248.52	24026.8		1248.52	14813.9		1248.52	18736		1248.52	8925.61		1248.52	21167.9		1248.52
1250.25	20381.6	1.10499		1250.25	18536		1250.25	10721.1		1250.25	19181.7		1250.25	15140.3		1250.25	19097.9		1250.25	14706.4		1250.25	29339.1		1250.25	22324.4		1250.25	10357.2		1250.25	26705.1		1250.25	24123.2		1250.25	14849.2		1250.25	18858.4		1250.25	8982.26		1250.25	21204.3		1250.25
1251.99	20390.1	1.10546		1251.99	18529		1251.99	10722		1251.99	19249.7		1251.99	15143.7		1251.99	19157.6		1251.99	14762.3		1251.99	29386.9		1251.99	22326.8		1251.99	10375.9		1251.99	26720		1251.99	24144.6		1251.99	14905.7		1251.99	18869.8		1251.99	9002.72		1251.99	21232.7		1251.99
1253.72	20429.1	1.10757		1253.72	18573.9		1253.72	10731.6		1253.72	19278.8		1253.72	15101		1253.72	19158.1		1253.72	14746.6		1253.72	29417.5		1253.72	22375.5		1253.72	10356.6		1253.72	26766.2		1253.72	24200.5		1253.72	14885.6		1253.72	18787.3		1253.72	8974.08		1253.72	21264.4		1253.72
1255.45	20417.8	1.10696		1255.45	18661.7		1255.45	10757.3		1255.45	19311.2		1255.45	15176.1		1255.45	19170		1255.45	14754		1255.45	29511.7		1255.45	22382.8		1255.45	10416.5		1255.45	26771.2		1255.45	24235.1		1255.45	14926		1255.45	18868.8		1255.45	9001.09		1255.45	21317.9		1255.45
1257.18	20435	1.10789		1257.18	18604.3		1257.18	10800.1		1257.18	19271.7		1257.18	15188.2		1257.18	19285.5		1257.18	14806.6		1257.18	29476.4		1257.18	22477.2		1257.18	10411.5		1257.18	26879.4		1257.18	24250.1		1257.18	14940.2		1257.18	18886.4		1257.18	8981.34		1257.18	21360.8		1257.18
1258.92	20483.2	1.1105		1258.92	18687.1		1258.92	10798		1258.92	19349.7		1258.92	15223.9		1258.92	19275.5		1258.92	14786.1		1258.92	29614.8		1258.92	22461.5		1258.92	10435.6		1258.92	26933.1		1258.92	24271.5		1258.92	14940.4		1258.92	18960.3		1258.92	9037.73		1258.92	21332.8		1258.92
1260.65	20515.2	1.11224		1260.65	18683.1		1260.65	10861.8		1260.65	19372.8		1260.65	15269.6		1260.65	19305.4		1260.65	14853.1		1260.65	29618.5		1260.65	22498.3		1260.65	10453.2		1260.65	26964.1		1260.65	24346.4		1260.65	15001.6		1260.65	18921.2		1260.65	9073.64		1260.65	21440.2		1260.65
1262.38	20553	1.11429		1262.38	18723.1		1262.38	10823.1		1262.38	19367.8		1262.38	15267.3		1262.38	19243.4		1262.38	14836		1262.38	29588.5		1262.38	22510		1262.38	10442.5		1262.38	26921.6		1262.38	24366.3		1262.38	14953.5		1262.38	18946.5		1262.38	9063.65		1262.38	21428.2		1262.38
1264.11	20521.3	1.11257		1264.11	18710.3		1264.11	10848.8		1264.11	19441.1		1264.11	15241.2		1264.11	19368.8		1264.11	14846		1264.11	29655.2		1264.11	22534.2		1264.11	10463.6		1264.11	26943.1		1264.11	24367.7		1264.11	15010.7		1264.11	18981.3		1264.11	9091.18		1264.11	21408.3		1264.11
1265.84	20627.3	1.11831		1265.84	18776.7		1265.84	10894		1265.84	19428.4		1265.84	15320.2		1265.84	19374.5		1265.84	14875.8		1265.84	29681.2		1265.84	22593.4		1265.84	10471.7		1265.84	27076.5		1265.84	24374.8		1265.84	15063.5		1265.84	19017.2		1265.84	9072.19		1265.84	21496.4		1265.84
1267.57	20627.5	1.11832		1267.57	18777.1		1267.57	10896.6		1267.57	19436.7		1267.57	15310.4		1267.57	19391.5		1267.57	14862.6		1267.57	29683.1		1267.57	22630.4		1267.57	10466		1267.57	27099.6		1267.57	24426		1267.57	15100.6		1267.57	19083		1267.57	9085.9		1267.57	21523.9		1267.57
1269.3	20644	1.11922		1269.3	18776		1269.3	10901.9		1269.3	19500.1		1269.3	15336.6		1269.3	19460.8		1269.3	14938.6		1269.3	29812.2		1269.3	22634.2		1269.3	10512.2		1269.3	27082.6		1269.3	24504.7		1269.3	15127.6		1269.3	19162.4		1269.3	9116.75		1269.3	21616.7		1269.3
1271.03	20665	1.12036		1271.03	18862.5		1271.03	10868.6		1271.03	19517.1		1271.03	15373.8		1271.03	19444.4		1271.03	14966.3		1271.03	29782.9		1271.03	22663.9		1271.03	10548.6		1271.03	27087.1		1271.03	24526.4		1271.03	15118.8		1271.03	19186.6		1271.03	9122.87		1271.03	21603.4		1271.03
1272.76	20713.6	1.123		1272.76	18887.8		1272.76	10935.8		1272.76	19554.6		1272.76	15420.3		1272.76	19471.5		1272.76	14956.9		1272.76	29870.5		1272.76	22645.4		1272.76	10562.5		1272.76	27170.2		1272.76	24528.7		1272.76	15162.2		1272.76	19161.4		1272.76	9177.48		1272.76	21629.7		1272.76
1274.49	20803.6	1.12787		1274.49	18922.1		1274.49	10935.3		1274.49	19582.3		1274.49	15385.3		1274.49	19542.5		1274.49	15038		1274.49	29865.4		1274.49	22804.6		1274.49	10586.7		1274.49	27227.1		1274.49	24490.1		1274.49	15168.8		1274.49	19133.3		1274.49	9146.92		1274.49	21660.5		1274.49
1276.22	20773.5	1.12624		1276.22	18867.5		1276.22	10966.4		1276.22	19635.3		1276.22	15512.4		1276.22	19556.1		1276.22	14993.8		1276.22	29920.9		1276.22	22664		1276.22	10612.1		1276.22	27258.3		1276.22	24567		1276.22	15184.7		1276.22	19162.1		1276.22	9159.39		1276.22	21707.5		1276.22
1277.94	20807.4	1.12808		1277.94	18920.3		1277.94	10975.2		1277.94	19726.7		1277.94	15441.9		1277.94	19594.1		1277.94	15044.4		1277.94	29904.8		1277.94	22832.6		1277.94	10574.6		1277.94	27285.9		1277.94	24640.9		1277.94	15216.5		1277.94	19206.3		1277.94	9188.17		1277.94	21719.4		1277.94
1279.67	20779.1	1.12654		1279.67	18917.5		1279.67	10955.9		1279.67	19685.7		1279.67	15479.5		1279.67	19561.5		1279.67	15036.5		1279.67	29960.4		1279.67	22759.7		1279.67	10583.8		1279.67	27282.1		1279.67	24680.3		1279.67	15216.2		1279.67	19288.2		1279.67	9151.42		1279.67	21760.1		1279.67
1281.4	20904.8	1.13336		1281.4	18976.8		1281.4	11018.9		1281.4	19678.5		1281.4	15539.5		1281.4	19613.7		1281.4	15104.1		1281.4	30055.4		1281.4	22881.7		1281.4	10639		1281.4	27372.8		1281.4	24685.9		1281.4	15250.4		1281.4	19279.3		1281.4	9225		1281.4	21745.7		1281.4
1283.13	20921.6	1.13427		1283.13	19064.8		1283.13	11040.3		1283.13	19815		1283.13	15557.2		1283.13	19671.4		1283.13	15171.6		1283.13	30101.2		1283.13	22897.6		1283.13	10641.6		1283.13	27442.4		1283.13	24773.4		1283.13	15297.3		1283.13	19259.5		1283.13	9247.78		1283.13	21900.6		1283.13
1284.85	20970.9	1.13694		1284.85	19082.3		1284.85	11037.5		1284.85	19849.9		1284.85	15528.7		1284.85	19715.7		1284.85	15132.6		1284.85	30123.7		1284.85	22924.4		1284.85	10685.4		1284.85	27466.3		1284.85	24755.6		1284.85	15310.2		1284.85	19362.7		1284.85	9279.23		1284.85	21867.2		1284.85
1286.58	20906	1.13342		1286.58	18987.3		1286.58	11044		1286.58	19823		1286.58	15562		1286.58	19672.9		1286.58	15091.2		1286.58	30131.2		1286.58	22950.1		1286.58	10687.2		1286.58	27430.7		1286.58	24775.9		1286.58	15265.6		1286.58	19360.4		1286.58	9229.62		1286.58	21909.9		1286.58
1288.3	20924.7	1.13444		1288.3	19101.2		1288.3	11070.4		1288.3	19852.5		1288.3	15598.3		1288.3	19719.5		1288.3	15135.7		1288.3	30104.2		1288.3	22946		1288.3	10740.4		1288.3	27446.1		1288.3	24813.2		1288.3	15323.9		1288.3	19355.7		1288.3	9233.6		1288.3	21928.1		1288.3
1290.03	20962.4	1.13648		1290.03	19092.3		1290.03	11076		1290.03	19781.5		1290.03	15586.1		1290.03	19764.7		1290.03	15172		1290.03	30128		1290.03	22977.3		1290.03	10675.7		1290.03	27507.7		1290.03	24807.7		1290.03	15333.1		1290.03	19425.6		1290.03	9216.05		1290.03	21905.9		1290.03
1291.76	21005.9	1.13884		1291.76	19171.5		1291.76	11126.1		1291.76	19892.1		1291.76	15643.4		1291.76	19792.6		1291.76	15230.1		1291.76	30133.4		1291.76	22995.7		1291.76	10703.5		1291.76	27484		1291.76	24850.9		1291.76	15325.4		1291.76	19433.3		1291.76	9268.89		1291.76	22014.4		1291.76
1293.48	21036.1	1.14048		1293.48	19171.3		1293.48	11082.8		1293.48	19909.3		1293.48	15708		1293.48	19801.8		1293.48	15233.8		1293.48	30285.3		1293.48	23121.5		1293.48	10716.8		1293.48	27568.5		1293.48	24942.5		1293.48	15423.6		1293.48	19464		1293.48	9304.53		1293.48	22050.6		1293.48
1295.2	21107.9	1.14437		1295.2	19220.8		1295.2	11175.8		1295.2	20000.2		1295.2	15680.2		1295.2	19892.2		1295.2	15274.1		1295.2	30341.9		1295.2	23121.8		1295.2	10755.1		1295.2	27678.9		1295.2	25021.5		1295.2	15391.3		1295.2	19519.6		1295.2	9312.17		1295.2	22056.4		1295.2
1296.93	21179.9	1.14827		1296.93	19196.9		1296.93	11182.2		1296.93	19952.7		1296.93	15696		1296.93	19856.1		1296.93	15267.5		1296.93	30353.2		1296.93	23115.8		1296.93	10768.6		1296.93	27652.5		1296.93	24964.2		1296.93	15426.9		1296.93	19513.4		1296.93	9318.03		1296.93	22070.3		1296.93
1298.65	21142.6	1.14625		1298.65	19287.1		1298.65	11175.6		1298.65	20035		1298.65	15693.4		1298.65	19878.2		1298.65	15340		1298.65	30358.8		1298.65	23160.2		1298.65	10804.7		1298.65	27700.8		1298.65	25049.8		1298.65	15476.3		1298.65	19602.1		1298.65	9344.24		1298.65	22162.2		1298.65
1300.38	21187.3	1.14867		1300.38	19344.1		1300.38	11189.8		1300.38	20049.8		1300.38	15750.3		1300.38	19977.2		1300.38	15313.4		1300.38	30418.7		1300.38	23294		1300.38	10821.4		1300.38	27819.9		1300.38	25137		1300.38	15494.4		1300.38	19618.3		1300.38	9372.78		1300.38	22143.6		1300.38
1302.1	21293	1.15441		1302.1	19358.8		1302.1	11237.5		1302.1	20126.1		1302.1	15799.6		1302.1	20014.6		1302.1	15386.6		1302.1	30537		1302.1	23225.8		1302.1	10875.4		1302.1	27899.9		1302.1	25169.5		1302.1	15514		1302.1	19580.6		1302.1	9408.51		1302.1	22245.2		1302.1
1303.82	21275.9	1.15348		1303.82	19417.6		1303.82	11263.6		1303.82	20078.1		1303.82	15842.7		1303.82	19989.1		1303.82	15375.8		1303.82	30543.9		1303.82	23334.8		1303.82	10885		1303.82	27858.3		1303.82	25216.6		1303.82	15573.3		1303.82	19672.6		1303.82	9372.86		1303.82	22265.3		1303.82
1305.55	21319.6	1.15585		1305.55	19360.6		1305.55	11288.3		1305.55	20196.8		1305.55	15843.6		1305.55	20089.6		1305.55	15427.7		1305.55	30601.3		1305.55	23435.4		1305.55	10876		1305.55	27928.6		1305.55	25240.8		1305.55	15562.1		1305.55	19675.2		1305.55	9422.89		1305.55	22275.5		1305.55
1307.27	21413.9	1.16096		1307.27	19481.2		1307.27	11314.8		1307.27	20269.2		1307.27	15884.8		1307.27	20088.7		1307.27	15469.9		1307.27	30675.2		1307.27	23451.7		1307.27	10899.6		1307.27	28008.6		1307.27	25270.9		1307.27	15638.3		1307.27	19720.4		1307.27	9383.7		1307.27	22343		1307.27
1308.99	21406.2	1.16054		1308.99	19441.6		1308.99	11296		1308.99	20239.1		1308.99	15912.3		1308.99	20104		1308.99	15492		1308.99	30638.8		1308.99	23423.6		1308.99	10892.3		1308.99	28030.6		1308.99	25295.7		1308.99	15622.5		1308.99	19735.2		1308.99	9432.99		1308.99	22402.9		1308.99
1310.71	21445.9	1.1627		1310.71	19556.2		1310.71	11334.7		1310.71	20257.5		1310.71	15905.6		1310.71	20159.3		1310.71	15504.4		1310.71	30720.7		1310.71	23467.5		1310.71	10934.6		1310.71	28095		1310.71	25305.2		1310.71	15664.8		1310.71	19785.4		1310.71	9467.1		1310.71	22452		1310.71
1312.43	21439.6	1.16236		1312.43	19533.1		1312.43	11347.3		1312.43	20315		1312.43	15980.9		1312.43	20228.8		1312.43	15526.8		1312.43	30810.5		1312.43	23602.9		1312.43	10961.8		1312.43	28074.7		1312.43	25406.2		1312.43	15724.8		1312.43	19806.2		1312.43	9470.18		1312.43	22471.1		1312.43
1314.15	21443.8	1.16258		1314.15	19541.7		1314.15	11342.4		1314.15	20292.9		1314.15	15904.3		1314.15	20171.5		1314.15	15547.7		1314.15	30687.4		1314.15	23544.8		1314.15	10972.5		1314.15	28143.2		1314.15	25362.3		1314.15	15673.5		1314.15	19744.6		1314.15	9462.73		1314.15	22409.7		1314.15
1315.87	21493.8	1.16529		1315.87	19580.1		1315.87	11377.2		1315.87	20384.6		1315.87	15978.3		1315.87	20260.6		1315.87	15579.2		1315.87	30754.4		1315.87	23535.5		1315.87	10934.8		1315.87	28174.2		1315.87	25411.6		1315.87	15748.7		1315.87	19837.7		1315.87	9505.13		1315.87	22559.3		1315.87
1317.59	21532.3	1.16738		1317.59	19569.9		1317.59	11373.3		1317.59	20345		1317.59	16024.6		1317.59	20249.5		1317.59	15548.2		1317.59	30832.7		1317.59	23628.6		1317.59	11044		1317.59	28162.2		1317.59	25454.6		1317.59	15767.1		1317.59	19840.5		1317.59	9488.39		1317.59	22543		1317.59
1319.31	21592.6	1.17065		1319.31	19601.4		1319.31	11415.2		1319.31	20404.5		1319.31	15948.2		1319.31	20296.3		1319.31	15607		1319.31	30837.6		1319.31	23702.3		1319.31	10987.4		1319.31	28237.9		1319.31	25474.1		1319.31	15734		1319.31	19918.5		1319.31	9526.04		1319.31	22566.7		1319.31
1321.03	21558.8	1.16882		1321.03	19613.7		1321.03	11425.7		1321.03	20386.3		1321.03	16018.3		1321.03	20303.3		1321.03	15621.7		1321.03	30854.9		1321.03	23674.6		1321.03	11005.3		1321.03	28280.1		1321.03	25495.6		1321.03	15786.4		1321.03	19898.1		1321.03	9524.72		1321.03	22524.6		1321.03
1322.75	21645.3	1.17351		1322.75	19711.3		1322.75	11434.2		1322.75	20448		1322.75	16100.5		1322.75	20362.4		1322.75	15618.6		1322.75	30905.8		1322.75	23732.3		1322.75	11022.2		1322.75	28367.4		1322.75	25530.8		1322.75	15844.9		1322.75	19972.6		1322.75	9505.75		1322.75	22660.9		1322.75
1324.47	21574.1	1.16964		1324.47	19715.8		1324.47	11454.3		1324.47	20437.9		1324.47	16044.4		1324.47	20339.7		1324.47	15693.2		1324.47	30917.3		1324.47	23683.1		1324.47	11073.9		1324.47	28335.9		1324.47	25616		1324.47	15802.3		1324.47	19968		1324.47	9531.17		1324.47	22597.1		1324.47
1326.19	21719.6	1.17753		1326.19	19793.5		1326.19	11451.8		1326.19	20558.1		1326.19	16050.5		1326.19	20472.9		1326.19	15690.3		1326.19	30985.3		1326.19	23771.5		1326.19	11036.5		1326.19	28450.1		1326.19	25653.9		1326.19	15826.9		1326.19	19993.2		1326.19	9548.35		1326.19	22763.2		1326.19
1327.91	21741.9	1.17875		1327.91	19779.6		1327.91	11472.6		1327.91	20560.2		1327.91	16096.5		1327.91	20369.7		1327.91	15716.6		1327.91	30973.4		1327.91	23726.6		1327.91	11080.8		1327.91	28429.1		1327.91	25596.1		1327.91	15890		1327.91	20043.1		1327.91	9576.73		1327.91	22674.6		1327.91
1329.63	21753.7	1.17938		1329.63	19774.8		1329.63	11488.8		1329.63	20593.8		1329.63	16128.8		1329.63	20537.5		1329.63	15728.1		1329.63	30971.5		1329.63	23885.4		1329.63	11087		1329.63	28528.1		1329.63	25685		1329.63	15917		1329.63	20028.6		1329.63	9573.33		1329.63	22772.4		1329.63
1331.34	21754.8	1.17944		1331.34	19778.7		1331.34	11536.1		1331.34	20555.8		1331.34	16162.8		1331.34	20514.8		1331.34	15722.4		1331.34	31021.1		1331.34	23811.5		1331.34	11119.8		1331.34	28409.8		1331.34	25735.1		1331.34	15912.5		1331.34	20075.9		1331.34	9609.69		1331.34	22782.1		1331.34
1333.06	21698.4	1.17638		1333.06	19754		1333.06	11496.6		1333.06	20619.6		1333.06	16133.4		1333.06	20517.1		1333.06	15767.8		1333.06	31023.3		1333.06	23826.8		1333.06	11159.5		1333.06	28466.1		1333.06	25716.4		1333.06	15988.1		1333.06	20081.4		1333.06	9588		1333.06	22796.7		1333.06
1334.78	21848.5	1.18452		1334.78	19912.6		1334.78	11525.9		1334.78	20650.6		1334.78	16185.1		1334.78	20579.6		1334.78	15741.9		1334.78	31090.1		1334.78	23896.7		1334.78	11149.7		1334.78	28457.7		1334.78	25712.4		1334.78	15954.2		1334.78	20072.2		1334.78	9604.87		1334.78	22829.5		1334.78
1336.49	21861.5	1.18523		1336.49	19914.8		1336.49	11597.4		1336.49	20678.4		1336.49	16197.9		1336.49	20580.5		1336.49	15807.3		1336.49	31163.2		1336.49	23920.2		1336.49	11126.4		1336.49	28616.4		1336.49	25763.2		1336.49	15970.5		1336.49	20127.8		1336.49	9644.44		1336.49	22856.4		1336.49
1338.21	21891.9	1.18688		1338.21	19921.8		1338.21	11626.3		1338.21	20689.3		1338.21	16205.3		1338.21	20559.7		1338.21	15824.7		1338.21	31156.9		1338.21	24060.4		1338.21	11216.9		1338.21	28541.8		1338.21	25857.6		1338.21	16049.8		1338.21	20134		1338.21	9634.34		1338.21	22893.1		1338.21
1339.92	21888.2	1.18668		1339.92	19895.7		1339.92	11583.3		1339.92	20729.5		1339.92	16269.9		1339.92	20615.9		1339.92	15874.5		1339.92	31167.2		1339.92	23973.4		1339.92	11183.1		1339.92	28679.4		1339.92	25848.3		1339.92	16000.2		1339.92	20187.8		1339.92	9646.54		1339.92	22952.3		1339.92
1341.64	21852.8	1.18475		1341.64	19961.1		1341.64	11602.5		1341.64	20798.4		1341.64	16288.8		1341.64	20692		1341.64	15921.3		1341.64	31229.4		1341.64	24110.2		1341.64	11201.5		1341.64	28660.3		1341.64	25875.4		1341.64	16065.2		1341.64	20252.3		1341.64	9631.55		1341.64	23039.8		1341.64
1343.35	21901.3	1.18738		1343.35	20036.2		1343.35	11637.1		1343.35	20810.5		1343.35	16360.2		1343.35	20694.7		1343.35	15897.2		1343.35	31229.7		1343.35	24078.6		1343.35	11216.8		1343.35	28802.2		1343.35	25911.7		1343.35	16096.6		1343.35	20253.4		1343.35	9692.47		1343.35	23005		1343.35
1345.07	22054.8	1.19571		1345.07	20030		1345.07	11635.2		1345.07	20841.1		1345.07	16354		1345.07	20711.2		1345.07	15952		1345.07	31288.7		1345.07	24109.9		1345.07	11234.4		1345.07	28761.7		1345.07	25967.6		1345.07	16058.2		1345.07	20246.9		1345.07	9682.51		1345.07	23030.1		1345.07
1346.78	22051.7	1.19554		1346.78	20058.9		1346.78	11661.1		1346.78	20876.3		1346.78	16414.9		1346.78	20747.4		1346.78	15909.3		1346.78	31331.6		1346.78	24063.8		1346.78	11243.9		1346.78	28814.5		1346.78	25987.2		1346.78	16106.3		1346.78	20284.1		1346.78	9707.87		1346.78	23094		1346.78
1348.5	22025.5	1.19412		1348.5	20064.1		1348.5	11677.1		1348.5	20902.9		1348.5	16333.7		1348.5	20722		1348.5	15935.4		1348.5	31330.2		1348.5	24127.2		1348.5	11288.7		1348.5	28756.3		1348.5	25988.5		1348.5	16136.5		1348.5	20245.1		1348.5	9706.48		1348.5	23054.4		1348.5
1350.21	22066	1.19632		1350.21	20111.2		1350.21	11686.5		1350.21	20950.9		1350.21	16459		1350.21	20780.9		1350.21	15994.8		1350.21	31368.4		1350.21	24103.6		1350.21	11286.1		1350.21	28850.4		1350.21	26033.7		1350.21	16170.1		1350.21	20323.9		1350.21	9710.69		1350.21	23156.1		1350.21
1351.92	22080.4	1.1971		1351.92	20043.3		1351.92	11718.7		1351.92	20965.1		1351.92	16369.6		1351.92	20814.5		1351.92	16005.4		1351.92	31373.6		1351.92	24165.5		1351.92	11305.7		1351.92	28839.6		1351.92	26081.1		1351.92	16189.7		1351.92	20380.2		1351.92	9715.97		1351.92	23150.9		1351.92
1353.64	22066.8	1.19636		1353.64	20154.4		1353.64	11709.3		1353.64	20938		1353.64	16388.5		1353.64	20799.5		1353.64	16001.1		1353.64	31346.3		1353.64	24145		1353.64	11265.5		1353.64	28894.1		1353.64	26040.7		1353.64	16186		1353.64	20305.6		1353.64	9743.64		1353.64	23136.2		1353.64
1355.35	22096.7	1.19798		1355.35	20180.9		1355.35	11679.6		1355.35	20965.4		1355.35	16444.3		1355.35	20840.9		1355.35	16006.2		1355.35	31447.7		1355.35	24254.8		1355.35	11274		1355.35	28934.3		1355.35	26064.5		1355.35	16194.5		1355.35	20421.7		1355.35	9741.73		1355.35	23198.1		1355.35
1357.06	22190.5	1.20306		1357.06	20182.6		1357.06	11725.7		1357.06	21007.8		1357.06	16490		1357.06	20939.3		1357.06	16060.5		1357.06	31448.9		1357.06	24246.8		1357.06	11322.7		1357.06	29014		1357.06	26180.1		1357.06	16236.6		1357.06	20456.5		1357.06	9754.95		1357.06	23225.2		1357.06
1358.77	22222.7	1.20481		1358.77	20248.9		1358.77	11813.8		1358.77	21104.5		1358.77	16460.9		1358.77	20923.3		1358.77	16097.6		1358.77	31494.2		1358.77	24341		1358.77	11375		1358.77	29070.3		1358.77	26162.1		1358.77	16272.7		1358.77	20467.6		1358.77	9811.71		1358.77	23266.1		1358.77
1360.48	22261	1.20689		1360.48	20255.2		1360.48	11820.4		1360.48	21114.9		1360.48	16484.6		1360.48	20944		1360.48	16117.3		1360.48	31462.3		1360.48	24387.3		1360.48	11408.7		1360.48	29061.2		1360.48	26238.5		1360.48	16274.3		1360.48	20545.8		1360.48	9826.1		1360.48	23361.3		1360.48
1362.2	22259.9	1.20683		1362.2	20354.5		1362.2	11824.4		1362.2	21110.5		1362.2	16544.4		1362.2	20987.8		1362.2	16150.9		1362.2	31519		1362.2	24411.7		1362.2	11412.8		1362.2	29144.4		1362.2	26280.1		1362.2	16338.7		1362.2	20557.4		1362.2	9822.95		1362.2	23372.7		1362.2
1363.91	22274.6	1.20763		1363.91	20331.2		1363.91	11809.7		1363.91	21117.9		1363.91	16592.3		1363.91	21004.6		1363.91	16129.6		1363.91	31491.4		1363.91	24497.6		1363.91	11400.8		1363.91	29120.2		1363.91	26219.8		1363.91	16314.1		1363.91	20512.7		1363.91	9815.92		1363.91	23394.5		1363.91
1365.62	22281.3	1.20799		1365.62	20357.5		1365.62	11826.3		1365.62	21123.7		1365.62	16490.7		1365.62	20959		1365.62	16138		1365.62	31520.9		1365.62	24514.8		1365.62	11384.4		1365.62	29120.2		1365.62	26265.6		1365.62	16318.1		1365.62	20608.4		1365.62	9819.79		1365.62	23384.2		1365.62
1367.33	22260.4	1.20686		1367.33	20341.1		1367.33	11846.2		1367.33	21205.2		1367.33	16618.5		1367.33	20998.8		1367.33	16128.9		1367.33	31498		1367.33	24491.5		1367.33	11423.1		1367.33	29116.8		1367.33	26312.3		1367.33	16329.7		1367.33	20580.5		1367.33	9804.82		1367.33	23435.5		1367.33
1369.04	22318.2	1.20999		1369.04	20369.6		1369.04	11869.8		1369.04	21150.2		1369.04	16643.9		1369.04	21064.9		1369.04	16181.3		1369.04	31552.2		1369.04	24523		1369.04	11457.6		1369.04	29172.4		1369.04	26350.5		1369.04	16341.8		1369.04	20548.9		1369.04	9847.45		1369.04	23444.5		1369.04
1370.75	22316.9	1.20992		1370.75	20431.3		1370.75	11843.3		1370.75	21266.3		1370.75	16648.9		1370.75	21056.4		1370.75	16203.1		1370.75	31593.3		1370.75	24552.7		1370.75	11462.8		1370.75	29270.4		1370.75	26395.9		1370.75	16354.8		1370.75	20605.7		1370.75	9873.56		1370.75	23504.7		1370.75
1372.46	22427.9	1.21594		1372.46	20456.1		1372.46	11892.2		1372.46	21309.2		1372.46	16666.5		1372.46	21101.6		1372.46	16257.9		1372.46	31548.3		1372.46	24617.4		1372.46	11478.3		1372.46	29180.4		1372.46	26423.2		1372.46	16442.2		1372.46	20694.7		1372.46	9909.3		1372.46	23535.8		1372.46
1374.16	22431.7	1.21614		1374.16	20443.5		1374.16	11896		1374.16	21337.1		1374.16	16689.1		1374.16	21139.2		1374.16	16258.8		1374.16	31567.2		1374.16	24583.9		1374.16	11506.6		1374.16	29324.9		1374.16	26426.4		1374.16	16475		1374.16	20693.6		1374.16	9918.07		1374.16	23565.3		1374.16
1375.88	22450.4	1.21715		1375.88	20432.2		1375.88	11922.8		1375.88	21345.5		1375.88	16674.5		1375.88	21194.1		1375.88	16268.3		1375.88	31591.4		1375.88	24595.1		1375.88	11478.5		1375.88	29340		1375.88	26451.4		1375.88	16444		1375.88	20737.4		1375.88	9870.75		1375.88	23557.8		1375.88
1377.58	22544.4	1.22225		1377.58	20561.7		1377.58	11902.8		1377.58	21394		1377.58	16762.1		1377.58	21209.4		1377.58	16311.4		1377.58	31597.5		1377.58	24714.7		1377.58	11509.3		1377.58	29385.1		1377.58	26560.1		1377.58	16504.2		1377.58	20740.6		1377.58	9930		1377.58	23631.5		1377.58
1379.29	22585.9	1.2245		1379.29	20548.6		1379.29	11966		1379.29	21421		1379.29	16767.4		1379.29	21262.9		1379.29	16362.3		1379.29	31620.4		1379.29	24793		1379.29	11531.4		1379.29	29495		1379.29	26589.2		1379.29	16533.7		1379.29	20728.1		1379.29	9918.7		1379.29	23716.1		1379.29
1381	22580.5	1.22421		1381	20558.4		1381	11952.6		1381	21435.8		1381	16722.6		1381	21221.9		1381	16342.4		1381	31620.5		1381	24730.8		1381	11526.1		1381	29529.3		1381	26565.2		1381	16492.8		1381	20710.6		1381	9938.76		1381	23697.4		1381
1382.7	22654.3	1.22821		1382.7	20612.5		1382.7	12009.4		1382.7	21498.2		1382.7	16838.7		1382.7	21257.7		1382.7	16407		1382.7	31591.4		1382.7	24806.4		1382.7	11598.3		1382.7	29622.7		1382.7	26626.2		1382.7	16565.9		1382.7	20881.3		1382.7	9936.62		1382.7	23729.4		1382.7
1384.41	22587.6	1.22459		1384.41	20631.9		1384.41	12011		1384.41	21476.9		1384.41	16799.6		1384.41	21295.1		1384.41	16378.9		1384.41	31601.3		1384.41	24738		1384.41	11581.3		1384.41	29547.8		1384.41	26684.3		1384.41	16527.6		1384.41	20864.3		1384.41	9954.01		1384.41	23746.1		1384.41
1386.12	22576.2	1.22398		1386.12	20607.7		1386.12	12006.3		1386.12	21458.1		1386.12	16784.4		1386.12	21246		1386.12	16371.4		1386.12	31644.5		1386.12	24806.4		1386.12	11547.9		1386.12	29586.3		1386.12	26641.7		1386.12	16506.3		1386.12	20823.6		1386.12	9967.38		1386.12	23744.9		1386.12
1387.82	22685.2	1.22988		1387.82	20675.2		1387.82	12031.4		1387.82	21529		1387.82	16807.1		1387.82	21337.3		1387.82	16438.4		1387.82	31647.6		1387.82	24886.3		1387.82	11584.1		1387.82	29654.2		1387.82	26640.4		1387.82	16574		1387.82	20876.8		1387.82	10008.4		1387.82	23789.3		1387.82
1389.53	22732.8	1.23247		1389.53	20728.6		1389.53	12013.3		1389.53	21543.8		1389.53	16903.1		1389.53	21392.2		1389.53	16468.3		1389.53	31640.7		1389.53	24915.7		1389.53	11635.6		1389.53	29705.9		1389.53	26700.5		1389.53	16578.3		1389.53	20963		1389.53	10010.8		1389.53	23828.8		1389.53
1391.24	22762.2	1.23406		1391.24	20748.1		1391.24	12020		1391.24	21581.8		1391.24	16896		1391.24	21381.7		1391.24	16460.5		1391.24	31649.9		1391.24	24900.5		1391.24	11659.3		1391.24	29714		1391.24	26742.4		1391.24	16627.6		1391.24	20933.4		1391.24	10011.2		1391.24	23880.2		1391.24
1392.94	22697.8	1.23057		1392.94	20736.2		1392.94	12067.1		1392.94	21619.1		1392.94	16820.5		1392.94	21429.5		1392.94	16493.5		1392.94	31642.4		1392.94	24970.4		1392.94	11678		1392.94	29766.3		1392.94	26748.1		1392.94	16667		1392.94	20992		1392.94	10020.4		1392.94	23881		1392.94
1394.65	22795.1	1.23584		1394.65	20766.9		1394.65	12052.2		1394.65	21634.9		1394.65	16868		1394.65	21446.1		1394.65	16532.9		1394.65	31649.9		1394.65	24991.8		1394.65	11663.1		1394.65	29804.9		1394.65	26790.9		1394.65	16668.2		1394.65	20976.3		1394.65	10061.7		1394.65	23898.6		1394.65
1396.35	22792.5	1.2357		1396.35	20786		1396.35	12077.3		1396.35	21647.4		1396.35	16927.1		1396.35	21475.7		1396.35	16575.6		1396.35	31649.9		1396.35	24958.1		1396.35	11661.3		1396.35	29853.8		1396.35	26885.4		1396.35	16680.4		1396.35	21068.3		1396.35	10057.8		1396.35	23929.8		1396.35
1398.05	22822	1.2373		1398.05	20756.6		1398.05	12094.3		1398.05	21598.9		1398.05	16947.9		1398.05	21461.7		1398.05	16504.4		1398.05	31649.9		1398.05	24970.6		1398.05	11654		1398.05	29780.5		1398.05	26841.3		1398.05	16696.1		1398.05	21016.6		1398.05	10031.2		1398.05	23929.3		1398.05
1399.76	22752.8	1.23355		1399.76	20803.9		1399.76	12024.6		1399.76	21656.8		1399.76	16979.4		1399.76	21445.4		1399.76	16515.2		1399.76	31649.9		1399.76	24911.4		1399.76	11702.7		1399.76	29831.9		1399.76	26844.9		1399.76	16647.2		1399.76	20967.5		1399.76	10040.9		1399.76	23907.2		1399.76
1401.46	22828	1.23762		1401.46	20827		1401.46	12062.6		1401.46	21712.9		1401.46	16940.1		1401.46	21481.8		1401.46	16521.1		1401.46	31649.9		1401.46	25043.7		1401.46	11726.4		1401.46	29845.1		1401.46	26961.7		1401.46	16684.7		1401.46	21104.8		1401.46	10042		1401.46	23947.4		1401.46
1403.16	22886.8	1.24081		1403.16	20847		1403.16	12109.1		1403.16	21686.9		1403.16	16936.1		1403.16	21504.8		1403.16	16568.5		1403.16	31645.1		1403.16	24946.4		1403.16	11711.6		1403.16	29808.4		1403.16	26924.8		1403.16	16678.5		1403.16	21012.8		1403.16	10068.5		1403.16	23953.1		1403.16
1404.87	22832.9	1.23789		1404.87	20866.8		1404.87	12079.9		1404.87	21702.5		1404.87	16950.4		1404.87	21511.2		1404.87	16573.6		1404.87	31649.9		1404.87	25036.3		1404.87	11712.4		1404.87	29890.2		1404.87	26947.6		1404.87	16718.5		1404.87	21072.8		1404.87	10072.2		1404.87	23973.2		1404.87
1406.57	22872	1.24001		1406.57	20852.3		1406.57	12087.3		1406.57	21751.4		1406.57	16939.1		1406.57	21470.7		1406.57	16616.4		1406.57	31649.9		1406.57	25078.5		1406.57	11729		1406.57	29949.7		1406.57	26957.4		1406.57	16732		1406.57	21104.2		1406.57	10072.9		1406.57	23971.3		1406.57
1408.27	22866.3	1.2397		1408.27	20951.2		1408.27	12140.8		1408.27	21804.8		1408.27	17006.3		1408.27	21610.8		1408.27	16629.6		1408.27	31649.9		1408.27	25124.3		1408.27	11733		1408.27	29990.1		1408.27	27067.5		1408.27	16766		1408.27	21130.4		1408.27	10098.7		1408.27	24083.8		1408.27
1409.97	22932.8	1.24331		1409.97	21021.6		1409.97	12122.1		1409.97	21797.2		1409.97	17019.6		1409.97	21604.3		1409.97	16646.8		1409.97	31649.9		1409.97	25151		1409.97	11747.6		1409.97	30004.7		1409.97	27086.2		1409.97	16706.8		1409.97	21159.5		1409.97	10122.6		1409.97	24035.5		1409.97
1411.68	22966.9	1.24516		1411.68	21006.8		1411.68	12151.6		1411.68	21809.4		1411.68	16995.2		1411.68	21589.8		1411.68	16619.3		1411.68	31649.9		1411.68	25244.5		1411.68	11765.5		1411.68	30027.8		1411.68	27051.2		1411.68	16793.6		1411.68	21142		1411.68	10105.7		1411.68	24069		1411.68
1413.38	22970.8	1.24537		1413.38	20975.9		1413.38	12145.7		1413.38	21859.6		1413.38	17024.8		1413.38	21645.5		1413.38	16651.3		1413.38	31649.9		1413.38	25269.3		1413.38	11764.3		1413.38	30009.1		1413.38	27087.7		1413.38	16744.5		1413.38	21204.3		1413.38	10121.2		1413.38	24123.3		1413.38
1415.08	22976.5	1.24568		1415.08	21021.6		1415.08	12134.9		1415.08	21853.9		1415.08	16998.8		1415.08	21683.4		1415.08	16689.6		1415.08	31649.9		1415.08	25205.6		1415.08	11794.4		1415.08	30105.2		1415.08	27127.5		1415.08	16760.6		1415.08	21179.5		1415.08	10141.3		1415.08	24153.3		1415.08
1416.78	23047.4	1.24952		1416.78	21043		1416.78	12176.4		1416.78	21880.9		1416.78	17037.3		1416.78	21723.8		1416.78	16719.9		1416.78	31649.9		1416.78	25259		1416.78	11763.4		1416.78	30155.8		1416.78	27159.8		1416.78	16800.4		1416.78	21220.4		1416.78	10136.9		1416.78	24201.9		1416.78
1418.48	23073.8	1.25095		1418.48	21043.5		1418.48	12191.4		1418.48	21896.3		1418.48	17066		1418.48	21685.8		1418.48	16711.7		1418.48	31649.9		1418.48	25255.5		1418.48	11791.2		1418.48	30075.2		1418.48	27223.7		1418.48	16796.9		1418.48	21290.9		1418.48	10154.6		1418.48	24179.4		1418.48
1420.18	23095.9	1.25215		1420.18	21097.3		1420.18	12174.7		1420.18	21897.4		1420.18	17048.3		1420.18	21699		1420.18	16664.7		1420.18	31649.9		1420.18	25246.1		1420.18	11802.6		1420.18	30145		1420.18	27195.2		1420.18	16831.6		1420.18	21300.1		1420.18	10132.1		1420.18	24192.1		1420.18
1421.88	23097.5	1.25224		1421.88	21055.3		1421.88	12198.3		1421.88	21948.9		1421.88	17116.1		1421.88	21768.7		1421.88	16775.6		1421.88	31649.9		1421.88	25353.8		1421.88	11783.7		1421.88	30264.8		1421.88	27187.6		1421.88	16843.9		1421.88	21303.3		1421.88	10173.1		1421.88	24235.8		1421.88
1423.58	23124.9	1.25372		1423.58	21097.6		1423.58	12209.5		1423.58	21986.5		1423.58	17155.6		1423.58	21824		1423.58	16742.3		1423.58	31649.9		1423.58	25412.2		1423.58	11829.9		1423.58	30230.1		1423.58	27345.8		1423.58	16859.9		1423.58	21291.7		1423.58	10154.9		1423.58	24242.3		1423.58
1425.28	23156.2	1.25542		1425.28	21133.7		1425.28	12211.4		1425.28	22016.1		1425.28	17186.5		1425.28	21832.5		1425.28	16801.8		1425.28	31649.9		1425.28	25394.6		1425.28	11846.7		1425.28	30242.4		1425.28	27284.3		1425.28	16837.7		1425.28	21368.9		1425.28	10218.8		1425.28	24262		1425.28
1426.97	23223.5	1.25907		1426.97	21226.8		1426.97	12285.6		1426.97	22054.6		1426.97	17171.2		1426.97	21826.2		1426.97	16810		1426.97	31649.9		1426.97	25453.3		1426.97	11847.1		1426.97	30271		1426.97	27354.9		1426.97	16848.1		1426.97	21443.8		1426.97	10207		1426.97	24356.5		1426.97
1428.67	23186.9	1.25709		1428.67	21174		1428.67	12224.6		1428.67	22067.6		1428.67	17183.7		1428.67	21847.3		1428.67	16789.2		1428.67	31649.9		1428.67	25479.1		1428.67	11892.6		1428.67	30314.1		1428.67	27340.5		1428.67	16895.5		1428.67	21407.8		1428.67	10237.2		1428.67	24383.8		1428.67
1430.37	23219.3	1.25884		1430.37	21231.4		1430.37	12291.1		1430.37	22038.3		1430.37	17260		1430.37	21842.7		1430.37	16871.4		1430.37	31649.9		1430.37	25482		1430.37	11896.3		1430.37	30393.1		1430.37	27379.9		1430.37	16920.1		1430.37	21375.2		1430.37	10229.8		1430.37	24387.4		1430.37
1432.07	23290.9	1.26272		1432.07	21250.2		1432.07	12289.2		1432.07	22069.8		1432.07	17234		1432.07	21950.5		1432.07	16910.8		1432.07	31649.9		1432.07	25477.8		1432.07	11903.4		1432.07	30405.2		1432.07	27476.2		1432.07	16900.3		1432.07	21454.6		1432.07	10250		1432.07	24400.7		1432.07
1433.76	23364.1	1.26669		1433.76	21286.7		1433.76	12302.8		1433.76	22126		1433.76	17158.1		1433.76	21919.2		1433.76	16911.9		1433.76	31649.9		1433.76	25509.1		1433.76	11890.1		1433.76	30441.8		1433.76	27504.5		1433.76	16914.8		1433.76	21468.1		1433.76	10257.7		1433.76	24456.3		1433.76
1435.46	23278.8	1.26207		1435.46	21317.3		1435.46	12285.1		1435.46	22130.3		1435.46	17269		1435.46	21942.1		1435.46	16890		1435.46	31649.9		1435.46	25509.3		1435.46	11908.2		1435.46	30390.3		1435.46	27434.5		1435.46	16973		1435.46	21491		1435.46	10280.1		1435.46	24513.7		1435.46
1437.16	23381.5	1.26764		1437.16	21317.9		1437.16	12295.3		1437.16	22135		1437.16	17250.8		1437.16	21930.6		1437.16	16938.2		1437.16	31649.9		1437.16	25568		1437.16	11927.5		1437.16	30473.4		1437.16	27472.6		1437.16	17008.4		1437.16	21482.4		1437.16	10267.2		1437.16	24522.9		1437.16
1438.85	23428	1.27016		1438.85	21360.7		1438.85	12324.8		1438.85	22201.1		1438.85	17235.1		1438.85	21989.6		1438.85	16915.6		1438.85	31649.9		1438.85	25539.9		1438.85	11933.3		1438.85	30458.5		1438.85	27509.1		1438.85	17011.3		1438.85	21539.7		1438.85	10286.8		1438.85	24475		1438.85
1440.55	23299.8	1.2632		1440.55	21336.5		1440.55	12308.3		1440.55	22204.4		1440.55	17299.5		1440.55	21977.8		1440.55	16970.8		1440.55	31649.9		1440.55	25644.6		1440.55	11933.5		1440.55	30511		1440.55	27601.8		1440.55	16989.8		1440.55	21536.2		1440.55	10298.6		1440.55	24546.9		1440.55
1442.24	23397.2	1.26849		1442.24	21355.9		1442.24	12333.1		1442.24	22252.1		1442.24	17322.6		1442.24	22014		1442.24	16992.8		1442.24	31649.9		1442.24	25592.1		1442.24	11971.9		1442.24	30530.6		1442.24	27644.1		1442.24	16986.2		1442.24	21573.8		1442.24	10284.2		1442.24	24531.6		1442.24
1443.94	23399.4	1.26861		1443.94	21364		1443.94	12345.6		1443.94	22265.8		1443.94	17293.6		1443.94	22022.2		1443.94	16920.8		1443.94	31649.9		1443.94	25616.7		1443.94	11936.1		1443.94	30588.2		1443.94	27578.1		1443.94	17014.3		1443.94	21559.9		1443.94	10307.4		1443.94	24586.4		1443.94
1445.63	23402	1.26874		1445.63	21399.4		1445.63	12284.6		1445.63	22235.8		1445.63	17364.9		1445.63	22005.2		1445.63	16932.3		1445.63	31649.9		1445.63	25732.6		1445.63	11939.1		1445.63	30526.6		1445.63	27629.8		1445.63	17032.7		1445.63	21607.2		1445.63	10317.3		1445.63	24610.8		1445.63
1447.33	23428.2	1.27017		1447.33	21373.7		1447.33	12350.6		1447.33	22263.6		1447.33	17331.1		1447.33	22025.7		1447.33	16980.3		1447.33	31649.9		1447.33	25664.1		1447.33	11995.4		1447.33	30590.3		1447.33	27646.1		1447.33	17051.1		1447.33	21651.5		1447.33	10310.2		1447.33	24544		1447.33
1449.02	23471.6	1.27252		1449.02	21477.1		1449.02	12375.5		1449.02	22283.5		1449.02	17368.2		1449.02	22090.6		1449.02	17010.6		1449.02	31649.9		1449.02	25704.5		1449.02	11986.6		1449.02	30670.1		1449.02	27615.6		1449.02	17116.3		1449.02	21686.4		1449.02	10356.1		1449.02	24629.3		1449.02
1450.72	23507.1	1.27444		1450.72	21435.2		1450.72	12385.5		1450.72	22339.8		1450.72	17415.9		1450.72	22098.2		1450.72	17047.9		1450.72	31649.9		1450.72	25627		1450.72	12028.8		1450.72	30628.3		1450.72	27751.4		1450.72	17122.3		1450.72	21686.5		1450.72	10347.7		1450.72	24667.8		1450.72
1452.41	23446.1	1.27114		1452.41	21448.1		1452.41	12364.5		1452.41	22310.5		1452.41	17382.1		1452.41	22079.5		1452.41	16997.7		1452.41	31649.9		1452.41	25701.5		1452.41	11974.2		1452.41	30627.7		1452.41	27674.9		1452.41	17104.6		1452.41	21651.6		1452.41	10292.5		1452.41	24687.5		1452.41
1454.1	23468	1.27233		1454.1	21528.9		1454.1	12363.2		1454.1	22375.8		1454.1	17371		1454.1	22142.4		1454.1	17076.7		1454.1	31649.9		1454.1	25766.6		1454.1	12026.9		1454.1	30683.5		1454.1	27695.5		1454.1	17146.6		1454.1	21682.6		1454.1	10344.2		1454.1	24627.4		1454.1
1455.79	23596.6	1.2793		1455.79	21578.2		1455.79	12397.1		1455.79	22424.4		1455.79	17450.1		1455.79	22152.4		1455.79	17044.7		1455.79	31649.9		1455.79	25744		1455.79	12071.7		1455.79	30741.2		1455.79	27750.2		1455.79	17176.9		1455.79	21730		1455.79	10343.5		1455.79	24709.9		1455.79
1457.49	23560.8	1.27735		1457.49	21584.6		1457.49	12418.8		1457.49	22396.9		1457.49	17494.6		1457.49	22120.5		1457.49	17113.6		1457.49	31649.9		1457.49	25879.7		1457.49	12010		1457.49	30680.2		1457.49	27751		1457.49	17161.2		1457.49	21727.7		1457.49	10370.8		1457.49	24734.5		1457.49
1459.18	23706.5	1.28526		1459.18	21613.2		1459.18	12468.4		1459.18	22469.6		1459.18	17509.1		1459.18	22122.5		1459.18	17120.7		1459.18	31649.9		1459.18	25873.8		1459.18	12109.3		1459.18	30743.2		1459.18	27887.3		1459.18	17180.5		1459.18	21730.5		1459.18	10396.6		1459.18	24801.6		1459.18
1460.87	23725.7	1.28629		1460.87	21621.9		1460.87	12440.6		1460.87	22458.5		1460.87	17550.3		1460.87	22243		1460.87	17210.4		1460.87	31649.9		1460.87	25917.7		1460.87	12100.9		1460.87	30840.9		1460.87	27862.6		1460.87	17128.4		1460.87	21835.5		1460.87	10395.7		1460.87	24865		1460.87
1462.56	23717.3	1.28584		1462.56	21682		1462.56	12425.5		1462.56	22524.7		1462.56	17494.4		1462.56	22260		1462.56	17225.2		1462.56	31649.9		1462.56	25971.8		1462.56	12064		1462.56	30837.2		1462.56	27923.9		1462.56	17231.4		1462.56	21838.7		1462.56	10396.6		1462.56	24885.7		1462.56
1464.25	23693.8	1.28457		1464.25	21687.8		1464.25	12446.6		1464.25	22445		1464.25	17542.7		1464.25	22314.7		1464.25	17276.4		1464.25	31649.9		1464.25	25941.6		1464.25	12102.7		1464.25	30850.6		1464.25	27968.7		1464.25	17232.9		1464.25	21880.7		1464.25	10412.4		1464.25	24881.4		1464.25
1465.94	23737.5	1.28693		1465.94	21732		1465.94	12484.2		1465.94	22555.6		1465.94	17563.3		1465.94	22311.8		1465.94	17207.2		1465.94	31649.9		1465.94	25954.2		1465.94	12099.2		1465.94	30846.1		1465.94	27965.3		1465.94	17231		1465.94	21829.1		1465.94	10440.4		1465.94	24900.9		1465.94
1467.63	23663.9	1.28294		1467.63	21623.4		1467.63	12472.4		1467.63	22434.2		1467.63	17470.8		1467.63	22260.5		1467.63	17246.6		1467.63	31649.9		1467.63	25961.2		1467.63	12134		1467.63	30833.2		1467.63	27915.7		1467.63	17218.8		1467.63	21804.5		1467.63	10408.1		1467.63	24838.3		1467.63
1469.32	23771.1	1.28875		1469.32	21693.2		1469.32	12442.5		1469.32	22544.7		1469.32	17535.2		1469.32	22307.1		1469.32	17135.2		1469.32	31649.9		1469.32	25933.9		1469.32	12116.1		1469.32	30909.5		1469.32	27885.8		1469.32	17249		1469.32	21826.3		1469.32	10414.4		1469.32	24891.9		1469.32
1471.01	23747.4	1.28747		1471.01	21650.8		1471.01	12460.4		1471.01	22586.3		1471.01	17514.9		1471.01	22309.9		1471.01	17179.1		1471.01	31649.9		1471.01	25970.6		1471.01	12131.3		1471.01	30896.2		1471.01	27963.2		1471.01	17239.4		1471.01	21858.5		1471.01	10438.3		1471.01	24900.4		1471.01
1472.7	23737.2	1.28692		1472.7	21719.6		1472.7	12502.7		1472.7	22611.3		1472.7	17499.9		1472.7	22390		1472.7	17190.8		1472.7	31649.9		1472.7	26058.8		1472.7	12147.8		1472.7	30877.1		1472.7	28019.8		1472.7	17263.6		1472.7	21870.4		1472.7	10434.6		1472.7	24885.2		1472.7
1474.39	23731.8	1.28663		1474.39	21807.3		1474.39	12487.1		1474.39	22616		1474.39	17540.7		1474.39	22319.9		1474.39	17229.9		1474.39	31649.9		1474.39	26058.3		1474.39	12161.5		1474.39	30947.1		1474.39	28030.7		1474.39	17255.7		1474.39	21897.1		1474.39	10458.4		1474.39	24963.6		1474.39
1476.08	23913.9	1.2965		1476.08	21786		1476.08	12525.7		1476.08	22657.4		1476.08	17644.9		1476.08	22451.8		1476.08	17253.2		1476.08	31649.9		1476.08	26137.8		1476.08	12207.7		1476.08	30965.8		1476.08	28146.6		1476.08	17329.1		1476.08	21977.6		1476.08	10495.3		1476.08	25024.2		1476.08
1477.77	23764	1.28837		1477.77	21795.7		1477.77	12475.6		1477.77	22672.9		1477.77	17569.4		1477.77	22366.5		1477.77	17247.9		1477.77	31649.9		1477.77	26087.4		1477.77	12180.3		1477.77	30971.6		1477.77	28066		1477.77	17298.1		1477.77	21979.7		1477.77	10479.8		1477.77	24969.5		1477.77
1479.46	23902	1.29586		1479.46	21767.7		1479.46	12535.8		1479.46	22674.9		1479.46	17665.9		1479.46	22464.6		1479.46	17268		1479.46	31649.9		1479.46	26126.4		1479.46	12202.5		1479.46	31064.2		1479.46	28156.2		1479.46	17369.3		1479.46	21991.3		1479.46	10493.2		1479.46	25049.5		1479.46
1481.14	23905.1	1.29602		1481.14	21727.4		1481.14	12498.5		1481.14	22651.7		1481.14	17592.6		1481.14	22471.3		1481.14	17303.8		1481.14	31649.9		1481.14	26056.2		1481.14	12221.2		1481.14	30999.5		1481.14	28153.1		1481.14	17321.9		1481.14	22005.6		1481.14	10490.8		1481.14	25060.7		1481.14
1482.83	23869.2	1.29408		1482.83	21836.3		1482.83	12542.2		1482.83	22687.2		1482.83	17643.2		1482.83	22442.5		1482.83	17338		1482.83	31649.9		1482.83	26113.5		1482.83	12195.3		1482.83	31006.6		1482.83	28143.2		1482.83	17344.3		1482.83	22006.1		1482.83	10506		1482.83	25068.4		1482.83
1484.52	23839.6	1.29247		1484.52	21806.1		1484.52	12523.1		1484.52	22739.6		1484.52	17590.4		1484.52	22348.2		1484.52	17249.8		1484.52	31649.9		1484.52	26109.8		1484.52	12224.4		1484.52	30970.1		1484.52	28092.6		1484.52	17253		1484.52	22005.8		1484.52	10511.9		1484.52	25028.6		1484.52
1486.21	23859.9	1.29357		1486.21	21822.7		1486.21	12557.6		1486.21	22714.6		1486.21	17633.2		1486.21	22443.4		1486.21	17280.3		1486.21	31649.9		1486.21	26154.4		1486.21	12192.5		1486.21	31024.9		1486.21	28095.5		1486.21	17320.8		1486.21	22021.7		1486.21	10484.6		1486.21	25096.7		1486.21
1487.89	23918.4	1.29674		1487.89	21892.1		1487.89	12523.9		1487.89	22723.6		1487.89	17654.4		1487.89	22469.5		1487.89	17323.3		1487.89	31649.9		1487.89	26128.2		1487.89	12211.1		1487.89	31049		1487.89	28184.7		1487.89	17386.9		1487.89	22023.8		1487.89	10535.3		1487.89	25084.4		1487.89
1489.58	23960.8	1.29904		1489.58	21963		1489.58	12543		1489.58	22748.5		1489.58	17725.8		1489.58	22491		1489.58	17347.5		1489.58	31649.9		1489.58	26238		1489.58	12251.8		1489.58	31097.3		1489.58	28251.3		1489.58	17393.6		1489.58	22085.7		1489.58	10520.2		1489.58	25175.4		1489.58
1491.26	23946	1.29824		1491.26	21861.9		1491.26	12578.5		1491.26	22778.7		1491.26	17682.1		1491.26	22516.7		1491.26	17360		1491.26	31649.9		1491.26	26211.9		1491.26	12231.7		1491.26	31061.7		1491.26	28158.3		1491.26	17380		1491.26	22051.8		1491.26	10510.1		1491.26	25136.1		1491.26
1492.95	24000.8	1.30121		1492.95	21889.6		1492.95	12564		1492.95	22750.7		1492.95	17690.6		1492.95	22519.8		1492.95	17370.4		1492.95	31649.9		1492.95	26241		1492.95	12223.6		1492.95	31099.8		1492.95	28171.7		1492.95	17351.8		1492.95	22089.8		1492.95	10522.2		1492.95	25154.9		1492.95
1494.64	24072.3	1.30509		1494.64	21938.9		1494.64	12576.2		1494.64	22808.7		1494.64	17706.8		1494.64	22562.5		1494.64	17364		1494.64	31649.9		1494.64	26263.2		1494.64	12256.8		1494.64	31070.4		1494.64	28240.8		1494.64	17366.2		1494.64	22127.2		1494.64	10553.3		1494.64	25140.9		1494.64
1496.32	23949.8	1.29844		1496.32	21945.4		1496.32	12588.9		1496.32	22778.2		1496.32	17672.7		1496.32	22497.5		1496.32	17333.3		1496.32	31649.9		1496.32	26305		1496.32	12303.7		1496.32	31130.1		1496.32	28225.7		1496.32	17408.4		1496.32	22154.9		1496.32	10528		1496.32	25205.9		1496.32
1498	24050.5	1.30391		1498	21884.3		1498	12550.1		1498	22848.1		1498	17672.3		1498	22563		1498	17353.6		1498	31649.9		1498	26329.8		1498	12276.6		1498	31102		1498	28234.3		1498	17452.7		1498	22027.5		1498	10568.3		1498	25170.9		1498
1499.69	24042.2	1.30346		1499.69	21946.4		1499.69	12606.2		1499.69	22848.7		1499.69	17742.8		1499.69	22626.5		1499.69	17444.8		1499.69	31649.9		1499.69	26230.4		1499.69	12282.3		1499.69	31156.7		1499.69	28262.7		1499.69	17429.1		1499.69	22108.3		1499.69	10559.6		1499.69	25185.6		1499.69
1501.37	24019.3	1.30222		1501.37	21924.7		1501.37	12592.9		1501.37	22817.1		1501.37	17740.2		1501.37	22565		1501.37	17387.5		1501.37	31649.9		1501.37	26281.2		1501.37	12263.8		1501.37	31124.8		1501.37	28252.4		1501.37	17440.3		1501.37	22117.5		1501.37	10517.9		1501.37	25224.9		1501.37
1503.06	24056.4	1.30422		1503.06	21947.1		1503.06	12604.9		1503.06	22866.5		1503.06	17703.5		1503.06	22561.5		1503.06	17384.9		1503.06	31649.9		1503.06	26308.6		1503.06	12291.8		1503.06	31114.7		1503.06	28288.7		1503.06	17425.5		1503.06	22089		1503.06	10559.7		1503.06	25243.4		1503.06
1504.74	24060.1	1.30443		1504.74	21987.5		1504.74	12635.8		1504.74	22897.4		1504.74	17745.2		1504.74	22662.1		1504.74	17469		1504.74	31649.9		1504.74	26319.3		1504.74	12289.4		1504.74	31172.6		1504.74	28279.4		1504.74	17505.7		1504.74	22069.1		1504.74	10575.6		1504.74	25255.8		1504.74
1506.42	24053.3	1.30405		1506.42	21980.3		1506.42	12649.6		1506.42	22896.8		1506.42	17772.6		1506.42	22627		1506.42	17459.8		1506.42	31649.9		1506.42	26312.8		1506.42	12324.7		1506.42	31142		1506.42	28340.4		1506.42	17463.6		1506.42	22165.2		1506.42	10598.6		1506.42	25215.9		1506.42
1508.1	24037.5	1.3032		1508.1	22071.2		1508.1	12612.9		1508.1	22881.1		1508.1	17772		1508.1	22640.5		1508.1	17458.8		1508.1	31649.9		1508.1	26364.3		1508.1	12304.2		1508.1	31175.3		1508.1	28318.8		1508.1	17477.9		1508.1	22209.5		1508.1	10626.8		1508.1	25319		1508.1
1509.78	24114.9	1.3074		1509.78	22051.7		1509.78	12699.6		1509.78	22942.9		1509.78	17758.8		1509.78	22660.6		1509.78	17441.1		1509.78	31649.9		1509.78	26357.6		1509.78	12350		1509.78	31144		1509.78	28411.5		1509.78	17514		1509.78	22180.9		1509.78	10626.1		1509.78	25333.8		1509.78
1511.47	24180.7	1.31097		1511.47	22076.2		1511.47	12651.9		1511.47	22940		1511.47	17803.4		1511.47	22701.7		1511.47	17478.8		1511.47	31649.9		1511.47	26401.9		1511.47	12321.9		1511.47	31233.1		1511.47	28364.8		1511.47	17529.1		1511.47	22163.7		1511.47	10607.9		1511.47	25294.8		1511.47
1513.15	24146	1.30908		1513.15	21993.3		1513.15	12649.9		1513.15	22932.7		1513.15	17841.1		1513.15	22695.1		1513.15	17466.7		1513.15	31649.9		1513.15	26404.3		1513.15	12328		1513.15	31220.9		1513.15	28332.4		1513.15	17480.8		1513.15	22217.2		1513.15	10621.3		1513.15	25301.1		1513.15
1514.83	24254.9	1.31499		1514.83	22039.9		1514.83	12641.8		1514.83	22976.3		1514.83	17771.7		1514.83	22670.6		1514.83	17524		1514.83	31649.9		1514.83	26447.7		1514.83	12363.2		1514.83	31212.3		1514.83	28417.4		1514.83	17524.4		1514.83	22227.1		1514.83	10580.4		1514.83	25340.1		1514.83
1516.51	24137.1	1.3086		1516.51	22065.2		1516.51	12654.7		1516.51	22963.2		1516.51	17840.2		1516.51	22722.3		1516.51	17486.4		1516.51	31649.9		1516.51	26481.5		1516.51	12339.1		1516.51	31232.2		1516.51	28413.2		1516.51	17550.5		1516.51	22236.4		1516.51	10644.4		1516.51	25330.5		1516.51
1518.19	24142.8	1.30891		1518.19	22074.3		1518.19	12624.4		1518.19	22957.5		1518.19	17695.2		1518.19	22680.2		1518.19	17464.1		1518.19	31649.9		1518.19	26353.7		1518.19	12333.2		1518.19	31169.4		1518.19	28363.2		1518.19	17516.8		1518.19	22149.6		1518.19	10584.4		1518.19	25289.7		1518.19
1519.87	24135.5	1.30851		1519.87	22064.5		1519.87	12669		1519.87	22990.1		1519.87	17789		1519.87	22676.7		1519.87	17499.7		1519.87	31649.9		1519.87	26364.2		1519.87	12320.2		1519.87	31202.6		1519.87	28301.8		1519.87	17526.3		1519.87	22213.9		1519.87	10604.4		1519.87	25298.6		1519.87
1521.55	24089.1	1.306		1521.55	21986.2		1521.55	12679.4		1521.55	23002.5		1521.55	17751.8		1521.55	22674.7		1521.55	17489.4		1521.55	31649.9		1521.55	26386.4		1521.55	12355.5		1521.55	31210.5		1521.55	28348.7		1521.55	17491.8		1521.55	22187.1		1521.55	10586.8		1521.55	25378.1		1521.55
1523.23	24087.7	1.30592		1523.23	22066.7		1523.23	12674.4		1523.23	22929.8		1523.23	17820.8		1523.23	22630.3		1523.23	17490.3		1523.23	31649.9		1523.23	26410.4		1523.23	12356.2		1523.23	31285		1523.23	28389		1523.23	17503.2		1523.23	22205.7		1523.23	10635.7		1523.23	25393.3		1523.23
1524.91	24195	1.31174		1524.91	22113.7		1524.91	12691.7		1524.91	23040		1524.91	17835.5		1524.91	22739.1		1524.91	17504.3		1524.91	31649.9		1524.91	26410.2		1524.91	12357.8		1524.91	31302.9		1524.91	28452.2		1524.91	17523.3		1524.91	22222.6		1524.91	10639.8		1524.91	25414.6		1524.91
1526.59	24240	1.31418		1526.59	22089		1526.59	12684.9		1526.59	23035.9		1526.59	17785.6		1526.59	22802.6		1526.59	17565.7		1526.59	31649.9		1526.59	26492.3		1526.59	12379.2		1526.59	31284.6		1526.59	28420.5		1526.59	17580.9		1526.59	22274.1		1526.59	10679		1526.59	25423.3		1526.59
1528.27	24209.5	1.31253		1528.27	22109.6		1528.27	12694.1		1528.27	23047.6		1528.27	17858.5		1528.27	22811.9		1528.27	17521.6		1528.27	31649.9		1528.27	26465.3		1528.27	12390.5		1528.27	31271.9		1528.27	28446.6		1528.27	17609.5		1528.27	22294.3		1528.27	10607.6		1528.27	25433.6		1528.27
1529.94	24202.7	1.31215		1529.94	22030.7		1529.94	12695.3		1529.94	23052.3		1529.94	17824.3		1529.94	22744.3		1529.94	17559.1		1529.94	31649.9		1529.94	26534.3		1529.94	12396.3		1529.94	31218		1529.94	28526.3		1529.94	17558		1529.94	22305.3		1529.94	10653.3		1529.94	25458.2		1529.94
1531.62	24268.7	1.31574		1531.62	22155.2		1531.62	12718.1		1531.62	23092.3		1531.62	17853.7		1531.62	22795.2		1531.62	17621.7		1531.62	31649.9		1531.62	26546.8		1531.62	12433.5		1531.62	31294.4		1531.62	28482.7		1531.62	17627.8		1531.62	22265.7		1531.62	10661.6		1531.62	25519.3		1531.62
1533.3	24277.6	1.31622		1533.3	22190.7		1533.3	12725.6		1533.3	23097.9		1533.3	17872.4		1533.3	22816.1		1533.3	17608.2		1533.3	31649.9		1533.3	26550.7		1533.3	12414.5		1533.3	31275.6		1533.3	28506.6		1533.3	17624.5		1533.3	22317.7		1533.3	10672.6		1533.3	25491.3		1533.3
1534.98	24204.7	1.31226		1534.98	22170.5		1534.98	12724.3		1534.98	23075.1		1534.98	17841.5		1534.98	22805.1		1534.98	17617.7		1534.98	31649.9		1534.98	26510.6		1534.98	12415.2		1534.98	31251.6		1534.98	28508.3		1534.98	17619.3		1534.98	22323.7		1534.98	10710.7		1534.98	25481.1		1534.98
1536.65	24298.9	1.31737		1536.65	22107.2		1536.65	12759		1536.65	23133.7		1536.65	17869.5		1536.65	22810.8		1536.65	17604.6		1536.65	31649.9		1536.65	26552.1		1536.65	12434.8		1536.65	31312.1		1536.65	28544.8		1536.65	17642.4		1536.65	22323.3		1536.65	10660.7		1536.65	25542.6		1536.65
1538.33	24223	1.31326		1538.33	22171.9		1538.33	12749.6		1538.33	23130.5		1538.33	17945.8		1538.33	22793.8		1538.33	17657.4		1538.33	31649.9		1538.33	26631.4		1538.33	12435.2		1538.33	31341.1		1538.33	28545.5		1538.33	17642.3		1538.33	22313.3		1538.33	10679.5		1538.33	25509.8		1538.33
1540.01	24267.6	1.31568		1540.01	22258.3		1540.01	12831.8		1540.01	23186.3		1540.01	17986.4		1540.01	22864.7		1540.01	17666.9		1540.01	31649.9		1540.01	26636.1		1540.01	12450.8		1540.01	31345.1		1540.01	28612.9		1540.01	17682.8		1540.01	22302.9		1540.01	10697.2		1540.01	25590.1		1540.01
1541.68	24283.7	1.31655		1541.68	22259.8		1541.68	12794.2		1541.68	23231.8		1541.68	17931.2		1541.68	22897.2		1541.68	17664.6		1541.68	31649.9		1541.68	26586.8		1541.68	12457.4		1541.68	31362.6		1541.68	28568.1		1541.68	17663.9		1541.68	22351.5		1541.68	10710.5		1541.68	25595.5		1541.68
1543.36	24417.2	1.32379		1543.36	22274.1		1543.36	12803.2		1543.36	23281.6		1543.36	17951.5		1543.36	22819.4		1543.36	17704.8		1543.36	31649.9		1543.36	26702.7		1543.36	12501.4		1543.36	31313.1		1543.36	28598.1		1543.36	17759.2		1543.36	22439.7		1543.36	10717.7		1543.36	25600.2		1543.36
1545.03	24372.5	1.32136		1545.03	22258.1		1545.03	12813.3		1545.03	23273.3		1545.03	18006.6		1545.03	22871.1		1545.03	17674.2		1545.03	31649.9		1545.03	26656.6		1545.03	12510		1545.03	31356.6		1545.03	28617.2		1545.03	17716.3		1545.03	22402.3		1545.03	10737.4		1545.03	25590		1545.03
1546.71	24356.4	1.32049		1546.71	22291.3		1546.71	12852.8		1546.71	23320.2		1546.71	17958.8		1546.71	22914.2		1546.71	17708		1546.71	31649.9		1546.71	26704.3		1546.71	12535.6		1546.71	31366		1546.71	28672		1546.71	17749		1546.71	22381.4		1546.71	10741		1546.71	25644.6		1546.71
1548.38	24370.5	1.32126		1548.38	22255.5		1548.38	12808.6		1548.38	23213.1		1548.38	17981.9		1548.38	22908.3		1548.38	17690.9		1548.38	31649.9		1548.38	26643.6		1548.38	12468.5		1548.38	31372.9		1548.38	28593.4		1548.38	17764.4		1548.38	22431		1548.38	10712.9		1548.38	25655.1		1548.38
1550.05	24440	1.32502		1550.05	22251.6		1550.05	12811.9		1550.05	23264.8		1550.05	17934.4		1550.05	22872.5		1550.05	17718.7		1550.05	31649.9		1550.05	26734.9		1550.05	12528		1550.05	31351.1		1550.05	28617.4		1550.05	17757.6		1550.05	22470.4		1550.05	10713.1		1550.05	25599.3		1550.05
1551.73	24465.2	1.32639		1551.73	22305.1		1551.73	12845.4		1551.73	23277.8		1551.73	18030.1		1551.73	22937.2		1551.73	17716.6		1551.73	31649.9		1551.73	26813.7		1551.73	12582.1		1551.73	31414.1		1551.73	28654.3		1551.73	17730.5		1551.73	22454.3		1551.73	10725.6		1551.73	25710.4		1551.73
1553.4	24456	1.32589		1553.4	22376		1553.4	12880.3		1553.4	23357.4		1553.4	18068.5		1553.4	22982.3		1553.4	17723.9		1553.4	31649.9		1553.4	26758.8		1553.4	12533.8		1553.4	31428.2		1553.4	28695.6		1553.4	17808.3		1553.4	22505.2		1553.4	10783.8		1553.4	25743.5		1553.4
1555.07	24425.7	1.32425		1555.07	22351.1		1555.07	12874.3		1555.07	23372.5		1555.07	18109.1		1555.07	23005.7		1555.07	17773.1		1555.07	31649.9		1555.07	26746.5		1555.07	12499.3		1555.07	31426.8		1555.07	28709.9		1555.07	17791.6		1555.07	22468.8		1555.07	10751.3		1555.07	25736.1		1555.07
1556.75	24439.1	1.32497		1556.75	22311		1556.75	12891.1		1556.75	23322.2		1556.75	18050.3		1556.75	22931.7		1556.75	17716.8		1556.75	31649.9		1556.75	26696.8		1556.75	12539.4		1556.75	31421.8		1556.75	28693.7		1556.75	17804		1556.75	22455.8		1556.75	10730.3		1556.75	25724.6		1556.75
1558.42	24428.3	1.32439		1558.42	22277.1		1558.42	12875.2		1558.42	23323.1		1558.42	18045.9		1558.42	22973.4		1558.42	17767.1		1558.42	31649.9		1558.42	26642.1		1558.42	12567.4		1558.42	31446.8		1558.42	28672.3		1558.42	17778.8		1558.42	22405.7		1558.42	10753.7		1558.42	25733.8		1558.42
1560.09	24462.1	1.32622		1560.09	22342.2		1560.09	12865.3		1560.09	23316		1560.09	18054.9		1560.09	22978.1		1560.09	17811.4		1560.09	31649.9		1560.09	26780.4		1560.09	12549.9		1560.09	31437.5		1560.09	28690.8		1560.09	17822.5		1560.09	22462.8		1560.09	10775.6		1560.09	25768.5		1560.09
1561.77	24412.2	1.32352		1561.77	22302.8		1561.77	12897.8		1561.77	23331.3		1561.77	18061.7		1561.77	23033.6		1561.77	17773.3		1561.77	31649.9		1561.77	26796.8		1561.77	12586.5		1561.77	31392.3		1561.77	28681.7		1561.77	17874.8		1561.77	22506.4		1561.77	10732.1		1561.77	25773		1561.77
1563.44	24547.2	1.33083		1563.44	22337.9		1563.44	12884.5		1563.44	23392.5		1563.44	18076.5		1563.44	22994.5		1563.44	17779.8		1563.44	31649.9		1563.44	26781.1		1563.44	12585.3		1563.44	31442.7		1563.44	28671.4		1563.44	17864.7		1563.44	22563.7		1563.44	10807.6		1563.44	25767.6		1563.44
1565.11	24490.4	1.32775		1565.11	22340.9		1565.11	12935.2		1565.11	23425.5		1565.11	18086		1565.11	23056.5		1565.11	17783.9		1565.11	31649.9		1565.11	26777.6		1565.11	12579.5		1565.11	31420.2		1565.11	28733.5		1565.11	17830.4		1565.11	22534.7		1565.11	10761.2		1565.11	25798.3		1565.11
1566.78	24524.7	1.32961		1566.78	22404.3		1566.78	12966.1		1566.78	23425.2		1566.78	18128.9		1566.78	23093.8		1566.78	17871.6		1566.78	31649.9		1566.78	26858.2		1566.78	12596.1		1566.78	31455.8		1566.78	28733.1		1566.78	17908.1		1566.78	22627.2		1566.78	10753.1		1566.78	25911.1		1566.78
1568.45	24581.4	1.33269		1568.45	22418.9		1568.45	12995.9		1568.45	23491.2		1568.45	18166		1568.45	23107		1568.45	17864.1		1568.45	31649.9		1568.45	26906.8		1568.45	12642		1568.45	31460.4		1568.45	28833		1568.45	17870.7		1568.45	22570.1		1568.45	10782.9		1568.45	25935.6		1568.45
1570.12	24542.4	1.33058		1570.12	22400.8		1570.12	12989.3		1570.12	23466.5		1570.12	18150.6		1570.12	23124.1		1570.12	17906		1570.12	31649.9		1570.12	26850.9		1570.12	12631.7		1570.12	31439.6		1570.12	28789.3		1570.12	17918.7		1570.12	22565.7		1570.12	10788.3		1570.12	25882.2		1570.12
1571.79	24629.4	1.33529		1571.79	22574.7		1571.79	13003.2		1571.79	23500.4		1571.79	18211.9		1571.79	23159.4		1571.79	17872.4		1571.79	31649.9		1571.79	26994.3		1571.79	12685.6		1571.79	31500.1		1571.79	28819.9		1571.79	17934.8		1571.79	22648.4		1571.79	10817.7		1571.79	25978.7		1571.79
1573.46	24607.9	1.33412		1573.46	22527.8		1573.46	12988.6		1573.46	23523.4		1573.46	18236		1573.46	23202.3		1573.46	17922.9		1573.46	31649.9		1573.46	27009.6		1573.46	12689.4		1573.46	31517.6		1573.46	28857		1573.46	17909.4		1573.46	22686.2		1573.46	10828.6		1573.46	25965.5		1573.46
1575.13	24650.2	1.33642		1575.13	22481.6		1575.13	13066.7		1575.13	23581.6		1575.13	18281.2		1575.13	23148.5		1575.13	17907.2		1575.13	31649.9		1575.13	27019.3		1575.13	12669.4		1575.13	31526.7		1575.13	28882.8		1575.13	17996.9		1575.13	22643.3		1575.13	10815.3		1575.13	25939.8		1575.13
1576.8	24638.8	1.3358		1576.8	22560.6		1576.8	12980.3		1576.8	23511.4		1576.8	18217.3		1576.8	23139.1		1576.8	17974.7		1576.8	31649.9		1576.8	27009.5		1576.8	12668		1576.8	31522.6		1576.8	28867.3		1576.8	17959.8		1576.8	22630		1576.8	10859.4		1576.8	25984.6		1576.8
1578.47	24658.6	1.33688		1578.47	22584.6		1578.47	13046.6		1578.47	23621		1578.47	18201.3		1578.47	23170.5		1578.47	17964.7		1578.47	31649.9		1578.47	27037.2		1578.47	12722.5		1578.47	31513.4		1578.47	28910.6		1578.47	17963.7		1578.47	22688.2		1578.47	10852.3		1578.47	26006.8		1578.47
1580.13	24710.7	1.3397		1580.13	22555.7		1580.13	13038.5		1580.13	23682		1580.13	18271.7		1580.13	23247.1		1580.13	17987.3		1580.13	31649.9		1580.13	27073.4		1580.13	12743.1		1580.13	31557.5		1580.13	28935.3		1580.13	18007.6		1580.13	22715.1		1580.13	10850.3		1580.13	26097.2		1580.13
1581.8	24733.6	1.34094		1581.8	22621		1581.8	13052		1581.8	23582.1		1581.8	18294		1581.8	23282.9		1581.8	17988.9		1581.8	31649.9		1581.8	27019.9		1581.8	12734.3		1581.8	31539.8		1581.8	28960.8		1581.8	18042.8		1581.8	22668.2		1581.8	10823.8		1581.8	26017.2		1581.8
1583.47	24697.7	1.33899		1583.47	22608.7		1583.47	13156.6		1583.47	23652.7		1583.47	18273.9		1583.47	23300.1		1583.47	18005		1583.47	31649.9		1583.47	27100.1		1583.47	12720.2		1583.47	31532		1583.47	28940.8		1583.47	18003.1		1583.47	22703.1		1583.47	10889.3		1583.47	26063.1		1583.47
1585.14	24733.7	1.34095		1585.14	22589.8		1585.14	13095.4		1585.14	23656.3		1585.14	18329.5		1585.14	23322.3		1585.14	18011.5		1585.14	31649.9		1585.14	27114.5		1585.14	12774.6		1585.14	31535.2		1585.14	29021.6		1585.14	18032.3		1585.14	22800.2		1585.14	10901.3		1585.14	26133		1585.14
1586.8	24740.7	1.34133		1586.8	22636.8		1586.8	13128.5		1586.8	23695.4		1586.8	18289.3		1586.8	23333.5		1586.8	18076.4		1586.8	31649.9		1586.8	27146.4		1586.8	12786		1586.8	31554.5		1586.8	29007.1		1586.8	18073.5		1586.8	22720.6		1586.8	10901.9		1586.8	26091.4		1586.8
1588.47	24846.3	1.34705		1588.47	22614.3		1588.47	13149.3		1588.47	23742.6		1588.47	18302		1588.47	23367		1588.47	18000		1588.47	31649.9		1588.47	27144.8		1588.47	12746.5		1588.47	31533.3		1588.47	29043.2		1588.47	18095.9		1588.47	22726.6		1588.47	10870.3		1588.47	26082.5		1588.47
1590.13	24829.6	1.34615		1590.13	22716.7		1590.13	13127.1		1590.13	23732.2		1590.13	18351.2		1590.13	23380.6		1590.13	18087.2		1590.13	31649.9		1590.13	27193.9		1590.13	12801.4		1590.13	31547		1590.13	29012.4		1590.13	18089.5		1590.13	22826.9		1590.13	10928.1		1590.13	26160.9		1590.13
1591.8	24848.2	1.34715		1591.8	22689.9		1591.8	13174.6		1591.8	23775.6		1591.8	18409.8		1591.8	23451		1591.8	18095.4		1591.8	31649.9		1591.8	27222.7		1591.8	12799		1591.8	31578.1		1591.8	29058.7		1591.8	18142.8		1591.8	22799.3		1591.8	10898		1591.8	26214.2		1591.8
1593.47	24834.9	1.34643		1593.47	22690.2		1593.47	13166.9		1593.47	23779.7		1593.47	18347.4		1593.47	23383.4		1593.47	18040.9		1593.47	31649.9		1593.47	27212.6		1593.47	12795.7		1593.47	31578.9		1593.47	29058.1		1593.47	18123.7		1593.47	22757.3		1593.47	10895.3		1593.47	26217.4		1593.47
1595.13	24864.6	1.34804		1595.13	22805.3		1595.13	13207.1		1595.13	23832.4		1595.13	18381		1595.13	23436.9		1595.13	18119.7		1595.13	31649.9		1595.13	27347.8		1595.13	12831.3		1595.13	31599.5		1595.13	29164.1		1595.13	18123		1595.13	22815.8		1595.13	10935.7		1595.13	26279.9		1595.13
1596.8	24904.2	1.35019		1596.8	22711.5		1596.8	13211.4		1596.8	23846.1		1596.8	18451.7		1596.8	23475		1596.8	18119.2		1596.8	31649.9		1596.8	27297		1596.8	12804.9		1596.8	31604.5		1596.8	29129.7		1596.8	18169.5		1596.8	22909.9		1596.8	10910.8		1596.8	26338.9		1596.8
1598.46	24965.1	1.35349		1598.46	22799.8		1598.46	13177.7		1598.46	23899.3		1598.46	18453.8		1598.46	23526		1598.46	18181.2		1598.46	31649.9		1598.46	27323.3		1598.46	12825.7		1598.46	31591.4		1598.46	29144.8		1598.46	18209.4		1598.46	22896.1		1598.46	10948.1		1598.46	26305.2		1598.46
1600.13	24880.5	1.3489		1600.13	22715.8		1600.13	13173.6		1600.13	23871.1		1600.13	18440.6		1600.13	23535.3		1600.13	18141.9		1600.13	31649.9		1600.13	27292.3		1600.13	12877.1		1600.13	31608.9		1600.13	29151.1		1600.13	18187		1600.13	22886.9		1600.13	10965.2		1600.13	26318.2		1600.13
1601.79	24950.7	1.35271		1601.79	22815.9		1601.79	13236.3		1601.79	23879		1601.79	18467.4		1601.79	23510.8		1601.79	18192.8		1601.79	31649.9		1601.79	27407.1		1601.79	12868.4		1601.79	31608.9		1601.79	29190		1601.79	18255.2		1601.79	22991.4		1601.79	10995.6		1601.79	26308		1601.79
1603.45	24957.8	1.35309		1603.45	22815		1603.45	13214.5		1603.45	23897.9		1603.45	18434.3		1603.45	23563.4		1603.45	18146.7		1603.45	31649.9		1603.45	27333		1603.45	12874.6		1603.45	31587.6		1603.45	29153.9		1603.45	18170.3		1603.45	22892.2		1603.45	10966.4		1603.45	26398.7		1603.45
1605.12	24979.7	1.35428		1605.12	22869.1		1605.12	13201.4		1605.12	23947.3		1605.12	18501.6		1605.12	23575.8		1605.12	18210.2		1605.12	31649.9		1605.12	27392.9		1605.12	12900.8		1605.12	31603.2		1605.12	29234		1605.12	18237.9		1605.12	22938.9		1605.12	10970		1605.12	26372.7		1605.12
1606.78	25041.4	1.35763		1606.78	22845.7		1606.78	13274.7		1606.78	23941.8		1606.78	18542.3		1606.78	23689.3		1606.78	18255.1		1606.78	31649.9		1606.78	27483.3		1606.78	12915.4		1606.78	31608.9		1606.78	29325		1606.78	18266.2		1606.78	23025.4		1606.78	11000		1606.78	26441.6		1606.78
1608.44	25066.2	1.35897		1608.44	22919.1		1608.44	13284.6		1608.44	23995.2		1608.44	18589.8		1608.44	23632.9		1608.44	18227.7		1608.44	31649.9		1608.44	27503.7		1608.44	12919.4		1608.44	31608.9		1608.44	29298.9		1608.44	18309.1		1608.44	23000.7		1608.44	11013.2		1608.44	26429.9		1608.44
1610.1	25038.1	1.35745		1610.1	22927.7		1610.1	13255.7		1610.1	24031.5		1610.1	18530.5		1610.1	23604.1		1610.1	18214.3		1610.1	31649.9		1610.1	27526.1		1610.1	12898.2		1610.1	31608.9		1610.1	29267.2		1610.1	18308.4		1610.1	23030.5		1610.1	11017.4		1610.1	26495.8		1610.1
1611.77	25033.2	1.35718		1611.77	22872.3		1611.77	13301.7		1611.77	23967.3		1611.77	18559.7		1611.77	23697.1		1611.77	18259.1		1611.77	31649.9		1611.77	27535.6		1611.77	12935.2		1611.77	31608.9		1611.77	29273.7		1611.77	18296.1		1611.77	22988.7		1611.77	11022.9		1611.77	26527.4		1611.77
1613.43	25132.8	1.36258		1613.43	22937.3		1613.43	13298.3		1613.43	24035.8		1613.43	18604		1613.43	23694.5		1613.43	18296.6		1613.43	31649.9		1613.43	27522.1		1613.43	12991.1		1613.43	31608.9		1613.43	29404.2		1613.43	18350.6		1613.43	23057.8		1613.43	11032.2		1613.43	26481.9		1613.43
1615.09	25104.1	1.36102		1615.09	22934.3		1615.09	13305.3		1615.09	24032.3		1615.09	18594.3		1615.09	23630.7		1615.09	18296.1		1615.09	31649.9		1615.09	27550.6		1615.09	13013.5		1615.09	31608.9		1615.09	29418.6		1615.09	18308.7		1615.09	23050		1615.09	11041.2		1615.09	26534		1615.09
1616.75	25112.3	1.36147		1616.75	22967.5		1616.75	13285.2		1616.75	24039.3		1616.75	18492.8		1616.75	23658.4		1616.75	18279.3		1616.75	31649.9		1616.75	27570.3		1616.75	12980		1616.75	31608.9		1616.75	29385.1		1616.75	18293.7		1616.75	23042		1616.75	11023.7		1616.75	26514.4		1616.75
1618.41	25173	1.36476		1618.41	22990.8		1618.41	13305.9		1618.41	24096.1		1618.41	18595.2		1618.41	23711.3		1618.41	18353.8		1618.41	31649.9		1618.41	27570.3		1618.41	12990.1		1618.41	31608.9		1618.41	29418.1		1618.41	18330.4		1618.41	23104.9		1618.41	11055.9		1618.41	26559		1618.41
1620.07	25156.3	1.36386		1620.07	23055.9		1620.07	13283.2		1620.07	24097.4		1620.07	18625		1620.07	23700.3		1620.07	18352.4		1620.07	31649.9		1620.07	27543.2		1620.07	12951.6		1620.07	31608.9		1620.07	29399.1		1620.07	18283.4		1620.07	23103.1		1620.07	11046.7		1620.07	26536.3		1620.07
1621.73	25110.8	1.36139		1621.73	23030.4		1621.73	13265		1621.73	24017.7		1621.73	18620.3		1621.73	23692.7		1621.73	18355.4		1621.73	31649.9		1621.73	27598		1621.73	12943.8		1621.73	31608.9		1621.73	29475		1621.73	18315.8		1621.73	23117.7		1621.73	11049.1		1621.73	26525.1		1621.73
1623.39	25207.6	1.36664		1623.39	23097.4		1623.39	13285.3		1623.39	24144.8		1623.39	18595.5		1623.39	23742.3		1623.39	18325.6		1623.39	31649.9		1623.39	27609.1		1623.39	12972.7		1623.39	31608.9		1623.39	29487.8		1623.39	18324.3		1623.39	23179		1623.39	11076.7		1623.39	26555.2		1623.39
1625.05	25217.2	1.36716		1625.05	23042.5		1625.05	13280.4		1625.05	24142.9		1625.05	18598		1625.05	23773.4		1625.05	18377		1625.05	31649.9		1625.05	27615.3		1625.05	12983.3		1625.05	31608.9		1625.05	29480.3		1625.05	18368.7		1625.05	23120		1625.05	11101		1625.05	26610.4		1625.05
1626.71	25267.9	1.36991		1626.71	23122.7		1626.71	13276		1626.71	24111.2		1626.71	18642.3		1626.71	23775		1626.71	18357.1		1626.71	31649.9		1626.71	27614.7		1626.71	13007.4		1626.71	31608.9		1626.71	29504.1		1626.71	18373.5		1626.71	23249.6		1626.71	11035.5		1626.71	26634.2		1626.71
1628.37	25258.1	1.36937		1628.37	23090.1		1628.37	13274.8		1628.37	24099.8		1628.37	18641.2		1628.37	23761.4		1628.37	18353.9		1628.37	31649.9		1628.37	27635.1		1628.37	12972.4		1628.37	31608.9		1628.37	29516.1		1628.37	18352.2		1628.37	23228.6		1628.37	11084.2		1628.37	26598.6		1628.37
1630.03	25202.9	1.36638		1630.03	23091.6		1630.03	13296.2		1630.03	24108.3		1630.03	18574.1		1630.03	23759.4		1630.03	18373.5		1630.03	31649.9		1630.03	27672.3		1630.03	12982.4		1630.03	31608.9		1630.03	29510.2		1630.03	18330.7		1630.03	23230.7		1630.03	11117.2		1630.03	26622.4		1630.03
1631.69	25243.5	1.36858		1631.69	23137.9		1631.69	13268.6		1631.69	24076.6		1631.69	18574.4		1631.69	23723.7		1631.69	18327.4		1631.69	31649.9		1631.69	27618.7		1631.69	12996.1		1631.69	31608.9		1631.69	29531.3		1631.69	18340.2		1631.69	23189.1		1631.69	11045.1		1631.69	26594.3		1631.69
1633.34	25281.2	1.37063		1633.34	23150.8		1633.34	13285.2		1633.34	24096.9		1633.34	18600		1633.34	23713.8		1633.34	18364.7		1633.34	31649.9		1633.34	27649.4		1633.34	12991.2		1633.34	31608.9		1633.34	29492.7		1633.34	18280.2		1633.34	23236.3		1633.34	11096.2		1633.34	26645.3		1633.34
1635	25218.3	1.36722		1635	23166.4		1635	13248.5		1635	24130.9		1635	18600		1635	23740.8		1635	18402.7		1635	31649.9		1635	27672.4		1635	12986.4		1635	31608.9		1635	29620.8		1635	18336.6		1635	23290.9		1635	11102.8		1635	26623.8		1635
1636.66	25232.8	1.36801		1636.66	23129.4		1636.66	13245.1		1636.66	24093.6		1636.66	18603.3		1636.66	23706.6		1636.66	18390.4		1636.66	31649.9		1636.66	27681.9		1636.66	12999.2		1636.66	31608.9		1636.66	29538.6		1636.66	18297.4		1636.66	23260.1		1636.66	11100.7		1636.66	26578.8		1636.66
1638.32	25279.1	1.37051		1638.32	23188.1		1638.32	13244.6		1638.32	24139.8		1638.32	18584.4		1638.32	23798.9		1638.32	18366.2		1638.32	31649.9		1638.32	27749.6		1638.32	12993.9		1638.32	31608.9		1638.32	29580.5		1638.32	18287.2		1638.32	23230.1		1638.32	11134.8		1638.32	26627		1638.32
1639.97	25285.8	1.37088		1639.97	23160.5		1639.97	13274.1		1639.97	24191.7		1639.97	18614.2		1639.97	23845.8		1639.97	18452.3		1639.97	31649.9		1639.97	27776.8		1639.97	13009.2		1639.97	31608.9		1639.97	29681.8		1639.97	18401.6		1639.97	23303.2		1639.97	11168.3		1639.97	26685.6		1639.97
1641.63	25308.6	1.37211		1641.63	23168		1641.63	13225.6		1641.63	24185.1		1641.63	18591.7		1641.63	23839		1641.63	18381.8		1641.63	31649.9		1641.63	27814.9		1641.63	13029.6		1641.63	31608.9		1641.63	29699.2		1641.63	18338.2		1641.63	23347.5		1641.63	11131.7		1641.63	26668.6		1641.63
1643.28	25343.7	1.37402		1643.28	23288.3		1643.28	13214.3		1643.28	24144.1		1643.28	18643.1		1643.28	23889.7		1643.28	18453.6		1643.28	31649.9		1643.28	27900.1		1643.28	13065.3		1643.28	31608.9		1643.28	29671.4		1643.28	18382.8		1643.28	23303.9		1643.28	11128.5		1643.28	26707.6		1643.28
1644.94	25379	1.37593		1644.94	23196		1644.94	13253.5		1644.94	24193.3		1644.94	18664.5		1644.94	23781.2		1644.94	18422.4		1644.94	31649.9		1644.94	27814.7		1644.94	13020.8		1644.94	31608.9		1644.94	29685.9		1644.94	18355.7		1644.94	23312.3		1644.94	11162.7		1644.94	26730.8		1644.94
1646.59	25368.5	1.37536		1646.59	23297.5		1646.59	13265.6		1646.59	24235.3		1646.59	18670.9		1646.59	23880.8		1646.59	18485.1		1646.59	31649.9		1646.59	27812.1		1646.59	13024.6		1646.59	31608.9		1646.59	29708.6		1646.59	18360.3		1646.59	23374.1		1646.59	11185.6		1646.59	26736.4		1646.59
1648.25	25365	1.37517		1648.25	23346.5		1648.25	13275.4		1648.25	24233.9		1648.25	18688.1		1648.25	23905.8		1648.25	18492.9		1648.25	31649.9		1648.25	27802		1648.25	13059.7		1648.25	31608.9		1648.25	29782.6		1648.25	18422.4		1648.25	23333.9		1648.25	11183.8		1648.25	26738.2		1648.25
1649.9	25406	1.37739		1649.9	23303.3		1649.9	13271.8		1649.9	24314.6		1649.9	18669		1649.9	23922.4		1649.9	18492.4		1649.9	31649.9		1649.9	27861.4		1649.9	13048.3		1649.9	31608.9		1649.9	29805.5		1649.9	18419.4		1649.9	23432.2		1649.9	11150.1		1649.9	26832.8		1649.9
1651.56	25477.4	1.38127		1651.56	23311.2		1651.56	13287.5		1651.56	24282.4		1651.56	18728.5		1651.56	23969.8		1651.56	18537.2		1651.56	31649.9		1651.56	27869.3		1651.56	13081.7		1651.56	31608.9		1651.56	29780.4		1651.56	18442		1651.56	23439		1651.56	11172.7		1651.56	26822.1		1651.56
1653.21	25479.4	1.38137		1653.21	23373.9		1653.21	13316.6		1653.21	24311.3		1653.21	18718.5		1653.21	23928.8		1653.21	18535.4		1653.21	31649.9		1653.21	27927.8		1653.21	13120.6		1653.21	31608.9		1653.21	29840.9		1653.21	18419.5		1653.21	23417.4		1653.21	11204		1653.21	26805.8		1653.21
1654.86	25598	1.38781		1654.86	23422.6		1654.86	13327.3		1654.86	24391.1		1654.86	18793.9		1654.86	24015.3		1654.86	18575		1654.86	31649.9		1654.86	27994.1		1654.86	13147.3		1654.86	31608.9		1654.86	29925.2		1654.86	18484.2		1654.86	23533.6		1654.86	11258.2		1654.86	26975.2		1654.86
1656.52	25521.3	1.38364		1656.52	23508.1		1656.52	13330.8		1656.52	24426.4		1656.52	18803.7		1656.52	24046.5		1656.52	18610.6		1656.52	31649.9		1656.52	28003.9		1656.52	13141		1656.52	31608.9		1656.52	29931.6		1656.52	18469.6		1656.52	23540.6		1656.52	11235.1		1656.52	26948.2		1656.52
1658.17	25558.7	1.38567		1658.17	23496.3		1658.17	13356.7		1658.17	24366.3		1658.17	18752.9		1658.17	24076.4		1658.17	18592.5		1658.17	31649.9		1658.17	28041.4		1658.17	13147.9		1658.17	31608.9		1658.17	29964.2		1658.17	18528.3		1658.17	23497.8		1658.17	11206.5		1658.17	26927.5		1658.17
1659.82	25573.5	1.38647		1659.82	23518		1659.82	13370.4		1659.82	24494.2		1659.82	18834		1659.82	24098.6		1659.82	18655.8		1659.82	31649.9		1659.82	28108.1		1659.82	13102.5		1659.82	31608.9		1659.82	29925.8		1659.82	18536.9		1659.82	23568.1		1659.82	11274.3		1659.82	27026.1		1659.82
1661.47	25630.7	1.38957		1661.47	23514.1		1661.47	13358.7		1661.47	24488.7		1661.47	18875.1		1661.47	24082.8		1661.47	18626.4		1661.47	31649.9		1661.47	28083.4		1661.47	13163.7		1661.47	31608.9		1661.47	29935		1661.47	18548		1661.47	23553.8		1661.47	11246		1661.47	26974.7		1661.47
1663.13	25672	1.39181		1663.13	23537.1		1663.13	13397		1663.13	24419.8		1663.13	18796.1		1663.13	24146.2		1663.13	18670.5		1663.13	31649.9		1663.13	28108.3		1663.13	13166.7		1663.13	31608.9		1663.13	30037.3		1663.13	18543		1663.13	23681.8		1663.13	11283.6		1663.13	27064.5		1663.13
1664.78	25598	1.3878		1664.78	23481.5		1664.78	13362.5		1664.78	24466.5		1664.78	18803.6		1664.78	24151.3		1664.78	18645.5		1664.78	31649.9		1664.78	28126.6		1664.78	13162		1664.78	31608.9		1664.78	29993.6		1664.78	18530.8		1664.78	23657		1664.78	11275.9		1664.78	27000.9		1664.78
1666.43	25702.8	1.39349		1666.43	23588		1666.43	13335.9		1666.43	24520.1		1666.43	18878.7		1666.43	24110.6		1666.43	18662.1		1666.43	31649.9		1666.43	28149.6		1666.43	13160		1666.43	31608.9		1666.43	29986.6		1666.43	18570.1		1666.43	23627		1666.43	11286.8		1666.43	27044.4		1666.43
1668.08	25764.5	1.39683		1668.08	23614.8		1668.08	13355		1668.08	24507		1668.08	18813.3		1668.08	24162.3		1668.08	18664.3		1668.08	31649.9		1668.08	28144.4		1668.08	13227.6		1668.08	31608.9		1668.08	29981.6		1668.08	18545.6		1668.08	23714.5		1668.08	11317.6		1668.08	27056.1		1668.08
1669.73	25691.2	1.39286		1669.73	23615.1		1669.73	13367		1669.73	24565.3		1669.73	18880		1669.73	24220.5		1669.73	18711.1		1669.73	31649.9		1669.73	28216.8		1669.73	13257		1669.73	31608.9		1669.73	30069.6		1669.73	18646.8		1669.73	23793.8		1669.73	11297		1669.73	27120.8		1669.73
1671.38	25763	1.39675		1671.38	23588.8		1671.38	13445.8		1671.38	24589.7		1671.38	18846.7		1671.38	24252.2		1671.38	18704.1		1671.38	31649.9		1671.38	28218.9		1671.38	13258.7		1671.38	31608.9		1671.38	30067.3		1671.38	18587.4		1671.38	23727.4		1671.38	11337.7		1671.38	27118.5		1671.38
1673.03	25792.6	1.39836		1673.03	23587.8		1673.03	13443.3		1673.03	24605.6		1673.03	18934		1673.03	24213.9		1673.03	18762.3		1673.03	31649.9		1673.03	28278.5		1673.03	13239.5		1673.03	31608.9		1673.03	30088.5		1673.03	18619.7		1673.03	23769.3		1673.03	11354.9		1673.03	27180.1		1673.03
1674.68	25781.5	1.39775		1674.68	23670.3		1674.68	13426.4		1674.68	24599.8		1674.68	18845.8		1674.68	24227.5		1674.68	18752.9		1674.68	31649.9		1674.68	28338.9		1674.68	13221.2		1674.68	31608.9		1674.68	30117.2		1674.68	18621.3		1674.68	23766.4		1674.68	11338.1		1674.68	27151.8		1674.68
1676.33	25735.2	1.39524		1676.33	23684.1		1676.33	13447.4		1676.33	24629.2		1676.33	18896.6		1676.33	24262.5		1676.33	18747		1676.33	31649.9		1676.33	28291.6		1676.33	13294.5		1676.33	31608.9		1676.33	30124.7		1676.33	18596		1676.33	23791.4		1676.33	11361.1		1676.33	27185.3		1676.33
1677.98	25936.4	1.40615		1677.98	23693		1677.98	13449.5		1677.98	24629.6		1677.98	18984.4		1677.98	24284.5		1677.98	18793		1677.98	31649.9		1677.98	28305.1		1677.98	13293		1677.98	31608.9		1677.98	30153.1		1677.98	18630		1677.98	23808.2		1677.98	11369.7		1677.98	27229.3		1677.98
1679.63	25813.9	1.39951		1679.63	23675.5		1679.63	13464.8		1679.63	24632.2		1679.63	18960.1		1679.63	24202		1679.63	18815.4		1679.63	31649.9		1679.63	28379.1		1679.63	13300.8		1679.63	31608.9		1679.63	30188.6		1679.63	18668.9		1679.63	23822.2		1679.63	11351.4		1679.63	27243.6		1679.63
1681.28	25814.3	1.39953		1681.28	23749.2		1681.28	13420.7		1681.28	24658.5		1681.28	18990.8		1681.28	24331.6		1681.28	18846.7		1681.28	31649.9		1681.28	28419.2		1681.28	13311.6		1681.28	31608.9		1681.28	30163.9		1681.28	18638.4		1681.28	23837.2		1681.28	11358.5		1681.28	27276		1681.28
1682.92	25943.3	1.40652		1682.92	23817.7		1682.92	13476.7		1682.92	24789.6		1682.92	18980.7		1682.92	24331.3		1682.92	18853.2		1682.92	31649.9		1682.92	28449.3		1682.92	13344.4		1682.92	31608.9		1682.92	30228.6		1682.92	18684.5		1682.92	23871.4		1682.92	11383.2		1682.92	27336.7		1682.92
1684.57	25885.4	1.40338		1684.57	23796.5		1684.57	13445.3		1684.57	24735.2		1684.57	19011.9		1684.57	24379		1684.57	18845.2		1684.57	31649.9		1684.57	28375.9		1684.57	13337.6		1684.57	31608.9		1684.57	30182.3		1684.57	18715.1		1684.57	23861.2		1684.57	11429.7		1684.57	27323.3		1684.57
1686.22	25944.4	1.40659		1686.22	23805.9		1686.22	13522.4		1686.22	24762.5		1686.22	19060.5		1686.22	24355.7		1686.22	18850.2		1686.22	31649.9		1686.22	28484.9		1686.22	13324.8		1686.22	31608.9		1686.22	30248.8		1686.22	18718.9		1686.22	23866.5		1686.22	11408.9		1686.22	27392.2		1686.22
1687.87	25969.4	1.40794		1687.87	23844.6		1687.87	13494.4		1687.87	24757.3		1687.87	18999.5		1687.87	24369.2		1687.87	18880.9		1687.87	31649.9		1687.87	28546.1		1687.87	13379.5		1687.87	31608.9		1687.87	30287.2		1687.87	18733.1		1687.87	23973.2		1687.87	11419.5		1687.87	27401.6		1687.87
1689.51	25945.1	1.40662		1689.51	23870.7		1689.51	13536.3		1689.51	24826.4		1689.51	19083.3		1689.51	24386.5		1689.51	18924.2		1689.51	31649.9		1689.51	28479		1689.51	13384.2		1689.51	31608.9		1689.51	30254.6		1689.51	18710.8		1689.51	23988.2		1689.51	11388		1689.51	27413.4		1689.51
1691.16	26015.6	1.41044		1691.16	23894.8		1691.16	13545.3		1691.16	24830.3		1691.16	19052.8		1691.16	24487.9		1691.16	18863.8		1691.16	31649.9		1691.16	28561.3		1691.16	13343.7		1691.16	31608.9		1691.16	30310.9		1691.16	18745.9		1691.16	23960.6		1691.16	11377.7		1691.16	27372.7		1691.16
1692.81	25993.2	1.40923		1692.81	23837.6		1692.81	13528.1		1692.81	24825.6		1692.81	19064.2		1692.81	24434.8		1692.81	18934.9		1692.81	31649.9		1692.81	28521.9		1692.81	13392.1		1692.81	31608.9		1692.81	30295.2		1692.81	18774.8		1692.81	24033.2		1692.81	11407.2		1692.81	27448.1		1692.81
1694.45	26107.8	1.41544		1694.45	23859.4		1694.45	13501.2		1694.45	24844.1		1694.45	19106.5		1694.45	24490.5		1694.45	18960.7		1694.45	31649.9		1694.45	28550		1694.45	13405.5		1694.45	31608.9		1694.45	30297		1694.45	18812		1694.45	24024.1		1694.45	11471.1		1694.45	27475.3		1694.45
1696.1	26058.1	1.41275		1696.1	23891.3		1696.1	13553		1696.1	24845.8		1696.1	19123.9		1696.1	24507.2		1696.1	18963		1696.1	31649.9		1696.1	28500.7		1696.1	13422.5		1696.1	31608.9		1696.1	30352		1696.1	18816.5		1696.1	24019.7		1696.1	11416.8		1696.1	27540.2		1696.1
1697.74	26047.7	1.41219		1697.74	23898.5		1697.74	13552.2		1697.74	24840.6		1697.74	19162.5		1697.74	24503		1697.74	18946.9		1697.74	31649.9		1697.74	28581		1697.74	13433.3		1697.74	31608.9		1697.74	30337		1697.74	18786.1		1697.74	24039		1697.74	11456.6		1697.74	27513.8		1697.74
1699.39	26151.8	1.41783		1699.39	23818.5		1699.39	13539		1699.39	24866.6		1699.39	19088.6		1699.39	24508.5		1699.39	18962.1		1699.39	31649.9		1699.39	28688.7		1699.39	13402.4		1699.39	31608.9		1699.39	30346.7		1699.39	18831.4		1699.39	24038.5		1699.39	11469.7		1699.39	27456.1		1699.39
1701.03	26112.9	1.41572		1701.03	23940.3		1701.03	13571.9		1701.03	24863.5		1701.03	19151.4		1701.03	24537		1701.03	18993		1701.03	31649.9		1701.03	28611.6		1701.03	13441.1		1701.03	31608.9		1701.03	30347.6		1701.03	18828		1701.03	24006.9		1701.03	11473.6		1701.03	27525.6		1701.03
1702.68	26058.3	1.41276		1702.68	23992		1702.68	13566		1702.68	24923		1702.68	19131.2		1702.68	24561.6		1702.68	18985.2		1702.68	31649.9		1702.68	28639.7		1702.68	13435.6		1702.68	31608.9		1702.68	30378.2		1702.68	18816.7		1702.68	24058.2		1702.68	11514		1702.68	27519.5		1702.68
1704.32	26150.3	1.41775		1704.32	23973.3		1704.32	13572.1		1704.32	24943.3		1704.32	19206.1		1704.32	24566.1		1704.32	19035.9		1704.32	31649.9		1704.32	28653.9		1704.32	13464.6		1704.32	31608.9		1704.32	30413.6		1704.32	18818		1704.32	24097.1		1704.32	11511.4		1704.32	27547.1		1704.32
1705.96	26130.2	1.41666		1705.96	23976.8		1705.96	13635.2		1705.96	24944.3		1705.96	19118.3		1705.96	24602.2		1705.96	18978.6		1705.96	31649.9		1705.96	28697.3		1705.96	13489		1705.96	31608.9		1705.96	30388.1		1705.96	18855.3		1705.96	24057.7		1705.96	11512.7		1705.96	27612.7		1705.96
1707.61	26183.1	1.41952		1707.61	24042.2		1707.61	13615.1		1707.61	25025.1		1707.61	19226.9		1707.61	24593.8		1707.61	19029.4		1707.61	31649.9		1707.61	28723.2		1707.61	13497.3		1707.61	31608.9		1707.61	30417.6		1707.61	18882.3		1707.61	24168		1707.61	11551.2		1707.61	27615.8		1707.61
1709.25	26224.3	1.42176		1709.25	24053.8		1709.25	13607.1		1709.25	24989.9		1709.25	19197.2		1709.25	24678.5		1709.25	19065.5		1709.25	31649.9		1709.25	28840.3		1709.25	13481.6		1709.25	31608.9		1709.25	30437.8		1709.25	18886.8		1709.25	24165.9		1709.25	11522.4		1709.25	27698		1709.25
1710.89	26204	1.42066		1710.89	24090.5		1710.89	13591.9		1710.89	25038.2		1710.89	19232.2		1710.89	24608.3		1710.89	19098.5		1710.89	31649.9		1710.89	28749.1		1710.89	13499.5		1710.89	31608.9		1710.89	30474.8		1710.89	18924.3		1710.89	24177.4		1710.89	11537		1710.89	27668.9		1710.89
1712.53	26203.6	1.42064		1712.53	24052.4		1712.53	13589.3		1712.53	25040.1		1712.53	19269.3		1712.53	24697.2		1712.53	19122.6		1712.53	31649.9		1712.53	28724.7		1712.53	13512.6		1712.53	31608.9		1712.53	30437.8		1712.53	18897		1712.53	24172.2		1712.53	11538.8		1712.53	27689.8		1712.53
1714.18	26190.9	1.41995		1714.18	24036.6		1714.18	13588		1714.18	24928.6		1714.18	19217.8		1714.18	24601.1		1714.18	19055.5		1714.18	31649.9		1714.18	28739.6		1714.18	13472.6		1714.18	31608.9		1714.18	30453.2		1714.18	18874.9		1714.18	24137.9		1714.18	11472.6		1714.18	27579.6		1714.18
1715.82	26148.8	1.41766		1715.82	24011.7		1715.82	13550.3		1715.82	24928.4		1715.82	19149.1		1715.82	24595.2		1715.82	19004		1715.82	31649.9		1715.82	28758.7		1715.82	13430.4		1715.82	31608.9		1715.82	30424.3		1715.82	18776.6		1715.82	24097.2		1715.82	11479.8		1715.82	27568.3		1715.82
1717.46	26249.8	1.42314		1717.46	24084.7		1717.46	13646.2		1717.46	25091.8		1717.46	19269.1		1717.46	24672.1		1717.46	19091.1		1717.46	31649.9		1717.46	28807.4		1717.46	13504.4		1717.46	31608.9		1717.46	30526		1717.46	18915.6		1717.46	24215.7		1717.46	11595.3		1717.46	27735.4		1717.46
1719.1	26231.4	1.42214		1719.1	24162.5		1719.1	13619.7		1719.1	25084.7		1719.1	19251		1719.1	24678.3		1719.1	19135.7		1719.1	31649.9		1719.1	28774.1		1719.1	13494		1719.1	31608.9		1719.1	30527.4		1719.1	18910.2		1719.1	24215		1719.1	11565.1		1719.1	27752.9		1719.1
1720.74	26304.3	1.4261		1720.74	24138.4		1720.74	13656.3		1720.74	25105.2		1720.74	19310		1720.74	24737		1720.74	19119.1		1720.74	31649.9		1720.74	28856.5		1720.74	13546.3		1720.74	31608.9		1720.74	30535.9		1720.74	18960.9		1720.74	24280.8		1720.74	11586.8		1720.74	27760.5		1720.74
1722.38	26325.3	1.42724		1722.38	24238.2		1722.38	13661.3		1722.38	25106.2		1722.38	19294.5		1722.38	24764.2		1722.38	19177.6		1722.38	31649.9		1722.38	28905.4		1722.38	13542.3		1722.38	31608.9		1722.38	30561.7		1722.38	18937.1		1722.38	24309.8		1722.38	11586.3		1722.38	27795		1722.38
1724.02	26364.5	1.42936		1724.02	24186.3		1724.02	13651.6		1724.02	25158.3		1724.02	19329.8		1724.02	24763.7		1724.02	19189.5		1724.02	31649.9		1724.02	28941.9		1724.02	13558.1		1724.02	31608.9		1724.02	30598.9		1724.02	19004.3		1724.02	24285.9		1724.02	11591.6		1724.02	27829.8		1724.02
1725.66	26307.2	1.42625		1725.66	24233		1725.66	13656		1725.66	25133.2		1725.66	19307.4		1725.66	24775.5		1725.66	19146.9		1725.66	31649.9		1725.66	28886.4		1725.66	13564.1		1725.66	31608.9		1725.66	30528.2		1725.66	18990.7		1725.66	24287.7		1725.66	11576.8		1725.66	27826.8		1725.66
1727.3	26373.2	1.42983		1727.3	24190.3		1727.3	13700.5		1727.3	25138.7		1727.3	19317.7		1727.3	24766.1		1727.3	19200.7		1727.3	31649.9		1727.3	28917		1727.3	13580.2		1727.3	31608.9		1727.3	30577.9		1727.3	18979		1727.3	24251.4		1727.3	11632.7		1727.3	27855.1		1727.3
1728.94	26426.8	1.43274		1728.94	24191.3		1728.94	13683.7		1728.94	25171.6		1728.94	19322.8		1728.94	24765.4		1728.94	19250.3		1728.94	31649.9		1728.94	28927.6		1728.94	13579.5		1728.94	31608.9		1728.94	30558.5		1728.94	19031		1728.94	24355.6		1728.94	11621.2		1728.94	27850.7		1728.94
1730.58	26371.1	1.42972		1730.58	24244.8		1730.58	13692.3		1730.58	25145.1		1730.58	19340.9		1730.58	24830.5		1730.58	19210.4		1730.58	31649.9		1730.58	28974.3		1730.58	13603.4		1730.58	31608.9		1730.58	30596.7		1730.58	19034		1730.58	24396		1730.58	11576.7		1730.58	27859.1		1730.58
1732.22	26383.3	1.43038		1732.22	24207.4		1732.22	13699.8		1732.22	25218.6		1732.22	19351.6		1732.22	24832.2		1732.22	19252.2		1732.22	31649.9		1732.22	29004.6		1732.22	13549.1		1732.22	31608.9		1732.22	30540.8		1732.22	19019.1		1732.22	24336.7		1732.22	11609.6		1732.22	27857.2		1732.22
1733.86	26434.6	1.43316		1733.86	24272.6		1733.86	13713.1		1733.86	25218.2		1733.86	19347.3		1733.86	24832.6		1733.86	19283.3		1733.86	31649.9		1733.86	28993.1		1733.86	13558.2		1733.86	31608.9		1733.86	30600.2		1733.86	19028.3		1733.86	24337.2		1733.86	11596.5		1733.86	27842.5		1733.86
1735.49	26522.2	1.43791		1735.49	24340.1		1735.49	13745.9		1735.49	25269.7		1735.49	19349.3		1735.49	24833.1		1735.49	19247.1		1735.49	31649.9		1735.49	29012.1		1735.49	13613.5		1735.49	31608.9		1735.49	30609.4		1735.49	19055.7		1735.49	24432.5		1735.49	11639		1735.49	27883.1		1735.49
1737.13	26511.7	1.43734		1737.13	24276.8		1737.13	13744.9		1737.13	25278.6		1737.13	19384.7		1737.13	24880.4		1737.13	19293.2		1737.13	31649.9		1737.13	29080.1		1737.13	13619.4		1737.13	31608.9		1737.13	30668.4		1737.13	19117.6		1737.13	24474.6		1737.13	11643		1737.13	27992		1737.13
1738.77	26454.9	1.43426		1738.77	24319.3		1738.77	13753.6		1738.77	25287.7		1738.77	19471.2		1738.77	24895		1738.77	19264.6		1738.77	31649.9		1738.77	29092.4		1738.77	13638.4		1738.77	31608.9		1738.77	30633.5		1738.77	19100.5		1738.77	24365.1		1738.77	11600.6		1738.77	27968.2		1738.77
1740.41	26497.2	1.43655		1740.41	24347.1		1740.41	13746		1740.41	25295.9		1740.41	19417.1		1740.41	24890.6		1740.41	19313.3		1740.41	31649.9		1740.41	29127.2		1740.41	13664.3		1740.41	31608.9		1740.41	30625.1		1740.41	19092		1740.41	24387.8		1740.41	11646.6		1740.41	27952.2		1740.41
1742.04	26515.4	1.43754		1742.04	24370.1		1742.04	13746.9		1742.04	25274		1742.04	19434.7		1742.04	24898.7		1742.04	19294.5		1742.04	31649.9		1742.04	29114.4		1742.04	13641.3		1742.04	31608.9		1742.04	30651.2		1742.04	19095		1742.04	24434.5		1742.04	11675.4		1742.04	27944.8		1742.04
1743.68	26523.9	1.438		1743.68	24352.7		1743.68	13731.6		1743.68	25302.2		1743.68	19391.7		1743.68	24844.4		1743.68	19305.7		1743.68	31649.9		1743.68	29050.1		1743.68	13658.1		1743.68	31608.9		1743.68	30629.9		1743.68	19137.7		1743.68	24408.9		1743.68	11627.4		1743.68	27991.1		1743.68
1745.31	26498.2	1.43661		1745.31	24322.2		1745.31	13734.4		1745.31	25325.5		1745.31	19421.3		1745.31	24915.5		1745.31	19287		1745.31	31649.9		1745.31	29075.4		1745.31	13653.2		1745.31	31608.9		1745.31	30654.6		1745.31	19067.8		1745.31	24399.2		1745.31	11657		1745.31	27981.4		1745.31
1746.95	26640.9	1.44435		1746.95	24407.6		1746.95	13780.7		1746.95	25255.9		1746.95	19404.7		1746.95	24918.2		1746.95	19308.6		1746.95	31649.9		1746.95	29120.8		1746.95	13664.7		1746.95	31608.9		1746.95	30665.5		1746.95	19146		1746.95	24470.4		1746.95	11655		1746.95	27981.2		1746.95
1748.58	26536	1.43865		1748.58	24373.5		1748.58	13786.2		1748.58	25357.8		1748.58	19452.4		1748.58	24989.2		1748.58	19349.2		1748.58	31649.9		1748.58	29166.9		1748.58	13658.4		1748.58	31608.9		1748.58	30736		1748.58	19135.9		1748.58	24454.4		1748.58	11682.1		1748.58	28065.8		1748.58
1750.22	26602.3	1.44225		1750.22	24433.3		1750.22	13779.6		1750.22	25307.8		1750.22	19441.9		1750.22	24973.5		1750.22	19336.5		1750.22	31649.9		1750.22	29133.8		1750.22	13740.2		1750.22	31608.9		1750.22	30715.1		1750.22	19202.1		1750.22	24531.9		1750.22	11662.9		1750.22	28082.9		1750.22
1751.85	26649.6	1.44481		1751.85	24451.7		1751.85	13744.8		1751.85	25407.3		1751.85	19501.9		1751.85	24923.5		1751.85	19314.3		1751.85	31649.9		1751.85	29206.7		1751.85	13734.9		1751.85	31608.9		1751.85	30739.8		1751.85	19115.7		1751.85	24549.3		1751.85	11683		1751.85	28146.3		1751.85
1753.49	26705.5	1.44785		1753.49	24471.5		1753.49	13798.1		1753.49	25421.4		1753.49	19458.9		1753.49	25042.7		1753.49	19371		1753.49	31649.9		1753.49	29252.8		1753.49	13727.4		1753.49	31608.9		1753.49	30695.7		1753.49	19146.6		1753.49	24471.5		1753.49	11694.3		1753.49	28071.4		1753.49
1755.12	26659.4	1.44535		1755.12	24443		1755.12	13801		1755.12	25418.7		1755.12	19466.5		1755.12	24987.1		1755.12	19377		1755.12	31649.9		1755.12	29232.5		1755.12	13709.5		1755.12	31608.9		1755.12	30752.1		1755.12	19199.9		1755.12	24559.3		1755.12	11692.2		1755.12	28094.7		1755.12
1756.76	26711.8	1.44819		1756.76	24435.4		1756.76	13784.1		1756.76	25449.4		1756.76	19507.8		1756.76	25051.7		1756.76	19415.6		1756.76	31649.9		1756.76	29275.1		1756.76	13745.3		1756.76	31608.9		1756.76	30746.1		1756.76	19174.6		1756.76	24578.4		1756.76	11683.1		1756.76	28139.3		1756.76
1758.39	26602.5	1.44226		1758.39	24466.6		1758.39	13811.8		1758.39	25405.2		1758.39	19543		1758.39	25027.8		1758.39	19439.2		1758.39	31649.9		1758.39	29215.6		1758.39	13741		1758.39	31608.9		1758.39	30776.7		1758.39	19211		1758.39	24510.1		1758.39	11731.3		1758.39	28060.4		1758.39
1760.02	26664.6	1.44563		1760.02	24506.6		1760.02	13822.8		1760.02	25427.1		1760.02	19576.7		1760.02	24965		1760.02	19442		1760.02	31649.9		1760.02	29337		1760.02	13720.1		1760.02	31608.9		1760.02	30703.9		1760.02	19183.9		1760.02	24507.3		1760.02	11673.8		1760.02	28124.1		1760.02
1761.66	26711.4	1.44817		1761.66	24479.1		1761.66	13836.3		1761.66	25464.3		1761.66	19563.8		1761.66	25041.6		1761.66	19403.4		1761.66	31649.9		1761.66	29261.4		1761.66	13745.7		1761.66	31608.9		1761.66	30747.4		1761.66	19248.6		1761.66	24568.5		1761.66	11731.8		1761.66	28203.4		1761.66
1763.29	26743	1.44988		1763.29	24467.7		1763.29	13844.4		1763.29	25405.9		1763.29	19502.4		1763.29	25053		1763.29	19431.4		1763.29	31649.9		1763.29	29282.7		1763.29	13733.3		1763.29	31608.9		1763.29	30768.7		1763.29	19288		1763.29	24588		1763.29	11731.3		1763.29	28124.7		1763.29
1764.92	26739.4	1.44969		1764.92	24523.3		1764.92	13821.4		1764.92	25490.1		1764.92	19577.4		1764.92	25025.3		1764.92	19446.8		1764.92	31649.9		1764.92	29327.8		1764.92	13748		1764.92	31608.9		1764.92	30780.8		1764.92	19258.8		1764.92	24570.9		1764.92	11696.4		1764.92	28134.5		1764.92
1766.55	26800.2	1.45298		1766.55	24499.9		1766.55	13822.5		1766.55	25509.1		1766.55	19546.6		1766.55	25038.5		1766.55	19464.6		1766.55	31649.9		1766.55	29308.4		1766.55	13769.3		1766.55	31608.9		1766.55	30779		1766.55	19270.7		1766.55	24615.7		1766.55	11725.1		1766.55	28229.4		1766.55
1768.18	26777.2	1.45174		1768.18	24515.5		1768.18	13822.2		1768.18	25454		1768.18	19506.1		1768.18	25016.3		1768.18	19471.3		1768.18	31649.9		1768.18	29338.4		1768.18	13755.5		1768.18	31608.9		1768.18	30857.9		1768.18	19287		1768.18	24663.3		1768.18	11767.3		1768.18	28224.2		1768.18
1769.81	26823.9	1.45427		1769.81	24582.4		1769.81	13862.4		1769.81	25526.4		1769.81	19599.1		1769.81	25106.1		1769.81	19483.9		1769.81	31649.9		1769.81	29354.6		1769.81	13774.6		1769.81	31608.9		1769.81	30775.3		1769.81	19297.3		1769.81	24679.4		1769.81	11746.7		1769.81	28278.3		1769.81
1771.44	26833.6	1.45479		1771.44	24567.6		1771.44	13880.6		1771.44	25471.7		1771.44	19559.5		1771.44	25127		1771.44	19509.6		1771.44	31649.9		1771.44	29384.5		1771.44	13775.6		1771.44	31608.9		1771.44	30803.9		1771.44	19287.9		1771.44	24647.3		1771.44	11762.6		1771.44	28253.5		1771.44
1773.08	26754.2	1.45049		1773.08	24623.1		1773.08	13860		1773.08	25477		1773.08	19597		1773.08	25125.4		1773.08	19515.3		1773.08	31649.9		1773.08	29363.2		1773.08	13763.9		1773.08	31608.9		1773.08	30829		1773.08	19278.4		1773.08	24649.4		1773.08	11742.8		1773.08	28275.4		1773.08
1774.7	26774.3	1.45158		1774.7	24565.4		1774.7	13851.8		1774.7	25554.8		1774.7	19640.4		1774.7	25202		1774.7	19505.1		1774.7	31649.9		1774.7	29357.4		1774.7	13811.8		1774.7	31608.9		1774.7	30841.9		1774.7	19296.4		1774.7	24663.9		1774.7	11748.1		1774.7	28266.8		1774.7
1776.33	26839.3	1.4551		1776.33	24577.7		1776.33	13904.7		1776.33	25591.5		1776.33	19613.1		1776.33	25193.2		1776.33	19572.9		1776.33	31649.9		1776.33	29358		1776.33	13834.8		1776.33	31608.9		1776.33	30814.8		1776.33	19324.8		1776.33	24704.4		1776.33	11826.7		1776.33	28300.2		1776.33
1777.96	26826.4	1.4544		1777.96	24620.9		1777.96	13905.7		1777.96	25612.4		1777.96	19660.2		1777.96	25252.8		1777.96	19518.6		1777.96	31649.9		1777.96	29463.1		1777.96	13819.5		1777.96	31608.9		1777.96	30840.6		1777.96	19319.1		1777.96	24789.6		1777.96	11808.6		1777.96	28341.3		1777.96
1779.59	26850.7	1.45572		1779.59	24574.5		1779.59	13916.2		1779.59	25571.9		1779.59	19665.7		1779.59	25143.8		1779.59	19478		1779.59	31649.9		1779.59	29492.6		1779.59	13841.5		1779.59	31608.9		1779.59	30839.5		1779.59	19322.2		1779.59	24709.1		1779.59	11776		1779.59	28358.8		1779.59
1781.22	26886.9	1.45768		1781.22	24658.3		1781.22	13942.6		1781.22	25591.2		1781.22	19632.1		1781.22	25182.2		1781.22	19570.4		1781.22	31649.9		1781.22	29453.1		1781.22	13850.2		1781.22	31608.9		1781.22	30889.1		1781.22	19342.6		1781.22	24726.4		1781.22	11762.1		1781.22	28378.6		1781.22
1782.85	26840.8	1.45518		1782.85	24634.7		1782.85	13919		1782.85	25600.2		1782.85	19644.9		1782.85	25186.6		1782.85	19576.3		1782.85	31649.9		1782.85	29431.1		1782.85	13840.2		1782.85	31608.9		1782.85	30861.4		1782.85	19347		1782.85	24723.2		1782.85	11782.8		1782.85	28361.9		1782.85
1784.48	26913.6	1.45913		1784.48	24701.6		1784.48	13949.5		1784.48	25637.3		1784.48	19683.5		1784.48	25240.4		1784.48	19586.3		1784.48	31649.9		1784.48	29574.8		1784.48	13840.2		1784.48	31608.9		1784.48	30858.8		1784.48	19413		1784.48	24876.8		1784.48	11821.3		1784.48	28379.6		1784.48
1786.11	26942.2	1.46068		1786.11	24753.1		1786.11	13947.3		1786.11	25709.3		1786.11	19696.6		1786.11	25245		1786.11	19582.6		1786.11	31649.9		1786.11	29520.8		1786.11	13876.3		1786.11	31608.9		1786.11	30923		1786.11	19381.9		1786.11	24717.1		1786.11	11804.1		1786.11	28451		1786.11
1787.73	26970.5	1.46222		1787.73	24726.7		1787.73	13940.4		1787.73	25731.8		1787.73	19662.6		1787.73	25307.6		1787.73	19668.9		1787.73	31649.9		1787.73	29511.7		1787.73	13911.7		1787.73	31608.9		1787.73	30903.3		1787.73	19398.1		1787.73	24809.2		1787.73	11828.1		1787.73	28453.5		1787.73
1789.36	26908.1	1.45883		1789.36	24695.6		1789.36	13954.3		1789.36	25694.1		1789.36	19716.9		1789.36	25316.3		1789.36	19613.5		1789.36	31649.9		1789.36	29618.9		1789.36	13880.9		1789.36	31608.9		1789.36	30922		1789.36	19417		1789.36	24844.2		1789.36	11815.2		1789.36	28485.9		1789.36
1790.99	26979.9	1.46272		1790.99	24858.3		1790.99	13970.9		1790.99	25723.4		1790.99	19751.3		1790.99	25350.9		1790.99	19628.9		1790.99	31649.9		1790.99	29523.2		1790.99	13878.9		1790.99	31608.9		1790.99	30919.8		1790.99	19424		1790.99	24850.7		1790.99	11840.6		1790.99	28444.8		1790.99
1792.61	26909.7	1.45892		1792.61	24779.3		1792.61	13978.9		1792.61	25695.1		1792.61	19766.4		1792.61	25296.5		1792.61	19689.7		1792.61	31649.9		1792.61	29584.7		1792.61	13895.2		1792.61	31608.9		1792.61	30948.3		1792.61	19448.9		1792.61	24863.8		1792.61	11843.4		1792.61	28484.2		1792.61
1794.24	26985.2	1.46301		1794.24	24798.3		1794.24	13987.1		1794.24	25773.8		1794.24	19719.1		1794.24	25370.5		1794.24	19658.5		1794.24	31649.9		1794.24	29569.4		1794.24	13912		1794.24	31608.9		1794.24	30960.2		1794.24	19441		1794.24	24849.3		1794.24	11833.9		1794.24	28487.3		1794.24
1795.87	27027.1	1.46528		1795.87	24844.4		1795.87	14021.3		1795.87	25733.5		1795.87	19774.5		1795.87	25357.2		1795.87	19690.5		1795.87	31649.9		1795.87	29539.8		1795.87	13886.7		1795.87	31608.9		1795.87	30932		1795.87	19505.8		1795.87	24878.7		1795.87	11868.8		1795.87	28517.9		1795.87
1797.49	26926.1	1.4598		1797.49	24811.3		1797.49	13989.7		1797.49	25782.2		1797.49	19809.4		1797.49	25336.7		1797.49	19658.4		1797.49	31649.9		1797.49	29618		1797.49	13930.8		1797.49	31608.9		1797.49	30949.7		1797.49	19438.6		1797.49	24889.9		1797.49	11886.6		1797.49	28577.9		1797.49
1799.12	27046	1.46631		1799.12	24805.2		1799.12	14024.6		1799.12	25772.4		1799.12	19759		1799.12	25328.4		1799.12	19662.1		1799.12	31649.9		1799.12	29698		1799.12	13953.4		1799.12	31608.9		1799.12	30939.5		1799.12	19486		1799.12	24911.2		1799.12	11855.9		1799.12	28595.5		1799.12
1800.74	27053.8	1.46673		1800.74	24921.6		1800.74	14014.1		1800.74	25837.6		1800.74	19803.8		1800.74	25449.6		1800.74	19704.4		1800.74	31649.9		1800.74	29684.4		1800.74	13962		1800.74	31608.9		1800.74	30968.6		1800.74	19533.6		1800.74	24955.6		1800.74	11934.8		1800.74	28618.1		1800.74
1802.37	27093.1	1.46886		1802.37	24850.8		1802.37	13972.8		1802.37	25843.8		1802.37	19811.5		1802.37	25423.6		1802.37	19706		1802.37	31649.9		1802.37	29660.3		1802.37	13955.9		1802.37	31608.9		1802.37	30969.5		1802.37	19526.8		1802.37	24916.5		1802.37	11902.1		1802.37	28633.5		1802.37
1803.99	27018.6	1.46482		1803.99	24840.3		1803.99	14046.1		1803.99	25798.2		1803.99	19808.6		1803.99	25376		1803.99	19701		1803.99	31649.9		1803.99	29719.5		1803.99	13954.6		1803.99	31608.9		1803.99	30998.9		1803.99	19499.4		1803.99	24932.8		1803.99	11897.2		1803.99	28653.7		1803.99
1805.62	27062.6	1.46721		1805.62	24887.5		1805.62	14001.7		1805.62	25848.4		1805.62	19834.6		1805.62	25445.7		1805.62	19697.9		1805.62	31649.9		1805.62	29692.9		1805.62	13994.9		1805.62	31608.9		1805.62	31017.3		1805.62	19494.3		1805.62	24837.6		1805.62	11909.1		1805.62	28650.2		1805.62
1807.24	27078.3	1.46806		1807.24	24931.3		1807.24	14064.3		1807.24	25883.7		1807.24	19875.4		1807.24	25471.5		1807.24	19818.4		1807.24	31649.9		1807.24	29710.4		1807.24	14013.6		1807.24	31608.9		1807.24	30973.6		1807.24	19497.6		1807.24	24941.8		1807.24	11898		1807.24	28705.1		1807.24
1808.86	27134.9	1.47113		1808.86	24902.8		1808.86	14051.1		1808.86	25832		1808.86	19851.4		1808.86	25470.4		1808.86	19735.3		1808.86	31649.9		1808.86	29757.7		1808.86	13983.9		1808.86	31608.9		1808.86	30985.7		1808.86	19550.4		1808.86	24899.9		1808.86	11950.4		1808.86	28631.7		1808.86
1810.49	27178.5	1.47349		1810.49	24918.3		1810.49	14084.8		1810.49	25898.5		1810.49	19912.1		1810.49	25440		1810.49	19758.9		1810.49	31649.9		1810.49	29716.9		1810.49	13987.5		1810.49	31608.9		1810.49	31027.3		1810.49	19554		1810.49	24997.9		1810.49	11900.4		1810.49	28651.1		1810.49
1812.11	27105.2	1.46952		1812.11	24871.7		1812.11	14040.8		1812.11	25854.4		1812.11	19885		1812.11	25456.1		1812.11	19786.5		1812.11	31649.9		1812.11	29685.3		1812.11	13972.3		1812.11	31608.9		1812.11	31026.8		1812.11	19547.5		1812.11	24962.8		1812.11	11889.6		1812.11	28620.7		1812.11
1813.73	27179.1	1.47352		1813.73	24949		1813.73	14082.7		1813.73	25957.1		1813.73	19902.9		1813.73	25548.2		1813.73	19796.9		1813.73	31649.9		1813.73	29737		1813.73	13999.4		1813.73	31608.9		1813.73	31022.8		1813.73	19578.2		1813.73	25064.7		1813.73	11957.1		1813.73	28745.1		1813.73
1815.35	27197.8	1.47453		1815.35	25031.8		1815.35	14079		1815.35	25980.4		1815.35	19897.6		1815.35	25576.9		1815.35	19842.1		1815.35	31649.9		1815.35	29863.2		1815.35	14026.9		1815.35	31608.9		1815.35	31041.5		1815.35	19600.1		1815.35	25061.6		1815.35	11995.9		1815.35	28787.4		1815.35
1816.98	27242.4	1.47696		1816.98	24991.2		1816.98	14105.1		1816.98	25947.6		1816.98	19931.2		1816.98	25530.7		1816.98	19878.6		1816.98	31649.9		1816.98	29805.8		1816.98	14018.1		1816.98	31608.9		1816.98	30970.7		1816.98	19696.4		1816.98	25045.8		1816.98	11964.3		1816.98	28792.1		1816.98
1818.6	27266.4	1.47826		1818.6	25000		1818.6	14063.4		1818.6	25960.1		1818.6	19991.5		1818.6	25555.2		1818.6	19819.8		1818.6	31649.9		1818.6	29822.7		1818.6	14045.2		1818.6	31608.9		1818.6	31039.1		1818.6	19644		1818.6	24996.1		1818.6	11943		1818.6	28829.8		1818.6
1820.22	27310.9	1.48067		1820.22	25016.1		1820.22	14131.3		1820.22	26029.8		1820.22	19939.2		1820.22	25528.5		1820.22	19881.4		1820.22	31649.9		1820.22	29885.4		1820.22	14034.3		1820.22	31608.9		1820.22	31054		1820.22	19621.5		1820.22	25074.2		1820.22	11957.7		1820.22	28814.5		1820.22
1821.84	27296.2	1.47987		1821.84	24990.8		1821.84	14137.9		1821.84	26001.8		1821.84	19944.9		1821.84	25604.5		1821.84	19904.8		1821.84	31649.9		1821.84	29904.8		1821.84	14031.3		1821.84	31608.9		1821.84	31060.8		1821.84	19643.8		1821.84	25119.8		1821.84	11972.7		1821.84	28878		1821.84
1823.46	27244	1.47704		1823.46	25026.9		1823.46	14101.1		1823.46	25999.4		1823.46	19924.3		1823.46	25618.5		1823.46	19869.9		1823.46	31649.9		1823.46	29887.4		1823.46	14099.4		1823.46	31608.9		1823.46	31067.4		1823.46	19692.5		1823.46	25060.6		1823.46	11981.4		1823.46	28838.1		1823.46
1825.08	27294	1.47975		1825.08	25060.7		1825.08	14138.3		1825.08	26081.4		1825.08	19986.5		1825.08	25615.9		1825.08	19899.7		1825.08	31649.9		1825.08	29881.7		1825.08	14081.6		1825.08	31608.9		1825.08	31059.8		1825.08	19639.5		1825.08	25102.9		1825.08	12038		1825.08	28892.2		1825.08
1826.7	27283.9	1.4792		1826.7	25066.1		1826.7	14122.2		1826.7	26064.8		1826.7	19996.7		1826.7	25592.4		1826.7	19863.5		1826.7	31649.9		1826.7	29932.9		1826.7	14056.8		1826.7	31608.9		1826.7	31054.5		1826.7	19661.5		1826.7	25161.4		1826.7	12039.1		1826.7	28887.9		1826.7
1828.32	27322.6	1.4813		1828.32	25084.4		1828.32	14150.7		1828.32	26085.7		1828.32	19983.9		1828.32	25681.8		1828.32	19860.8		1828.32	31649.9		1828.32	29859.2		1828.32	14117.2		1828.32	31608.9		1828.32	31069.9		1828.32	19678.9		1828.32	25201.2		1828.32	12013.6		1828.32	28919.4		1828.32
1829.94	27385	1.48469		1829.94	25081.3		1829.94	14222.6		1829.94	26084.6		1829.94	19992.1		1829.94	25667.3		1829.94	19958.1		1829.94	31649.9		1829.94	29852.1		1829.94	14093.3		1829.94	31608.9		1829.94	31101.5		1829.94	19725.1		1829.94	25113		1829.94	12006.4		1829.94	28914.3		1829.94
1831.56	27340.1	1.48225		1831.56	25043.9		1831.56	14192		1831.56	26076.8		1831.56	19992.8		1831.56	25656.9		1831.56	19925.4		1831.56	31649.9		1831.56	29933.3		1831.56	14098		1831.56	31608.9		1831.56	31103.6		1831.56	19728.7		1831.56	25220		1831.56	12041.7		1831.56	28973		1831.56
1833.18	27335.7	1.48201		1833.18	25125.5		1833.18	14197.9		1833.18	26204		1833.18	20004.4		1833.18	25701.8		1833.18	19938.3		1833.18	31649.9		1833.18	30000.1		1833.18	14130.3		1833.18	31608.9		1833.18	31119.5		1833.18	19763.5		1833.18	25172		1833.18	12041.2		1833.18	28944.1		1833.18
1834.8	27336.8	1.48207		1834.8	25150.6		1834.8	14151.9		1834.8	26132.1		1834.8	20060.1		1834.8	25700.7		1834.8	19932.5		1834.8	31649.9		1834.8	29982		1834.8	14166.4		1834.8	31608.9		1834.8	31083.8		1834.8	19714.7		1834.8	25197.9		1834.8	12046.1		1834.8	28982.5		1834.8
1836.42	27402.3	1.48562		1836.42	25160.4		1836.42	14202.1		1836.42	26203		1836.42	20032.5		1836.42	25725.7		1836.42	19965.3		1836.42	31649.9		1836.42	30056.4		1836.42	14149.5		1836.42	31608.9		1836.42	31102.9		1836.42	19747.4		1836.42	25187.4		1836.42	12036.3		1836.42	29000.6		1836.42
1838.03	27489.2	1.49034		1838.03	25154		1838.03	14243.6		1838.03	26175.1		1838.03	20086.9		1838.03	25707.7		1838.03	19997.7		1838.03	31649.9		1838.03	30011.7		1838.03	14148.8		1838.03	31608.9		1838.03	31171.1		1838.03	19753.6		1838.03	25255		1838.03	12038.4		1838.03	29040.3		1838.03
1839.65	27440.5	1.4877		1839.65	25249.7		1839.65	14227.4		1839.65	26213.2		1839.65	20096		1839.65	25799		1839.65	20023.2		1839.65	31649.9		1839.65	30074.6		1839.65	14200.2		1839.65	31608.9		1839.65	31135.5		1839.65	19791.5		1839.65	25302.5		1839.65	12096.8		1839.65	29048.2		1839.65
1841.27	27405.7	1.48581		1841.27	25149.6		1841.27	14216		1841.27	26221.3		1841.27	20097.6		1841.27	25787.8		1841.27	20002.2		1841.27	31649.9		1841.27	30047.1		1841.27	14207.3		1841.27	31608.9		1841.27	31143.9		1841.27	19782.4		1841.27	25231.8		1841.27	12073.1		1841.27	29061.9		1841.27
1842.89	27409.4	1.48601		1842.89	25305.2		1842.89	14247.3		1842.89	26267.1		1842.89	20133.7		1842.89	25863.8		1842.89	20033.7		1842.89	31649.9		1842.89	30079.7		1842.89	14191.5		1842.89	31608.9		1842.89	31122.8		1842.89	19853.5		1842.89	25327.2		1842.89	12103.5		1842.89	29063.7		1842.89
1844.5	27505.2	1.4912		1844.5	25291.2		1844.5	14282		1844.5	26330.2		1844.5	20165.7		1844.5	25867.6		1844.5	20055.6		1844.5	31649.9		1844.5	30120.8		1844.5	14241.8		1844.5	31608.9		1844.5	31151.5		1844.5	19880.6		1844.5	25358.2		1844.5	12102.2		1844.5	29108.6		1844.5
1846.12	27545.1	1.49336		1846.12	25301.4		1846.12	14272		1846.12	26269.8		1846.12	20148		1846.12	25831.6		1846.12	20068.9		1846.12	31649.9		1846.12	30122.7		1846.12	14177.9		1846.12	31608.9		1846.12	31166.6		1846.12	19844.2		1846.12	25307.8		1846.12	12101.2		1846.12	29144		1846.12
1847.73	27553.9	1.49384		1847.73	25321.6		1847.73	14277		1847.73	26335.2		1847.73	20210.1		1847.73	25837.9		1847.73	20123		1847.73	31649.9		1847.73	30078.1		1847.73	14231.8		1847.73	31608.9		1847.73	31156.4		1847.73	19880.4		1847.73	25322.6		1847.73	12062		1847.73	29115.3		1847.73
1849.35	27511.4	1.49154		1849.35	25320.7		1849.35	14311.2		1849.35	26334.5		1849.35	20167.1		1849.35	25912.3		1849.35	20119.7		1849.35	31649.9		1849.35	30198.9		1849.35	14283.8		1849.35	31608.9		1849.35	31184		1849.35	19908		1849.35	25408.6		1849.35	12138.1		1849.35	29197.2		1849.35
1850.96	27578.6	1.49518		1850.96	25248.8		1850.96	14264.3		1850.96	26279.1		1850.96	20223.5		1850.96	25870.3		1850.96	20117		1850.96	31649.9		1850.96	30169.7		1850.96	14236.7		1850.96	31608.9		1850.96	31202.7		1850.96	19865.2		1850.96	25441.1		1850.96	12159.5		1850.96	29203.1		1850.96
1852.58	27570.8	1.49476		1852.58	25340.3		1852.58	14327.1		1852.58	26351.9		1852.58	20183.8		1852.58	25893.2		1852.58	20117.8		1852.58	31649.9		1852.58	30139.9		1852.58	14284.9		1852.58	31608.9		1852.58	31207.8		1852.58	19855.8		1852.58	25371.3		1852.58	12104.4		1852.58	29196.8		1852.58
1854.19	27547	1.49347		1854.19	25342.9		1854.19	14325.9		1854.19	26411		1854.19	20196.8		1854.19	26010.7		1854.19	20127.7		1854.19	31649.9		1854.19	30215.2		1854.19	14319.1		1854.19	31608.9		1854.19	31192.6		1854.19	19917.1		1854.19	25409.7		1854.19	12171.2		1854.19	29243.4		1854.19
1855.81	27623.8	1.49763		1855.81	25374.2		1855.81	14327.4		1855.81	26387.7		1855.81	20319.6		1855.81	25950.5		1855.81	20182.2		1855.81	31649.9		1855.81	30168.9		1855.81	14318.1		1855.81	31608.9		1855.81	31198		1855.81	19954.6		1855.81	25450.3		1855.81	12156.5		1855.81	29233.6		1855.81
1857.42	27662.3	1.49972		1857.42	25351.6		1857.42	14331.6		1857.42	26429		1857.42	20192.7		1857.42	25978.9		1857.42	20184.5		1857.42	31649.9		1857.42	30183.6		1857.42	14274.1		1857.42	31608.9		1857.42	31241.8		1857.42	19998		1857.42	25448		1857.42	12175		1857.42	29287.4		1857.42
1859.04	27626.6	1.49778		1859.04	25460.3		1859.04	14302.7		1859.04	26401.6		1859.04	20246.7		1859.04	25970.4		1859.04	20157.6		1859.04	31649.9		1859.04	30211.7		1859.04	14326.3		1859.04	31608.9		1859.04	31160.9		1859.04	19952.1		1859.04	25507		1859.04	12099.3		1859.04	29216.6		1859.04
1860.65	27712.5	1.50244		1860.65	25458.6		1860.65	14348.8		1860.65	26433.6		1860.65	20219.4		1860.65	26010		1860.65	20155.7		1860.65	31649.9		1860.65	30175.8		1860.65	14328.3		1860.65	31608.9		1860.65	31199.4		1860.65	19955.4		1860.65	25549.6		1860.65	12174.3		1860.65	29329.5		1860.65
1862.26	27679	1.50063		1862.26	25430.1		1862.26	14328.1		1862.26	26487.6		1862.26	20242.4		1862.26	26048.3		1862.26	20161.4		1862.26	31649.9		1862.26	30197.6		1862.26	14309.7		1862.26	31608.9		1862.26	31192.5		1862.26	20006.4		1862.26	25522.7		1862.26	12203.4		1862.26	29287.4		1862.26
1863.88	27702.8	1.50191		1863.88	25458.9		1863.88	14378.5		1863.88	26496.9		1863.88	20227.2		1863.88	26018.2		1863.88	20260.6		1863.88	31649.9		1863.88	30293.4		1863.88	14318.6		1863.88	31608.9		1863.88	31206.8		1863.88	19970.1		1863.88	25497.7		1863.88	12205.9		1863.88	29398.6		1863.88
1865.49	27708.6	1.50223		1865.49	25427.6		1865.49	14375		1865.49	26471.9		1865.49	20295.8		1865.49	26085.9		1865.49	20219.9		1865.49	31649.9		1865.49	30263		1865.49	14328.8		1865.49	31608.9		1865.49	31221.3		1865.49	19974.7		1865.49	25534.2		1865.49	12199.9		1865.49	29315.9		1865.49
1867.1	27740.9	1.50398		1867.1	25502.3		1867.1	14434.3		1867.1	26532.2		1867.1	20323.8		1867.1	26016.1		1867.1	20230.7		1867.1	31649.9		1867.1	30325.3		1867.1	14351.6		1867.1	31608.9		1867.1	31256.1		1867.1	20085		1867.1	25478.7		1867.1	12222.7		1867.1	29354.4		1867.1
1868.71	27768.7	1.50549		1868.71	25496		1868.71	14412.8		1868.71	26532.5		1868.71	20341		1868.71	26067.1		1868.71	20229.8		1868.71	31649.9		1868.71	30250.2		1868.71	14353.9		1868.71	31608.9		1868.71	31214.2		1868.71	20055.4		1868.71	25469.9		1868.71	12211.5		1868.71	29370.2		1868.71
1870.33	27785.3	1.50639		1870.33	25494.2		1870.33	14375.5		1870.33	26486.1		1870.33	20356.2		1870.33	26051.8		1870.33	20251.9		1870.33	31649.9		1870.33	30264		1870.33	14344.9		1870.33	31608.9		1870.33	31257.4		1870.33	20040.1		1870.33	25570.4		1870.33	12245		1870.33	29406.4		1870.33
1871.93	27800.7	1.50722		1871.93	25546.1		1871.93	14435.9		1871.93	26533.9		1871.93	20380		1871.93	26188.5		1871.93	20297.5		1871.93	31649.9		1871.93	30374.1		1871.93	14371.8		1871.93	31608.9		1871.93	31267.2		1871.93	20108.5		1871.93	25555.1		1871.93	12249.1		1871.93	29387.2		1871.93
1873.55	27884.9	1.51179		1873.55	25558.5		1873.55	14485.3		1873.55	26611.8		1873.55	20334.7		1873.55	26132.4		1873.55	20285.2		1873.55	31649.9		1873.55	30344.2		1873.55	14413.7		1873.55	31608.9		1873.55	31273.6		1873.55	20121		1873.55	25701.9		1873.55	12248.7		1873.55	29427.4		1873.55
1875.16	27813.4	1.50791		1875.16	25504.3		1875.16	14466.8		1875.16	26556.6		1875.16	20336.1		1875.16	26135.5		1875.16	20311.1		1875.16	31649.9		1875.16	30382.7		1875.16	14360		1875.16	31608.9		1875.16	31228.9		1875.16	20053		1875.16	25621.9		1875.16	12199.2		1875.16	29405.8		1875.16
1876.77	27841.1	1.50941		1876.77	25533.8		1876.77	14439.5		1876.77	26634.8		1876.77	20403.9		1876.77	26215.7		1876.77	20308.4		1876.77	31649.9		1876.77	30375.1		1876.77	14421.8		1876.77	31608.9		1876.77	31246.8		1876.77	20141		1876.77	25643.9		1876.77	12267.4		1876.77	29482.3		1876.77
1878.38	27835.9	1.50913		1878.38	25517.6		1878.38	14432.5		1878.38	26666.9		1878.38	20436.6		1878.38	26245.9		1878.38	20340.6		1878.38	31649.9		1878.38	30374.9		1878.38	14394.8		1878.38	31608.9		1878.38	31270		1878.38	20119.1		1878.38	25655.1		1878.38	12261.8		1878.38	29554.8		1878.38
1879.99	27877.6	1.51139		1879.99	25582.1		1879.99	14443.1		1879.99	26660.8		1879.99	20415.3		1879.99	26253.1		1879.99	20399.4		1879.99	31649.9		1879.99	30367.4		1879.99	14434.1		1879.99	31608.9		1879.99	31287.8		1879.99	20123.7		1879.99	25677.9		1879.99	12293.5		1879.99	29523.5		1879.99
1881.6	27855.3	1.51018		1881.6	25646.5		1881.6	14479.9		1881.6	26719.8		1881.6	20400.8		1881.6	26176.4		1881.6	20380.1		1881.6	31649.9		1881.6	30392.6		1881.6	14452.9		1881.6	31608.9		1881.6	31306.7		1881.6	20117.1		1881.6	25700.6		1881.6	12258.5		1881.6	29543.2		1881.6
1883.21	27938.9	1.51471		1883.21	25655.7		1883.21	14510.7		1883.21	26650.7		1883.21	20432.2		1883.21	26199.9		1883.21	20397.1		1883.21	31649.9		1883.21	30477.1		1883.21	14475.6		1883.21	31608.9		1883.21	31284.6		1883.21	20171.6		1883.21	25690.1		1883.21	12326		1883.21	29562.4		1883.21
1884.81	27951.9	1.51542		1884.81	25670.6		1884.81	14496.9		1884.81	26737.1		1884.81	20425.4		1884.81	26284.4		1884.81	20384.4		1884.81	31649.9		1884.81	30532.2		1884.81	14471.6		1884.81	31608.9		1884.81	31298.6		1884.81	20190.7		1884.81	25673.8		1884.81	12258.3		1884.81	29540.1		1884.81
1886.42	27958.5	1.51578		1886.42	25679.4		1886.42	14521		1886.42	26765.5		1886.42	20474.6		1886.42	26298.7		1886.42	20384.5		1886.42	31649.9		1886.42	30430		1886.42	14462.9		1886.42	31608.9		1886.42	31270.9		1886.42	20204.2		1886.42	25753.1		1886.42	12273.1		1886.42	29537.3		1886.42
1888.03	28052.8	1.52089		1888.03	25586.8		1888.03	14524.6		1888.03	26731.7		1888.03	20471.4		1888.03	26262.3		1888.03	20379		1888.03	31649.9		1888.03	30479.2		1888.03	14501.4		1888.03	31608.9		1888.03	31284.1		1888.03	20209.9		1888.03	25741.9		1888.03	12306.6		1888.03	29588.4		1888.03
1889.64	27986.3	1.51729		1889.64	25714.1		1889.64	14528.9		1889.64	26752.3		1889.64	20434.2		1889.64	26270.2		1889.64	20424.1		1889.64	31649.9		1889.64	30465.8		1889.64	14500.4		1889.64	31608.9		1889.64	31278.1		1889.64	20230.5		1889.64	25714.7		1889.64	12291.8		1889.64	29550.8		1889.64
1891.25	27970.6	1.51644		1891.25	25702.1		1891.25	14523.9		1891.25	26775.2		1891.25	20531.5		1891.25	26234.5		1891.25	20438.5		1891.25	31649.9		1891.25	30507.4		1891.25	14448.1		1891.25	31608.9		1891.25	31310.8		1891.25	20172.9		1891.25	25761.2		1891.25	12347.3		1891.25	29607.4		1891.25
1892.85	28027.8	1.51953		1892.85	25675.9		1892.85	14535.5		1892.85	26781.2		1892.85	20492.3		1892.85	26293.1		1892.85	20428.2		1892.85	31649.9		1892.85	30543.9		1892.85	14533.5		1892.85	31608.9		1892.85	31297.5		1892.85	20222.6		1892.85	25763.4		1892.85	12343.5		1892.85	29674.8		1892.85
1894.46	28080.2	1.52238		1894.46	25702.1		1894.46	14525.4		1894.46	26858.7		1894.46	20481.2		1894.46	26312.3		1894.46	20457.6		1894.46	31649.9		1894.46	30541.7		1894.46	14507.7		1894.46	31608.9		1894.46	31287.8		1894.46	20261.2		1894.46	25807.2		1894.46	12342.6		1894.46	29588.4		1894.46
1896.07	28038	1.52009		1896.07	25709.2		1896.07	14562.6		1896.07	26778.1		1896.07	20518		1896.07	26332.8		1896.07	20520.8		1896.07	31649.9		1896.07	30551.5		1896.07	14524.5		1896.07	31608.9		1896.07	31319.3		1896.07	20247.5		1896.07	25816.4		1896.07	12337.6		1896.07	29657.5		1896.07
1897.67	27991.7	1.51758		1897.67	25759.4		1897.67	14571.5		1897.67	26841.8		1897.67	20516.2		1897.67	26360		1897.67	20484.3		1897.67	31649.9		1897.67	30533.7		1897.67	14528.7		1897.67	31608.9		1897.67	31297.8		1897.67	20243.7		1897.67	25863.8		1897.67	12302.6		1897.67	29656.6		1897.67
1899.28	27988.2	1.51739		1899.28	25788.9		1899.28	14551.6		1899.28	26833.7		1899.28	20472.4		1899.28	26353.7		1899.28	20491.3		1899.28	31649.9		1899.28	30552.9		1899.28	14496.8		1899.28	31608.9		1899.28	31294.3		1899.28	20268.4		1899.28	25792.6		1899.28	12316.6		1899.28	29641.1		1899.28
1900.88	28070.7	1.52186		1900.88	25827		1900.88	14553.1		1900.88	26863.8		1900.88	20552.2		1900.88	26378.3		1900.88	20487.5		1900.88	31649.9		1900.88	30539.2		1900.88	14548.4		1900.88	31608.9		1900.88	31326.2		1900.88	20266.1		1900.88	25854.8		1900.88	12377.7		1900.88	29710.7		1900.88
1902.49	28129.3	1.52504		1902.49	25794.9		1902.49	14594.2		1902.49	26922.4		1902.49	20497.2		1902.49	26438		1902.49	20485.6		1902.49	31649.9		1902.49	30494.1		1902.49	14550.1		1902.49	31608.9		1902.49	31338.4		1902.49	20346.9		1902.49	25849.4		1902.49	12358.6		1902.49	29727.3		1902.49
1904.1	28035.4	1.51995		1904.1	25767.1		1904.1	14601		1904.1	26886.7		1904.1	20561.5		1904.1	26372.4		1904.1	20437.2		1904.1	31649.9		1904.1	30576		1904.1	14533.3		1904.1	31608.9		1904.1	31293.2		1904.1	20257.2		1904.1	25862.5		1904.1	12324		1904.1	29705.5		1904.1
1905.7	28149.3	1.52612		1905.7	25889.3		1905.7	14605.5		1905.7	26985.9		1905.7	20608.6		1905.7	26452		1905.7	20561.2		1905.7	31649.9		1905.7	30612.5		1905.7	14575.4		1905.7	31608.9		1905.7	31310.3		1905.7	20365.6		1905.7	25898.6		1905.7	12396.5		1905.7	29737.4		1905.7
1907.3	28139.7	1.5256		1907.3	25820.3		1907.3	14540.8		1907.3	26936.7		1907.3	20587.6		1907.3	26369.8		1907.3	20503.2		1907.3	31649.9		1907.3	30632.4		1907.3	14556.8		1907.3	31608.9		1907.3	31322		1907.3	20346.6		1907.3	25876.3		1907.3	12356.8		1907.3	29731.9		1907.3
1908.91	28122.8	1.52469		1908.91	25843		1908.91	14584.6		1908.91	26910.9		1908.91	20632.8		1908.91	26423.7		1908.91	20517.7		1908.91	31649.9		1908.91	30557.7		1908.91	14551		1908.91	31608.9		1908.91	31337.2		1908.91	20361.4		1908.91	25933.2		1908.91	12394.5		1908.91	29782.8		1908.91
1910.51	28200.6	1.5289		1910.51	25880.6		1910.51	14659.2		1910.51	26950.2		1910.51	20650		1910.51	26494.8		1910.51	20563		1910.51	31649.9		1910.51	30624.2		1910.51	14581		1910.51	31608.9		1910.51	31345.9		1910.51	20379.6		1910.51	25954.8		1910.51	12400.5		1910.51	29776.4		1910.51
1912.12	28242.1	1.53115		1912.12	25885.5		1912.12	14616.5		1912.12	27018.7		1912.12	20663.8		1912.12	26528.6		1912.12	20532.1		1912.12	31649.9		1912.12	30640		1912.12	14599.2		1912.12	31608.9		1912.12	31329.2		1912.12	20316.5		1912.12	25877.9		1912.12	12409.1		1912.12	29768.3		1912.12
1913.72	28244.7	1.53129		1913.72	25850.4		1913.72	14675.3		1913.72	26990.2		1913.72	20660.5		1913.72	26445		1913.72	20562.5		1913.72	31649.9		1913.72	30688.7		1913.72	14625.3		1913.72	31608.9		1913.72	31355		1913.72	20362		1913.72	25923.4		1913.72	12427.1		1913.72	29758.6		1913.72
1915.32	28168.3	1.52715		1915.32	25847.2		1915.32	14660.2		1915.32	26976.4		1915.32	20609.1		1915.32	26439.4		1915.32	20616.4		1915.32	31649.9		1915.32	30648.8		1915.32	14593		1915.32	31608.9		1915.32	31329.5		1915.32	20348		1915.32	25948.8		1915.32	12407.4		1915.32	29838.4		1915.32
1916.93	28227.3	1.53035		1916.93	25963.3		1916.93	14610.9		1916.93	27007		1916.93	20602.4		1916.93	26529.9		1916.93	20591.1		1916.93	31649.9		1916.93	30691.4		1916.93	14644.2		1916.93	31608.9		1916.93	31328.1		1916.93	20403.6		1916.93	25952.5		1916.93	12440.5		1916.93	29793.2		1916.93
1918.53	28242.8	1.53119		1918.53	25941.4		1918.53	14631.3		1918.53	27028.4		1918.53	20636.3		1918.53	26505.4		1918.53	20625.3		1918.53	31649.9		1918.53	30722.4		1918.53	14632.9		1918.53	31608.9		1918.53	31344.4		1918.53	20392.9		1918.53	25987.4		1918.53	12417.5		1918.53	29786.5		1918.53
1920.13	28313.9	1.53505		1920.13	25973.6		1920.13	14668.1		1920.13	27074.7		1920.13	20700		1920.13	26511.8		1920.13	20636.2		1920.13	31649.9		1920.13	30716.1		1920.13	14647.9		1920.13	31608.9		1920.13	31352.6		1920.13	20437.4		1920.13	26052.1		1920.13	12430.2		1920.13	29868.8		1920.13
1921.73	28384.5	1.53888		1921.73	25979.3		1921.73	14641.9		1921.73	27077.4		1921.73	20689.9		1921.73	26574.2		1921.73	20638.5		1921.73	31649.9		1921.73	30709.5		1921.73	14633.5		1921.73	31608.9		1921.73	31346.4		1921.73	20431.4		1921.73	26039.2		1921.73	12415.3		1921.73	29874.3		1921.73
1923.33	28334.2	1.53615		1923.33	26001.4		1923.33	14675		1923.33	27126.3		1923.33	20774.9		1923.33	26557.4		1923.33	20675.5		1923.33	31649.9		1923.33	30792.2		1923.33	14655.2		1923.33	31608.9		1923.33	31346.3		1923.33	20433		1923.33	26028.7		1923.33	12442.3		1923.33	29837.3		1923.33
1924.93	28383.8	1.53884		1924.93	26030.3		1924.93	14762.9		1924.93	27174.7		1924.93	20672.3		1924.93	26563.7		1924.93	20676.5		1924.93	31649.9		1924.93	30765.3		1924.93	14684.5		1924.93	31608.9		1924.93	31367.5		1924.93	20456.7		1924.93	26106.6		1924.93	12471.9		1924.93	29914.6		1924.93
1926.53	28350.1	1.53701		1926.53	26020.6		1926.53	14728.1		1926.53	27148.6		1926.53	20710.2		1926.53	26606.9		1926.53	20623.4		1926.53	31649.9		1926.53	30747.7		1926.53	14654.6		1926.53	31608.9		1926.53	31349.1		1926.53	20497.1		1926.53	25987.1		1926.53	12458.7		1926.53	29911		1926.53
1928.13	28315.8	1.53515		1928.13	25996.3		1928.13	14708.3		1928.13	27155.1		1928.13	20748		1928.13	26620.9		1928.13	20682.9		1928.13	31649.9		1928.13	30784.7		1928.13	14692.9		1928.13	31608.9		1928.13	31334.4		1928.13	20474.8		1928.13	26057.4		1928.13	12447.2		1928.13	29991.1		1928.13
1929.73	28421.3	1.54087		1929.73	26077.9		1929.73	14686.7		1929.73	27117.4		1929.73	20744.4		1929.73	26671.7		1929.73	20701.6		1929.73	31649.9		1929.73	30771.8		1929.73	14681.2		1929.73	31608.9		1929.73	31362.6		1929.73	20520.3		1929.73	26078.7		1929.73	12467.6		1929.73	29932.4		1929.73
1931.34	28404.9	1.53998		1931.34	26095.1		1931.34	14748.7		1931.34	27181.1		1931.34	20745		1931.34	26671.3		1931.34	20686.3		1931.34	31649.9		1931.34	30756.1		1931.34	14688.2		1931.34	31608.9		1931.34	31361.4		1931.34	20506.9		1931.34	26083.8		1931.34	12515.4		1931.34	29963.3		1931.34
1932.93	28345.2	1.53674		1932.93	26049		1932.93	14722.9		1932.93	27159.5		1932.93	20762.3		1932.93	26628.9		1932.93	20715.7		1932.93	31649.9		1932.93	30837		1932.93	14683.2		1932.93	31608.9		1932.93	31357.7		1932.93	20525.9		1932.93	26124.2		1932.93	12426.1		1932.93	29966.2		1932.93
1934.53	28408.2	1.54016		1934.53	25979.1		1934.53	14719.4		1934.53	27202.8		1934.53	20783.5		1934.53	26640.4		1934.53	20764		1934.53	31649.9		1934.53	30820.2		1934.53	14730		1934.53	31608.9		1934.53	31371.6		1934.53	20524.8		1934.53	26086.5		1934.53	12501.6		1934.53	29989.9		1934.53
1936.13	28428.4	1.54126		1936.13	26047.1		1936.13	14713.7		1936.13	27187.7		1936.13	20747.5		1936.13	26708.7		1936.13	20707.9		1936.13	31649.9		1936.13	30803.2		1936.13	14754.1		1936.13	31608.9		1936.13	31363.7		1936.13	20554.7		1936.13	26146.2		1936.13	12505.9		1936.13	29997.5		1936.13
1937.73	28406	1.54004		1937.73	26084.8		1937.73	14727.2		1937.73	27197.1		1937.73	20748.7		1937.73	26670		1937.73	20785.4		1937.73	31649.9		1937.73	30836.1		1937.73	14708.7		1937.73	31608.9		1937.73	31353.2		1937.73	20559.8		1937.73	26054		1937.73	12523.5		1937.73	29938.6		1937.73
1939.33	28467.7	1.54338		1939.33	26119.1		1939.33	14733.3		1939.33	27260.9		1939.33	20801.4		1939.33	26625.7		1939.33	20706.8		1939.33	31649.9		1939.33	30804.8		1939.33	14727.5		1939.33	31608.9		1939.33	31371.6		1939.33	20545.1		1939.33	26155		1939.33	12516.5		1939.33	30020.4		1939.33
1940.93	28521.4	1.5463		1940.93	26082.6		1940.93	14768.4		1940.93	27300.1		1940.93	20804.5		1940.93	26748.5		1940.93	20777.1		1940.93	31649.9		1940.93	30774		1940.93	14757.6		1940.93	31608.9		1940.93	31347.8		1940.93	20570.3		1940.93	26168.9		1940.93	12526.8		1940.93	30050.7		1940.93
1942.52	28451.9	1.54253		1942.52	26085.3		1942.52	14737.3		1942.52	27187.8		1942.52	20801.8		1942.52	26675.8		1942.52	20729.6		1942.52	31649.9		1942.52	30833		1942.52	14729		1942.52	31608.9		1942.52	31348.5		1942.52	20526.9		1942.52	26171.8		1942.52	12504		1942.52	30044.7		1942.52
1944.12	28483	1.54421		1944.12	26141.4		1944.12	14788.4		1944.12	27299.3		1944.12	20767.9		1944.12	26731.2		1944.12	20768		1944.12	31649.9		1944.12	30892.8		1944.12	14773.4		1944.12	31608.9		1944.12	31364.7		1944.12	20575.1		1944.12	26178.3		1944.12	12561.1		1944.12	30024.7		1944.12
1945.72	28462.8	1.54312		1945.72	26221.2		1945.72	14786.4		1945.72	27295.7		1945.72	20854.4		1945.72	26699.3		1945.72	20773.3		1945.72	31649.9		1945.72	30872.8		1945.72	14767.7		1945.72	31608.9		1945.72	31365.6		1945.72	20595.4		1945.72	26197.3		1945.72	12547.3		1945.72	30101.4		1945.72
1947.31	28407.5	1.54012		1947.31	26078.4		1947.31	14780.4		1947.31	27269.2		1947.31	20842.1		1947.31	26696.8		1947.31	20774.7		1947.31	31649.9		1947.31	30903.3		1947.31	14730.8		1947.31	31608.9		1947.31	31366.6		1947.31	20608.1		1947.31	26156.2		1947.31	12508.8		1947.31	30059.1		1947.31
1948.91	28461.1	1.54303		1948.91	26109.3		1948.91	14765.2		1948.91	27381.8		1948.91	20877.1		1948.91	26803.7		1948.91	20847.3		1948.91	31649.9		1948.91	30896.9		1948.91	14792		1948.91	31608.9		1948.91	31371.6		1948.91	20640.8		1948.91	26252.1		1948.91	12537.4		1948.91	30154.6		1948.91
1950.51	28514.6	1.54593		1950.51	26136.6		1950.51	14807.9		1950.51	27302.7		1950.51	20865.5		1950.51	26728.5		1950.51	20783		1950.51	31649.9		1950.51	30898.4		1950.51	14778.4		1950.51	31608.9		1950.51	31371.6		1950.51	20604.4		1950.51	26281.3		1950.51	12538		1950.51	30119		1950.51
1952.1	28597.4	1.55042		1952.1	26222.4		1952.1	14821.7		1952.1	27381.1		1952.1	20895.8		1952.1	26768.2		1952.1	20832		1952.1	31649.9		1952.1	30922.4		1952.1	14809.8		1952.1	31608.9		1952.1	31371.6		1952.1	20665.8		1952.1	26263.9		1952.1	12551.6		1952.1	30123.9		1952.1
1953.7	28581.5	1.54956		1953.7	26204.7		1953.7	14806.8		1953.7	27400.6		1953.7	20922.5		1953.7	26800.4		1953.7	20856.1		1953.7	31649.9		1953.7	30933.9		1953.7	14837.5		1953.7	31608.9		1953.7	31362.3		1953.7	20631.1		1953.7	26245		1953.7	12571.8		1953.7	30161.5		1953.7
1955.29	28505.7	1.54545		1955.29	26203.9		1955.29	14841.2		1955.29	27375.4		1955.29	20889		1955.29	26794		1955.29	20846.6		1955.29	31649.9		1955.29	30960.1		1955.29	14820.1		1955.29	31608.9		1955.29	31367.9		1955.29	20642		1955.29	26234.1		1955.29	12554.4		1955.29	30165.7		1955.29
1956.89	28508.6	1.5456		1956.89	26205.9		1956.89	14767.9		1956.89	27444.6		1956.89	20873.8		1956.89	26809.2		1956.89	20843		1956.89	31649.9		1956.89	30937		1956.89	14790		1956.89	31608.9		1956.89	31371.6		1956.89	20710.1		1956.89	26235.3		1956.89	12570.7		1956.89	30149.9		1956.89
1958.48	28574.4	1.54917		1958.48	26251.7		1958.48	14827		1958.48	27380.3		1958.48	20913		1958.48	26883		1958.48	20892.4		1958.48	31649.9		1958.48	30950.5		1958.48	14787.9		1958.48	31608.9		1958.48	31369.6		1958.48	20701.4		1958.48	26293.8		1958.48	12577.8		1958.48	30167.5		1958.48
1960.08	28575.2	1.54922		1960.08	26222.5		1960.08	14831.7		1960.08	27343.5		1960.08	20891.4		1960.08	26804.1		1960.08	20835.3		1960.08	31649.9		1960.08	30900.4		1960.08	14840.7		1960.08	31608.9		1960.08	31368.4		1960.08	20630.3		1960.08	26272.7		1960.08	12577.2		1960.08	30170.7		1960.08
[truncated: 59 more columns]

## Sheet: Raman Warcq
ARD-01_1			ARD-01_2			ARD-02_1			ARD-02_2			ARD-03_1			ARD-03_2			ARD-03_3			ARD-04_1			ARD-04_2			ARD-05_1			ARD-05_2
raman shift (cm-1)	Intensity (AU)		raman shift (cm-1)	Intensity (AU)		raman shift (cm-1)	Intensity (AU)		raman shift (cm-1)	Intensity (AU)		raman shift (cm-1)	Intensity (AU)		raman shift (cm-1)	Intensity (AU)		raman shift (cm-1)	Intensity (AU)		raman shift (cm-1)	Intensity (AU)		raman shift (cm-1)	Intensity (AU)		raman shift (cm-1)	Intensity (AU)		raman shift (cm-1)	Intensity (AU)
107.004	10555		107.004	9074.91		107.004	6711.5		107.004	21177		107.004	7462.5		107.004	10086		107.004	14850.7		107.004	4275		107.004	2447		107.004	22494		107.004	9303.83
108.871	10626.6		108.871	9116.14		108.871	6738.5		108.871	20929		108.871	7497.5		108.871	10077		108.871	14983.3		108.871	4335		108.871	2480		108.871	22664.2		108.871	9341.8
110.74	10725.4		110.74	9318.01		110.74	6938		110.74	20615		110.74	7588		110.74	10306		110.74	15002		110.74	4318.5		110.74	2456		110.74	22753.5		110.74	9428.2
112.606	10736.4		112.606	9355.32		112.606	6994		112.606	20876.5		112.606	7741.5		112.606	10327		112.606	15122		112.606	4393.5		112.606	2550		112.606	23103.4		112.606	9511.54
114.47	10784.2		114.47	9502.73		114.47	7154.5		114.47	21816.5		114.47	7799		114.47	10347		114.47	15240		114.47	4431.5		114.47	2605		114.47	23144.8		114.47	9605.41
116.336	10923.6		116.336	9479.82		116.336	7244.5		116.336	22011.5		116.336	7814		116.336	10518		116.336	15381.3		116.336	4474.5		116.336	2546		116.336	23279.3		116.336	9607.14
118.201	10909.8		118.201	9440.84		118.201	7280.5		118.201	21707		118.201	7901.5		118.201	10616		118.201	15452		118.201	4491		118.201	2610		118.201	23380.6		118.201	9686.23
120.066	10911.2		120.066	9591.74		120.066	7471.5		120.066	22260		120.066	7961.5		120.066	10600		120.066	15542.7		120.066	4562.5		120.066	2646		120.066	23499.3		120.066	9723.13
121.93	10935.3		121.93	9508.29		121.93	7489		121.93	22009.5		121.93	8002		121.93	10692		121.93	15702		121.93	4592		121.93	2641		121.93	23622.7		121.93	9804.14
123.795	10864		123.795	9693.8		123.795	7655		123.795	22622.5		123.795	8096		123.795	10609		123.795	15848.7		123.795	4655.5		123.795	2678		123.795	23554.7		123.795	9796.62
125.656	10963.3		125.656	9449.3		125.656	7606		125.656	22511.5		125.656	8092		125.656	10645		125.656	15873.3		125.656	4616.5		125.656	2647		125.656	23826.1		125.656	9858.74
127.52	10879.5		127.52	9489.29		127.52	7702		127.52	22217		127.52	8145.5		127.52	10673		127.52	15859.3		127.52	4647.5		127.52	2639		127.52	23668.1		127.52	9848.01
129.381	10874.5		129.381	9533.03		129.381	7675.5		129.381	22053		129.381	8197.5		129.381	10791		129.381	16024.7		129.381	4635		129.381	2694		129.381	23733.5		129.381	9831.93
131.243	10867.7		131.243	9441.68		131.243	7768		131.243	21863		131.243	8189.5		131.243	10844		131.243	16014.7		131.243	4646		131.243	2720		131.243	23795		131.243	9876.02
133.105	10964.4		133.105	9418.38		133.105	7800		133.105	22022		133.105	8240		133.105	10828		133.105	16069.3		133.105	4658.5		133.105	2719		133.105	23862.6		133.105	9899.26
134.965	10945		134.965	9638.93		134.965	7811.5		134.965	22412		134.965	8258		134.965	10771		134.965	16146		134.965	4658.5		134.965	2730		134.965	23979.2		134.965	9982.54
136.825	11010.2		136.825	9651.6		136.825	7929		136.825	22656.5		136.825	8283		136.825	10757		136.825	16132		136.825	4732		136.825	2735		136.825	23945.6		136.825	9976.13
138.686	11148.8		138.686	9822.22		138.686	7968.5		138.686	22880		138.686	8282		138.686	10753		138.686	16176.7		138.686	4770		138.686	2807		138.686	24049.5		138.686	10039.3
140.545	11198.9		140.545	10051.5		140.545	8035.5		140.545	22876		140.545	8370.5		140.545	10954		140.545	16281.3		140.545	4844.5		140.545	2920		140.545	24125.1		140.545	10196
142.403	11405.1		142.403	10176.5		142.403	8159.5		142.403	23661.5		142.403	8429		142.403	10878		142.403	16490.7		142.403	5192.5		142.403	2956		142.403	24313		142.403	10389.4
144.263	11550.6		144.263	10495.2		144.263	8355.5		144.263	24072		144.263	8456.5		144.263	11037		144.263	16649.3		144.263	5489		144.263	3096		144.263	24425.2		144.263	10499.2
146.121	11748.5		146.121	10612.9		146.121	8426		146.121	24121.5		146.121	8500		146.121	11105		146.121	16648		146.121	5454		146.121	3108		146.121	24497.8		146.121	10473.9
147.978	11922.7		147.978	10897.6		147.978	8533.5		147.978	24969.5		147.978	8570		147.978	11241		147.978	16752.7		147.978	5389		147.978	3292		147.978	24507.8		147.978	10478
149.835	11978.9		149.835	10980.9		149.835	8878		149.835	25158.5		149.835	8689.5		149.835	11310		149.835	17000		149.835	5423.5		149.835	3486		149.835	24704.7		149.835	10598.1
151.691	11907.2		151.691	11013.8		151.691	9289		151.691	25633		151.691	8839		151.691	11488		151.691	17264.7		151.691	5591		151.691	3833		151.691	25025.8		151.691	10715.6
153.547	11845.8		153.547	10753.8		153.547	9449		153.547	25009.5		153.547	9018		153.547	11598		153.547	17623.3		153.547	5921		153.547	3841		153.547	25118.2		153.547	10810.6
155.403	11674.1		155.403	10484.1		155.403	9548.5		155.403	24971		155.403	9162		155.403	11657		155.403	17770.7		155.403	5979		155.403	3890		155.403	25051.3		155.403	10756.8
157.258	11565		157.258	10231.8		157.258	9220		157.258	24200		157.258	9169		157.258	11800		157.258	17806		157.258	5891.5		157.258	3594		157.258	24965.5		157.258	10719
159.113	11389.4		159.113	9858.21		159.113	8965		159.113	23713.5		159.113	9006.5		159.113	11494		159.113	17675.3		159.113	5652		159.113	3392		159.113	24868.7		159.113	10627.4
160.968	11229.1		160.968	9761.85		160.968	8660		160.968	23411.5		160.968	8929.5		160.968	11447		160.968	17431.3		160.968	5424		160.968	3164		160.968	24790.1		160.968	10549.2
162.822	11181.5		162.822	9636.63		162.822	8540.5		162.822	22912.5		162.822	8797		162.822	11224		162.822	17296		162.822	5379		162.822	3050		162.822	24671.9		162.822	10510.4
164.674	11074.7		164.674	9475.1		164.674	8327.5		164.674	22546.5		164.674	8774.5		164.674	11109		164.674	17110.7		164.674	5246		164.674	2987		164.674	24759.7		164.674	10466.7
166.527	11090.8		166.527	9402.06		166.527	8234		166.527	22479		166.527	8753.5		166.527	11167		166.527	17081.3		166.527	5128		166.527	2961		166.527	24769		166.527	10397.3
168.381	11136.1		168.381	9379.76		168.381	8223.5		168.381	22388.5		168.381	8698		168.381	11072		168.381	17012.7		168.381	5007		168.381	2867		168.381	24725.8		168.381	10352.6
170.231	11129		170.231	9333.84		170.231	8237.5		170.231	22224		170.231	8747		170.231	11046		170.231	17044		170.231	4937.5		170.231	2832		170.231	24813.1		170.231	10390
172.084	11110.1		172.084	9456.54		172.084	8301.5		172.084	22482		172.084	8719		172.084	11090		172.084	17060.7		172.084	4909.5		172.084	2887		172.084	24795.4		172.084	10321.5
173.934	11122.1		173.934	9379.4		173.934	8253		173.934	22751		173.934	8772.5		173.934	11064		173.934	17088.7		173.934	4923		173.934	2896		173.934	24778.2		173.934	10422.7
175.785	11112.4		175.785	9433.57		175.785	8300.5		175.785	22793		175.785	8720.5		175.785	11156		175.785	17023.3		175.785	4952		175.785	2913		175.785	24952.7		175.785	10416
177.634	11112.6		177.634	9462.61		177.634	8376		177.634	22511.5		177.634	8777.5		177.634	11007		177.634	17138.7		177.634	4979.5		177.634	2899		177.634	24946.9		177.634	10498.4
179.485	11091.8		179.485	9466.22		179.485	8477.5		179.485	22569.5		179.485	8770		179.485	11134		179.485	17126		179.485	5144		179.485	2981		179.485	24975.3		179.485	10554.2
181.334	11016.7		181.334	9355.25		181.334	8493.5		181.334	22586.5		181.334	8767		181.334	11010		181.334	17224.7		181.334	5197.5		181.334	3014		181.334	24990.2		181.334	10579.8
183.182	11101.3		183.182	9363.98		183.182	8445		183.182	22486.5		183.182	8824.5		183.182	11020		183.182	17152		183.182	5205		183.182	2955		183.182	24950.3		183.182	10563.4
185.032	11088.1		185.032	9386.17		185.032	8508.5		185.032	22488.5		185.032	8828		185.032	11123		185.032	17256.7		185.032	5232.5		185.032	2946		185.032	25088.2		185.032	10620
186.879	11086		186.879	9416.65		186.879	8458		186.879	22529		186.879	8853		186.879	11259		186.879	17190		186.879	5314		186.879	3001		186.879	25064.3		186.879	10594.7
188.726	11114.9		188.726	9457.3		188.726	8428.5		188.726	22729.5		188.726	8865		188.726	10977		188.726	17260.7		188.726	5427		188.726	2998		188.726	25062		188.726	10658.5
190.573	11149.7		190.573	9514.7		190.573	8587		190.573	22553		190.573	8865		190.573	11182		190.573	17307.3		190.573	5561		190.573	3086		190.573	25133.2		190.573	10690.6
192.419	11150.4		192.419	9553.76		192.419	8486		192.419	22719.5		192.419	8844		192.419	11002		192.419	17268.7		192.419	5631		192.419	3031		192.419	25145.5		192.419	10673.1
194.265	11280.8		194.265	9543.23		194.265	8547.5		194.265	22911		194.265	8903.5		194.265	11145		194.265	17314.7		194.265	5663		194.265	3059		194.265	25273.4		194.265	10672.4
196.11	11314.2		196.11	9547.65		196.11	8530.5		196.11	23101.5		196.11	8884		196.11	11169		196.11	17384		196.11	5449.5		196.11	2978		196.11	25216.1		196.11	10640.5
197.956	11429.2		197.956	9803.29		197.956	8591.5		197.956	23286.5		197.956	8939		197.956	11097		197.956	17458		197.956	5328.5		197.956	3027		197.956	25270.2		197.956	10677.7
199.8	11417.7		199.8	9840.04		199.8	8613		199.8	23669		199.8	8905		199.8	11147		199.8	17417.3		199.8	5209.5		199.8	3018		199.8	25247.4		199.8	10661.6
201.645	11394.2		201.645	9938.76		201.645	8766.5		201.645	24033.5		201.645	8958.5		201.645	11122		201.645	17483.3		201.645	5183.5		201.645	3141		201.645	25388.7		201.645	10800.8
203.487	11362.9		203.487	9745.11		203.487	8975.5		203.487	23755.5		203.487	8932.5		203.487	11063		203.487	17524.7		203.487	5267		203.487	3267		203.487	25536.7		203.487	10972.8
205.33	11359.1		205.33	9629.5		205.33	9143.5		205.33	23724		205.33	9029		205.33	11224		205.33	17544.7		205.33	5456		205.33	3371		205.33	25696.5		205.33	11119.1
207.174	11291.1		207.174	9522.4		207.174	9266.5		207.174	23337.5		207.174	8996		207.174	11251		207.174	17585.3		207.174	5714.5		207.174	3361		207.174	25757.1		207.174	11147.2
209.017	11164.5		209.017	9400.02		209.017	9126		209.017	23011.5		209.017	9013.5		209.017	11171		209.017	17578.7		209.017	5847.5		209.017	3404		209.017	25727.1		209.017	11053.8
210.857	11128.2		210.857	9354.13		210.857	9050.5		210.857	22964		210.857	9002.5		210.857	11203		210.857	17595.3		210.857	5822.5		210.857	3380		210.857	25634.1		210.857	11039.1
212.699	11131		212.699	9322.49		212.699	8874.5		212.699	22750		212.699	9092		212.699	11150		212.699	17626		212.699	5887		212.699	3322		212.699	25592.4		212.699	10970.4
214.539	11081.2		214.539	9228.05		214.539	8825.5		214.539	22725.5		214.539	9009		214.539	11197		214.539	17685.3		214.539	5903		214.539	3384		214.539	25601		214.539	10923
216.381	11060		216.381	9238.16		216.381	8742		216.381	22662		216.381	9023		216.381	11200		216.381	17718.7		216.381	5938		216.381	3320		216.381	25577.3		216.381	10880.8
218.22	11001.8		218.22	9160.19		218.22	8792		218.22	22610		218.22	9067		218.22	11187		218.22	17834		218.22	5809.5		218.22	3214		218.22	25561.5		218.22	10787.3
220.058	10986.8		220.058	9108.06		220.058	8691		220.058	22459.5		220.058	9145		220.058	11329		220.058	17815.3		220.058	5655		220.058	3117		220.058	25559		220.058	10797.8
221.899	11040.6		221.899	9089.99		221.899	8662.5		221.899	22319		221.899	9073		221.899	11240		221.899	17819.3		221.899	5462		221.899	3090		221.899	25576.2		221.899	10728.1
223.737	11042.3		223.737	9053.03		223.737	8599.5		223.737	22513.5		223.737	9172.5		223.737	11348		223.737	17834		223.737	5253.5		223.737	3002		223.737	25471.2		223.737	10736.1
225.574	10996.6		225.574	8988.48		225.574	8701.5		225.574	22385.5		225.574	9154		225.574	11335		225.574	17946.7		225.574	5193		225.574	2986		225.574	25489		225.574	10721.3
227.411	10971.6		227.411	9029.16		227.411	8611		227.411	22517		227.411	9128		227.411	11458		227.411	17878.7		227.411	5157.5		227.411	2928		227.411	25520.4		227.411	10711.8
229.25	11009.4		229.25	9078.52		229.25	8669.5		229.25	22477.5		229.25	9168.5		229.25	11359		229.25	17884		229.25	5153		229.25	2935		229.25	25545.3		229.25	10749.5
231.087	11036.9		231.087	9053.35		231.087	8635		231.087	22600.5		231.087	9222.5		231.087	11494		231.087	17976		231.087	5126		231.087	2931		231.087	25503.6		231.087	10728.1
232.923	11030.9		232.923	9121.02		232.923	8731.5		232.923	22637.5		232.923	9188		232.923	11450		232.923	18047.3		232.923	5072.5		232.923	2972		232.923	25579.1		232.923	10762.2
234.759	11018		234.759	9046.83		234.759	8708		234.759	22607		234.759	9224.5		234.759	11518		234.759	18070		234.759	5098		234.759	2936		234.759	25576.1		234.759	10736
236.594	11042.7		236.594	9103.03		236.594	8730.5		236.594	22725		236.594	9192		236.594	11478		236.594	17984.7		236.594	5047		236.594	3000		236.594	25537		236.594	10759.1
238.429	11060.4		238.429	9151.07		238.429	8673.5		238.429	22811		238.429	9195		238.429	11560		238.429	18142		238.429	5097.5		238.429	2953		238.429	25563.6		238.429	10720.5
240.262	11143.2		240.262	9139.62		240.262	8749.5		240.262	23009.5		240.262	9268.5		240.262	11626		240.262	18113.3		240.262	5111.5		240.262	2977		240.262	25641.2		240.262	10816.9
242.096	11197.9		242.096	9160.86		242.096	8789		242.096	22971		242.096	9313.5		242.096	11632		242.096	18075.3		242.096	5093		242.096	2993		242.096	25692.1		242.096	10804.6
243.93	11182		243.93	9126.83		243.93	8833.5		243.93	23113.5		243.93	9374.5		243.93	11646		243.93	18154		243.93	5143		243.93	3071		243.93	25678.5		243.93	10900.6
245.764	11131.6		245.764	9170.42		245.764	8955		245.764	22916.5		245.764	9287		245.764	11703		245.764	18166.7		245.764	5120.5		245.764	3027		245.764	25697.5		245.764	10840.2
247.595	11137.6		247.595	9169.12		247.595	8832.5		247.595	23271		247.595	9392.5		247.595	11655		247.595	18217.3		247.595	5168.5		247.595	3024		247.595	25661.4		247.595	10793.9
249.428	11151		249.428	9178.56		249.428	8910		249.428	23093.5		249.428	9410		249.428	11822		249.428	18254.7		249.428	5158		249.428	3036		249.428	25693		249.428	10838
251.26	11117.9		251.26	9172.47		251.26	8888.5		251.26	23149.5		251.26	9335.5		251.26	11828		251.26	18264		251.26	5190		251.26	3055		251.26	25732.3		251.26	10850.5
253.09	11127.8		253.09	9129.01		253.09	8889.5		253.09	23179.5		253.09	9388		253.09	11803		253.09	18350		253.09	5206.5		253.09	3020		253.09	25849		253.09	10864.5
254.92	11080.7		254.92	9194.08		254.92	8853.5		254.92	22938		254.92	9390		254.92	11803		254.92	18372		254.92	5165.5		254.92	3018		254.92	25754.3		254.92	10894.9
256.751	11175.6		256.751	9176.69		256.751	8979.5		256.751	23156.5		256.751	9403		256.751	11788		256.751	18297.3		256.751	5176		256.751	2974		256.751	25774		256.751	10929.7
258.58	11177.6		258.58	9266.46		258.58	8967		258.58	23213		258.58	9409.5		258.58	11893		258.58	18401.3		258.58	5212		258.58	3031		258.58	25850.4		258.58	10939.9
260.411	11197.2		260.411	9270.11		260.411	9000		260.411	23246.5		260.411	9468		260.411	12036		260.411	18564		260.411	5241		260.411	3064		260.411	25831.7		260.411	10950.3
262.239	11231.8		262.239	9243.68		262.239	8929		262.239	23259.5		262.239	9464		262.239	12070		262.239	18571.3		262.239	5282		262.239	3034		262.239	25905.9		262.239	10935.2
264.067	11242.5		264.067	9236.6		264.067	8970		264.067	23276.5		264.067	9531		264.067	12149		264.067	18786		264.067	5338		264.067	3048		264.067	25926.4		264.067	11007.8
265.894	11256.7		265.894	9230.53		265.894	9013.5		265.894	23319		265.894	9456.5		265.894	12164		265.894	18720		265.894	5281.5		265.894	3039		265.894	26007		265.894	10989.8
267.722	11294.7		267.722	9260.29		267.722	9017.5		267.722	23303.5		267.722	9624.5		267.722	12198		267.722	18874.7		267.722	5369.5		267.722	3124		267.722	26070.1		267.722	11023.9
269.55	11266.5		269.55	9317.29		269.55	9018.5		269.55	23352		269.55	9713		269.55	12400		269.55	19072.7		269.55	5445		269.55	3097		269.55	26109.4		269.55	11075
271.377	11305.3		271.377	9307.69		271.377	9036.5		271.377	23418		271.377	9798.5		271.377	12601		271.377	19139.3		271.377	5483.5		271.377	3101		271.377	26131.5		271.377	11117.4
273.203	11278.8		273.203	9205.91		273.203	9049.5		273.203	23321.5		273.203	9838.5		273.203	12662		273.203	19448		273.203	5544		273.203	3106		273.203	26066.2		273.203	11113.8
275.029	11330		275.029	9236.37		275.029	9038.5		275.029	23261		275.029	9905.5		275.029	12890		275.029	19686.7		275.029	5542.5		275.029	3133		275.029	26174.1		275.029	11136
276.852	11325.2		276.852	9217.65		276.852	8973		276.852	23156.5		276.852	10102		276.852	12979		276.852	20010		276.852	5466		276.852	3149		276.852	26152.3		276.852	11132.6
278.677	11265.6		278.677	9207.53		278.677	9060.5		278.677	23234		278.677	10290		278.677	13300		278.677	20544		278.677	5485.5		278.677	3111		278.677	26156.4		278.677	11077.9
280.502	11352		280.502	9192.33		280.502	8979.5		280.502	23084		280.502	10371.5		280.502	13294		280.502	20915.3		280.502	5417		280.502	3132		280.502	26245.3		280.502	11159.6
282.326	11317.4		282.326	9228.28		282.326	9025.5		282.326	23142.5		282.326	10473.5		282.326	13339		282.326	20973.3		282.326	5429.5		282.326	3096		282.326	26198.4		282.326	11139.8
284.148	11259.8		284.148	9195.52		284.148	9041		284.148	23008.5		284.148	10430		284.148	13070		284.148	20790		284.148	5458		284.148	3112		284.148	26248.8		284.148	11158
285.971	11309.5		285.971	9193.7		285.971	8958.5		285.971	23119.5		285.971	10280.5		285.971	13036		285.971	20563.3		285.971	5472.5		285.971	3115		285.971	26324.1		285.971	11155.9
287.794	11331.2		287.794	9221.85		287.794	9010		287.794	23117.5		287.794	10132.5		287.794	12780		287.794	20254		287.794	5415		287.794	3057		287.794	26291.6		287.794	11199.9
289.615	11368.1		289.615	9168.89		289.615	8954		289.615	23084.5		289.615	9943.5		289.615	12448		289.615	19928		289.615	5403.5		289.615	3057		289.615	26449.1		289.615	11217.2
291.438	11300		291.438	9233.68		291.438	8975.5		291.438	22992.5		291.438	9853		291.438	12461		291.438	19378.7		291.438	5313.5		291.438	3090		291.438	26319.4		291.438	11178.2
293.258	11326.8		293.258	9201.11		293.258	9015		293.258	22901		293.258	9803		293.258	12222		293.258	19379.3		293.258	5295		293.258	3003		293.258	26378.9		293.258	11180
295.079	11320.3		295.079	9255.06		295.079	8962.5		295.079	22894		295.079	9718		295.079	12168		295.079	19183.3		295.079	5234.5		295.079	3044		295.079	26525.3		295.079	11253.9
296.899	11326.7		296.899	9222.24		296.899	8962.5		296.899	23080		296.899	9656.5		296.899	11992		296.899	19066.7		296.899	5255.5		296.899	3041		296.899	26481.5		296.899	11221.5
298.718	11442.4		298.718	9257.35		298.718	8983.5		298.718	22977.5		298.718	9610.5		298.718	12024		298.718	19096		298.718	5278.5		298.718	2997		298.718	26523.8		298.718	11205.1
300.538	11420.8		300.538	9272.53		300.538	8858		300.538	22900		300.538	9675		300.538	11925		300.538	18980.7		300.538	5230		300.538	3005		300.538	26509.9		300.538	11224.6
302.357	11434.2		302.357	9265.44		302.357	8940.5		302.357	23158.5		302.357	9669.5		302.357	11854		302.357	18956.7		302.357	5267		302.357	3018		302.357	26512		302.357	11275.6
304.174	11469.5		304.174	9288.34		304.174	9049		304.174	23086.5		304.174	9600		304.174	11914		304.174	19007.3		304.174	5276		304.174	2964		304.174	26624.2		304.174	11291.4
305.992	11443.6		305.992	9296.36		305.992	8964.5		305.992	23147.5		305.992	9675.5		305.992	11936		305.992	19096		305.992	5263.5		305.992	3036		305.992	26679.8		305.992	11314.2
307.809	11498.7		307.809	9294.92		307.809	8916		307.809	23326.5		307.809	9604		307.809	11828		307.809	19026		307.809	5207		307.809	3009		307.809	26642.6		307.809	11329.1
309.626	11484.1		309.626	9372.32		309.626	9047.5		309.626	23214		309.626	9697.5		309.626	11918		309.626	18919.3		309.626	5282		309.626	2949		309.626	26847.9		309.626	11385.8
311.442	11481.6		311.442	9338.16		311.442	8972		311.442	23133		311.442	9660.5		311.442	12028		311.442	19028.7		311.442	5260.5		311.442	3028		311.442	26843.3		311.442	11387.2
313.258	11507.1		313.258	9327.22		313.258	9017.5		313.258	23189		313.258	9678.5		313.258	11942		313.258	19062.7		313.258	5276.5		313.258	3011		313.258	26904		313.258	11437
315.074	11557.1		315.074	9301.86		315.074	8983		315.074	23087.5		315.074	9743		315.074	11928		315.074	19184.7		315.074	5297		315.074	3009		315.074	27015		315.074	11527.6
316.889	11590		316.889	9357.47		316.889	9067		316.889	23141.5		316.889	9806.5		316.889	11938		316.889	19190		316.889	5352.5		316.889	3056		316.889	27083.9		316.889	11485.6
318.705	11660.8		318.705	9341.4		318.705	9022.5		318.705	23182.5		318.705	9755.5		318.705	11983		318.705	19244.7		318.705	5353		318.705	2996		318.705	27208.9		318.705	11578.8
320.517	11634.3		320.517	9361.55		320.517	9078		320.517	23338.5		320.517	9797		320.517	11899		320.517	19309.3		320.517	5348		320.517	3006		320.517	27142.1		320.517	11601.6
322.331	11683.5		322.331	9385.32		322.331	9091		322.331	23326.5		322.331	9801.5		322.331	11986		322.331	19274.7		322.331	5311.5		322.331	3030		322.331	27298.2		322.331	11621.5
324.145	11723		324.145	9381.5		324.145	9139.5		324.145	23419.5		324.145	9900		324.145	12101		324.145	19331.3		324.145	5366.5		324.145	3019		324.145	27360.2		324.145	11586.7
[truncated: 905 more rows]
