# Supplementary material for: Clumped isotope evidence for Early Jurassic extreme polar warmth and high climate sensitivity
Source: Copernicus journal article supplement (doi:10.5194/cp-18-435-2022), 2022-03-04
Supplement: Supplementary file 3 [file cp-18-435-2022-supplement.zip › Supplementary Table S2.xlsx]

## Sheet: All data
									Geochemical results										Calculated parameters
Sample	Site	Period	Paleolatitude °N	Paleolatitude ° 95% CI	Height (m)	Type	Mineralogy	Preservation investigation	Laboratory	Replicates	δ13C (‰ VPDB)	δ13C SD (‰ VPDB)	δ18O (‰ VPDB)	δ18O SD (‰ VPDB)	δ18O (‰ VSMOW)	δ18O SD (‰ VSMOW)	Δ47 (‰ ICDES)	Δ47 95% CI	T (°C)	T 95%CI (°C)	T equation	δ18Osw (‰ VSMOW)	δ18Osw 95% CI (‰ VSMOW)	Isotope fractionation equation	Comment
POL-28	Polovinnaya River	Toarcian	85.35	3.4	0.3	Dacryomya jacutica	Aragonite	RAMAN	LGLTPE	2	3.47	0.0123045	-5.084	0.00154086	25.6689	0.00159434
POL-29aV	Polovinnaya River	Unknown			0.75	Calcite vein	Calcite	RAMAN	LSCE	2	-1.21	0.01	-14.21	0.02	16.2608	0.02	0.5752	0.0134	31.5302	4.84653	Anderson et al. (2021)	-10.5706	0.917213	Kim and O'Neil (1997)
POL-29aM	Polovinnaya River	Toarcian	85.35	3.4	0.75	Carbonate matrix	Calcite	RAMAN	LGLTPE	3	-21.431	0.292064	-2.803	0.39282	28.0204	0.4
POL-29aD	Polovinnaya River	Toarcian	85.35	3.4	0.75	Dacryomya jacutica	Aragonite	RAMAN	LGLTPE	2	-4.669	0.67737	-2.071	0.220478	28.775	0.227293									Recrystallized shell
POL-49	Polovinnaya River	Toarcian	85.35	3.4	1.02	Dacryomya jacutica	Aragonite	RAMAN	LSCE	1	4.03	0.01	-2.36697	0.02	28.4699	0.02	0.6457	0.0182	8.84297	5.21891	Anderson et al. (2021)	-4.80597	1.20251	Grossman and Ku (1986)
POL-35	Polovinnaya River	Toarcian	85.35	3.4	1.05	Dacryomya jacutica	Aragonite	RAMAN	LGLTPE	2	3.58922	0.1	-2.21938	0.1	28.622	0.1
POL-35a	Polovinnaya River	Toarcian	85.35	3.4	1.05	Dacryomya jacutica	Aragonite	RAMAN	LSCE	3	3.75	0.01	-2.13707	0.02	28.7069	0.02	0.6151	0.0108	18.0496	3.41028	Anderson et al. (2021)	-2.45471	0.785778	Grossman and Ku (1986)
POL-54	Polovinnaya River	Toarcian	85.35	3.4	1.9	Dacryomya jacutica	Aragonite	RAMAN	LGLTPE	2	4.293	0.0193114	-2.87	0.103942	27.9513	0.107155
POL-18	Polovinnaya River	Toarcian	85.35	3.4	2.4	Dacryomya jacutica	Aragonite	RAMAN	LSCE	3	4.23	0.01	-2.71683	0.02	28.1092	0.02	0.6247	0.0108	15.0648	3.30648	Anderson et al. (2021)	-3.72222	0.761862	Grossman and Ku (1986)
POL-11a	Polovinnaya River	Toarcian	85.35	3.4	3	Dacryomya jacutica	Aragonite	RAMAN	LGLTPE	2	4.842	0.0288891	-2.822	0.00662805	28.0008	0.00683292
POL-11b	Polovinnaya River	Toarcian	85.35	3.4	3	Dacryomya jacutica	Aragonite	RAMAN	LGLTPE	2	4.256	0.0403773	-2.746	0.17283	28.0791	0.178172
POL-8	Polovinnaya River	Toarcian	85.35	3.4	3.95	Dacryomya jacutica	Aragonite	SEM, RAMAN	LGLTPE	2	4.602	0.151182	-3.006	0.0816426	27.8111	0.0841662
POL-9	Polovinnaya River	Toarcian	85.35	3.4	4.15	Dacryomya jacutica	Aragonite	RAMAN	LGLTPE	2	4.672	0.0512421	-2.078	0.293668	28.7678	0.302745
POL-4	Polovinnaya River	Toarcian	85.35	3.4	4.95	Dacryomya jacutica	Aragonite	RAMAN	LGLTPE	2	4.66758	0.1	-2.84964	0.1	27.9723	0.1
POL-4a	Polovinnaya River	Toarcian	85.35	3.4	4.95	Dacryomya jacutica	Aragonite	RAMAN	LGLTPE	2	5.088	0.0230268	-2.728	0.000839479	28.0977	0.000865427
POL-4b	Polovinnaya River	Toarcian	85.35	3.4	4.95	Dacryomya jacutica	Aragonite	RAMAN	LGLTPE	2	4.604	0.0125178	-2.891	0.00807308	27.9296	0.00832262
POL-2	Polovinnaya River	Toarcian	85.35	3.4	6.5	Dacryomya jacutica	Aragonite	RAMAN	LSCE	2	4.59	0.01	-2.21703	0.02	28.6244	0.02	0.6279	0.0129	14.0901	3.90947	Anderson et al. (2021)	-3.44702	0.9008	Grossman and Ku (1986)
POL-43	Polovinnaya River	Toarcian	85.35	3.4	6.65	Dacryomya jacutica	Aragonite	RAMAN	LGLTPE	2	3.726	0.100328	-2.886	0.0994403	27.9348	0.102514
POL-5a	Polovinnaya River	Toarcian	85.35	3.4	6.7	Dacryomya jacutica	Aragonite	RAMAN	LGLTPE	2	4.917	0.0925647	-2.325	0.144239	28.5131	0.148697
POL-5b	Polovinnaya River	Toarcian	85.35	3.4	6.7	Dacryomya jacutica	Aragonite	RAMAN	LSCE	5	4.21	0.01	-2.75681	0.02	28.068	0.02	0.6209	0.0086	16.2353	2.66515	Anderson et al. (2021)	-3.49251	0.614089	Grossman and Ku (1986)
POL-31a	Polovinnaya River	Toarcian	85.35	3.4	7.1	Dacryomya jacutica	Aragonite	RAMAN	LGLTPE	2	4.754	0.1	-2.827	0.1	27.9956	0.1
POL-31b	Polovinnaya River	Toarcian	85.35	3.4	7.1	Dacryomya jacutica	Aragonite	RAMAN	LGLTPE	2	4.548	0.10974	-2.923	0.0198284	27.8967	0.0204413
POL-31c	Polovinnaya River	Toarcian	85.35	3.4	7.1	Dacryomya jacutica	Aragonite	RAMAN	LGLTPE	2	4.93	0.025342	-3.014	0.0268279	27.8028	0.0276571
POL-44	Polovinnaya River	Toarcian	85.35	3.4	7.48	Dacryomya jacutica	Aragonite	RAMAN	LGLTPE	2	4.857	0.0186057	-3.128	0.102106	27.6853	0.105262
POL-13	Polovinnaya River	Toarcian	85.35	3.4	7.85	Dacryomya jacutica	Aragonite	RAMAN	LGLTPE	2	4.62946	0.1	-3.57145	0.1	27.2282	0.1
POL-13a	Polovinnaya River	Toarcian	85.35	3.4	7.85	Dacryomya jacutica	Aragonite	RAMAN	LSCE	2	4.76	0.01	-3.24661	0.02	27.563	0.02	0.6283	0.0131	13.9689	3.96506	Anderson et al. (2021)	-4.50451	0.913609	Grossman and Ku (1986)
POL-25	Polovinnaya River	Toarcian	85.35	3.4	8.35	Dacryomya jacutica	Aragonite	SEM, RAMAN	LGLTPE	2	4.418	0.309363	-0.36	0.317553	30.5389	0.327369
POL-56	Polovinnaya River	Toarcian	85.35	3.4	8.6	Dacryomya jacutica	Aragonite	RAMAN	LGLTPE	2	4.96	0.0245316	-3.02	0.0101992	27.7967	0.0105144
POL-33	Polovinnaya River	Toarcian	85.35	3.4	8.6	Dacryomya jacutica	Aragonite	RAMAN	LSCE	2	4.19	0.01	-2.76681	0.02	28.0577	0.02	0.627	0.0131	14.3632	3.98142	Anderson et al. (2021)	-3.93386	0.917378	Grossman and Ku (1986)
POL-21	Polovinnaya River	Toarcian	85.35	3.4	8.62	Dacryomya jacutica	Aragonite	RAMAN	LSCE	5	4.94	0.01	-2.64686	0.02	28.1813	0.02	0.618	0.0088	17.1382	2.75273	Anderson et al. (2021)	-3.17451	0.63427	Grossman and Ku (1986)
POL-32	Polovinnaya River	Toarcian	85.35	3.4	9.02	Dacryomya jacutica	Aragonite	RAMAN	LGLTPE	2	4.525	0.0481565	-3.39	0.086953	27.4152	0.0903742
POL-12	Polovinnaya River	Toarcian	85.35	3.4	13.15	Dacryomya jacutica	Aragonite	SEM, RAMAN	LGLTPE	2	4.678	0.155471	-2.578	0.0429909	28.2523	0.0443197
POL-27	Polovinnaya River	Toarcian	85.35	3.4	13.6	Dacryomya jacutica	Aragonite	RAMAN	LGLTPE	2	4.36234	0.1	-2.60732	0.1	28.2221	0.1
Ard-05	Warcq	Pliensbaschian	41.67	3		Beaniceras sp.	Aragonite	SEM, RAMAN	LSCE	5	0.37	0.01	-0.827602	0.02	30.0568	0.02	0.592	0.0085	25.6299	2.89912	Anderson et al. (2021)	0.601353	0.668	Grossman and Ku (1986)
Ard-04	Warcq	Pliensbaschian	41.67	3		Undetermined bivalve	Aragonite	RAMAN	LSCE	4	2.75	0.01	-2.77681	0.02	28.0474	0.02	0.5851	0.0095	28.0114	3.31829	Anderson et al. (2021)	-0.799101	0.764584	Grossman and Ku (1986)
Ard-01	Warcq	Pliensbaschian	41.67	3		Grammatondon sp.	Aragonite	RAMAN	LSCE	3	2.82	0.01	-2.14706	0.02	28.6966	0.02	0.5883	0.0108	26.8999	3.73076	Anderson et al. (2021)	-0.425477	0.859622	Grossman and Ku (1986)
Ard-03	Warcq	Pliensbaschian	41.67	3		Limea sp.	Calcite	SEM, RAMAN	LSCE	2	2.46	0.01	-2.56	0.02	28.2709	0.02	0.5955	0.013	24.4432	4.38133	Anderson et al. (2021)	-1.40447	1.00952	Grossman and Ku (1986)
Ard-06	Warcq	Pliensbaschian	41.67	3		Aegoceras ?	Aragonite		LSCE	4	1.99	0.02	-2.67685	0.03	28.1504	0.03	0.5891	0.0074	26.6239	2.54922	Anderson et al. (2021)	-1.01885	0.587377	Grossman and Ku (1986)
Ard-08	Warcq	Pliensbaschian	41.67	3			Aragonite		LSCE	3	2.64	0.02	-2.7868	0.03	28.0371	0.03	0.5911	0.0084	25.9373	2.87387	Anderson et al. (2021)	-1.28701	0.662181	Grossman and Ku (1986)
