# Supplementary material for: Clumped isotope evidence for Early Jurassic extreme polar warmth and high climate sensitivity
Source: Copernicus journal article supplement (doi:10.5194/cp-18-435-2022), 2022-03-04
Supplement: Supplementary file 3 [file cp-18-435-2022-supplement.zip › Supplementary Table S3.xlsx]

## Sheet: Gradients
Location	Age	Samples	Paleolatitude	δ18Oc (‰VPDB)	Δ47 (‰ ICDES)	Δ47 95% CI	Δ47 T (°C)	Δ47 T 95% CI	δ18Osw (‰VSMOW)	δ18Osw 95% CI	T° TEX86h (°C)
Siberia	TOAE	Pol 13	85.35	-3.23	0.6283	0.0131	13.9689	3.96506	-4.4879	0.913609
Siberia	TOAE	Pol 18	85.35	-2.7	0.6247	0.0108	15.0648	3.30648	-3.70539	0.761862
Siberia	TOAE	Pol 21	85.35	-2.63	0.618	0.0088	17.1382	2.75273	-3.15765	0.63427
Siberia	TOAE	Pol 2	85.35	-2.21	0.6279	0.0129	14.0901	3.90947	-3.43998	0.9008
Siberia	TOAE	Pol 33	85.35	-2.76	0.627	0.0131	14.3632	3.98142	-3.92705	0.917378
Siberia	TOAE	Pol 35a	85.35	-2.12	0.6151	0.0108	18.0496	3.41028	-2.43764	0.785778
Siberia	TOAE	Pol 49	85.35	-2.36	0.6457	0.0182	8.84297	5.21891	-4.79899	1.20251
Siberia	TOAE	Pol 5b	85.35	-2.74	0.6209	0.0086	16.2353	2.66515	-3.4757	0.614089
Ardennes	Pliensbachian	Ard-05 am	41.67	-0.84	0.592	0.0085	25.6299	2.89912	0.588955	0.668
Ardennes	Pliensbachian	Ard-04 biv	41.67	-2.77	0.5851	0.0095	28.0114	3.31829	-0.792295	0.764584
Ardennes	Pliensbachian	Ard-01 biv	41.67	-2.14	0.5883	0.0108	26.8999	3.73076	-0.418414	0.859622
Ardennes	Pliensbachian	Ard-03 biv	41.67	-2.54	0.5955	0.013	24.4432	4.38133	-1.38447	1.00952
Ardennes	Pliensbachian	Ard-06 am	41.67	-2.67685	0.5891	0.0074	26.6239	2.54922	-1.01885	0.587377
Ardennes	Pliensbachian	Ard-07 biv	41.67	-2.7868	0.5911	0.0084	25.9373	2.87387	-1.28701	0.662181
Valdorbia	TOAE	K015224	15								27.2
Valdorbia	TOAE	K015227	15								23.3
La Cerradura	TOAE	K014382	20								30.4
Valdorbia	TOAE	K015232	15								30.4
Valdorbia	TOAE	K015233	15								29.3
Valdorbia	TOAE	K015233	15								23.8
La Cerradura	TOAE	K014361	20								19.5

## Sheet: Salinity estimates
Location	Age	Sample	δ18Osw (‰VSMOW)	δ18Osw 95% CI	Estimated S					Hypotheses
					high 18Op (hyp)		low 18Op (hyp)
					Freshwater %	Salinity ‰	Freshwater %	Salinity ‰		Parameter	Value
Siberia	TOAE	Pol 13	-4.4879	0.913609	38.7544	21.1297	24.9136	25.9048		Global ocean δ18O (‰VSMOW)	-1
Siberia	TOAE	Pol 18	-3.70539	0.761862	30.0599	24.1293	19.3242	27.8331		Gobal ocean S ‰	34.5
Siberia	TOAE	Pol 21	-3.15765	0.63427	23.9739	26.229	15.4118	29.1829		18Op (high) (‰VSMOW)	-10
Siberia	TOAE	Pol 2	-3.43998	0.9008	27.1109	25.1467	17.4285	28.4872		18Op (low) (‰VSMOW)	-15
Siberia	TOAE	Pol 33	-3.92705	0.917378	32.5228	23.2797	20.9075	27.2869		Precipitation S ‰	0
Siberia	TOAE	Pol 35a	-2.43764	0.785778	15.9738	28.989	10.2689	30.9572
Siberia	TOAE	Pol 49	-4.79899	1.20251	42.211	19.9372	27.1357	25.1382
Siberia	TOAE	Pol 5b	-3.4757	0.614089	27.5077	25.0098	17.6835	28.3992
Mean					29.7643	24.2313	19.1342	27.8987
Max					42.211	28.989	27.1357	30.9572
Min					15.9738	19.9372	10.2689	25.1382
Med					28.7838	24.5696	18.5039	28.1162
SD					8.27457	2.85473	5.31936	1.83518
2 SE					5.851	2.0186	3.76136	1.29767
Location	Age	Sample	δ18Osw (‰VSMOW)	δ18Osw 95% CI	Estimated precipitation 18Op					Hypotheses
					Low hyp	Mid hyp	High hyp
										Parameter	Value
Siberia	TOAE	Pol 13	-4.4879	0.91244	-9.29879	-27.7406	-81.2217			Global ocean δ18O (‰VSMOW)	-1
Siberia	TOAE	Pol 18	-3.70539	0.760887	-7.43697	-21.7413	-63.224			Gobal ocean S ‰	34.5
Siberia	TOAE	Pol 21	-3.15765	0.633459	-6.13372	-17.542	-50.6259			Local salinity (low)	20
Siberia	TOAE	Pol 2	-3.43998	0.899647	-6.80548	-19.7065	-57.1196			Local salinity (mid)	30
Siberia	TOAE	Pol 33	-3.92705	0.916204	-7.96435	-23.4407	-68.3221			Local salinity (high)	33
Siberia	TOAE	Pol 35a	-2.43764	0.784772	-4.4206	-12.0219	-34.0658			Precipitation S ‰	0
Siberia	TOAE	Pol 49	-4.79899	1.20097	-10.039	-30.1256	-88.3769
Siberia	TOAE	Pol 5b	-3.4757	0.613303	-6.89045	-19.9803	-57.941			freshwater fraction (low)	0.42029
										freshwater fraction (mid)	0.130435
Mean					-7.37367	-21.5374	-62.6121			freshwater fraction (high)	0.0434783
Max					-4.4206	-12.0219	-34.0658
Min					-10.039	-30.1256	-88.3769
Med					-7.16371	-20.8608	-60.5825
SD					1.7719	5.70945	17.1284
2 SE					1.25292	4.03719	12.1116
