# Supplementary material for: Clumped isotope evidence for Early Jurassic extreme polar warmth and high climate sensitivity
Source: Copernicus journal article supplement (doi:10.5194/cp-18-435-2022), 2022-03-04
Supplement: Supplementary file 3 [file cp-18-435-2022-supplement.zip › Supplementary Table S4.xlsx]

## Sheet: File Description
Description of the different sheets and data
Sheet delta47 : Compilation of published clumped isotopes data of marine carbonates.
Sample: Name of the sample from source.
Δ47(x;y) column B,C,D,F,I,L : published Δ47 value in different reference frame (x) or using different isotopic parameters (y).
SE,SD columns: associated uncertainties
n : number of replicate analyses
Reported Temp. (°C): Published temperatures using a specific reference frame and calibration equation.
(+; -) : Temperature uncertainties. If only + is completed consider upper and lower uncertainties the same.
Temperature equation: Temperature equation used to calculate the Reported temperature acording to the source.
Comment: a general comment on the data. ar=aragonite sample, ca=calcite sample
δ13Ccc\par(‰ VPDB): δ13C value
δ18Occ\par(‰ VPDB): Carbonate δ18O value relative to VPDB
δ18Occ\par(‰ SMOW): Carbonate δ18O relative to VSMOW, recalculated here.
δ18Osw\par(‰): Published δ18O of the calcifying fluid, relative to VSMOW
Mineral/water fractionation Calc from T clumped using Hyperbolic equation : Fractionation factor between mineral and water, calculated for a specific hyperbolic equation based on the reported temperature.
recalculated δ18Osw\(‰) hyperbolic equation : δ18O of the calcifying fluid relative to VSMOW, recalculated with available data using an hyperbolic fractionnation equation.
Hyperbolic carbonate fractionation equation : Source for the hyperbolic fractionation equation used
recalculated δ18Osw\(‰) from biogenic fractionation equation : δ18O of the calcifying fluid relative to VSMOW, recalculated with available data using a fractionnation equation established from modern biogenic carbonates.
Empirical biogenic carbonate fractionation equation : Source for the biogenic carbonate fractionnation equation used.
Location : Location of the collecting site.
Formation : formation where the sample were collected
Stage: Chronostratigraphic age on the sample
Time Slice: Time slice in which the sample was attributed to build Fig 5
Age (Ma): Absolute age of the sample in million years
Uncertainty: Age uncertainty in Ma
Paleolatitude: Paleolatitude of the collecting site in °, at the time of deposit, computed using paleolatitude.org (van Hinsbergen et al., 2015), model of Torsvik et al. (2012)
(+,-): Uncertainties associated witth paleolatitude estimate in °
Taxa: Taxonomic identification (if available)
Source: Source of the data (references available in the suplementary data file)
Sheet TEX 86 : Compilation of published TEX 86 data
Reference: Source of the data used in this compilation
Locality: Collection site
Latitude: Latitude of the sampling site in (°)
Longitude: Longitude of the sampling site in (°)
TEX 86: TEX 86 Value
T°C TEX86H : Published temperature using hyperbolic calibration
T°C TEX86L : Published temperature using the linear calibration
Age : Chronostratigraphic age
Time Slice: Time slice in which the sample was attributed to build Fig 5
Absolute age Ma : Absolute age of the sample in million years
Paleolatitude: Paleolatitude of the collecting site in °, at the time of deposit, computed using paleolatitude.org (van Hinsbergen et al., 2015), model of Torsvik et al. (2012)
Primary source : Original source of the data
Sheet Marine reptiles: Compilation of published phosphate d18O values from marine reptiles (for now only marine turtles data are available).
Location: Fossil collecting site
Stage: Chronostratigraphic age
Sample: Sample name in source
Taxa: Taxonomic identification
Remarqs: General comments
Paleolatitude: Paleolatitude of the collecting site in °, at the time of deposit, computed using paleolatitude.org (van Hinsbergen et al., 2015), model of Torsvik et al. (2012)
δ18Op (‰VSMOW) : phosphate δ18O value relative to VSMOW
δ18Op 2SE : Uncertainties associated with phosphate δ18O value
δ18Osw (‰VSMOW) : δ18O value of the environmental water relative to VSMOW
δ18Op 2SE : Uncertainties associated with δ18O value of water
Equation : Source of the fractionnation equation used
Source: Source of the data

## Sheet: delta47
Sample	Δ47(Ghosh;Gonfiantini)	Δ47(Abs.;Gonfiantini)	Δ47 (Abs; Brand)	1SE	Δ47 (‰, CDES25)	1SD	n	Δ47lab*		External	Δ47abs	Reported Temp. (°C)	+	-	temperature equation	comment	δ13Ccc\par(‰ VPDB)	δ18Occ\par(‰ VPDB)	δ18Occ\par(‰ SMOW)	δ18Osw\par(‰)	SE	Mineral/water fractionation Calc from T clumped using Hyperbolic equation	recalculated δ18Osw\(‰) hyperbolic equation	Hyperbolic carbonate fractionation equation	recalculated δ18Osw\(‰) from biogenic fractionation equation	Empirical biogenic carbonate fractionation equation	Location	Formation	Stage	Time Slice	Age (Ma)	Uncertainty	Paleo-latitude	+	-	Taxa	Source
								(‰)	SE	error	(‰)
BF8d	0.637	0.696	0.679	0.012			3					29.4	3.1	3	Zaarur et al. (2013).		1.18	-0.77	30.1162	1.9		1.02755	2.50129	Kim and O'Neil (1997)	1.92515	Erez and Luz (1983)	Mississippi, USA	Byram	Rupelian		31	1	25			RadiateNummulites	Evans et al. (2018).
17/36/2 80-95	0.624	0.682	0.678	0.012			3					29.7	3.2	3.1	Zaarur et al. (2013).		2.23	-2.89	27.9307	-0.16		1.02749	0.433422	Kim and O'Neil (1997)	-0.130796	Erez and Luz (1983)	Tanzania DrillingProject	Pande	Priabonian	Eocene	33.9	0	-20			ReticulateNummulites	Evans et al. (2018).
KW01	0.612	0.67	0.658	0.007			8					35	2	2	Zaarur et al. (2013).		1.2	-4.79	25.972	-0.93		1.02643	-0.449919	Kim and O'Neil (1997)	-0.907734	Erez and Luz (1983)	Nanggulan, Java	Nanggulan	Bartonian	Eocene	39	1	-6			Nummulites djokdjokartae	Evans et al. (2018).
KW03	0.608	0.666	0.653	0.007			9					36.3	1.9	1.9	Zaarur et al. (2013).		1.28	-4.79	25.972	-0.66		1.02618	-0.204197	Kim and O'Neil (1997)	-0.63469	Erez and Luz (1983)	Nanggulan, Java	Nanggulan	Bartonian	Eocene	39	1	-6			Nummulites djokdjokartae	Evans et al. (2018).
SW1	0.651	0.711	0.704	0.01			4					23.2	2.6	2.5	Zaarur et al. (2013).		2.92	-5.47	25.271	-4.14		1.02883	-3.45729	Kim and O'Neil (1997)	-4.11058	Erez and Luz (1983)	Hampshire Basin, UK	Selsey	Lutetian	Eocene	42.5	1.5	45			Palaeonummulitesaff.prestwichianus	Evans et al. (2018).
BS1	0.636	0.695	0.689	0.01			4					27	2.7	2.6	Zaarur et al. (2013).		2.11	-2.48	28.3534	-0.33		1.02804	0.308934	Kim and O'Neil (1997)	-0.299177	Erez and Luz (1983)	Balegem Sandpit,Belgium	Lede	Lutetian	Eocene	44	1	45			Nummulites aquitanicus	Evans et al. (2018).
W10-3c	0.629	0.687	0.675	0.008			7					30.4	2.1	2	Zaarur et al. (2013).		1.93	-4.68	26.0854	-1.8		1.02734	-1.22542	Kim and O'Neil (1997)	-1.77154	Erez and Luz (1983)	Isle of Wight, UK	Earnley	Lutetian	Eocene	47	1	44			Nummulites britannicus	Evans et al. (2018).
K98,3	0.611	0.669	0.657	0.009			5					35.1	2.6	2.5	Zaarur et al. (2013).		0.99	-4.52	26.2503	-0.64		1.02641	-0.159766	Kim and O'Neil (1997)	-0.616698	Erez and Luz (1983)	Kutch, India	Naredi	Ypresian	Eocene	49.9	1.5	5			Nummulites burdigalensis cantabricus	Evans et al. (2018).
EF2	0.627	0.686	0.673	0.01			4					31.1	2.8	2.7	Zaarur et al. (2013).		2.3	-4.51	26.2606	-1.49		1.0272	-0.918304	Kim and O'Neil (1997)	-1.45257	Erez and Luz (1983)	Ampe Quarry,Belgium	Hyon	Ypresian	Eocene	50.7	0.1	45			Palaeonummulites planulatus	Evans et al. (2018).
EF1	0.64	0.7	0.682	0.009			5					28.5	2.4	2.3	Zaarur et al. (2013).		1.98	-4.97	25.7864	-2.49		1.02773	-1.88991	Kim and O'Neil (1997)	-2.46732	Erez and Luz (1983)	Ampe Quarry,Belgium	Hyon	Ypresian	Eocene	50.8	0.1	45			Palaeonummulites planulatus	Evans et al. (2018).
KE57,5	0.665	0.726	0.717	0.01			4					20	2.5	2.4	Zaarur et al. (2013).		-0.79	-3.31	27.4977	-2.67		1.02951	-1.95598	Kim and O'Neil (1997)	-2.64918	Erez and Luz (1983)	GSB KesterBorehole,Belgium	Mons-en-Pévèle	Ypresian	Eocene	53.4	0.1	45			Palaeonummulites planulatus	Evans et al. (2018).
CJTT	0.671	0.732	0.724	0.012			3					18.5	2.8	2.7	Zaarur et al. (2013).		1.17	-4.45	26.3225	-4.13		1.02984	-3.41282	Kim and O'Neil (1997)	-4.11887	Erez and Luz (1983)	Paris Basin,France	Cuise	Ypresian	Eocene	53.5	1	43			Palaeonummulites planulatus	Evans et al. (2018).
K136,4	0.616	0.674	0.665	0.009			5					33.1	2.5	2.5	Zaarur et al. (2013).		0.39	-4.56	26.2091	-1.1		1.02681	-0.581777	Kim and O'Neil (1997)	-1.0785	Erez and Luz (1983)	Kutch, India	Naredi	Ypresian	Eocene	54.9	1.5	5			Nummulites burdigalensis kuepperi	Evans et al. (2018).
K/N-06/5	0.62	0.678	0.675	0.009			5					30.4	2.5	2.4	Zaarur et al. (2013).		0.7	-4.56	26.2091	-1.66		1.02734	-1.105	Kim and O'Neil (1997)	-1.65154	Erez and Luz (1983)	Kutch, India	Naredi	Ypresian	Eocene	55.3	1.5	5			Nummulites globulus nanus	Evans et al. (2018).
ET7					0.676	0.009	3					27	3	3	Bonifacie et al, (2017).		3.07	-1.22	29.6523	-0.2		1.02979			1.32052	Epstein et al., (1953)	EST210, NE France	Coral limestones	Bajocian	Middle Jurassic	170	1.5	31.5	4.9		Trichites	Brigaud et al (2020),
0153C1							1	0.699	0.018	0.019	0.761	12	3.7		Zaarur et al. (2013).	T uncertainty is 1SE	0.28	1.007	31.9481	-0.77	0.79	1.03207	-0.115443	Kim et al.,(2007)	-0.704567	Grossman and Ku (1986)	Seymour Island	La Meseta Fm.	Priabonian	Eocene	37.4		-70.62			Cucullaea	Douglas et al., (2014).
0153C4							3	0.705	0.009	0.011	0.768	10.6	1.9		Zaarur et al. (2013).	T uncertainty is 1SE	0.277	1.247	32.1955	-0.86	0.47	1.03239	-0.18508	Kim et al.,(2007)	-0.787147	Grossman and Ku (1986)	Seymour Island	La Meseta Fm.	Priabonian	Eocene	37.4		-70.62			Cucullaea	Douglas et al., (2014).
0199C1*							5	0.69	0.007	0.009	0.751	14.1	1.7		Zaarur et al. (2013).	T uncertainty is 1SE	-2.494	0.902	31.8399	-0.4	0.41	1.03159	0.23809	Kim et al.,(2007)	-0.325696	Grossman and Ku (1986)	Seymour Island	La Meseta Fm.	Priabonian	Eocene	37.5		-70.62			Cucullaea	Douglas et al., (2014).
170C1-shell*							3	0.696	0.015	0.011	0.759	12.5	3.2		Zaarur et al. (2013).	T uncertainty is 1SE	-0.299	-0.078	30.8296	-1.71	0.76	1.03195	-1.08958	Kim et al.,(2007)	-1.67436	Grossman and Ku (1986)	Seymour Island	La Meseta Fm.	Lutetian	Eocene	41.5		-70.62			Cucullaea	Douglas et al., (2014).
0143C1							3	0.696	0.017	0.011	0.758	12.7	3.7		Zaarur et al. (2013).	T uncertainty is 1SE	1.19	0.444	31.3677	-1.15	0.86	1.03191	-0.524347	Kim et al.,(2007)	-1.10628	Grossman and Ku (1986)	Seymour Island	La Meseta Fm.	Lutetian	Eocene	42		-70.62			Cucullaea	Douglas et al., (2014).
0143C3							3	0.696	0.01	0.011	0.759	12.6	2.2		Zaarur et al. (2013).	T uncertainty is 1SE	1.675	0.347	31.2677	-1.29	0.56	1.03193	-0.643128	Kim et al.,(2007)	-1.22632	Grossman and Ku (1986)	Seymour Island	La Meseta Fm.	Lutetian	Eocene	42		-70.62			Cucullaea	Douglas et al., (2014).
06311C1*							3	0.695	0.01	0.011	0.758	12.8	2.3		Zaarur et al. (2013).	T uncertainty is 1SE	-1.671	0.18	31.0956	-1.41	0.59	1.03189	-0.766231	Kim et al.,(2007)	-1.34724	Grossman and Ku (1986)	Seymour Island	La Meseta Fm.	Lutetian	Eocene	44		-70.62			Cucullaea	Douglas et al., (2014).
0104C1							3	0.66	0.008	0.011	0.72	21	1.9		Zaarur et al. (2013).	T uncertainty is 1SE	0.714	0.012	30.9224	0.32	0.43	1.03009	0.808921	Kim et al.,(2007)	0.374166	Grossman and Ku (1986)	Seymour Island	La Meseta Fm.	Lutetian	Eocene	45		-69.52			Cucullaea	Douglas et al., (2014).
0104C3							3	0.684	0.013	0.011	0.746	14.3	2.2		Zaarur et al. (2013).	T uncertainty is 1SE	1.671	-0.802	30.0832	-2.04	0.53	1.03155	-1.42152	Kim et al.,(2007)	-1.98361	Grossman and Ku (1986)	Seymour Island	La Meseta Fm.	Lutetian	Eocene	45		-69.52			Cucullaea	Douglas et al., (2014).
0104C2							5	0.689	0.01	0.009	0.751	15.3	2.9		Zaarur et al. (2013).	T uncertainty is 1SE	1.643	0.05	30.9615	-0.94	0.64	1.03133	-0.354511	Kim et al.,(2007)	-0.901198	Grossman and Ku (1986)	Seymour Island	La Meseta Fm.	Lutetian	Eocene	45		-69.52			Cucullaea	Douglas et al., (2014).
LMF-shell							3	0.682	0.009	0.011	0.743	15.9	2.1		Zaarur et al. (2013).	T uncertainty is 1SE	-1.2	-0.184	30.7203	-1.16	0.58	1.03119	-0.459812	Kim et al.,(2007)	-0.996949	Grossman and Ku (1986)	Seymour Island	La Meseta Fm.		Eocene	N/A					Cucullaea	Douglas et al., (2014).
0182E30							4	0.677	0.008	0.01	0.739	16.9	1.8		Zaarur et al. (2013).	T uncertainty is 1SE	-1.075	1.019	31.9605	0.26	0.4	1.03097	0.956292	Kim et al.,(2007)	0.436465	Grossman and Ku (1986)	Seymour Island	La Meseta Fm.	Priabonian	Eocene	34		-69.36			Eurhomalea	Douglas et al., (2014).
0159E31							3	0.694	0.009	0.011	0.765	13	2		Zaarur et al. (2013).	T uncertainty is 1SE	-0.897	1.047	31.9894	-0.6	0.58	1.03184	0.143649	Kim et al.,(2007)	-0.434152	Grossman and Ku (1986)	Seymour Island	La Meseta Fm.	Priabonian	Eocene	34		-69.36			Eurhomalea	Douglas et al., (2014).
0159E30							2	0.712	0.015	0.013	0.775	9.2	3.1		Zaarur et al. (2013).	T uncertainty is 1SE	0.222	1.06	32.0028	-1.46	0.61	1.03271	-0.68409	Kim et al.,(2007)	-1.29673	Grossman and Ku (1986)	Seymour Island	La Meseta Fm.	Priabonian	Eocene	34		-69.36			Eurhomalea	Douglas et al., (2014).
0153E5							3	0.698	0.004	0.011	0.76	12.2	0.8		Zaarur et al. (2013).	T uncertainty is 1SE	-0.232	0.653	31.5832	-1.07	0.17	1.03202	-0.425113	Kim et al.,(2007)	-1.01248	Grossman and Ku (1986)	Seymour Island	La Meseta Fm.	Priabonian	Eocene	37.4		-70.62			Eurhomalea	Douglas et al., (2014).
0199E2							2	0.696	0.005	0.013	0.758	12.7	1.2		Zaarur et al. (2013).	T uncertainty is 1SE	-2.892	1.118	32.0625	-0.51	0.03	1.03191	0.148994	Kim et al.,(2007)	-0.432276	Grossman and Ku (1986)	Seymour Island	La Meseta Fm.	Priabonian	Eocene	37.5		-70.62			Eurhomalea	Douglas et al., (2014).
0199E5							3	0.689	0.004	0.011	0.751	14.3	0.9		Zaarur et al. (2013).	T uncertainty is 1SE	-3.418	0.949	31.8883	-0.31	0.22	1.03155	0.32838	Kim et al.,(2007)	-0.232613	Grossman and Ku (1986)	Seymour Island	La Meseta Fm.	Priabonian	Eocene	37.5		-70.62			Eurhomalea	Douglas et al., (2014).
0163E1							3	0.702	0.02	0.011	0.765	11.3	4.3		Zaarur et al. (2013).	T uncertainty is 1SE	-1.952	-0.734	30.1533	-2.64	0.97	1.03223	-2.00848	Kim et al.,(2007)	-2.60686	Grossman and Ku (1986)	Seymour Island	La Meseta Fm.	Bartonian	Eocene	40.5		-70.62			Eurhomalea	Douglas et al., (2014).
0163E3							1	0.687	0.011	0.019	0.749	14.6	3.2		Zaarur et al. (2013).	T uncertainty is 1SE	-2.153	-2.248	28.5925	-3.42	0.73	1.03148	-2.80194	Kim et al.,(2007)	-3.36049	Grossman and Ku (1986)	Seymour Island	La Meseta Fm.	Bartonian	Eocene	40.5		-70.62			Eurhomalea	Douglas et al., (2014).
0108E2							3	0.692	0.01	0.011	0.754	13.6	2.2		Zaarur et al. (2013).	T uncertainty is 1SE	-2.433	-0.947	29.9337	-2.36	0.5	1.03171	-1.71802	Kim et al.,(2007)	-2.2899	Grossman and Ku (1986)	Seymour Island	La Meseta Fm.	Bartonian	Eocene	41		-70.62			Eurhomalea	Douglas et al., (2014).
0108E5							3	0.704	0.009	0.011	0.767	10.9	2.1		Zaarur et al. (2013).	T uncertainty is 1SE	-1.076	-0.554	30.3389	-2.59	0.5	1.03232	-1.91707	Kim et al.,(2007)	-2.51902	Grossman and Ku (1986)	Seymour Island	La Meseta Fm.	Bartonian	Eocene	41		-70.62			Eurhomalea	Douglas et al., (2014).
0143E3							5	0.678	0.008	0.009	0.739	16.7	1.8		Zaarur et al. (2013).	T uncertainty is 1SE	1.233	-0.073	30.8347	-0.75	0.39	1.03102	-0.178158	Kim et al.,(2007)	-0.701618	Grossman and Ku (1986)	Seymour Island	La Meseta Fm.	Lutetian	Eocene	42		-70.62			Eurhomalea	Douglas et al., (2014).
0143E5							2	0.688	0.004	0.013	0.75	14.4	0.8		Zaarur et al. (2013).	T uncertainty is 1SE	1.642	0.257	31.1749	-0.98	0.24	1.03153	-0.34156	Kim et al.,(2007)	-0.901571	Grossman and Ku (1986)	Seymour Island	La Meseta Fm.	Lutetian	Eocene	42		-70.62			Eurhomalea	Douglas et al., (2014).
0124E4							3	0.684	0.012	0.011	0.746	15.2	2.8		Zaarur et al. (2013).	T uncertainty is 1SE	-0.682	-0.464	30.4317	-1.48	0.68	1.03135	-0.889776	Kim et al.,(2007)	-1.43824	Grossman and Ku (1986)	Seymour Island	La Meseta Fm.	Lutetian	Eocene	44		-70.62			Eurhomalea	Douglas et al., (2014).
J1												9				Non equilibrium in Corals? (Bajnai et al 2020 Nature comm.)											Ostromice, Poland (53.8°N,14.8°E		Oxfordian	Upper Jurassic	160.3					Coral	Gothmann et al. (2015)GCA
J4												23				Non equilibrium in Corals? (Bajnai et al 2020 Nature comm.)											Hohenferchesar, Germany		Oxfordian	Upper Jurassic	161.5					Coral	Gothmann et al. (2015)GCA
BF-PD-ANOa							3				0.730868	13.3862	3.27565		Defliese et al. (2015)		-0.264333	-1.0735	29.8033	-1.14199		1.03175	-1.89087	Kim et al.,(2007)	-2.46568	Grossman and Ku (1986)	Burches Ferry	Pee Dee	Maastrichtian	Latest Cretaceous	71.36		33.04	2.6		Anomia sp.	Meyer et al., (2018)
BF-PD-BELa							3				0.741562	10.324	5.89058		Defliese et al. (2015)		-0.244333	0.211031	31.1276	-0.57539		1.03332	-2.12612	Coplen (2007)			Burches Ferry	Pee Dee	Maastrichtian	Latest Cretaceous	71.36		33.04	2.6		Belemnitella americana	Meyer et al., (2018)
BF-PD-BELb							6				0.727415	14.8609	4.3321		Defliese et al. (2015)		-0.225833	-0.370616	30.5279	-0.169492		1.03233	-1.74164	Coplen (2007)			Burches Ferry	Pee Dee	Maastrichtian	Latest Cretaceous	71.36		33.04	2.6		Belemnitella americana	Meyer et al., (2018)
BF-PD-BELc							4				0.7082	20.8345	2.6255		Defliese et al. (2015)		-0.03925	-0.129586	30.7764	1.39888		1.03106	-0.274434	Coplen (2007)			Burches Ferry	Pee Dee	Maastrichtian	Latest Cretaceous	71.36		33.04	2.6		Belemnitella americana	Meyer et al., (2018)
BF-PD-EXOa							3				0.716123	18.2491	4.34173		Defliese et al. (2015)		0.530333	-1.56775	29.2938	-0.597737		1.02989	-0.580794	Kim and O'Neil (1997)	-0.897264	Epstein et al., (1953)	Burches Ferry	Pee Dee	Maastrichtian	Latest Cretaceous	71.36		33.04	2.6		Exogyra costata	Meyer et al., (2018)
BF-PD-EXOb							3				0.732873	12.6566	1.18378		Defliese et al. (2015)		0.642333	-2.07418	28.7717	-2.28918		1.03114	-2.29638	Kim and O'Neil (1997)	-2.72493	Epstein et al., (1953)	Burches Ferry	Pee Dee	Maastrichtian	Latest Cretaceous	71.36		33.04	2.6		Exogyra costata	Meyer et al., (2018)
BF-PD-EXOc							6				0.74426	9.55766	3.94848		Defliese et al. (2015)		0.2475	-1.48853	29.3755	-2.45353		1.03185	-2.40095	Kim and O'Neil (1997)	-2.92629	Epstein et al., (1953)	Burches Ferry	Pee Dee	Maastrichtian	Latest Cretaceous	71.36		33.04	2.6		Exogyra costata	Meyer et al., (2018)
BF-PD-EXOd							4				0.725747	15.109	3.61616		Defliese et al. (2015)		0.2405	-1.91542	28.9354	-1.62066		1.03059	-1.60196	Kim and O'Neil (1997)	-1.97249	Epstein et al., (1953)	Burches Ferry	Pee Dee	Maastrichtian	Latest Cretaceous	71.36		33.04	2.6		Exogyra costata	Meyer et al., (2018)
BF-PD-EXOe							8				0.721122	16.6562	2.6048		Defliese et al. (2015)		-1.16887	-0.148108	30.7573	0.474984		1.03024	0.499935	Kim and O'Neil (1997)	0.157604	Epstein et al., (1953)	Burches Ferry	Pee Dee	Maastrichtian	Latest Cretaceous	71.36		33.04	2.6		Exogyra costata	Meyer et al., (2018)
ML-CLA-OSTa							4				0.718468	17.0163	5.43602		Defliese et al. (2015)		2.534	-0.748758	30.1381	-0.0356378		1.03016	-0.0239043	Kim and O'Neil (1997)	-0.359839	Epstein et al., (1953)	Moscow Landing	Clayton	Danian	Paleocene	66		33.23	2.4		Ostrea pulaskensis	Meyer et al., (2018)
ML-CLA-OSTb							3				0.724317	15.0178	2.44558		Defliese et al. (2015)		2.53733	-0.821404	30.0632	-0.526756		1.03061	-0.52739	Kim and O'Neil (1997)	-0.900133	Epstein et al., (1953)	Moscow Landing	Clayton	Danian	Paleocene	66		33.23	2.4		Ostrea pulaskensis	Meyer et al., (2018)
ML-CLA-OSTc							3				0.719605	16.5807	2.96565		Defliese et al. (2015)		2.35367	-0.855401	30.0282	-0.227267		1.03026	-0.224025	Kim and O'Neil (1997)	-0.5672	Epstein et al., (1953)	Moscow Landing	Clayton	Danian	Paleocene	66		33.23	2.4		Ostrea pulaskensis	Meyer et al., (2018)
ML-CLA-OSTd							3				0.714536	18.1937	1.60071		Defliese et al. (2015)		2.089	-2.32243	28.5158	-1.34227		1.0299	-1.34796	Kim and O'Neil (1997)	-1.66449	Epstein et al., (1953)	Moscow Landing	Clayton	Danian	Paleocene	66		33.23	2.4		Ostrea pulaskensis	Meyer et al., (2018)
MC-PRB-EXOa							4				0.702871	22.1901	1.78589		Defliese et al. (2015)		0.908	-1.40305	29.4636	0.412529		1.02904	0.409704	Kim and O'Neil (1997)	0.135633	Epstein et al., (1953)	Marengo County	Prairie Bluff	Maastrichtian	Latest Cretaceous	69.5		33.81	2.6		Exogyra costata	Petersen et al, (2016)
MC-PRB-EXOb							4				0.700839	22.8748	1.27834		Defliese et al. (2015)		1.10775	-1.38333	29.4839	0.576768		1.0289	0.570751	Kim and O'Neil (1997)	0.301633	Epstein et al., (1953)	Marengo County	Prairie Bluff	Maastrichtian	Latest Cretaceous	69.5		33.81	2.6		Exogyra costata	Petersen et al, (2016)
ML-PRB-EXOa							4				0.725318	15.3776	6.96403		Defliese et al. (2015)		1.46625	-0.970785	29.9092	-0.694338		1.03053	-0.598844	Kim and O'Neil (1997)	-0.964256	Epstein et al., (1953)	Moscow Landing	Prairie Bluff	Maastrichtian	Latest Cretaceous	69.5		33.81	2.6		Exogyra costata	Meyer et al., (2018)
ML-PRB-EXOb							3				0.69687	24.3986	3.81367		Defliese et al. (2015)		0.141667	-0.340627	30.5588	1.9178		1.02858	1.92794	Kim and O'Neil (1997)	1.66534	Epstein et al., (1953)	Moscow Landing	Prairie Bluff	Maastrichtian	Latest Cretaceous	69.5		33.81	2.6		Exogyra costata	Meyer et al., (2018)
ML-PRB-EXOc							5				0.726737	14.4434	3.59652		Defliese et al. (2015)		0.5544	-0.47001	30.4255	-0.328884		1.03074	-0.300849	Kim and O'Neil (1997)	-0.685889	Epstein et al., (1953)	Moscow Landing	Prairie Bluff	Maastrichtian	Latest Cretaceous	69.5		33.81	2.6		Exogyra costata	Meyer et al., (2018)
ML-PRB-EXOd							4				0.724783	14.887	2.29787		Defliese et al. (2015)		0.67925	-0.611164	30.28	-0.347665		1.03064	-0.345498	Kim and O'Neil (1997)	-0.721015	Epstein et al., (1953)	Moscow Landing	Prairie Bluff	Maastrichtian	Latest Cretaceous	69.5		33.81	2.6		Exogyra costata	Meyer et al., (2018)
ML-PRB-EXOe							4				0.735505	11.6239	3.68944		Defliese et al. (2015)		0.164	-0.336458	30.5631	-0.809106		1.03138	-0.787691	Kim and O'Neil (1997)	-1.24464	Epstein et al., (1953)	Moscow Landing	Prairie Bluff	Maastrichtian	Latest Cretaceous	69.5		33.81	2.6		Exogyra costata	Meyer et al., (2018)
ML-PRB-EXOf							4				0.723249	15.57	4.14191		Defliese et al. (2015)		1.44425	-1.81415	29.0398	-1.42908		1.03048	-1.40094	Kim and O'Neil (1997)	-1.76224	Epstein et al., (1953)	Moscow Landing	Prairie Bluff	Maastrichtian	Latest Cretaceous	69.5		33.81	2.6		Exogyra costata	Meyer et al., (2018)
ML-PRB-EXOg							3				0.732135	12.4788	1.16787		Defliese et al. (2015)		0.984333	-1.03116	29.847	-1.28559		1.03118	-1.29283	Kim and O'Neil (1997)	-1.72591	Epstein et al., (1953)	Moscow Landing	Prairie Bluff	Maastrichtian	Latest Cretaceous	69.5		33.81	2.6		Exogyra costata	Meyer et al., (2018)
ML-PRB-EXOh							3				0.750028	6.6	5.2		Defliese et al. (2015)		0.486	-0.819154	30.0655	-2.428		1.03255	-2.40508	Kim and O'Neil (1997)	-3.05285	Epstein et al., (1953)	Moscow Landing	Prairie Bluff	Maastrichtian	Latest Cretaceous	69.5		33.81	2.6		Exogyra costata	Meyer et al., (2018)
ML-PRB-EXOi							3				0.739229	10.2711	1.0957		Defliese et al. (2015)		1.76633	-1.5453	29.317	-2.29005		1.03169	-2.29752	Kim and O'Neil (1997)	-2.79792	Epstein et al., (1953)	Moscow Landing	Prairie Bluff	Maastrichtian	Latest Cretaceous	69.5		33.81	2.6		Exogyra costata	Meyer et al., (2018)
CC-RIP-CRAa							3				0.711664	19.1706	1.97692		Defliese et al. (2015)	ar	1.21333	-1.25322	29.6181	-0.83357		1.03048	-0.837453	Kim et al.,(2007)	-1.31257	Grossman and Ku (1986)	Coon Creek	Ripley	Campanian	Latest Cretaceous	73.4		36.61	2.8		Crassitellites vadosis	Petersen et al. (2016), Geology
CC-RIP-CUCaU							4				0.725976	14.6487	3.80232		Defliese et al. (2015)	ar	1.21075	-0.770388	30.1158	-1.33691		1.03147	-1.31467	Kim et al.,(2007)	-1.87166	Grossman and Ku (1986)	Coon Creek	Ripley	Campanian	Latest Cretaceous	73.4		36.61	2.8		Cucullaea vulgaris	Petersen et al. (2016), Geology
CC-RIP-CUCaV							3				0.722069	15.7051	1.39896		Defliese et al. (2015)	ar	0.988	-1.37025	29.4974	-1.68086		1.03124	-1.68739	Kim et al.,(2007)	-2.2281	Grossman and Ku (1986)	Coon Creek	Ripley	Campanian	Latest Cretaceous	73.4		36.61	2.8		Cucullaea vulgaris	Petersen et al. (2016), Geology
CL-RIP-TURa							3				0.730233	13.068	0.558155		Defliese et al. (2015)	ar	1.537	-1.00246	29.8766	-1.88029		1.03183	-1.88914	Kim et al.,(2007)	-2.46795	Grossman and Ku (1986)	County Lake	Ripley	Campanian	Latest Cretaceous	73.4		36.61			Turritella paravertebroides	Petersen et al. (2016), Geology
OC-RIP-EXOa							3				0.711932	19.1818	3.68847		Defliese et al. (2015)	cc	0.890667	-1.89201	28.9595	-0.717663		1.02969	-0.708113	Kim and O'Neil (1997)	-1.01179	Epstein et al., (1953)	Owl Creek	Ripley	Campanian	Latest Cretaceous	73.4		36.4	2.7		Exogyra Costata	Petersen et al. (2016), Geology
OC-RIP-EXOb							2				0.739153	10.3014	1.92367		Defliese et al. (2015)	cc	0.7815	-2.35562	28.4816	-3.09395		1.03168	-3.10044	Kim and O'Neil (1997)	-3.60043	Epstein et al., (1953)	Owl Creek	Ripley	Campanian	Latest Cretaceous	73.4		36.4	2.7		Exogyra Costata	Petersen et al. (2016), Geology
TR-RIP-EXOa							3				0.707402	20.8273	4.88971		Defliese et al. (2015)		1.69133	-1.35125	29.517	0.154415		1.02933	0.178511	Kim and O'Neil (1997)	-0.107568	Epstein et al., (1953)	Moscow Landing	Ripley	Campanian	Latest Cretaceous	73.4		33.77	2.7		Exogyra Costata	Meyer et al., (2018)
TR-RIP-EXOb							3				0.729335	13.3758	1.59246		Defliese et al. (2015)		0.315	-1.31854	29.5507	-1.37718		1.03098	-1.3828	Kim and O'Neil (1997)	-1.79269	Epstein et al., (1953)	Moscow Landing	Ripley	Campanian	Latest Cretaceous	73.4		33.77	2.7		Exogyra Costata	Meyer et al., (2018)
TR-RIP-EXOc							3				0.717749	17.1468	2.12558		Defliese et al. (2015)		1.15333	-1.72779	29.1288	-0.972801		1.03013	-0.97573	Kim and O'Neil (1997)	-1.30882	Epstein et al., (1953)	Moscow Landing	Ripley	Campanian	Latest Cretaceous	73.4		33.77	2.7		Exogyra Costata	Meyer et al., (2018)
TR-RIP-EXOd							3				0.70504	21.5292	3.70042		Defliese et al. (2015)		-0.479667	-1.31148	29.558	0.355163		1.02918	0.36446	Kim and O'Neil (1997)	0.0847925	Epstein et al., (1953)	Moscow Landing	Ripley	Campanian	Latest Cretaceous	73.4		33.77	2.7		Exogyra Costata	Meyer et al., (2018)
TR-RIP-EXOe							2				0.71011	19.7413	4.07693		Defliese et al. (2015)		0.363	-0.935424	29.9457	0.365029		1.02957	0.367456	Kim and O'Neil (1997)	0.0693062	Epstein et al., (1953)	Moscow Landing	Ripley	Campanian	Latest Cretaceous	73.4		33.77	2.7		Exogyra Costata	Meyer et al., (2018)
SR-CUS-EXOa							4				0.72742	14.0578	2.48265		Defliese et al. (2015)		0.44525	-1.52501	29.3379	-1.44447		1.03082	-1.44005	Kim and O'Neil (1997)	-1.83364	Epstein et al., (1953)	Shopton Roadcut	Cusseta	Campanian	Latest Cretaceous	73.4		33.03			Exogyra cancellata	Meyer et al., (2018)
SR-CUS-OSTa							4				0.726492	14.4082	3.10923		Defliese et al. (2015)		1.3405	-1.79875	29.0557	-1.64949		1.03074	-1.63746	Kim and O'Neil (1997)	-2.02307	Epstein et al., (1953)	Shopton Roadcut	Cusseta	Campanian	Latest Cretaceous	73.4		33.03			Agerostrea mesenterica	Meyer et al., (2018)
SA-DEM-ANOa							4				0.694203	25.3714	3.35598		Defliese et al. (2015)		1.736	-2.24786	28.5927	0.201205		1.02917	-0.563509	Kim et al.,(2007)	-0.878464	Grossman and Ku (1986)	Safford	Demopolis	Campanian	Latest Cretaceous	73.2		33.45	2.7		Anomia sp.	Meyer et al., (2018)
SA-DEM-EXOa							4				0.718256	17.5363	6.09674		Defliese et al. (2015)		1.34375	-2.26566	28.5743	-1.50357		1.03005	-1.4309	Kim and O'Neil (1997)	-1.75735	Epstein et al., (1953)	Safford	Demopolis	Campanian	Latest Cretaceous	73.2		33.45	2.7		Exogyra cancellata	Meyer et al., (2018)
SA-DEM-OSTa							2				0.690343	27.1761	5.35993		Defliese et al. (2015)		1.828	-1.53439	29.3282	1.28336		1.028	1.29245	Kim and O'Neil (1997)	1.04174	Epstein et al., (1953)	Safford	Demopolis	Campanian	Latest Cretaceous	73.2		33.45	2.7		Agerostrea mesenterica	Meyer et al., (2018)
SC-DEM-ANOa							3				0.726019	14.4979	2.93634		Defliese et al. (2015)		2.39533	-1.37114	29.4965	-1.1936		1.03151	-1.94758	Kim et al.,(2007)	-2.50715	Grossman and Ku (1986)	Sumter County	Demopolis	Campanian	Latest Cretaceous	73.2		34.04	2.7		Anomia tellinoides	Meyer et al., (2018)
SC-DEM-EXOb							4				0.739947	10.0831	1.67865		Defliese et al. (2015)		1.43575	-2.54878	28.2825	-3.33959		1.03173	-3.34232	Kim and O'Neil (1997)	-3.84994	Epstein et al., (1953)	Sumter County	Demopolis	Campanian	Latest Cretaceous	73.2		34.04	2.7		Exogyra costata	Meyer et al., (2018)
BB-NAV-MESa							4				0.728667	13.6443	2.31718		Defliese et al. (2015)		2.318	-0.16663	30.7382	-0.174577		1.03092	-0.17208	Kim and O'Neil (1997)	-0.575401	Epstein et al., (1953)	Big Brook	Navesink	Maastrichtian	Latest Cretaceous	70.7		37.48	2.6		Agerostrea mesenterica	Meyer et al., (2018)
CC-NAV-EXOa							5				0.765636	2.89877	4.45387		Defliese et al. (2015)		0.8006	-0.98998	29.8894	-3.49241		1.03344	-3.43718	Kim and O'Neil (1997)	-4.29507	Epstein et al., (1953)	Crosswicks Creek	Navesink	Maastrichtian	Latest Cretaceous	70.7		37.37	2.6		Exogyra cancellata	Meyer et al., (2018)
PB-NAV-EXOa							5				0.751927	6.63487	3.03882		Defliese et al. (2015)		1.6116	-0.830641	30.0537	-2.4289		1.03254	-2.40854	Kim and O'Neil (1997)	-3.05466	Epstein et al., (1953)	Poricy Brook	Navesink	Maastrichtian	Latest Cretaceous	70.7		37.5	2.6		Exogyra costata	Meyer et al., (2018)
PB-NAV-MESa							5				0.761322	3.7693	1.75493		Defliese et al. (2015)		2.1136	-0.286039	30.6151	-2.53097		1.03323	-2.53019	Kim and O'Neil (1997)	-3.33058	Epstein et al., (1953)	Poricy Brook	Navesink	Maastrichtian	Latest Cretaceous	70.7		37.5	2.6		Agerostrea mesenterica	Meyer et al., (2018)
A4716-unio							5				0.73227	12.9332	2.52088		Defliese et al. (2015)	ar	-4.4244	-20.2166	10.0687	-21.1198		1.03186	-21.1148	Kim et al.,(2007)	-21.7131	Grossman and Ku (1986)	A4716 Ziebach	Hell Creek	Maastrichtian	Latest Cretaceous			48.72			Unio sp.	Petersen et al. (2016), Geology		Freshwater (1)
D5453-camp							4				0.733379	12.5489	2.82576		Defliese et al. (2015)	ar	-5.02575	-9.27705	21.3463	-10.2687		1.03194	-10.2686	Kim et al.,(2007)	-10.8621	Grossman and Ku (1986)	D5453 Carbon	Lance	Maastrichtian	Latest Cretaceous			46.7			Campeloma whitei	Petersen et al. (2016), Geology		Freshwater (2)
D5453-campB							3				0.734929	12.0776	3.43654		Defliese et al. (2015)	ar	-3.72433	-9.42351	21.1953	-10.5194		1.03205	-10.5173	Kim et al.,(2007)	-11.1172	Grossman and Ku (1986)	D5453 Carbon	Lance	Maastrichtian	Latest Cretaceous			46.7			Campeloma whitei	Petersen et al. (2016), Geology		Freshwater (2)
D5453-ples							3				0.728973	13.9705	3.50494		Defliese et al. (2015)	ar	-4.54567	-8.2916	22.3622	-8.98088		1.03162	-8.97715	Kim et al.,(2007)	-9.54914	Grossman and Ku (1986)	D5453 Carbon	Lance	Maastrichtian	Latest Cretaceous			46.7			Plesielliptio postbiplicatus	Petersen et al. (2016), Geology		Freshwater (2)
10022-unioA							3				0.721639	16.2603	3.59234		Defliese et al. (2015)	ar	-5.85067	-8.13448	22.5242	-8.32509		1.03112	-8.33166	Kim et al.,(2007)	-8.86442	Grossman and Ku (1986)	10022 Valley	Lance	Maastrichtian	Latest Cretaceous			52.17			Fusconaia brachyopistha	Petersen et al. (2016), Geology		Freshwater (2)
10022-unioB							4				0.725439	15.2319	3.86931		Defliese et al. (2015)	ar	-5.865	-8.3639	22.2877	-8.80122		1.03134	-8.77943	Kim et al.,(2007)	-9.33079	Grossman and Ku (1986)	10023 Valley	Lance	Maastrichtian	Latest Cretaceous			52.17			Fusconaia brachyopistha	Petersen et al. (2016), Geology		Freshwater (2)
16002-ano							4				0.746404	8.51348	2.70859		Defliese et al. (2015)	ar	1.218	-6.09078	24.631	-7.97099		1.03287	-7.97547	Kim et al.,(2007)	-8.60569	Grossman and Ku (1986)	16002 Kidder	Fox Hills (upper)	Maastrichtian	Latest Cretaceous			50.18			Anomia micronema	Petersen et al. (2016), Geology		Estuarine
16002-corbA							3				0.752008	6.81145	3.25226		Defliese et al. (2015)	ar	0.0186667	-5.25467	25.493	-7.51518		1.03327	-7.52406	Kim et al.,(2007)	-8.16176	Grossman and Ku (1986)	16003 Kidder	Fox Hills (upper)	Maastrichtian	Latest Cretaceous			50.18			Corbicula cleburni	Petersen et al. (2016), Geology		Estuarine
16002-corbB							3				0.741923	9.9498	3.35902		Defliese et al. (2015)	ar	1.47467	-6.23684	24.4804	-7.80858		1.03254	-7.80175	Kim et al.,(2007)	-8.4208	Grossman and Ku (1986)	16004 Kidder	Fox Hills (upper)	Maastrichtian	Latest Cretaceous			50.18			Corbicula cleburni	Petersen et al. (2016), Geology		Estuarine
6113-Luna							5				0.749662	7.76487	3.57468		Defliese et al. (2015)	ar	0.9236	-3.0882	27.7264	-5.17552		1.03304	-5.14692	Kim et al.,(2007)	-5.7756	Grossman and Ku (1986)	6113 Corson	Fox Hills (upper)	Maastrichtian	Latest Cretaceous			49.24			Lunati subcrassa	Petersen et al. (2016), Geology		Estuarine
6113-ost							4				0.750839	7.35347	3.56133		Defliese et al. (2015)	cc	0.504	-4.74836	26.0149	-6.17561		1.03237	-6.15597	Kim and O'Neil (1997)	-6.77469	Epstein et al., (1953)	6114 Corson	Fox Hills (upper)	Maastrichtian	Latest Cretaceous			49.24			Ostrea subtrigonalis	Petersen et al. (2016), Geology		Estuarine
6113-Tamer							3				0.755944	5.80243	3.79663		Defliese et al. (2015)	ar	0.17	-2.06576	28.7804	-4.58501		1.03351	-4.57243	Kim et al.,(2007)	-5.20533	Grossman and Ku (1986)	6115 Corson	Fox Hills (upper)	Maastrichtian	Latest Cretaceous			49.24			Tancredia americana	Petersen et al. (2016), Geology		Estuarine
16216-biv							5				0.723571	15.8536	3.2443		Defliese et al. (2015)	ar	2.5618	-3.34158	27.4652	-3.65059		1.0312	-3.62638	Kim et al.,(2007)	-4.16521	Grossman and Ku (1986)	16216 Larimer	Fox Hills (upper)	Maastrichtian	Latest Cretaceous			45.1			Bivalvia indet	Petersen et al. (2016), Geology		Estuarine
A120-cymb							3				0.743566	9.35409	3.34124		Defliese et al. (2015)	ar	-0.698667	-1.14323	29.7314	-2.84203		1.03267	-2.84902	Kim et al.,(2007)	-3.46445	Grossman and Ku (1986)	A120 Emmons	Fox Hills, Timber Lake	Maastrichtian	Latest Cretaceous			49.5			Cymbophora warrenana	Petersen et al. (2016), Geology		Shallow Marine WIS
A120-C1-cuc							3				0.758808	4.86394	3.18342		Defliese et al. (2015)	ar	1.332	-2.59676	28.233	-5.31449		1.03373	-5.31734	Kim et al.,(2007)	-5.95258	Grossman and Ku (1986)	A120 Emmons	Fox Hills, Timber Lake	Maastrichtian	Latest Cretaceous			49.5			Cucullaea nabrascensis	Petersen et al. (2016), Geology		Shallow Marine WIS
SB1-crass							3				0.734659	12.136	3.43959		Defliese et al. (2015)	cc	0.897667	-3.22753	27.5827	-3.5626		1.03126	-3.56419	Kim and O'Neil (1997)	-4.00748	Epstein et al., (1953)	Shell Buttes	Fox Hills, Timber Lake	Maastrichtian	Latest Cretaceous			49.98			Crassostrea sp.	Petersen et al. (2016), Geology		Shallow Marine WIS
A131-Tamer							4				0.73837	11.1379	3.7072		Defliese et al. (2015)	ar	0.2995	-2.01613	28.8316	-3.34508		1.03226	-3.32469	Kim et al.,(2007)	-3.92634	Grossman and Ku (1986)	A131 Eastern Sioux	Fox Hills, Timber Lake	Maastrichtian	Latest Cretaceous			49.72			Tancredia americana	Petersen et al. (2016), Geology		Shallow Marine WIS
A500-dos							3				0.730418	13.4507	3.48814		Defliese et al. (2015)	ar	-0.332333	-1.08936	29.787	-1.88816		1.03174	-1.89268	Kim et al.,(2007)	-2.46666	Grossman and Ku (1986)	A500 Dewey	Fox Hills, Timber Lake	Maastrichtian	Latest Cretaceous			48.95			Dosiniopsis	Petersen et al. (2016), Geology		Shallow Marine WIS
D7904-cymb							4				0.749183	7.73782	2.68463		Defliese et al. (2015)	ar	-0.3485	-4.30249	26.4746	-6.36864		1.03305	-6.36478	Kim et al.,(2007)	-6.99612	Grossman and Ku (1986)	D7904 Elbert	Fox Hills (lower)	Maastrichtian	Latest Cretaceous			43.54			Cymbophora warrenana	Petersen et al. (2016), Geology		Shallow Marine WIS
D7904-tamer							4				0.758232	5.1767	3.47929		Defliese et al. (2015)	ar	1.03625	-4.54322	26.2264	-7.20583		1.03365	-7.18672	Kim et al.,(2007)	-7.82697	Grossman and Ku (1986)	D7904 Elbert	Fox Hills (lower)	Maastrichtian	Latest Cretaceous			43.54			Tancredia americana	Petersen et al. (2016), Geology		Shallow Marine WIS
A4654-biv							3				0.756037	5.64759	3.21118		Defliese et al. (2015)	ar	1.734	-1.48184	29.3824	-4.01937		1.03354	-4.02545	Kim et al.,(2007)	-4.6571	Grossman and Ku (1986)	A 4654 Corson	Fox Hills, Trail City Mbr.	Maastrichtian	Latest Cretaceous			49.14			Bivalvia indet	Petersen et al. (2016), Geology		Shallow Marine WIS
A4654-gas							3				0.754048	6.23592	3.23135		Defliese et al. (2015)	ar	0.503667	-1.10058	29.7754	-3.50542		1.0334	-3.51059	Kim et al.,(2007)	-4.14028	Grossman and Ku (1986)	A 4654 Corson	Fox Hills, Trail City Mbr.	Maastrichtian	Latest Cretaceous			49.14			Gatropoda indet	Petersen et al. (2016), Geology		Shallow Marine WIS
ChurchAR-biv							3				0.722949	15.8273	3.57646		Defliese et al. (2015)	ar	-1.55967	-1.10347	29.7724	-1.38704		1.03121	-1.39456	Kim et al.,(2007)	-1.93317	Grossman and Ku (1986)	Colorado Springs	Pierre Shale	Maastrichtian	Latest Cretaceous			43.06			Bivalvia indet	Petersen et al. (2016), Geology		Deep Marine WIS
BCL-biv							3				0.737715	11.2045	3.40531		Defliese et al. (2015)	ar	-0.266333	-0.827706	30.0567	-2.12423		1.03225	-2.12314	Kim et al.,(2007)	-2.72258	Grossman and Ku (1986)	Colorado Springs	Pierre Shale	Maastrichtian	Latest Cretaceous			43.06			Bivalvia indet	Petersen et al. (2016), Geology		Deep Marine WIS
Cen1405-blue							3				0.741424	10.0852	3.36445		Defliese et al. (2015)	ar	0.0576667	-1.06531	29.8118	-2.61243		1.0325	-2.60831	Kim et al.,(2007)	-3.21808	Grossman and Ku (1986)	Colorado Springs	Pierre Shale	Maastrichtian	Latest Cretaceous			43.08			Bivalvia indet	Petersen et al. (2016), Geology		Deep Marine WIS
D4153-ost							3				0.708492	20.6715	3.75839		Defliese et al. (2015)	cc	2.37233	-2.4876	28.3455	-0.988237		1.02937	-0.992069	Kim and O'Neil (1997)	-1.27799	Epstein et al., (1953)	D4153 Sandoval	Lewis Shale	Campanian	Latest Cretaceous			40.03			Ostrea patina	Petersen et al. (2016), Geology		Deep Marine WIS
RT15					0.701891		7					13.1669	2.56558		Wacker et al. (2014)		0.38	-1.55	29.3121			1.03269	-3.27573	Coplen (2007)			Tarkh Pr.		Kimmeridgian	Upper Jurassic			48.71	54.06	43.85	Cylindroteuthis cuspidata	Wiersbowski et al. (2018)
RT16					0.689147		6					17.8529	2.93095		Wacker et al. (2014)		1.28	-1.36	29.508			1.03168	-2.10999	Coplen (2007)			Tarkh Pr.		Kimmeridgian	Upper Jurassic			48.71	54.06	43.85	Cylindroteuthis cuspidata	Wiersbowski et al. (2018)
RT20					0.698622		7					14.3473	1.05018		Wacker et al. (2014)		2.28	-1.71	29.1472			1.03244	-3.18675	Coplen (2007)			Tarkh Pr.		Kimmeridgian	Upper Jurassic			48.71	54.06	43.85	indet	Wiersbowski et al. (2018)
RT17					0.688465		6					18.1105	1.70292		Wacker et al. (2014)		1.32	-1.3	29.5698			1.03163	-1.99726	Coplen (2007)			Tarkh Pr.		Kimmeridgian	Upper Jurassic			48.71	54.06	43.85	Cylindriteuthis cuspidata	Wiersbowski et al. (2018)
RT10					0.689636		7					17.6691	2.20357		Wacker et al. (2014)		2.14	-1.33	29.5389			1.03172	-2.11772	Coplen (2007)			Tarkh Pr.		Kimmeridgian	Upper Jurassic			48.71	54.06	43.85	indet	Wiersbowski et al. (2018)
RMII43					0.700502		8					13.6666	2.89377		Wacker et al. (2014)		2.54	-0.76	30.1265			1.03259	-2.38149	Coplen (2007)			Mikhalen.		Kimmeridgian	Upper Jurassic			50.36	55.71	45.5	Pachyteuthis (P.) panderiana	Wiersbowski et al. (2018)
RM98a					0.691963		6					16.7977	1.95976		Wacker et al. (2014)		2.88	-1.08	29.7966			1.03191	-2.0474	Coplen (2007)			Mikhalen.		Kimmeridgian	Upper Jurassic			50.36	55.71	45.5	Pachyteuthis sp.	Wiersbowski et al. (2018)
RMII42					0.700311		7					13.7356	1.73469		Wacker et al. (2014)		2.72	-0.93	29.9513			1.03257	-2.53665	Coplen (2007)			Mikhalen.		Kimmeridgian	Upper Jurassic			50.36	55.71	45.5	Pachyteuthis cf (P.) excentralis	Wiersbowski et al. (2018)
RM15					0.694121		8					15.9966	2.33238		Wacker et al. (2014)		2.28	0.1	31.0131			1.03208	-1.03465	Coplen (2007)			Mikhalen.		Oxfordian	Upper Jurassic			50.36	55.71	45.5	Pachyteuthis (P.) excentralis	Wiersbowski et al. (2018)
RM1					0.677594		9					22.3066	1.76826		Wacker et al. (2014)		2.93	0.24	31.1574			1.03076	0.390058	Coplen (2007)			Mikhalen.		Oxfordian	Upper Jurassic			50.36	55.71	45.5	Pachyteuthis (Boreiotheuthis) absoluta	Wiersbowski et al. (2018)
RM100b					0.693312		8					16.2961	1.71969		Wacker et al. (2014)		2.25	0.4	31.3224			1.03202	-0.672777	Coplen (2007)			Mikhalen.		Oxfordian	Upper Jurassic			50.36	55.71	45.5	Pachyteuthis sp.	Wiersbowski et al. (2018)
RMII92					0.710817		5					10.0159	1.48497		Wacker et al. (2014)		1.42	1.63	32.5904			1.03339	-0.777207	Coplen (2007)			Makar'ev		Oxfordian	Upper Jurassic			50.14	55.49	45.28	Pachyteuthis sp.	Wiersbowski et al. (2018)
RMII52a					0.700663		10					13.6084	2.27481		Wacker et al. (2014)		3.31	1.66	32.6213			1.0326	0.0222622	Coplen (2007)			Makar'ev		Oxfordian	Upper Jurassic			50.14	55.49	45.28	Pachyteuthis (P.) panderiana	Wiersbowski et al. (2018)
RMII50					0.69878		13					14.2898	1.13557		Wacker et al. (2014)		2.29	-1.78	29.075			1.03155	-2.40111	Kim et al.,(2007)	-2.96397	Grossman and Ku (1986)	Makar'ev		Oxfordian	Upper Jurassic			50.14	55.49	45.28	Ammonite	Wiersbowski et al. (2018)
RMII103b					0.715876		5					8.27583	3.59245		Wacker et al. (2014)		3.45	-1.48	29.3843			1.03292	-3.4269	Kim et al.,(2007)	-4.04967	Grossman and Ku (1986)	Makar'ev		Oxfordian	Upper Jurassic			50.14	55.49	45.28	Ammonite	Wiersbowski et al. (2018)
RMII63					0.680792		7					21.0533	3.08394		Wacker et al. (2014)		2.81	1.61	32.5697			1.03101	1.50897	Coplen (2007)			Makar'ev		Oxfordian	Upper Jurassic			50.14	55.49	45.28	Pachyteuthis (P.) miatschkoviensis	Wiersbowski et al. (2018)
R96					0.691561		7					16.9478	2.28687		Wacker et al. (2014)		2.32	0.96	31.8997			1.03188	0.0216614	Coplen (2007)			Dubiki		Oxfordian	Upper Jurassic			45.51	50.89	40.67	Hibolithes sp.	Wiersbowski et al. (2018)
R124					0.693682		6					16.1591	2.75013		Wacker et al. (2014)		1.86	1.62	32.5801			1.03205	0.517419	Coplen (2007)			Dubiki		Oxfordian	Upper Jurassic			45.51	50.89	40.67	Cylindroteuthis sp.	Wiersbowski et al. (2018)
R134a					0.687011		7					18.6612	3.02125		Wacker et al. (2014)		2.95	1.63	32.5904			1.03151	1.0435	Coplen (2007)			Dubiki		Oxfordian	Upper Jurassic			45.51	50.89	40.67	Cylindroteuthis sp.	Wiersbowski et al. (2018)
R48/1					0.699935		9					13.8713	2.40947		Wacker et al. (2014)		2.7	1.2	32.1471			1.03165	0.486273	Kim et al.,(2007)	-0.0803845	Grossman and Ku (1986)	Dubiki		Oxfordian	Upper Jurassic			45.51	50.89	40.67	Ammonite (Cardioceras sp.?)	Wiersbowski et al. (2018)
R137a					0.68477		6					19.5164	1.77587		Wacker et al. (2014)		2.06	0.89	31.8275			1.03133	0.478264	Coplen (2007)			Dubiki		Oxfordian	Upper Jurassic			45.51	50.89	40.67	Hibolithes sp.	Wiersbowski et al. (2018)
R37					0.688053		5					18.2661	2.16654		Wacker et al. (2014)		1.82	1.71	32.6728			1.0316	1.04253	Coplen (2007)			Dubiki		Callovian	Middle Jurassic			45.51	50.89	40.67	Cylindroteuthis sp.	Wiersbowski et al. (2018)
R150					0.697403		4					14.7913	2.36596		Wacker et al. (2014)		2.59	1.97	32.9409			1.03234	0.581131	Coplen (2007)			Dubiki		Callovian	Middle Jurassic			45.51	50.89	40.67	Cylindroteuthis sp.	Wiersbowski et al. (2018)
R111/1					0.701437		6					13.3297	2.92732		Wacker et al. (2014)		2.27	0.31	31.2296			1.03177	-0.520801	Kim et al.,(2007)	-1.09518	Grossman and Ku (1986)	Dubiki		Callovian	Middle Jurassic			45.51	50.89	40.67	ammonite (Sublunuloceras sp.)	Wiersbowski et al. (2018)
KH18-10.50			0.706573				5					19.0517	1.49271		Petersen et al., (2019)		0.218338	-1.54868	29.3135	-2.05378		1.03143	-2.05376	Coplen (2007)			Boyarka		Valanginian	Early Cretaceous			74			Acrotheuthis sp.	Price et al., (2020)
KH18-11.20			0.700995				5					20.8855	2.05407		Petersen et al., (2019)		1.12458	-0.475267	30.42	-0.609805		1.03105	-0.6098	Coplen (2007)			Boyarka		Valanginian	Early Cretaceous			74			indet	Price et al., (2020)
KH18-27.00			0.713026				6					16.9724	1.7855		Petersen et al., (2019)		0.955226	0.0269731	30.9378	-0.905405		1.03187	-0.905405	Coplen (2007)			Boyarka		Valanginian	Early Cretaceous			74			Lagonibelus sp.	Price et al., (2020)
KH18-2.85			0.699376				5					21.4244	3.0173		Petersen et al., (2019)		0.377057	0.0685481	30.9807	0.0421883		1.03094	0.0421876	Coplen (2007)			Boyarka		Valanginian	Early Cretaceous			74			indet.	Price et al., (2020)
KH18-7.10			0.709093				5					18.2343	2.36055		Petersen et al., (2019)		0.602349	-2.18551	28.657	-2.85686		1.0316	-2.85683	Coplen (2007)			Boyarka		Valanginian	Early Cretaceous			74			Pachyteuthis sp.	Price et al., (2020)
YCL214-031			0.669537				6					31.9166	4.61418		Petersen et al., (2019)		-1.24565	-0.565754	30.3268	1.44031		1.02884	1.44032	Coplen (2007)			Caravaca		Valanginian	Early Cretaceous			24			Berriasibelus sp.	Price et al., (2020)
YG14-015			0.670872				3					31.4231	2.6333		Petersen et al., (2019)		0.504191	0.365935	31.2872	2.28124		1.02894	2.28124	Coplen (2007)			Caravaca		Valanginian	Early Cretaceous			24			Duvalia sp.	Price et al., (2020)
YP14-005			0.691045				5					24.2445	4.44683		Petersen et al., (2019)		1.73971	-0.409379	30.488	0.124305		1.03036	0.124309	Coplen (2007)			Caravaca		Valanginian	Early Cretaceous			24			Hibolithes sp.	Price et al., (2020)
YP14-001			0.689805				6					24.6713	3.25848		Petersen et al., (2019)		-0.293711	-0.501647	30.3929	0.11585		1.03027	0.115855	Coplen (2007)			Caravaca		Valanginian	Early Cretaceous			24			Duvalia cf. lata	Price et al., (2020)
YP14-014			0.690869				4					24.305	3.0448		Petersen et al., (2019)		0.945536	-0.272438	30.6291	0.273227		1.03035	0.27323	Coplen (2007)			Caravaca		Valanginian	Early Cretaceous			24			Duvalia binervia	Price et al., (2020)
PC7-B1			0.734874				7					10.2485	1.24962		Petersen et al., (2019)		-0.487799	0.211095	31.1276	-2.14238		1.03334	-2.14238	Coplen (2007)			Izhma		Valanginian	Early Cretaceous			59			Pachyteuthis sp.	Price et al., (2020)
PC7-C2			0.700293				6					21.1188	1.12668		Petersen et al., (2019)		0.190676	0.558573	31.4858	0.470823		1.031	0.470818	Coplen (2007)			Izhma		Valanginian	Early Cretaceous			59			Pachyteuthis sp.	Price et al., (2020)
PC9-G23			0.702347				5					20.4379	2.39937		Petersen et al., (2019)		-0.792343	0.524728	31.4509	0.299804		1.03114	0.299799	Coplen (2007)			Izhma		Valanginian	Early Cretaceous			59			indet	Price et al., (2020)
PC9-G8			0.687806				7					25.363	1.67607		Petersen et al., (2019)		1.16366	0.979031	31.9193	1.73303		1.03013	1.73302	Coplen (2007)			Izhma		Valanginian	Early Cretaceous			59			Acrotheuthis sp.	Price et al., (2020)
D2E			0.689784				2					24.6784	2.38861		Petersen et al., (2019)		-0.464603	-0.361077	30.5378	0.257896		1.03027	0.2579	Coplen (2007)			Speeton		Valanginian	Early Cretaceous			40			Acrotheuthis sp.	Price et al., (2020)
D3D			0.680221				2					28.0322	7.1288		Petersen et al., (2019)		-0.0880152	-0.209304	30.6942	1.06081		1.0296	1.06081	Coplen (2007)			Speeton		Valanginian	Early Cretaceous			40			Acrotheuthis sp.	Price et al., (2020)
D4A			0.683036				6					27.0334	1.31322		Petersen et al., (2019)		0.509365	0.409154	31.3318	1.48751		1.0298	1.48751	Coplen (2007)			Speeton		Valanginian	Early Cretaceous			40			Acrotheuthis sp.	Price et al., (2020)
SP 1181			0.711293				5					17.5266	1.4256		Petersen et al., (2019)		-0.121592	-0.595481	30.2961	-1.41309		1.03175	-1.41309	Coplen (2007)			Speeton		Valanginian	Early Cretaceous			40			Acrotheuthis sp.	Price et al., (2020)
SP 1297			0.698861				4					21.5964	1.5905		Petersen et al., (2019)		0.602248	-0.894152	29.9882	-0.886054		1.0309	-0.886046	Coplen (2007)			Speeton		Valanginian	Early Cretaceous			40			Acrotheuthis sp.	Price et al., (2020)
SP 1S22C			0.687522				5					25.4616	1.60578		Petersen et al., (2019)		0.597009	-0.356422	30.5426	0.415832		1.03011	0.415835	Coplen (2007)			Speeton		Valanginian	Early Cretaceous			40			Acrotheuthis sp.	Price et al., (2020)
59-4.68			0.69859	0.00866497		0.0169995	5					24.3819	3.31829		Wacker et al. (2014)		-0.28451	-1.24626	29.6252	-0.686014	0.651852	1.03033	-0.686002	Coplen (2007)			DSDP 511		Aptian	Early Cretaceous			-49.78	-47.05	-52.65	Belemnites	Vickers et al., (2019)		Age based on age model from TEX86 data of O'Brien et al., 2017
60-2.21			0.697121	0.00548138		0.00917512	4					24.9457	2.11068		Wacker et al. (2014)		-0.0182644	-0.331855	30.5679	0.339532	0.413456	1.03022	0.339535	Coplen (2007)			DSDP 511		Aptian	Early Cretaceous			-49.78	-47.05	-52.65	Belemnites	Vickers et al., (2019)		Age based on age model from TEX86 data of O'Brien et al., 2018
60-2.93			0.70686	0.0153558		0.0301259	5					21.2654	5.70127		Wacker et al. (2014)		-0.221308	-0.889521	29.993	-0.947736	1.14378	1.03097	-0.947727	Coplen (2007)			DSDP 511		Aptian	Early Cretaceous			-49.78	-47.05	-52.65	Belemnites	Vickers et al., (2019)		Age based on age model from TEX86 data of O'Brien et al., 2019
60-3.28			0.706755	0.0124734		0.0208788	4					21.3045	4.63147		Wacker et al. (2014)		-0.301014	-0.387755	30.5103	-0.438144	0.929272	1.03096	-0.43814	Coplen (2007)			DSDP 511		Aptian	Early Cretaceous			-49.78	-47.05	-52.65	Belemnites	Vickers et al., (2019)		Age based on age model from TEX86 data of O'Brien et al., 2020
62-5.82			0.699731	0.0100927		0.0222972	6					23.9458	3.8485		Wacker et al. (2014)		-0.520524	-2.1736	28.6692	-1.69957	0.75749	1.03042	-1.69955	Coplen (2007)			DSDP 511		Barremian	Early Cretaceous			-49.78	-47.05	-52.65	Belemnites	Vickers et al., (2019)		Age based on age model from TEX86 data of O'Brien et al., 2021
66-2.10			0.690445	0.00391084		0.00767253	5					27.5497	1.54564		Wacker et al. (2014)		-0.0704227	-1.65158	29.2074	-0.475954	0.297301	1.0297	-0.475938	Coplen (2007)			DSDP 511		Oxf-Tith	Upper Jurassic			-51.95	-47.08	-57.28	Belemnites	Vickers et al., (2019)
66-2.53			0.690563	0.00705175		0.0118037	4					27.5034	2.78612		Wacker et al. (2014)		0.301675	-1.58593	29.2751	-0.41915	0.53613	1.02971	-0.419135	Coplen (2007)			DSDP 511		Oxf-Tith	Upper Jurassic			-51.95	-47.08	-57.28	Belemnites	Vickers et al., (2019)
66-4.65			0.69865	0.00697773		0.0116798	4					24.3587	2.67124		Wacker et al. (2014)		0.0177554	-1.43325	29.4325	-0.877668	0.524704	1.03034	-0.877654	Coplen (2007)			DSDP 511		Oxf-Tith	Upper Jurassic			-51.95	-47.08	-57.28	Belemnites	Vickers et al., (2019)
66-4.119			0.697668	0.0127083		0.021272	4					24.7355	4.88584		Wacker et al. (2014)		0.269966	-1.22493	29.6472	-0.59529	0.957725	1.03026	-0.595278	Coplen (2007)			DSDP 511		Oxf-Tith	Upper Jurassic			-51.95	-47.08	-57.28	Belemnites	Vickers et al., (2019)
67-4.LTH			0.695928	0.0113974		0.0223601	5					25.4061	4.41094		Wacker et al. (2014)		-0.898043	-0.465359	30.4303	0.295981	0.861482	1.03013	0.295985	Coplen (2007)			DSDP 511		Oxf-Tith	Upper Jurassic			-51.95	-47.08	-57.28	Belemnites	Vickers et al., (2019)
70-2.125			0.689899	0.0107342		0.0179676	4					27.766	4.25336		Wacker et al. (2014)		1.44684	-0.885367	29.9973	0.332751	0.817744	1.02965	0.33276	Coplen (2007)			DSDP 511		Call-Oxf	Middle Jurassic			-51.95	-47.08	-57.28	Belemnites	Vickers et al., (2019)
SK4-2-50				0.00763326	0.667385	0.0275221	13					26.7124	5.3511		Kele et al., (2015)		3.11077	-0.163077	30.7419	0.86		1.02986	0.852563	Coplen (2007)			Herbides Basin		Callovian	Middle Jurassic			39.82	45.24	35.01	Cylindro.	Vickers et al. (2020)
SK4-0-20				0.00703118	0.6785	0.0281247	16					23.4	4.22275		Kele et al., (2015)		1.735	-0.125	30.7811	0.25		1.03053	0.242176	Coplen (2007)			Herbides Basin		Callovian	Middle Jurassic			39.82	45.24	35.01	Cylindro.	Vickers et al. (2020)
SK 4 6_80 A				0.0126963	0.683933	0.0491724	15					22.5686	8.17646		Kele et al., (2015)		2.79467	0.0335714	30.9446	0.24		1.0307	0.235789	Coplen (2007)			Herbides Basin		Callovian	Middle Jurassic			39.82	45.24	35.01	Pachy.	Vickers et al. (2020)
SK3-5-55B				0.00678568	0.664154	0.0244661	13					27.5872	4.44792		Kele et al., (2015)		2.19923	-0.0341667	30.8748	1.16		1.02969	1.15057	Coplen (2007)			Herbides Basin		Oxfordian	Upper Jurassic			39.82	45.24	35.01	Pachy.	Vickers et al. (2020)
SK 3 7_55				0.0118845	0.669846	0.0428501	13					26.5064	8.41089		Kele et al., (2015)		2.58846	0.505385	31.431	1.49		1.0299	1.48175	Coplen (2007)			Herbides Basin		Oxfordian	Upper Jurassic			39.82	45.24	35.01	Cylindro?	Vickers et al. (2020)
SK 10 12_70 A				0.0100977	0.669133	0.0391082	15					26.4963	6.40282		Kele et al., (2015)		2.55267	-0.267333	30.6344	0.72		1.02991	0.706327	Coplen (2007)			Herbides Basin		Oxfordian	Upper Jurassic			39.82	45.24	35.01	Cylindro.	Vickers et al. (2020)
SK 10 12_70 B				0.00722641	0.6947	0.0228519	10					18.7032	4.58474		Kele et al., (2015)		1.227	-1.146	29.7286	-1.71		1.03151	-1.72227	Coplen (2007)			Herbides Basin		Oxfordian	Upper Jurassic			39.82	45.24	35.01	Pachy.	Vickers et al. (2020)
SK7-3-00A				0.00657334	0.650313	0.0262933	16					31.9256	4.44702		Kele et al., (2015)		1.5125	-1.28937	29.5808	0.73		1.02884	0.716924	Coplen (2007)			Herbides Basin		Oxfordian	Upper Jurassic			39.82	45.24	35.01	Cylindro.	Vickers et al. (2020)
SK7-3-00B				0.00669493	0.661923	0.0241389	13					28.262	4.46491		Kele et al., (2015)		1.91	-1.06308	29.8141	0.26		1.02956	0.250022	Coplen (2007)			Herbides Basin		Oxfordian	Upper Jurassic			39.82	45.24	35.01	Pachy?	Vickers et al. (2020)
SK5-8-10A				0.0060879	0.6785	0.0243516	16					23.3262	3.75675		Kele et al., (2015)		2.88688	-1.41062	29.4558	-1.05		1.03055	-1.0585	Coplen (2007)			Herbides Basin		Kimmeridgian	Upper Jurassic			39.82	45.24	35.01	Cylindro.	Vickers et al. (2020)
SK1-4-50				0.0060558	0.678846	0.0218345	13					23.1816	3.90351		Kele et al., (2015)		3.1	0.699231	31.6308	1.04		1.03058	1.02341	Coplen (2007)			Herbides Basin		Oxfordian	Upper Jurassic			39.82	45.24	35.01	Pachy.	Vickers et al. (2020)
SK3-6-15D				0.00752717	0.676471	0.0310353	17					24.0761	4.64957		Kele et al., (2015)		3.88941	-0.024375	30.8849	0.49		1.03039	0.476352	Coplen (2007)			Herbides Basin		Oxfordian	Upper Jurassic			39.82	45.24	35.01	Pachy.	Vickers et al. (2020)
SK 2 105 A				0.00951084	0.6532	0.0300759	10					31.1327	6.96549		Kele et al., (2015)		2.621	0.781	31.7151	2.65		1.029	2.64241	Coplen (2007)			Herbides Basin		Oxfordian	Upper Jurassic			39.82	45.24	35.01	Pachy.	Vickers et al. (2020)
SK2 1-30b				0.00908204	0.677154	0.0327457	13					23.9186	5.70481		Kele et al., (2015)		2.42077	0.216154	31.1328	0.69		1.03043	0.685948	Coplen (2007)			Herbides Basin		Oxfordian	Upper Jurassic			39.82	45.24	35.01	Cylindro?	Vickers et al. (2020)
SK7 20-25b				0.00493634	0.661417	0.0171	12					28.2811	3.31224		Kele et al., (2015)		2.54917	-0.119167	30.7872	1.21		1.02955	1.19881	Coplen (2007)			Herbides Basin		Oxf-Kim	Upper Jurassic			39.82	45.24	35.01	Cylindro?	Vickers et al. (2020)
sk7-20-25a				0.00884538	0.664667	0.0306413	12					27.5795	5.77596		Kele et al., (2015)		2.14333	0.144167	31.0586	1.34		1.02969	1.32764	Coplen (2007)			Herbides Basin		Oxf-Kim	Upper Jurassic			39.82	45.24	35.01	Cylindro.	Vickers et al. (2020)
SK5-6-25				0.00549327	0.6848	0.0173712	10					21.3893	3.45259		Kele et al., (2015)		2.033	-1.076	29.8008	-1.1		1.03094	-1.10936	Coplen (2007)			Herbides Basin		Kimmeridgian	Upper Jurassic			39.82	45.24	35.01	Pachy.	Vickers et al. (2020)
CK_2016_carb_0012					0.635	0.02	13					36.7401	4.01089		Kele et al., (2015) (revised)		0.39	-0.91		1.97563	0.741687	reordered					Aubach	J-Marg	Pliensbachian	Lower Jurassic			38.88	42.42	35.61	Belemnite	Fernandez et al., (2021)
CK_2016_carb_0016					0.621	0.04	14					42.2154	7.84633		Kele et al., (2015) (revised)		0.76	-1.25		2.62111	1.39319	reordered					Aubach	J-Marg	Pliensbachian	Lower Jurassic			38.88	42.42	35.61	Belemnite	Fernandez et al., (2021)
CK_2016_carb_0019					0.633	0.05	13					38.5458	10.2415		Kele et al., (2015) (revised)		1.15	-0.99		2.22453	1.85881	reordered					Aubach	J-Marg	Pliensbachian	Lower Jurassic			38.88	42.42	35.61	Belemnite	Fernandez et al., (2021)
CK_2016_carb_0020					0.609	0.043	15					46.5689	9.32324		Kele et al., (2015) (revised)		1.66	-1.04		3.59298	1.61122	reordered					Aubach	J-Marg	Pliensbachian	Lower Jurassic			38.88	42.42	35.61	Belemnite	Fernandez et al., (2021)
CK_2016_carb_0025					0.639	0.026	11					35.653	5.64822		Kele et al., (2015) (revised)		2.09	-0.83		1.85587	1.04714	reordered					Aubach	J-Marg	Pliensbachian	Lower Jurassic			38.88	42.42	35.61	Belemnite	Fernandez et al., (2021)
CK_2016_carb_0052					0.627	0.035	10					39.9126	8.40509		Kele et al., (2015) (revised)		1.34	-0.44		3.02312	1.51447	reordered					Aubach	Spina	Pliensbachian	Lower Jurassic			38.88	42.42	35.61	Belemnite	Fernandez et al., (2021)
CK_2016_carb_0111					0.657	0.031	8					30.1074	7.95508		Kele et al., (2015) (revised)		0.19	-0.44		1.20465	1.52475	reordered					Aubach	Spina	Pliensbachian	Lower Jurassic			38.88	42.42	35.61	Belemnite	Fernandez et al., (2021)
CK_2016_carb_0148					0.642	0.034	16					34.7292	5.84545		Kele et al., (2015) (revised)		-0.63	-1.13		1.38409	1.08935	reordered					Aubach	Spina	Pliensbachian	Lower Jurassic			38.88	42.42	35.61	Belemnite	Fernandez et al., (2021)
CK_2016_carb_0117					0.652	0.036	11					31.6176	7.08576		Kele et al., (2015) (revised)		1.01	-0.72		1.21161	1.34549	reordered					Aubach	Spina	Pliensbachian	Lower Jurassic			38.88	42.42	35.61	Belemnite	Fernandez et al., (2021)
CK_2016_carb_0131					0.633	0.034	14					37.9357	6.62684		Kele et al., (2015) (revised)		0.43	-0.43		2.67547	1.21028	reordered					Aubach	Spina	Pliensbachian	Lower Jurassic			38.88	42.42	35.61	Belemnite	Fernandez et al., (2021)
CK_2016_carb_0138					0.625	0.03	9					40.5244	8.0834		Kele et al., (2015) (revised)		0.56	-0.9		2.67127	1.45059	reordered					Aubach	Ten	Toarcian	Lower Jurassic			38.88	42.42	35.61	Belemnite	Fernandez et al., (2021)
CK_2016_carb_0134					0.622	0.035	20					41.7342	5.63922		Kele et al., (2015) (revised)		0.71	-0.96		2.82684	1.00683	reordered					Aubach	Ten	Toarcian	Lower Jurassic			38.88	42.42	35.61	Belemnite	Fernandez et al., (2021)
CK_2016_carb_0026					0.611	0.024	12					45.2506	5.77301		Kele et al., (2015) (revised)		1.42	-1.11		3.29434	1.00853	reordered					Aubach	Ten	Toarcian	Lower Jurassic			38.88	42.42	35.61	Belemnite	Fernandez et al., (2021)
CK_2016_carb_0032					0.64	0.027	13					35.294	5.53679		Kele et al., (2015) (revised)		1.8	-1.04		1.57897	1.02875	reordered					Aubach	Ten	Toarcian	Lower Jurassic			38.88	42.42	35.61	Belemnite	Fernandez et al., (2021)
CK_2016_carb_0056					0.59	0.037	8					53.5416	11.6568		Kele et al., (2015) (revised)		3.62	-1.89		3.91585	1.92898	reordered					Aubach	Fal	Toarcian	Lower Jurassic			38.88	42.42	35.61	Belemnite	Fernandez et al., (2021)
CK_2016_carb_0053					0.598	0.024	15					50.0397	5.01769		Kele et al., (2015) (revised)		3.43	-1.83		3.39132	0.85249	reordered					Aubach	Fal	Toarcian	Lower Jurassic			38.88	42.42	35.61	Belemnite	Fernandez et al., (2021)
CK_2016_carb_0074					0.6	0.028	17					49.4351	5.43343		Kele et al., (2015) (revised)		2.8	-1.95		3.16846	0.925452	reordered					Aubach	Fal	Toarcian	Lower Jurassic			38.88	42.42	35.61	Belemnite	Fernandez et al., (2021)
CK_2016_carb_0108					0.62	0.023	12					41.8293	5.31026		Kele et al., (2015) (revised)		2.2	-2.31		1.48861	0.946842	reordered					Aubach	Fal	Toarcian	Lower Jurassic			38.88	42.42	35.61	Belemnite	Fernandez et al., (2021)
CK_2016_carb_0072					0.62	0.046	16					42.743	8.43945		Kele et al., (2015) (revised)		1.22	-1.61		2.35298	1.49263	reordered					Aubach	Bifron	Toarcian	Lower Jurassic			38.88	42.42	35.61	Belemnite	Fernandez et al., (2021)
CK_2016_carb_0095					0.624	0.03	10					40.8007	7.09131		Kele et al., (2015) (revised)		0.98	-1.64		1.97802	1.27031	reordered					Aubach	Bifron	Toarcian	Lower Jurassic			38.88	42.42	35.61	Belemnite	Fernandez et al., (2021)
CK_2016_carb_0087					0.623	0.017	10					40.6868	4.21905		Kele et al., (2015) (revised)		0.92	-1.63		1.9677	0.760362	reordered					Aubach	Bifron	Toarcian	Lower Jurassic			38.88	42.42	35.61	Belemnite	Fernandez et al., (2021)
CK_2016_carb_0099					0.622	0.033	11					41.5132	7.65559		Kele et al., (2015) (revised)		0.18	-1.48		2.2656	1.36505	reordered					Aubach	Bifron	Toarcian	Lower Jurassic			38.88	42.42	35.61	Belemnite	Fernandez et al., (2021)
L1430A1-B					0.773582	0.013	2					0.660336	1.80027		Defliese et al., 2015		-0.3235	0.704064	31.6358	-3.00616		1.03475	-3.01042	Kim et al.,(2007)	-3.62033	Grossman and Ku (1986)	Seymour Island		Danian	Paleocene	65.808		-64.29			Lahillia	Petersen et al., (2016) NatureComms
L1430A1-U					0.765639	0.013	2					2.8839	1.85399		Defliese et al., 2015		3.094	1.26826	32.2174	-1.91874		1.03421	-1.92345	Kim et al.,(2007)	-2.54379	Grossman and Ku (1986)	Seymour Island		Danian	Paleocene	65.808		-64.29			Lahillia	Petersen et al., (2016) NatureComms
C915A1-B					0.758066	0.011	3					5.05975	1.49835		Defliese et al., 2015		0.0336667	0.48666	31.4117	-2.19276		1.03368	-2.1972	Kim et al.,(2007)	-2.82404	Grossman and Ku (1986)	Seymour Island		Danian	Paleocene	65.995		-64.29			Cucullaea	Petersen et al., (2016) NatureComms
C915A1-U					0.748502	0.011	3					7.8771	1.56885		Defliese et al., 2015		-1.658	0.40842	31.331	-1.62732		1.03302	-1.63218	Kim et al.,(2007)	-2.25312	Grossman and Ku (1986)	Seymour Island		Danian	Paleocene	65.995		-64.29			Cucullaea	Petersen et al., (2016) NatureComms
C1109A-B					0.747639	0.0231527	4					8.86836	6.85598		Defliese et al., 2015		2.01725	0.964276	31.9041	-0.954362		1.03279	-0.854053	Kim et al.,(2007)	-1.46887	Grossman and Ku (1986)	Seymour Island		Maastrichtian	Latest Cretaceous	67.663		-64.29			Cucullaea	Petersen et al., (2016) NatureComms
C1109A-U					0.765521	0.0258318	4					3.73838	7.06932		Defliese et al., 2015		-1.58525	0.197109	31.1132	-2.90894		1.034	-2.79186	Kim et al.,(2007)	-3.41806	Grossman and Ku (1986)	Seymour Island		Maastrichtian	Latest Cretaceous	67.663		-64.29			Cucullaea	Petersen et al., (2016) NatureComms
C1174A-B					0.766671	0.011	3					2.62284	2.13547		Defliese et al., 2015		-0.190333	0.696369	31.6279	-2.55464		1.03427	-2.55468	Kim et al.,(2007)	-3.17583	Grossman and Ku (1986)	Seymour Island		Maastrichtian	Latest Cretaceous	66.309		-64.29			Cucullaea	Petersen et al., (2016) NatureComms
C1174A-U					0.746161	0.009	4					8.64424	2.38772		Defliese et al., 2015		-5.694	0.566263	31.4938	-1.30621		1.03284	-1.3017	Kim et al.,(2007)	-1.91852	Grossman and Ku (1986)	Seymour Island		Maastrichtian	Latest Cretaceous	66.309		-64.29			Cucullaea	Petersen et al., (2016) NatureComms
C1184A2-B					0.745104	0.011	3					8.90614	1.78786		Defliese et al., 2015		-0.151	0.639613	31.5694	-1.16572		1.03278	-1.16964	Kim et al.,(2007)	-1.78482	Grossman and Ku (1986)	Seymour Island		Maastrichtian	Latest Cretaceous	66.169		-64.29			Cucullaea	Petersen et al., (2016) NatureComms
C1184A2-U					0.746374	0.011	3					8.50349	1.16213		Defliese et al., 2015		-5.62267	0.0422321	30.9535	-1.84968		1.03287	-1.8564	Kim et al.,(2007)	-2.47498	Grossman and Ku (1986)	Seymour Island		Maastrichtian	Latest Cretaceous	66.169		-64.29			Cucullaea	Petersen et al., (2016) NatureComms
C1467A-B					0.754216	0.017808	3					6.4439	5.09626		Defliese et al., 2015		1.77	-0.205314	30.6983	-2.60183		1.03335	-2.57001	Kim et al.,(2007)	-3.19709	Grossman and Ku (1986)	Seymour Island		Maastrichtian	Latest Cretaceous	66.043		-64.29			Cucullaea	Petersen et al., (2016) NatureComms
C1467A-U					0.751289	0.011	3					7.10331	2.76378		Defliese et al., 2015		-4.77333	-0.244113	30.6583	-2.46202		1.0332	-2.45863	Kim et al.,(2007)	-3.08395	Grossman and Ku (1986)	Seymour Island		Maastrichtian	Latest Cretaceous	66.043		-64.29			Cucullaea	Petersen et al., (2016) NatureComms
C1517A-B					0.743931	0.011	3					9.31287	2.84717		Defliese et al., 2015		1.916	0.987844	31.9284	-0.734305		1.03268	-0.730835	Kim et al.,(2007)	-1.34288	Grossman and Ku (1986)	Seymour Island		Maastrichtian	Latest Cretaceous	66.202		-64.29			Cucullaea	Petersen et al., (2016) NatureComms
C1517A-U					0.728692	0.011	3					14.0266	2.40108		Defliese et al., 2015		-3.197	0.00375343	30.9139	-0.674055		1.03161	-0.67545	Kim et al.,(2007)	-1.24085	Grossman and Ku (1986)	Seymour Island		Maastrichtian	Latest Cretaceous	66.202		-64.29			Cucullaea	Petersen et al., (2016) NatureComms
C1555B-B					0.746785	0.00967954	4					8.50111	2.91072		Defliese et al., 2015		1.5345	1.11025	32.0546	-0.801928		1.03287	-0.790947	Kim et al.,(2007)	-1.40751	Grossman and Ku (1986)	Seymour Island		Maastrichtian	Latest Cretaceous	67.643		-64.29			Cucullaea	Petersen et al., (2016) NatureComms
C1555B-U					0.76096	0.010017	4					4.33085	2.80792		Defliese et al., 2015		-0.832	0.284888	31.2037	-2.57841		1.03386	-2.56683	Kim et al.,(2007)	-3.19376	Grossman and Ku (1986)	Seymour Island		Maastrichtian	Latest Cretaceous	67.643		-64.29			Cucullaea	Petersen et al., (2016) NatureComms
C1556I-B					0.725736	0.00881748	4					15.0385	2.83863		Defliese et al., 2015		0.48125	1.0939	32.0377	0.625357		1.03139	0.632673	Kim et al.,(2007)	0.0824479	Grossman and Ku (1986)	Seymour Island		Maastrichtian	Latest Cretaceous	67.83		-64.29			Cucullaea	Petersen et al., (2016) NatureComms
C1556I-U					0.733035	0.0121008	3					12.7465	3.88355		Defliese et al., 2015		-2.17633	-0.0908399	30.8164	-1.06064		1.0319	-1.0485	Kim et al.,(2007)	-1.6304	Grossman and Ku (1986)	Seymour Island		Maastrichtian	Latest Cretaceous	67.83		-64.29			Cucullaea	Petersen et al., (2016) NatureComms
C477B-B					0.735793	0.0189239	4					12.2933	6.05601		Defliese et al., 2015		-0.8985	0.619892	31.549	-0.508763		1.032	-0.437715	Kim et al.,(2007)	-1.0241	Grossman and Ku (1986)	Seymour Island		Maastrichtian	Latest Cretaceous	66.048		-64.29			Cucullaea	Petersen et al., (2016) NatureComms
C477B-U					0.750473	0.0094741	4					7.38868	2.76905		Defliese et al., 2015		-1.88325	0.268534	31.1868	-1.89198		1.03313	-1.88235	Kim et al.,(2007)	-2.50555	Grossman and Ku (1986)	Seymour Island		Maastrichtian	Latest Cretaceous	66.048		-64.29			Cucullaea	Petersen et al., (2016) NatureComms
C757C2-B					0.732164	0.011	3					12.8676	0.497317		Defliese et al., 2015		1.64333	1.34281	32.2943	0.419464		1.03187	0.410242	Kim et al.,(2007)	-0.168859	Grossman and Ku (1986)	Seymour Island		Maastrichtian	Latest Cretaceous	66.971		-64.29			Cucullaea	Petersen et al., (2016) NatureComms
C757C1-U					0.728599	0.0101823	4					14.1597	3.23077		Defliese et al., 2015		-0.6665	0.576604	31.5044	-0.0871807		1.03158	-0.0741513	Kim et al.,(2007)	-0.637333	Grossman and Ku (1986)	Seymour Island		Maastrichtian	Latest Cretaceous	66.971		-64.29			Cucullaea	Petersen et al., (2016) NatureComms
C772A-B					0.750484	0.010541	3					7.36616	3.15295		Defliese et al., 2015		2.46233	0.97085	31.9108	-1.19373		1.03314	-1.18666	Kim et al.,(2007)	-1.80842	Grossman and Ku (1986)	Seymour Island		Maastrichtian	Latest Cretaceous	68.728		-64.29			Cucullaea	Petersen et al., (2016) NatureComms
C772A-U					0.766509	0.011	3					2.63446	1.19157		Defliese et al., 2015		-1.57033	-0.183509	30.7208	-3.42374		1.03427	-3.42896	Kim et al.,(2007)	-4.05303	Grossman and Ku (1986)	Seymour Island		Maastrichtian	Latest Cretaceous	68.728		-64.29			Cucullaea	Petersen et al., (2016) NatureComms
E1109C					0.735204	0.011	3					11.9277	1.22091		Defliese et al., 2015		3.08467	1.15875	32.1046	0.0274765		1.03208	0.0202373	Kim et al.,(2007)	-0.569471	Grossman and Ku (1986)	Seymour Island		Maastrichtian	Latest Cretaceous	67.663		-64.29			Eselaevitrigonia	Petersen et al., (2016) NatureComms
E1595B					0.738751	0.011	3					10.8339	1.46493		Defliese et al., 2015		1.209	1.27772	32.2272	-0.0965541		1.03233	-0.102525	Kim et al.,(2007)	-0.702548	Grossman and Ku (1986)	Seymour Island		Maastrichtian	Latest Cretaceous	66.902		-64.29			Eselaevitrigonia	Petersen et al., (2016) NatureComms
E1609A					0.727841	0.011	3					14.2706	1.79136		Defliese et al., 2015		2.996	1.28798	32.2378	0.665967		1.03156	0.660787	Kim et al.,(2007)	0.099601	Grossman and Ku (1986)	Seymour Island		Maastrichtian	Latest Cretaceous	67.346		-64.29			Eselaevitrigonia	Petersen et al., (2016) NatureComms
E725A					0.787183	0.0145599	4					-2.79093	3.89268		Defliese et al., 2015		2.28325	1.24493	32.1934	-3.33606		1.03561	-3.30275	Kim et al.,(2007)	-3.87468	Grossman and Ku (1986)	Seymour Island		Maastrichtian	Latest Cretaceous	68.8		-64.29			Eselaevitrigonia	Petersen et al., (2016) NatureComms
E725C					0.780611	0.009	4					-1.24906	1.37401		Defliese et al., 2015		5.42125	1.1052	32.0494	-3.06627		1.03523	-3.06804	Kim et al.,(2007)	-3.65914	Grossman and Ku (1986)	Seymour Island		Maastrichtian	Latest Cretaceous	68.8		-64.29			Eselaevitrigonia	Petersen et al., (2016) NatureComms
E757-1					0.754488	0.009	4					6.15199	2.11492		Defliese et al., 2015		0.33275	0.947682	31.887	-1.48925		1.03342	-1.48649	Kim et al.,(2007)	-2.11135	Grossman and Ku (1986)	Seymour Island		Maastrichtian	Latest Cretaceous	66.971		-64.29			Eselaevitrigonia	Petersen et al., (2016) NatureComms
L1161A2-B					0.756167	0.011	3					5.59241	0.644149		Defliese et al., 2015		0.434667	0.621335	31.5505	-1.93286		1.03356	-1.94032	Kim et al.,(2007)	-2.56664	Grossman and Ku (1986)	Seymour Island		Maastrichtian	Latest Cretaceous	66.08		-64.29			Lahillia	Petersen et al., (2016) NatureComms
L1161A2-U					0.748288	0.0139717	5					8.27794	4.0821		Defliese et al., 2015		3.0366	0.998426	31.9393	-0.996705		1.03292	-0.952858	Kim et al.,(2007)	-1.57076	Grossman and Ku (1986)	Seymour Island		Maastrichtian	Latest Cretaceous	66.08		-64.29			Lahillia	Petersen et al., (2016) NatureComms
L1474A-B					0.776924	0.011	3					-0.208332	2.50844		Defliese et al., 2015		-0.197333	0.595683	31.5241	-3.3292		1.03497	-3.32555	Kim et al.,(2007)	-3.92886	Grossman and Ku (1986)	Seymour Island		Maastrichtian	Latest Cretaceous	66.244		-64.29			Lahillia	Petersen et al., (2016) NatureComms
L1474A-U					0.746928	0.011	3					8.39863	2.68338		Defliese et al., 2015		3.014	1.04332	31.9856	-0.883212		1.0329	-0.880844	Kim et al.,(2007)	-1.49806	Grossman and Ku (1986)	Seymour Island		Maastrichtian	Latest Cretaceous	66.244		-64.29			Lahillia	Petersen et al., (2016) NatureComms
L1480F-B					0.771016	0.0147285	5					1.70366	3.9114		Defliese et al., 2015		-0.9214	0.696946	31.6285	-2.81567		1.03449	-2.77035	Kim et al.,(2007)	-3.38705	Grossman and Ku (1986)	Seymour Island		Maastrichtian	Latest Cretaceous	66.497		-64.29			Lahillia	Petersen et al., (2016) NatureComms
L1480F-U					0.743235	0.011	3					9.48437	2.08711		Defliese et al., 2015		2.93467	1.55669	32.5148	-0.122323		1.03264	-0.12457	Kim et al.,(2007)	-0.734519	Grossman and Ku (1986)	Seymour Island		Maastrichtian	Latest Cretaceous	66.497		-64.29			Lahillia	Petersen et al., (2016) NatureComms
L1529C-B					0.733114	0.011	3					12.6332	2.51469		Defliese et al., 2015		-1.62567	0.502372	31.4279	-0.480424		1.03192	-0.480645	Kim et al.,(2007)	-1.0633	Grossman and Ku (1986)	Seymour Island		Maastrichtian	Latest Cretaceous	66.043		-64.29			Lahillia	Petersen et al., (2016) NatureComms
L1529C-U					0.739056	0.011	3					10.7324	1.18601		Defliese et al., 2015		2.65233	0.689314	31.6206	-0.705483		1.03236	-0.712602	Kim et al.,(2007)	-1.31433	Grossman and Ku (1986)	Seymour Island		Maastrichtian	Latest Cretaceous	66.043		-64.29			Lahillia	Petersen et al., (2016) NatureComms
L1609-B					0.745264	0.011	3					8.82745	0.575924		Defliese et al., 2015		-1.097	1.1347	32.0798	-0.684848		1.0328	-0.693128	Kim et al.,(2007)	-1.30786	Grossman and Ku (1986)	Seymour Island		Maastrichtian	Latest Cretaceous	67.346		-64.29			Lahillia	Petersen et al., (2016) NatureComms
L1609-U					0.73459	0.0162489	5					12.6789	5.35757		Defliese et al., 2015		2.623	0.981688	31.922	-0.064611		1.03191	0.00820824	Kim et al.,(2007)	-0.57344	Grossman and Ku (1986)	Seymour Island		Maastrichtian	Latest Cretaceous	67.346		-64.29			Lahillia	Petersen et al., (2016) NatureComms
L477D-B					0.75654	0.011	3					5.55341	2.61906		Defliese et al., 2015		-2.47367	0.678091	31.609	-1.89549		1.03357	-1.89266	Kim et al.,(2007)	-2.51886	Grossman and Ku (1986)	Seymour Island		Maastrichtian	Latest Cretaceous	66.048		-64.29			Lahillia	Petersen et al., (2016) NatureComms
L477D-U					0.763037	0.011	3					3.62871	1.47652		Defliese et al., 2015		1.84967	1.07859	32.0219	-1.93442		1.03403	-1.93856	Kim et al.,(2007)	-2.56185	Grossman and Ku (1986)	Seymour Island		Maastrichtian	Latest Cretaceous	66.048		-64.29			Lahillia	Petersen et al., (2016) NatureComms
L757B-B					0.742972	0.011	3					9.6019	2.78913		Defliese et al., 2015		1.409	1.45664	32.4117	-0.201171		1.03262	-0.198155	Kim et al.,(2007)	-0.807483	Grossman and Ku (1986)	Seymour Island		Maastrichtian	Latest Cretaceous	66.971		-64.29			Lahillia	Petersen et al., (2016) NatureComms
L757B-U					0.726886	0.0126901	4					14.7915	3.91916		Defliese et al., 2015		2.7835	1.5922	32.5514	1.05307		1.03144	1.07747	Kim et al.,(2007)	0.523843	Grossman and Ku (1986)	Seymour Island		Maastrichtian	Latest Cretaceous	66.971		-64.29			Lahillia	Petersen et al., (2016) NatureComms
L776A-B					0.752405	0.010345	4					6.84366	3.08802		Defliese et al., 2015		-1.534	0.523455	31.4496	-1.76588		1.03326	-1.75183	Kim et al.,(2007)	-2.37621	Grossman and Ku (1986)	Seymour Island		Maastrichtian	Latest Cretaceous	67.959		-64.29			Lahillia	Petersen et al., (2016) NatureComms
L776A-U					0.730879	0.009	4					13.3526	2.27699		Defliese et al., 2015		2.2165	1.05085	31.9933	0.222848		1.03176	0.224408	Kim et al.,(2007)	-0.34906	Grossman and Ku (1986)	Seymour Island		Maastrichtian	Latest Cretaceous	67.959		-64.29			Lahillia	Petersen et al., (2016) NatureComms
N1614B-B					0.760639	0.011	3					4.30208	0.944802		Defliese et al., 2015		0.892	0.890044	31.8275	-1.96369		1.03386	-1.97007	Kim et al.,(2007)	-2.59524	Grossman and Ku (1986)	Seymour Island		Maastrichtian	Latest Cretaceous	68.963		-64.29			Nordenskjoldia	Petersen et al., (2016) NatureComms
N1614B-U					0.756148	0.011	3					5.61664	1.46589		Defliese et al., 2015		0.541333	0.610433	31.5393	-1.94095		1.03355	-1.94562	Kim et al.,(2007)	-2.57195	Grossman and Ku (1986)	Seymour Island		Maastrichtian	Latest Cretaceous	68.963		-64.29			Nordenskjoldia	Petersen et al., (2016) NatureComms
N1620A-B2					0.749306	0.0156361	5					8.11121	4.98577		Defliese et al., 2015		1.0928	0.578817	31.5067	-1.47469		1.03296	-1.40925	Kim et al.,(2007)	-2.02878	Grossman and Ku (1986)	Seymour Island		Maastrichtian	Latest Cretaceous	68.8		-64.29			Nordenskjoldia	Petersen et al., (2016) NatureComms
N1620A-U2					0.746775	0.011	3					8.38739	1.33462		Defliese et al., 2015		0.369667	0.485378	31.4104	-1.43422		1.0329	-1.44024	Kim et al.,(2007)	-2.05859	Grossman and Ku (1986)	Seymour Island		Maastrichtian	Latest Cretaceous	68.8		-64.29			Nordenskjoldia	Petersen et al., (2016) NatureComms
N1626A-B					0.751816	0.008	5					6.93	1.74285		Defliese et al., 2015		0.15	0.804494	31.7394	-1.45299		1.03324	-1.45178	Kim et al.,(2007)	-2.07528	Grossman and Ku (1986)	Seymour Island		Maastrichtian	Latest Cretaceous	68.943		-64.29			Nordenskjoldia	Petersen et al., (2016) NatureComms
N1626B-U					0.744259	0.011	3					9.21666	2.89203		Defliese et al., 2015		-0.341667	0.534117	31.4606	-1.2092		1.03271	-1.20532	Kim et al.,(2007)	-1.81877	Grossman and Ku (1986)	Seymour Island		Maastrichtian	Latest Cretaceous	68.943		-64.29			Nordenskjoldia	Petersen et al., (2016) NatureComms
4aw	0.647					0.005	3					24.8			Ghosh et al. (2006)		-0.04	-2.41	28.4255	-1.38		1.02929	-0.840693	Kim et al.,(2007)	-1.17226	Grossman and Ku (1986)	Hatchetigbee, Alabama		Ypresian	Eocene	50-55		28.97	31.87	26.26		Keating-Bitonti et al 2011 Geology
4as	0.65					0.014	3					24.2			Ghosh et al. (2006)		-0.14	-4.04	26.7452	-3.15		1.02942	-2.59402	Kim et al.,(2007)	-2.94051	Grossman and Ku (1986)	Hatchetigbee, Alabama		Ypresian	Eocene	50-55		28.97	31.87	26.26		Keating-Bitonti et al 2011 Geology
4ab	0.638					0.013	4					26.3			Ghosh et al. (2006)		-0.06	-3.92	26.8689	-2.3		1.02898	-2.05311	Kim et al.,(2007)	-2.33664	Grossman and Ku (1986)	Hatchetigbee, Alabama		Ypresian	Eocene	50-55		28.97	31.87	26.26		Keating-Bitonti et al 2011 Geology
2aw	0.65					0.015	3					24			Ghosh et al. (2006)		-1.24	-2.49	28.3431	-1.5		1.02946	-1.08222	Kim et al.,(2007)	-1.43659	Grossman and Ku (1986)	Hatchetigbee, Alabama		Ypresian	Eocene	50-55		28.97	31.87	26.26		Keating-Bitonti et al 2011 Geology
2as	0.665					0.01	3					20.8			Ghosh et al. (2006)		-1.61	-4.16	26.6215	-3.92		1.03013	-3.40758	Kim et al.,(2007)	-3.84392	Grossman and Ku (1986)	Hatchetigbee, Alabama		Ypresian	Eocene	50-55		28.97	31.87	26.26		Keating-Bitonti et al 2011 Geology
2b	0.634					0.006	4					27.8			Ghosh et al. (2006)		-1.59	-2.94	27.8792	-1.08		1.02868	-0.773957	Kim et al.,(2007)	-1.01101	Grossman and Ku (1986)	Hatchetigbee, Alabama		Ypresian	Eocene	50-55		28.97	31.87	26.26		Keating-Bitonti et al 2011 Geology
1bw	0.631					0.014	4					28.3			Ghosh et al. (2006)		-0.12	-2.64	28.1884	-0.66		1.02857	-0.374807	Kim et al.,(2007)	-0.595806	Grossman and Ku (1986)	Hatchetigbee, Alabama		Ypresian	Eocene	50-55		28.97	31.87	26.26		Keating-Bitonti et al 2011 Geology
1bs	0.641					0.008	3					26.1			Ghosh et al. (2006)		-0.67	-3.35	27.4565	-1.89		1.02902	-1.5219	Kim et al.,(2007)	-1.81272	Grossman and Ku (1986)	Hatchetigbee, Alabama		Ypresian	Eocene	50-55		28.97	31.87	26.26		Keating-Bitonti et al 2011 Geology
1cw	0.618						1					31.4			Ghosh et al. (2006)		-0.03	-2.73	28.0956	-0.03		1.02795	0.138639	Kim et al.,(2007)	0.0284793	Grossman and Ku (1986)	Hatchetigbee, Alabama		Ypresian	Eocene	50-55		28.97	31.87	26.26		Keating-Bitonti et al 2011 Geology
1cs	0.62					0.005	2					31			Ghosh et al. (2006)		-1.17	-4.18	26.6008	-1.58		1.02803	-1.39262	Kim et al.,(2007)	-1.51369	Grossman and Ku (1986)	Hatchetigbee, Alabama		Ypresian	Eocene	50-55		28.97	31.87	26.26		Keating-Bitonti et al 2011 Geology
R. diluvianum WM												29.2			Kele et al., (2015)			-2.14731	28.6963	1.08		1.02759	1.08	Kim and O'Neil (1997)	0.83296	Epstein et al., (1953)	Ivö Klack, Sweden		Campanian	Late Cretaceous	78		46.3	49.36	43.5	R. diluvianum	De Winter et al., 2021
R. diluvianum MA												24.6			Kele et al., (2015)			-1.74638	29.1096	0.56		1.02853	0.56	Kim and O'Neil (1997)	0.301568	Epstein et al., (1953)	Ivö Klack, Sweden		Campanian	Late Cretaceous	78		46.3	49.36	43.5	R. diluvianum	De Winter et al., 2021
R. diluvianum CM												19.6			Kele et al., (2015)			-1.27271	29.5979	0		1.0296	0	Kim and O'Neil (1997)	-0.29934	Epstein et al., (1953)	Ivö Klack, Sweden		Campanian	Late Cretaceous	78		46.3	49.36	43.5	R. diluvianum	De Winter et al., 2021
A. incurva WM												25.7			Kele et al., (2015)			-2.88653	27.9342	-0.36		1.0283	-0.36	Kim and O'Neil (1997)	-0.611084	Epstein et al., (1953)	Asen, Sweden		Campanian	Late Cretaceous	78		46.4	49.4	43.6	A. incurva	De Winter et al., 2021
A. incurva MA												16.4			Kele et al., (2015)			-1.05242	29.825	-0.46		1.0303	-0.46	Kim and O'Neil (1997)	-0.8062	Epstein et al., (1953)	Asen, Sweden		Campanian	Late Cretaceous	78		46.4	49.4	43.6	A. incurva	De Winter et al., 2021
A. incurva CM												12.7			Kele et al., (2015)			-0.677035	30.212	-0.89		1.03113	-0.89	Kim and O'Neil (1997)	-1.31707	Epstein et al., (1953)	Asen, Sweden		Campanian	Late Cretaceous	78		46.4	49.4	43.6	A. incurva	De Winter et al., 2021
B. suecicus WM												24.8			Kele et al., (2015)			-2.89435	27.9262	-0.55		1.02849	-0.55	Kim and O'Neil (1997)	-0.804817	Epstein et al., (1953)	Maltesholm, Sweden		Campanian	Late Cretaceous	78		46.14	49.13	43.3	B. suecicus	De Winter et al., 2021
B. suecicus MA												19.3			Kele et al., (2015)			-2.38818	28.448	-1.18		1.02966	-1.18	Kim and O'Neil (1997)	-1.48158	Epstein et al., (1953)	Maltesholm, Sweden		Campanian	Late Cretaceous	78		46.14	49.13	43.3	B. suecicus	De Winter et al., 2021
B. suecicus CM												13.7			Kele et al., (2015)			-1.81674	29.0371	-1.81		1.0309	-1.81	Kim and O'Neil (1997)	-2.21199	Epstein et al., (1953)	Maltesholm, Sweden		Campanian	Late Cretaceous	78		46.14	49.13	43.3	B. suecicus	De Winter et al., 2021
PRW 228					0.59575		12					24.3704	7.66598		Anderson et al. 2021			-3.06667	27.7486			1.02938	-1.58491	Kim et al.,(2007)	-1.92792	Grossman and Ku (1986)	Christian Malford, UK		Callovian	Mid Jurassic	165		34.4	39.8	29.6	ammonite	Vickers et al., 2021
PRW 228					0.598933		15					23.3733	6.96788		Anderson et al. 2021			-1.78733	29.0674			1.02959	-0.50569	Kim et al.,(2007)	-0.878333	Grossman and Ku (1986)	Christian Malford, UK		Callovian	Mid Jurassic	165		34.4	39.8	29.6	Cylindroteuthis phrag	Vickers et al., 2021
PRW 234					0.587455		11					26.6277	3.9292		Anderson et al. 2021			-3.41909	27.3853			1.02891	-1.4861	Kim et al.,(2007)	-1.76022	Grossman and Ku (1986)	Christian Malford, UK		Callovian	Mid Jurassic	165		34.4	39.8	29.6	Cylindroteuthis phrag	Vickers et al., 2021
PRW 393					0.592643		14					25.1026	5.18668		Anderson et al. 2021			-1.95071	28.899			1.02923	-0.31983	Kim et al.,(2007)	-0.643253	Grossman and Ku (1986)	Christian Malford, UK		Callovian	Mid Jurassic	165		34.4	39.8	29.6	ammonite	Vickers et al., 2021
PRW 393					0.607636		11					19.8757	3.5106		Anderson et al. 2021			-1.09273	29.7835			1.03033	-0.529802	Kim et al.,(2007)	-0.989613	Grossman and Ku (1986)	Christian Malford, UK		Callovian	Mid Jurassic	165		34.4	39.8	29.6	Cylindroteuthis phrag	Vickers et al., 2021
PRW 436					0.587417		12					26.6537	3.74182		Anderson et al. 2021			-3.42833	27.3757			1.02891	-1.49019	Kim et al.,(2007)	-1.76347	Grossman and Ku (1986)	Christian Malford, UK		Callovian	Mid Jurassic	165		34.4	39.8	29.6	Cylindroteuthis z phrag	Vickers et al., 2021
PRW 529					0.608667		15					19.9999	5.80365		Anderson et al. 2021			-1.02667	29.8516			1.0303	-0.437865	Kim et al.,(2007)	-0.894936	Grossman and Ku (1986)	Christian Malford, UK		Callovian	Mid Jurassic	165		34.4	39.8	29.6	bivalve	Vickers et al., 2021
PRW 529					0.606727		11					20.571	6.87742		Anderson et al. 2021			-1.52909	29.3337			1.03018	-0.822095	Kim et al.,(2007)	-1.26577	Grossman and Ku (1986)	Christian Malford, UK		Callovian	Mid Jurassic	165		34.4	39.8	29.6	Belemnites phrag	Vickers et al., 2021
PRW 720					0.607		14					20.3849	5.4517		Anderson et al. 2021			-2.06286	28.7834			1.03022	-1.39478	Kim et al.,(2007)	-1.84242	Grossman and Ku (1986)	Christian Malford, UK		Callovian	Mid Jurassic	165		34.4	39.8	29.6	ammonite	Vickers et al., 2021
PRW 720					0.5996		10					22.5242	4.0975		Anderson et al. 2021			-2.431	28.4039			1.02977	-1.32312	Kim et al.,(2007)	-1.71764	Grossman and Ku (1986)	Christian Malford, UK		Callovian	Mid Jurassic	165		34.4	39.8	29.6	Cylindroteuthis phrag	Vickers et al., 2021
PRW 720					0.5895		16					26.024	3.87111		Anderson et al. 2021			-0.414375	30.4828			1.02904	1.40389	Kim et al.,(2007)	1.1054	Grossman and Ku (1986)	Christian Malford, UK		Callovian	Mid Jurassic	165		34.4	39.8	29.6	shell indet	Vickers et al., 2021
PRW 228					0.601938		16					22.1694	5.64169		Anderson et al. 2021			-0.600625	30.2908			1.03078	-0.478034	Coplen (2007)			Christian Malford, UK		Callovian	Mid Jurassic	165		34.4	39.8	29.6	Cylindroteuthis rost	Vickers et al., 2021
PRW 234					0.579538		13					29.5476	4.80478		Anderson et al. 2021			-0.706923	30.1812			1.0293	0.851995	Coplen (2007)			Christian Malford, UK		Callovian	Mid Jurassic	165		34.4	39.8	29.6	Cylindroteuthis rost	Vickers et al., 2021
PRW 393					0.584833		6					27.5235	5.84508		Anderson et al. 2021			-0.55	30.343			1.0297	0.621869	Coplen (2007)			Christian Malford, UK		Callovian	Mid Jurassic	165		34.4	39.8	29.6	Cylindroteuthis rostum XS	Vickers et al., 2021
PRW 436					0.5962		10					23.6317	3.72974		Anderson et al. 2021			-0.88	30.0028			1.03048	-0.467323	Coplen (2007)			Christian Malford, UK		Callovian	Mid Jurassic	165		34.4	39.8	29.6	Cylindroteuthis z rost	Vickers et al., 2021
PRW 720					0.580846		13					29.2711	6.16465		Anderson et al. 2021			-0.92	29.9616			1.02936	0.586004	Coplen (2007)			Christian Malford, UK		Callovian	Mid Jurassic	165		34.4	39.8	29.6	Cylindroteuthis rost	Vickers et al., 2021
Pol 13					0.6283		2					13.9689	3.96506		Anderson et al. 2021			-3.23	27.5802			1.03162	-3.91944	Kim et al.,(2007)	-4.4879	Grossman and Ku (1986)	Polvinnaya River, Russia		Toarcian	Early Jurassic			85.35			Dacryomya jacutica	This study
Pol 18					0.6247		3					15.0648	3.30648		Anderson et al. 2021			-2.7	28.1266			1.03138	-3.1538	Kim et al.,(2007)	-3.70539	Grossman and Ku (1986)	Polvinnaya River, Russia		Toarcian	Early Jurassic			85.35			Dacryomya jacutica	This study
Pol 21					0.618		5					17.1382	2.75273		Anderson et al. 2021			-2.63	28.1987			1.03092	-2.642	Kim et al.,(2007)	-3.15765	Grossman and Ku (1986)	Polvinnaya River, Russia		Toarcian	Early Jurassic			85.35			Dacryomya jacutica	This study
Pol 2					0.6279		2					14.0901	3.90947		Anderson et al. 2021			-2.21	28.6317			1.0316	-2.87396	Kim et al.,(2007)	-3.43998	Grossman and Ku (1986)	Polvinnaya River, Russia		Toarcian	Early Jurassic			85.35			Dacryomya jacutica	This study
Pol 33					0.627		2					14.3632	3.98142		Anderson et al. 2021			-2.76	28.0647			1.03154	-3.36465	Kim et al.,(2007)	-3.92705	Grossman and Ku (1986)	Polvinnaya River, Russia		Toarcian	Early Jurassic			85.35			Dacryomya jacutica	This study
Pol 35a					0.6151		3					18.0496	3.41028		Anderson et al. 2021			-2.12	28.7245			1.03072	-1.93962	Kim et al.,(2007)	-2.43764	Grossman and Ku (1986)	Polvinnaya River, Russia		Toarcian	Early Jurassic			85.35			Dacryomya jacutica	This study
Pol 49					0.6457		1					8.84297	5.21891		Anderson et al. 2021			-2.36	28.4771			1.03279	-4.17794	Kim et al.,(2007)	-4.79899	Grossman and Ku (1986)	Polvinnaya River, Russia		Toarcian	Early Jurassic			85.35			Dacryomya jacutica	This study
Pol 5b					0.6209		5					16.2353	2.66515		Anderson et al. 2021			-2.74	28.0853			1.03112	-2.94363	Kim et al.,(2007)	-3.4757	Grossman and Ku (1986)	Polvinnaya River, Russia		Toarcian	Early Jurassic			85.35			Dacryomya jacutica	This study
Ard-05 am					0.592		5					25.6299	2.89912		Anderson et al. 2021			-0.84	30.044			1.02912	0.898575	Kim et al.,(2007)	0.588955	Grossman and Ku (1986)	Warcq, France		Pliensbachian	Early Jurassic			41.67			Beaniceras sp.	This study
Ard-04 biv					0.5851		4					28.0114	3.31829		Anderson et al. 2021			-2.77	28.0544			1.02863	-0.561901	Kim et al.,(2007)	-0.792295	Grossman and Ku (1986)	Warcq, France		Pliensbachian	Early Jurassic			41.67			Undetermined bivalve	This study
Ard-01 biv					0.5883		3					26.8999	3.73076		Anderson et al. 2021			-2.14	28.7039			1.02886	-0.150445	Kim et al.,(2007)	-0.418414	Grossman and Ku (1986)	Warcq, France		Pliensbachian	Early Jurassic			41.67			Grammatondon sp.	This study
Ard-03 biv					0.5955		2					24.4432	4.38133		Anderson et al. 2021			-2.54	28.2915			1.02936	-1.04277	Kim et al.,(2007)	-1.38447	Grossman and Ku (1986)	Warcq, France		Pliensbachian	Early Jurassic			41.67			Limea sp.	This study
Ard-06 am					0.5891		4					26.6239	2.54922		Anderson et al. 2021			-2.67685	28.1504			1.02892	-0.743176	Kim et al.,(2007)	-1.01885	Grossman and Ku (1986)	Warcq, France		Pliensbachian	Early Jurassic			41.67			Aegoceras ?	This study
Ard-07 biv					0.5911		3					25.9373	2.87387		Anderson et al. 2021			-2.7868	28.0371			1.02906	-0.990144	Kim et al.,(2007)	-1.28701	Grossman and Ku (1986)	Warcq, France		Pliensbachian	Early Jurassic			41.67			undetermined Mytiloidea	This study

## Sheet: TEX 86
Reference	Locality	Latitude	Longitude	TEX86	T°C TEX86H	T°C TEX86L	Age	Time Slice	Absolute age Ma	Paleolatitude	Primary source
Frieling et al., 2014 Geology	West Siberian Sea			0.63	24.9	20.7	Ypresian	Eocene	51.81	51.8
Frieling et al., 2014 Geology	West Siberian Sea			0.63	25	20.7	Ypresian	Eocene	51.95	51.8
Frieling et al., 2014 Geology	West Siberian Sea			0.67	26.8	23	Ypresian	Eocene	52.06	51.8
Frieling et al., 2014 Geology	West Siberian Sea			0.65	25.6	21.6	Ypresian	Eocene	52.19	51.8
Frieling et al., 2014 Geology	West Siberian Sea			0.64	25.3	20.5	Ypresian	Eocene	52.26	51.8
Frieling et al., 2014 Geology	West Siberian Sea			0.63	24.9	20.3	Ypresian	Eocene	52.4	51.8
Frieling et al., 2014 Geology	West Siberian Sea			0.63	24.6	20.5	Ypresian	Eocene	52.53	51.8
Frieling et al., 2014 Geology	West Siberian Sea			0.62	24.4	19	Ypresian	Eocene	52.6	51.8
Frieling et al., 2014 Geology	West Siberian Sea			0.64	25.3	19.9	Ypresian	Eocene	52.8	51.8
Frieling et al., 2014 Geology	West Siberian Sea			0.64	25.3	20	Ypresian	Eocene	52.99	51.8
Frieling et al., 2014 Geology	West Siberian Sea			0.58	22.4	17.5	Ypresian	Eocene	53.12	51.8
Frieling et al., 2014 Geology	West Siberian Sea			0.6	23.2	17.9	Ypresian	Eocene	53.32	51.8
Frieling et al., 2014 Geology	West Siberian Sea			0.57	22.1	16.8	Ypresian	Eocene	53.52	51.8
Frieling et al., 2014 Geology	West Siberian Sea			0.53	19.9	13.9	Ypresian	Eocene	53.59	51.8
Frieling et al., 2014 Geology	West Siberian Sea			0.55	21.1	15	Ypresian	Eocene	53.61	51.8
Frieling et al., 2014 Geology	West Siberian Sea			0.58	22.2	16.6	Ypresian	Eocene	53.83	51.8
Frieling et al., 2014 Geology	West Siberian Sea			0.59	22.7	17.2	Ypresian	Eocene	53.95	51.8
Frieling et al., 2014 Geology	West Siberian Sea			0.59	23	16.8	Ypresian	Eocene	54.09	51.8
Frieling et al., 2014 Geology	West Siberian Sea			0.59	23	16.7	Ypresian	Eocene	54.11	51.8
Frieling et al., 2014 Geology	West Siberian Sea			0.52	19	12.2	Ypresian	Eocene	54.16	51.8
Frieling et al., 2014 Geology	West Siberian Sea			0.55	20.7	15	Ypresian	Eocene	54.38	51.8
Frieling et al., 2014 Geology	West Siberian Sea			0.53	19.7	13.2	Ypresian	Eocene	54.57	51.8
Frieling et al., 2014 Geology	West Siberian Sea			0.57	21.8	17.2	Ypresian	Eocene	54.89	51.8
Frieling et al., 2014 Geology	West Siberian Sea			0.61	23.8	19.9	Ypresian	Eocene	54.89	51.8
Frieling et al., 2014 Geology	West Siberian Sea			0.57	21.7	16.4	Ypresian	Eocene	55.17	50.2
Frieling et al., 2014 Geology	West Siberian Sea			0.55	20.9	15.4	Ypresian	Eocene	55.25	50.2
Frieling et al., 2014 Geology	West Siberian Sea			0.58	22.4	16.5	Ypresian	Eocene	55.31	50.2
Frieling et al., 2014 Geology	West Siberian Sea			0.62	24.3	19.2	Ypresian	Eocene	55.36	50.2
Frieling et al., 2014 Geology	West Siberian Sea			0.69	27.4	22.6	Ypresian	Eocene	55.45	50.2
Frieling et al., 2014 Geology	West Siberian Sea			0.7	27.8	22.7	Ypresian	Eocene	55.47	50.2
Frieling et al., 2014 Geology	West Siberian Sea			0.67	26.5	21.9	Ypresian	Eocene	55.53	50.2
Frieling et al., 2014 Geology	West Siberian Sea			0.56	21.5	15.9	Thanetian	Paleocene	57.09	50.2
Frieling et al., 2014 Geology	West Siberian Sea			0.49	17.6	7.8	Thanetian	Paleocene	57.13	50.2
Frieling et al., 2014 Geology	West Siberian Sea			0.51	18.4	8.5	Thanetian	Paleocene	57.26	50.2
Frieling et al., 2014 Geology	West Siberian Sea			0.48	16.8	5.5	Thanetian	Paleocene	57.57	50.2
Frieling et al., 2014 Geology	West Siberian Sea			0.49	17.5	7.5	Thanetian	Paleocene	58.18	50.2
Frieling et al., 2014 Geology	West Siberian Sea			0.49	17.6	7.9	Thanetian	Paleocene	59.11	50.2
Frieling et al., 2014 Geology	West Siberian Sea			0.5	18.1	9.7	Selandian	Paleocene	59.39	50.2
Frieling et al., 2014 Geology	West Siberian Sea			0.51	18.7	10.5	Selandian	Paleocene	59.98	50.2
Robinson et al 2017	Hole 547	33.7807	-9.34967	0.78	31.4	33.3	Pliensbachian	Early Jurassic		28.1
Robinson et al 2017	Hole 547	33.7807	-9.34967	0.79	31.6	33.7	Pliensbachian	Early Jurassic		28.1
Robinson et al 2017	Hole 547	33.7807	-9.34967	0.83	33	35.7	Pliensbachian	Early Jurassic		28.1
Robinson et al 2017	Hole 547	33.7807	-9.34967	0.88	34.9	38.9	Sinemurian	Early Jurassic		28.1
Robinson et al 2017	Hole 547	33.7807	-9.34967	0.79	31.6	33.7	Sinemurian	Early Jurassic		28.1
Robinson et al 2017	Hole 547	33.7807	-9.34967	0.83	33.2	36.1	Sinemurian	Early Jurassic		28.1
Robinson et al 2017	Hole 547	33.7807	-9.34967	0.88	34.7	38.5	Sinemurian	Early Jurassic		28.1
Robinson et al 2017	Hole 547	33.7807	-9.34967	0.83	33	35.7	Sinemurian	Early Jurassic		28.1
Robinson et al 2017	Hole 547	33.7807	-9.34967	0.85	33.6	36.7	Sinemurian	Early Jurassic		28.1
O'Connor et al (2019)	DSDP 327			0.66	26.35	27.77	Campanian	Latest Cretaceous	72.87	-58
O'Connor et al (2019)	DSDP 327			0.65	19.59	19.84	Campanian	Latest Cretaceous	72.91	-58
O'Connor et al (2019)	DSDP 327			0.56	30.3	33.3	Campanian	Latest Cretaceous	72.99	-58
O'Connor et al (2019)	DSDP 327			0.67	23.12	23.76	Campanian	Latest Cretaceous	73.03	-58
O'Connor et al (2019)	DSDP 327			0.5	25.74	26.98	Campanian	Latest Cretaceous	73.45	-58
O'Connor et al (2019)	DSDP 327			0.53	27.81	29.73	Campanian	Latest Cretaceous	73.47	-58
O'Connor et al (2019)	DSDP 327			0.59	26.8	28.37	Campanian	Latest Cretaceous	73.59	-58
O'Connor et al (2019)	DSDP 327			0.7	21.17	21.53	Campanian	Latest Cretaceous	74.13	-58
O'Connor et al (2019)	DSDP 327			0.67	19.52	19.77	Campanian	Latest Cretaceous	74.16	-58
O'Connor et al (2019)	DSDP 327			0.53	26.6	28.1	Campanian	Latest Cretaceous	74.23	-58
O'Connor et al (2019)	DSDP 327			0.78	31.31	34.85	Campanian	Latest Cretaceous	74.26	-58
O'Connor et al (2019)	DSDP 327			0.47	16.21	16.5	Campanian	Latest Cretaceous	74.3	-58
O'Connor et al (2019)	DSDP 327			0.59	22.75	23.33	Campanian	Latest Cretaceous	74.35	-58
O'Connor et al (2019)	DSDP 327			0.69	27.57	29.41	Campanian	Latest Cretaceous	74.37	-58
O'Connor et al (2019)	DSDP 327			0.76	30.3	33.3	Campanian	Latest Cretaceous	75.36	-57.5
O'Connor et al (2019)	DSDP 327			0.66	26.33	27.74	Campanian	Latest Cretaceous	75.56	-57.5
O'Connor et al (2019)	DSDP 511			0.55	21	21.35	Campanian	Latest Cretaceous	76.85	-57.6
O'Connor et al (2019)	DSDP 511			0.53	19.73	19.99	Campanian	Latest Cretaceous	77.08	-57.6
O'Connor et al (2019)	DSDP 511			0.56	21.42	21.81	Campanian	Latest Cretaceous	77.12	-57.6
O'Connor et al (2019)	DSDP 511			0.56	21.61	22.03	Campanian	Latest Cretaceous	77.12	-57.6
O'Connor et al (2019)	DSDP 511			0.66	26.43	27.88	Campanian	Latest Cretaceous	77.15	-57.6
O'Connor et al (2019)	DSDP 511			0.58	22.43	22.96	Campanian	Latest Cretaceous	78.01	-57.6
O'Connor et al (2019)	DSDP 511			0.69	27.59	29.43	Campanian	Latest Cretaceous	78.77	-57.6
O'Connor et al (2019)	DSDP 511			0.74	29.62	32.3	Campanian	Latest Cretaceous	78.77	-57.6
O'Connor et al (2019)	DSDP 511			0.71	28.31	30.43	Campanian	Latest Cretaceous	78.94	-57.6
O'Connor et al (2019)	DSDP 511			0.69	27.37	29.12	Campanian	Latest Cretaceous	79.34	-57.6
O'Connor et al (2019)	DSDP 511			0.64	25.27	26.38	Campanian	Latest Cretaceous	79.74	-57.6
O'Connor et al (2019)	DSDP 511			0.62	24.53	25.45	Campanian	Latest Cretaceous	81.03	-57.6
O'Connor et al (2019)	DSDP 511			0.73	29.37	31.93	Campanian	Latest Cretaceous	81.07	-57.6
O'Connor et al (2019)	DSDP 511			0.68	27.28	29.01	Campanian	Latest Cretaceous	81.13	-57.6
O'Connor et al (2019)	DSDP 511			0.72	28.86	31.21	Campanian	Latest Cretaceous	81.3	-57.6
O'Connor et al (2019)	DSDP 511			0.75	29.94	32.77	Campanian	Latest Cretaceous	81.44	-57.6
O'Connor et al (2019)	DSDP 511			0.69	27.48	29.28	Campanian	Latest Cretaceous	81.5	-57.6
O'Connor et al (2019)	DSDP 511			0.71	28.31	30.43	Campanian	Latest Cretaceous	81.51	-57.6
O'Connor et al (2019)	DSDP 511			0.76	30.57	33.71	Campanian	Latest Cretaceous	81.56	-57.6
O'Connor et al (2019)	DSDP 511			0.7	27.99	29.98	Campanian	Latest Cretaceous	81.7	-57.6
O'Connor et al (2019)	DSDP 511			0.74	29.78	32.53	Campanian	Latest Cretaceous	81.71	-57.6
O'Connor et al (2019)	DSDP 511			0.75	30.04	32.92	Campanian	Latest Cretaceous	81.85	-57.6
O'Connor et al (2019)	DSDP 511			0.74	29.7	32.42	Campanian	Latest Cretaceous	81.98	-57.6
O'Connor et al (2019)	DSDP 511			0.72	28.67	30.93	Campanian	Latest Cretaceous	82.11	-57.6
O'Connor et al (2019)	DSDP 511			0.68	27.24	28.95	Campanian	Latest Cretaceous	82.13	-57.6
O'Connor et al (2019)	DSDP 511			0.75	29.9	32.72	Campanian	Latest Cretaceous	82.16	-57.6
O'Connor et al (2019)	DSDP 511			0.74	29.52	32.15	Campanian	Latest Cretaceous	82.28	-57.6
O'Connor et al (2019)	DSDP 511			0.72	28.69	30.97	Campanian	Latest Cretaceous	82.34	-57.6
O'Connor et al (2019)	DSDP 511			0.67	26.68	28.2	Campanian	Latest Cretaceous	82.48	-57.6
O'Connor et al (2019)	DSDP 511			0.73	29.38	31.96	Campanian	Latest Cretaceous	82.5	-57.6
O'Connor et al (2019)	DSDP 511			0.73	29.07	31.5	Campanian	Latest Cretaceous	82.55	-57.6
O'Connor et al (2019)	DSDP 511			0.76	30.35	33.38	Campanian	Latest Cretaceous	82.68	-57.6
O'Connor et al (2019)	DSDP 511			0.57	21.99	22.45	Campanian	Latest Cretaceous	82.73	-57.6
O'Connor et al (2019)	DSDP 511			0.75	29.98	32.83	Campanian	Latest Cretaceous	82.8	-57.6
O'Connor et al (2019)	DSDP 511			0.72	28.73	31.02	Campanian	Latest Cretaceous	82.91	-57.6
O'Connor et al (2019)	DSDP 511			0.74	29.56	32.22	Campanian	Latest Cretaceous	82.96	-57.6
O'Connor et al (2019)	DSDP 511			0.72	28.98	31.38	Campanian	Latest Cretaceous	83.07	-57.6
O'Connor et al (2019)	DSDP 511			0.71	28.47	30.64	Campanian	Latest Cretaceous	83.14	-57.6
O'Connor et al (2019)	DSDP 511			0.72	28.89	31.25	Campanian	Latest Cretaceous	83.14	-57.6
O'Connor et al (2019)	DSDP 511			0.76	30.38	33.43	Campanian	Latest Cretaceous	83.2	-57.6
O'Connor et al (2019)	DSDP 511			0.74	29.52	32.15	Campanian	Latest Cretaceous	83.27	-57.6
O'Connor et al (2019)	DSDP 511			0.72	28.78	31.09	Santonian	early Late Cretaceous	83.72	-57.6
O'Connor et al (2019)	DSDP 511			0.76	30.45	33.54	Santonian	early Late Cretaceous	83.85	-57.6
O'Connor et al (2019)	DSDP 511			0.74	29.62	32.3	Santonian	early Late Cretaceous	83.93	-57.6
O'Connor et al (2019)	DSDP 511			0.95	37.12	44.8	Santonian	early Late Cretaceous	83.99	-57.6
O'Connor et al (2019)	DSDP 511			0.73	29.41	32	Santonian	early Late Cretaceous	84.07	-57.6
O'Connor et al (2019)	DSDP 511			0.75	30	32.86	Santonian	early Late Cretaceous	84.45	-57.6
O'Connor et al (2019)	DSDP 511			0.74	29.56	32.21	Santonian	early Late Cretaceous	84.57	-57.6
O'Connor et al (2019)	DSDP 511			0.69	27.71	29.59	Santonian	early Late Cretaceous	84.7	-57.6
O'Connor et al (2019)	DSDP 511			0.71	28.42	30.58	Santonian	early Late Cretaceous	84.71	-57.6
O'Connor et al (2019)	DSDP 511			0.72	28.81	31.13	Santonian	early Late Cretaceous	84.84	-57.6
O'Connor et al (2019)	DSDP 511			0.74	29.61	32.28	Santonian	early Late Cretaceous	84.9	-57.6
O'Connor et al (2019)	DSDP 511			0.78	31.35	34.91	Santonian	early Late Cretaceous	85.02	-56.6
O'Connor et al (2019)	DSDP 511			0.71	28.52	30.71	Santonian	early Late Cretaceous	85.26	-56.6
O'Connor et al (2019)	DSDP 511			0.78	31.31	34.85	Santonian	early Late Cretaceous	85.31	-56.6
O'Connor et al (2019)	DSDP 511			0.7	28.04	30.05	Santonian	early Late Cretaceous	85.41	-56.6
O'Connor et al (2019)	DSDP 511			0.76	30.56	33.69	Santonian	early Late Cretaceous	85.42	-56.6
O'Connor et al (2019)	DSDP 511			0.71	28.46	30.63	Santonian	early Late Cretaceous	85.45	-56.6
O'Connor et al (2019)	DSDP 511			0.71	28.58	30.81	Santonian	early Late Cretaceous	85.64	-56.6
O'Connor et al (2019)	DSDP 511			0.75	29.91	32.72	Santonian	early Late Cretaceous	86.11	-56.6
O'Connor et al (2019)	DSDP 511			0.69	27.48	29.29	Coniacian	early Late Cretaceous	86.65	-56.6
O'Connor et al (2019)	DSDP 511			0.64	25.48	26.64	Coniacian	early Late Cretaceous	86.92	-56.6
O'Connor et al (2019)	DSDP 511			0.6	23.22	23.88	Coniacian	early Late Cretaceous	87.51	-56.6
O'Connor et al (2019)	DSDP 511			0.77	30.98	34.34	Coniacian	early Late Cretaceous	87.62	-56.6
O'Connor et al (2019)	DSDP 511			0.78	31.21	34.7	Coniacian	early Late Cretaceous	88.09	-56.6
O'Connor et al (2019)	DSDP 511			0.6	23.4	24.09	Coniacian	early Late Cretaceous	88.1	-56.6
O'Connor et al (2019)	DSDP 511			0.77	30.95	34.29	Coniacian	early Late Cretaceous	88.11	-56.6
O'Connor et al (2019)	DSDP 511			0.8	31.88	35.73	Coniacian	early Late Cretaceous	88.54	-56.6
O'Connor et al (2019)	DSDP 511			0.58	22.34	22.85	Coniacian	early Late Cretaceous	88.68	-56.6
O'Connor et al (2019)	DSDP 511			0.79	31.51	35.15	Coniacian	early Late Cretaceous	88.8	-56.6
O'Connor et al (2019)	DSDP 511			0.79	31.56	35.23	Coniacian	early Late Cretaceous	89.49	-56.6
O'Connor et al (2019)	DSDP 511			0.8	32.06	36.02	Coniacian	early Late Cretaceous	89.57	-56.6
O'Connor et al (2019)	DSDP 511			0.72	28.85	31.19	Turonian	early Late Cretaceous	89.59	-56.6
O'Connor et al (2019)	DSDP 511			0.8	31.92	35.81	Turonian	early Late Cretaceous	89.86	-56.6
O'Connor et al (2019)	DSDP 511			0.82	32.66	36.99	Turonian	early Late Cretaceous	90.55	-56.6
O'Connor et al (2019)	DSDP 511			0.82	32.85	37.3	Turonian	early Late Cretaceous	90.55	-56.6
O'Connor et al (2019)	DSDP 511			0.58	22.41	22.94	Turonian	early Late Cretaceous	95.58	-54.7
O'Connor et al (2019)	ODP 1135			0.74	29.68	32.4	Turonian	early Late Cretaceous	86.29	-61.7
O'Connor et al (2019)	ODP 1135			0.75	30.21	33.17	Turonian	early Late Cretaceous	87.02	-61.7
O'Connor et al (2019)	ODP 1135			0.83	33.03	37.59	Turonian	early Late Cretaceous	93.98	-61.7
O'Connor et al (2019)	ODP1138			0.83	33.08	37.67	Turonian	early Late Cretaceous	91.52	-55.1
O'Connor et al (2019)	ODP1138			0.85	33.86	38.98	Turonian	early Late Cretaceous	91.87	-55.1
O'Connor et al (2019)	ODP1138			0.83	33.14	37.77	Turonian	early Late Cretaceous	92.17	-55.1
O'Connor et al (2019)	ODP1138			0.86	33.98	39.17	Turonian	early Late Cretaceous	92.2	-55.1
O'Connor et al (2019)	ODP1138			0.83	33.21	37.89	Turonian	early Late Cretaceous	92.25	-55.1
O'Connor et al (2019)	ODP1138			0.89	35.2	41.29	Turonian	early Late Cretaceous	93.27	-55.1
O'Connor et al (2019)	ODP1138			0.89	35.27	41.41	Turonian	early Late Cretaceous	93.46	-55.1
O'Connor et al (2019)	ODP1138			0.88	34.8	40.58	Turonian	early Late Cretaceous	93.5	-55.1
O'Connor et al (2019)	ODP1138			0.88	34.65	40.33	Turonian	early Late Cretaceous	93.54	-55.1
O'Connor et al (2019)	ODP1138			0.87	34.46	39.99	Turonian	early Late Cretaceous	93.58	-55.1
O'Connor et al (2019)	ODP1138			0.89	35.21	41.31	Turonian	early Late Cretaceous	93.71	-55.1
O'Connor et al (2019)	ODP1138			0.88	34.64	40.3	Turonian	early Late Cretaceous	93.75	-55.1
O'Connor et al (2019)	ODP1138			0.9	35.31	41.49	Turonian	early Late Cretaceous	93.79	-55.1
Ruebsam et al. (2020)	Valdorbia			0.76	30.5	31.4	To-Serpentinum	Early Jurassic		15
Ruebsam et al. (2020)	Valdorbia			0.71	28.6	28.3	To-Serpentinum	Early Jurassic		15
Ruebsam et al. (2020)	Valdorbia			0.61	23.8	21.1	To-Serpentinum	Early Jurassic		15
Ruebsam et al. (2020)	Valdorbia			0.65	25.6	23.8	To-Serpentinum	Early Jurassic		15
Ruebsam et al. (2020)	Valdorbia			0.73	29.2	29.3	To-Serpentinum	Early Jurassic		15
Ruebsam et al. (2020)	Valdorbia			0.75	29.9	30.4	To-Serpentinum	Early Jurassic		15
Ruebsam et al. (2020)	Valdorbia			0.6	23.3	20.4	To-NJT6 (am_unassigned)	Early Jurassic		15
Ruebsam et al. (2020)	Valdorbia			0.68	27.2	26.1	To-NJT6 (am_unassigned)	Early Jurassic		15
Ruebsam et al. (2020)	Valdorbia			0.8	32.2	34.1	To-NJT6 (am_unassigned)	Early Jurassic		15
Ruebsam et al. (2020)	Valdorbia			0.76	30.4	31.3	To-NJT6 (am_unassigned)	Early Jurassic		15
Ruebsam et al. (2020)	Valdorbia			0.79	31.5	33.2	To-NJT6 (am_unassigned)	Early Jurassic		15
Ruebsam et al. (2020)	Valdorbia			0.8	31.8	33.7	To-NJT6 (am_unassigned)	Early Jurassic		15
Ruebsam et al. (2020)	Valdorbia			0.71	28.4	28	To-Polymorphum	Early Jurassic		15
Ruebsam et al. (2020)	Valdorbia			0.56	21.3	17.9	To-Polymorphum	Early Jurassic		15
Ruebsam et al. (2020)	Valdorbia			0.62	24.2	21.7	To-Polymorphum	Early Jurassic		15
Ruebsam et al. (2020)	Valdorbia			0.64	25.41	23.4	To-Polymorphum	Early Jurassic		15
Ruebsam et al. (2020)	La Cerradura			0.82	32.8	35.5	To-Serpentinum	Early Jurassic		20
Ruebsam et al. (2020)	La Cerradura			0.58	22.5	19.5	To-Serpentinum	Early Jurassic		20
Ruebsam et al. (2020)	La Cerradura			0.75	29.9	30.4	To-Serpentinum	Early Jurassic		20
Ruebsam et al. (2020)	La Cerradura			0.8	31.9	33.9	To-Serpentinum	Early Jurassic		20
Ruebsam et al. (2020)	La Cerradura			0.68	27.1	25.9	To-Serpentinum	Early Jurassic		20
Ruebsam et al. (2020)	La Cerradura			0.6	23.2	20.3	To-NJT6 (am_unassigned)	Early Jurassic		20
Ruebsam et al. (2020)	La Cerradura			0.65	26	24.3	To-NJT6 (am_unassigned)	Early Jurassic		20
Ruebsam et al. (2020)	La Cerradura			0.64	25.4	23.4	To-Polymorphum	Early Jurassic		20
Ruebsam et al. (2020)	La Cerradura			0.64	25.4	23.5	To-Polymorphum	Early Jurassic		20
Ruebsam et al. (2020)	La Cerradura			0.69	27.6	26.6	To-Polymorphum	Early Jurassic		20
Ruebsam et al. (2020)	La Cerradura			0.71	28.5	28.1	To-Polymorphum	Early Jurassic		20
Ruebsam et al. (2020)	La Cerradura			0.7	27.8	27	NJT(5 am_unassigned)	Early Jurassic		20
Ruebsam et al. (2020)	La Cerradura			0.75	30.2	31	NJT(5 am_unassigned)	Early Jurassic		20
Ruebsam et al. (2020)	La Cerradura			0.72	28.9	28.8	Pl-Emacianum	Early Jurassic		20
Ruebsam et al. (2020)	La Cerradura			0.72	28.9	28.7	Pl-Emacianum	Early Jurassic		20
Ruebsam et al. (2020)	La Cerradura			0.66	26.4	24.8	Pl-Emacianum	Early Jurassic		20
Ruebsam et al. (2020)	La Cerradura			0.67	26.6	25.2	Pl-Emacianum	Early Jurassic		20
Ruebsam et al. (2020)	La Cerradura			0.67	26.8	25.4	Pl-Emacianum	Early Jurassic		20
Ruebsam et al. (2020)	La Cerradura			0.65	25.6	23.7	Pl-Emacianum	Early Jurassic		20
Ruebsam et al. (2020)	La Cerradura			0.65	25.9	24.2	Pl-Emacianum	Early Jurassic		20
O'Brien et al., (2017)	ODP 1049			0.857	34.0159	39.2353	Albian-Aptian	Early Cretcaeous	112.556	31.8	Wagner et al 2008
O'Brien et al., (2017)	ODP 1049			0.89	36.498	41.1765	Albian-Aptian	Early Cretcaeous	112.566	31.8	Wagner et al 2008/Schouten et al 2003
O'Brien et al., (2017)	ODP 1049			0.896	35.6448	41.5294	Albian-Aptian	Early Cretcaeous	112.568	31.8	Wagner et al 2008/Schouten et al 2003
O'Brien et al., (2017)	ODP 1049			0.85	33.7723	38.8235	Albian-Aptian	Early Cretcaeous	112.573	31.8	Wagner et al 2008
O'Brien et al., (2017)	ODP 1049			0.852	33.8421	38.9412	Albian-Aptian	Early Cretcaeous	112.577	31.8	Wagner et al 2008
O'Brien et al., (2017)	DSDP 603			0.902592	35.5556	41.9172	Hauterivian	Early Cretcaeous	131.897	28.77	Littler et al 2011
O'Brien et al., (2017)	DSDP 603			0.890756	35.1635	41.2209	Hauterivian	Early Cretcaeous	132.196	28.77	Littler et al 2011
O'Brien et al., (2017)	DSDP 603			0.910598	35.818	42.3881	Hauterivian	Early Cretcaeous	132.457	28.77	Littler et al 2011
O'Brien et al., (2017)	DSDP 603			0.908932	35.7635	42.2901	Hauterivian	Early Cretcaeous	132.532	28.77	Littler et al 2011
O'Brien et al., (2017)	DSDP 603			0.91215	35.8685	42.4794	Valanginian	Early Cretcaeous	133.027	28.77	Littler et al 2011
O'Brien et al., (2017)	DSDP 603			0.903896	35.5985	41.9939	Valanginian	Early Cretcaeous	133.027	28.77	Littler et al 2011
O'Brien et al., (2017)	DSDP 603			0.921443	36.1696	43.0261	Valanginian	Early Cretcaeous	133.164	28.77	Littler et al 2011
O'Brien et al., (2017)	DSDP 603			0.913667	35.9179	42.5686	Valanginian	Early Cretcaeous	133.424	28.77	Littler et al 2011
O'Brien et al., (2017)	DSDP 603			0.89713	35.3753	41.5959	Valanginian	Early Cretcaeous	133.548	28.77	Littler et al 2011
O'Brien et al., (2017)	DSDP 603			0.913835	35.9234	42.5785	Valanginian	Early Cretcaeous	134.224	28.77	Littler et al 2011
O'Brien et al., (2017)	DSDP 603			0.901842	35.5309	41.873	Valanginian	Early Cretcaeous	135.474	27.57	Littler et al 2011
O'Brien et al., (2017)	DSDP 603			0.918305	36.0683	42.8415	Valanginian	Early Cretcaeous	135.618	27.57	Littler et al 2011
O'Brien et al., (2017)	DSDP 603			0.901733	35.5273	41.8666	Valanginian	Early Cretcaeous	135.903	27.57	Littler et al 2011
O'Brien et al., (2017)	DSDP 603			0.882004	34.8702	40.7061	Valanginian	Early Cretcaeous	136.183	27.57	Littler et al 2011
O'Brien et al., (2017)	DSDP 603			0.904194	35.6083	42.0114	Valanginian	Early Cretcaeous	136.299	27.57	Littler et al 2011
O'Brien et al., (2017)	DSDP 603			0.869357	34.4412	39.9622	Valanginian	Early Cretcaeous	136.552	27.57	Littler et al 2011
O'Brien et al., (2017)	DSDP 603			0.90928	35.7749	42.3106	Valanginian	Early Cretcaeous	136.92	27.57	Littler et al 2011
O'Brien et al., (2017)	DSDP 603			0.887105	35.0415	41.0062	Valanginian	Early Cretcaeous	136.973	27.57	Littler et al 2011
O'Brien et al., (2017)	DSDP 367			0.92	36.1231	42.9412	Cenomanian	early Late Cretaceous	94.1644	6.73	Forster et al 2007 (Geology)
O'Brien et al., (2017)	DSDP 367			0.92	36.1231	42.9412	Cenomanian	early Late Cretaceous	94.1922	6.73	Forster et al 2007 (Geology)
O'Brien et al., (2017)	DSDP 367			0.94	36.7619	44.1176	Cenomanian	early Late Cretaceous	94.2133	6.73	Forster et al 2007 (Geology)
O'Brien et al., (2017)	DSDP 367			0.91	35.1308	42.3529	Cenomanian	early Late Cretaceous	94.2227	6.73	Schouten et al 2003/Forster et al 2007 (Geology)
O'Brien et al., (2017)	DSDP 367			0.87	34.4631	40	Cenomanian	early Late Cretaceous	94.2446	6.73	Forster et al 2007 (Geology)
O'Brien et al., (2017)	DSDP 367			0.84	34.9595	38.2353	Cenomanian	early Late Cretaceous	94.2549	6.73	Schouten et al 2003/Forster et al 2007 (Geology)
O'Brien et al., (2017)	DSDP 367			0.88	34.8026	40.5882	Cenomanian	early Late Cretaceous	94.2603	6.73	Forster et al 2007 (Geology)
O'Brien et al., (2017)	DSDP 367			0.87	34.4631	40	Cenomanian	early Late Cretaceous	94.2657	6.73	Forster et al 2007 (Geology)
O'Brien et al., (2017)	DSDP 367			0.95	37.0763	44.7059	Cenomanian	early Late Cretaceous	94.2809	6.73	Forster et al 2007 (Geology)
O'Brien et al., (2017)	DSDP 367			0.92	36.1231	42.9412	Cenomanian	early Late Cretaceous	94.2858	6.73	Forster et al 2007 (Geology)
O'Brien et al., (2017)	DSDP 367			0.92	37.1447	42.9412	Cenomanian	early Late Cretaceous	94.2903	6.73	Schouten et al 2003/Forster et al 2007 (Geology)
O'Brien et al., (2017)	DSDP 367			0.94	36.7619	44.1176	Cenomanian	early Late Cretaceous	94.3033	6.73	Forster et al 2007 (Geology)
O'Brien et al., (2017)	DSDP 367			0.93	37.2744	43.5294	Cenomanian	early Late Cretaceous	94.3078	6.73	Schouten et al 2003/Forster et al 2007 (Geology)
O'Brien et al., (2017)	DSDP 367			0.91	36.1225	42.3529	Cenomanian	early Late Cretaceous	94.3266	6.73	Schouten et al 2003/Forster et al 2007 (Geology)
O'Brien et al., (2017)	DSDP 367			0.87	34.4631	40	Cenomanian	early Late Cretaceous	94.3504	6.73	Forster et al 2007 (Geology)
O'Brien et al., (2017)	DSDP 367			0.88	34.8026	40.5882	Cenomanian	early Late Cretaceous	94.3575	6.73	Forster et al 2007 (Geology)
O'Brien et al., (2017)	DSDP 367			0.86	34.1197	39.4118	Cenomanian	early Late Cretaceous	94.3665	6.73	Forster et al 2007 (Geology)
O'Brien et al., (2017)	DSDP 367			0.9	35.4702	41.7647	Cenomanian	early Late Cretaceous	94.3754	6.73	Forster et al 2007 (Geology)
O'Brien et al., (2017)	DSDP 367			0.92	36.6663	42.9412	Cenomanian	early Late Cretaceous	94.3844	6.73	Schouten et al 2003/Forster et al 2007 (Geology)
O'Brien et al., (2017)	DSDP 367			0.86	34.1197	39.4118	Cenomanian	early Late Cretaceous	94.3956	6.73	Forster et al 2007 (Geology)
O'Brien et al., (2017)	DSDP 367			0.87	35.2776	40	Cenomanian	early Late Cretaceous	94.401	6.73	Schouten et al 2003/Forster et al 2007 (Geology)
O'Brien et al., (2017)	DSDP 367			0.88	35.11	40.5882	Cenomanian	early Late Cretaceous	94.5157	6.73	Schouten et al 2003/Forster et al 2007 (Geology)
O'Brien et al., (2017)	DSDP 367			0.91	35.3928	42.3529	Cenomanian	early Late Cretaceous	94.5251	6.73	Schouten et al 2003/Forster et al 2007 (Geology)
O'Brien et al., (2017)	DSDP 367			0.88	36.3191	40.5882	Cenomanian	early Late Cretaceous	94.5587	6.73	Schouten et al 2003/Forster et al 2007 (Geology)
O'Brien et al., (2017)	DSDP 367			0.91	35.6613	42.3529	Cenomanian	early Late Cretaceous	94.6053	6.73	Schouten et al 2003/Forster et al 2007 (Geology)
O'Brien et al., (2017)	DSDP 367			0.92	36.9311	42.9412	Cenomanian	early Late Cretaceous	94.681	6.73	Schouten et al 2003/Forster et al 2007 (Geology)
O'Brien et al., (2017)	DSDP 463			0.799861	31.9662	35.8741	Barremian	Early Cretcaeous	124.264	-17.24	Schouten et al 2003
O'Brien et al., (2017)	DSDP 463			0.818125	32.6369	36.9485	Barremian	Early Cretcaeous	124.325	-17.24	Schouten et al 2003
O'Brien et al., (2017)	DSDP 463			0.792412	31.6883	35.436	Barremian	Early Cretcaeous	124.531	-17.24	Schouten et al 2003
O'Brien et al., (2017)	DSDP 463			0.843662	33.5499	38.4507	Barremian	Early Cretcaeous	124.667	-17.24	Schouten et al 2003
O'Brien et al., (2017)	DSDP 534			0.916826	36.0204	42.7544	Hauterivian	Early Cretcaeous	130.963	23.72	Littler et al 2011
O'Brien et al., (2017)	DSDP 534			0.91854	36.0759	42.8553	Hauterivian	Early Cretcaeous	131.195	23.72	Littler et al 2011
O'Brien et al., (2017)	DSDP 534			0.916389	36.0063	42.7288	Hauterivian	Early Cretcaeous	131.944	23.72	Littler et al 2011
O'Brien et al., (2017)	DSDP 534			0.926685	36.3382	43.3344	Hauterivian	Early Cretcaeous	132.267	23.72	Littler et al 2011
O'Brien et al., (2017)	DSDP 534			0.913358	35.9078	42.5505	Hauterivian	Early Cretcaeous	132.286	23.72	Littler et al 2011
O'Brien et al., (2017)	DSDP 534			0.914376	35.9409	42.6104	Hauterivian	Early Cretcaeous	132.456	23.72	Littler et al 2011
O'Brien et al., (2017)	DSDP 534			0.919674	36.1125	42.922	Hauterivian	Early Cretcaeous	132.523	23.72	Littler et al 2011
O'Brien et al., (2017)	DSDP 534			0.899172	35.4428	41.716	Hauterivian	Early Cretcaeous	132.588	23.72	Littler et al 2011
O'Brien et al., (2017)	DSDP 534			0.91836	36.0701	42.8447	Hauterivian	Early Cretcaeous	132.798	23.72	Littler et al 2011
O'Brien et al., (2017)	DSDP 534			0.921053	36.167	43.0212	Valanginian	Early Cretcaeous	133.265	23.72	Littler et al 2011
O'Brien et al., (2017)	DSDP 534			0.91867	36.0801	42.863	Valanginian	Early Cretcaeous	133.459	23.72	Littler et al 2011
O'Brien et al., (2017)	DSDP 534			0.908975	35.765	42.2926	Valanginian	Early Cretcaeous	133.648	23.72	Littler et al 2011
O'Brien et al., (2017)	DSDP 534			0.927952	36.3358	43.33	Valanginian	Early Cretcaeous	134.251	23.72	Littler et al 2011
O'Brien et al., (2017)	DSDP 534			0.920941	36.1535	42.9965	Valanginian	Early Cretcaeous	134.537	23.72	Littler et al 2011
O'Brien et al., (2017)	DSDP 534			0.917397	36.0389	42.788	Valanginian	Early Cretcaeous	134.574	23.72	Littler et al 2011
O'Brien et al., (2017)	DSDP 534			0.918759	36.083	42.8682	Valanginian	Early Cretcaeous	134.669	23.72	Littler et al 2011
O'Brien et al., (2017)	DSDP 534			0.919289	36.1001	42.8993	Valanginian	Early Cretcaeous	134.734	23.72	Littler et al 2011
O'Brien et al., (2017)	DSDP 534			0.920161	36.1283	42.9506	Valanginian	Early Cretcaeous	134.881	23.72	Littler et al 2011
O'Brien et al., (2017)	DSDP 534			0.913898	35.9254	42.5822	Valanginian	Early Cretcaeous	134.936	23.72	Littler et al 2011
O'Brien et al., (2017)	DSDP 534			0.91352	35.9131	42.56	Valanginian	Early Cretcaeous	135.004	23.72	Littler et al 2011
O'Brien et al., (2017)	DSDP 534			0.915921	35.9911	42.7012	Valanginian	Early Cretcaeous	135.008	22.89	Littler et al 2011
O'Brien et al., (2017)	DSDP 534			0.918682	36.0908	42.8824	Valanginian	Early Cretcaeous	135.814	22.89	Littler et al 2011
O'Brien et al., (2017)	DSDP 534			0.931092	36.4791	43.5936	Valanginian	Early Cretcaeous	136.529	22.89	Littler et al 2011
O'Brien et al., (2017)	DSDP 534			0.939463	36.6596	43.9274	Valanginian	Early Cretcaeous	136.822	22.89	Littler et al 2011
O'Brien et al., (2017)	DSDP 534			0.930883	36.4724	43.5813	Valanginian	Early Cretcaeous	137.126	22.89	Littler et al 2011
O'Brien et al., (2017)	DSDP 534			0.934068	36.5739	43.7687	Valanginian	Early Cretcaeous	137.916	22.89	Littler et al 2011
O'Brien et al., (2017)	DSDP 534			0.934505	36.5878	43.7944	Valanginian	Early Cretcaeous	138.113	22.89	Littler et al 2011
O'Brien et al., (2017)	DSDP 534			0.940365	36.7735	44.1391	Valanginian	Early Cretcaeous	138.186	22.89	Littler et al 2011
O'Brien et al., (2017)	DSDP 534			0.940367	36.7736	44.1393	Valanginian	Early Cretcaeous	138.334	22.89	Littler et al 2011
O'Brien et al., (2017)	DSDP 534			0.929021	36.4129	43.4718	Valanginian	Early Cretcaeous	138.498	22.89	Littler et al 2011
O'Brien et al., (2017)	DSDP 534			0.919173	36.0964	42.8925	Valanginian	Early Cretcaeous	138.863	22.89	Littler et al 2011
O'Brien et al., (2017)	DSDP 534			0.907609	35.7203	42.2123	Valanginian	Early Cretcaeous	139.109	22.89	Littler et al 2011
O'Brien et al., (2017)	DSDP 534			0.922621	36.2076	43.0954	Valanginian	Early Cretcaeous	139.422	22.89	Littler et al 2011
O'Brien et al., (2017)	DSDP 534			0.902901	35.5658	41.9354	Valanginian	Early Cretcaeous	139.557	22.89	Littler et al 2011
O'Brien et al., (2017)	DSDP 534			0.907903	35.7299	42.2296	Valanginian	Early Cretcaeous	139.603	22.89	Littler et al 2011
O'Brien et al., (2017)	ODP 766			0.689611	27.5605	29.3889	Hauterivian	Early Cretcaeous	129.504	-49.92	Littler et al 2011
O'Brien et al., (2017)	ODP 766			0.66036	26.273	27.6682	Hauterivian	Early Cretcaeous	130.306	-49.92	Littler et al 2011
O'Brien et al., (2017)	ODP 766			0.641768	25.4247	26.5746	Hauterivian	Early Cretcaeous	131.582	-49.92	Littler et al 2011
O'Brien et al., (2017)	ODP 766			0.655842	26.069	27.4024	Hauterivian	Early Cretcaeous	132.33	-49.92	Littler et al 2011
O'Brien et al., (2017)	ODP 766			0.653547	25.6136	26.8181	Hauterivian	Early Cretcaeous	132.623	-49.92	Littler et al 2011
O'Brien et al., (2017)	ODP 766			0.649318	25.7721	27.0187	Hauterivian	Early Cretcaeous	132.92	-49.92	Littler et al 2011
O'Brien et al., (2017)	ODP 766			0.640794	25.3795	26.5173	Valanginian	Early Cretcaeous	133.013	-49.92	Littler et al 2011
O'Brien et al., (2017)	ODP 766			0.66393	26.4332	27.8782	Valanginian	Early Cretcaeous	133.295	-49.92	Littler et al 2011
O'Brien et al., (2017)	ODP 766			0.668542	26.6388	28.1495	Valanginian	Early Cretcaeous	133.386	-49.92	Littler et al 2011
O'Brien et al., (2017)	ODP 766			0.69428	27.761	29.6635	Valanginian	Early Cretcaeous	133.533	-49.92	Littler et al 2011
O'Brien et al., (2017)	ODP 766			0.71029	28.4382	30.6053	Valanginian	Early Cretcaeous	133.89	-49.92	Littler et al 2011
O'Brien et al., (2017)	ODP 766			0.645549	25.5992	26.797	Valanginian	Early Cretcaeous	134.022	-49.92	Littler et al 2011
O'Brien et al., (2017)	ODP 766			0.632196	24.9783	26.0116	Valanginian	Early Cretcaeous	134.142	-49.92	Littler et al 2011
O'Brien et al., (2017)	ODP 766			0.640107	25.3477	26.4769	Valanginian	Early Cretcaeous	134.219	-49.92	Littler et al 2011
O'Brien et al., (2017)	ODP 766			0.640749	25.3775	26.5147	Valanginian	Early Cretcaeous	134.416	-49.92	Littler et al 2011
O'Brien et al., (2017)	ODP 766			0.642104	25.4402	26.5943	Valanginian	Early Cretcaeous	134.639	-49.92	Littler et al 2011
O'Brien et al., (2017)	ODP 766			0.651934	25.8915	27.1726	Valanginian	Early Cretcaeous	134.876	-49.92	Littler et al 2011
O'Brien et al., (2017)	ODP 766			0.642749	25.47	26.6323	Valanginian	Early Cretcaeous	135.32	-50.53	Littler et al 2011
O'Brien et al., (2017)	ODP 766			0.663985	26.4356	27.8815	Valanginian	Early Cretcaeous	135.837	-50.53	Littler et al 201
O'Brien et al., (2017)	DSDP 249			0.671444	26.7674	28.3202	Berriasian- Barremian	Early Cretcaeous	137.89	-51.02	Littler et al 2011
O'Brien et al., (2017)	DSDP 249			0.600661	23.4583	24.1565	Berriasian- Barremian	Early Cretcaeous	137.89	-51.02	Littler et al 2011
O'Brien et al., (2017)	DSDP 249			0.607205	23.7801	24.5414	Berriasian- Barremian	Early Cretcaeous	137.89	-51.02	Littler et al 2011
O'Brien et al., (2017)	DSDP 249			0.585157	22.6815	23.2446	Berriasian- Barremian	Early Cretcaeous	137.89	-51.02	Littler et al 2011
O'Brien et al., (2017)	DSDP 249			0.580685	22.4535	22.9815	Berriasian- Barremian	Early Cretcaeous	137.89	-51.02	Littler et al 2011
O'Brien et al., (2017)	DSDP 249			0.585539	22.7008	23.267	Berriasian- Barremian	Early Cretcaeous	137.89	-51.02	Littler et al 2011
O'Brien et al., (2017)	ODP 692			0.743785	29.807	32.5756	Valanginian-Hauterivian	Early Cretcaeous	135.08	-51.72	Littler et al 2011
O'Brien et al., (2017)	ODP 692			0.724296	29.0183	31.4292	Valanginian-Hauterivian	Early Cretcaeous	135.08	-51.72	Littler et al 2011
O'Brien et al., (2017)	ODP 692			0.731525	29.3133	31.8544	Valanginian-Hauterivian	Early Cretcaeous	135.08	-51.72	Littler et al 2011
O'Brien et al., (2017)	ODP 692			0.714613	28.6185	30.8596	Valanginian-Hauterivian	Early Cretcaeous	135.08	-51.72	Littler et al 2011
O'Brien et al., (2017)	ODP 692			0.687992	27.4907	29.2937	Valanginian-Hauterivian	Early Cretcaeous	135.08	-51.72	Littler et al 2011
O'Brien et al., (2017)	ODP 692			0.692595	27.6888	29.5644	Valanginian-Hauterivian	Early Cretcaeous	135.08	-51.72	Littler et al 2011
O'Brien et al., (2017)	ODP 692			0.692575	27.6879	29.5632	Valanginian-Hauterivian	Early Cretcaeous	135.08	-51.72	Littler et al 2011
O'Brien et al., (2017)	ODP 692			0.678861	27.0938	28.7565	Valanginian-Hauterivian	Early Cretcaeous	135.08	-51.72	Littler et al 2011
O'Brien et al., (2017)	ODP 692			0.695034	27.7932	29.7079	Valanginian-Hauterivian	Early Cretcaeous	135.08	-51.72	Littler et al 2011
O'Brien et al., (2017)	ODP 692			0.73586	29.4888	32.1094	Valanginian-Hauterivian	Early Cretcaeous	135.08	-51.72	Littler et al 2011
O'Brien et al., (2017)	ODP 692			0.726758	29.1191	31.574	Valanginian-Hauterivian	Early Cretcaeous	135.08	-51.72	Littler et al 2011
O'Brien et al., (2017)	ODP 692			0.74568	29.8826	32.6871	Valanginian-Hauterivian	Early Cretcaeous	135.08	-51.72	Littler et al 2011
O'Brien et al., (2017)	FL-533			0.523481	19.3728	19.6165	Maastrichtien	Latest Cretaceous	71.05(+/- 1)	74.61	Jenkyns et al 2004
O'Brien et al., (2017)	FL-533			0.516885	18.9961	19.2285	Maastrichtien	Latest Cretaceous	71.05(+/- 1)	74.61	Jenkyns et al 2004
O'Brien et al., (2017)	FL-533			0.484635	17.0824	17.3315	Maastrichtien	Latest Cretaceous	71.05(+/- 1)	74.61	Jenkyns et al 2004
O'Brien et al., (2017)	FL-533			0.515515	18.9173	19.1479	Maastrichtien	Latest Cretaceous	71.05(+/- 1)	74.61	Jenkyns et al 2004
O'Brien et al., (2017)	DSDP 511			0.69	27.5773	29.4118	Aptian	Early Cretcaeous	116.743	-48.52	Jenkyns et al 2012
O'Brien et al., (2017)	DSDP 511			0.69	27.5773	29.4118	Aptian	Early Cretcaeous	118.005	-48.52	Jenkyns et al 2012
O'Brien et al., (2017)	DSDP 511			0.73	29.2513	31.7647	Aptian	Early Cretcaeous	119.034	-48.52	Jenkyns et al 2012
O'Brien et al., (2017)	DSDP 511			0.7	28.0047	30	Aptian	Early Cretcaeous	120.133	-48.52	Jenkyns et al 2012
O'Brien et al., (2017)	DSDP 511			0.72	28.8415	31.1765	Aptian	Early Cretcaeous	121.857	-48.52	Jenkyns et al 2012
O'Brien et al., (2017)	DSDP 511			0.72	28.8415	31.1765	Aptian	Early Cretcaeous	122.96	-48.52	Jenkyns et al 2012
O'Brien et al., (2017)	DSDP 511			0.71	28.4261	30.5882	Aptian	Early Cretcaeous	124.131	-48.52	Jenkyns et al 2012
O'Brien et al., (2017)	DSDP 511			0.71	28.4261	30.5882	Aptian	Early Cretcaeous	124.158	-48.52	Jenkyns et al 2012
O'Brien et al., (2017)	DSDP 511			0.7	28.0047	30	Aptian	Early Cretcaeous	124.161	-48.52	Jenkyns et al 2012
O'Brien et al., (2017)	DSDP 511			0.71	28.4261	30.5882	Aptian	Early Cretcaeous	124.215	-48.52	Jenkyns et al 2012
O'Brien et al., (2017)	DSDP 511			0.69	27.5773	29.4118	Aptian	Early Cretcaeous	124.237	-48.52	Jenkyns et al 2012
O'Brien et al., (2017)	DSDP 511			0.67	26.7035	28.2353	Aptian	Early Cretcaeous	124.351	-48.52	Jenkyns et al 2012
O'Brien et al., (2017)	DSDP 511			0.66	26.2568	27.6471	Aptian	Early Cretcaeous	124.433	-48.52	Jenkyns et al 2012
O'Brien et al., (2017)	DSDP 511			0.71	28.4261	30.5882	Aptian	Early Cretcaeous	124.481	-48.52	Jenkyns et al 2012
O'Brien et al., (2017)	DSDP 511			0.68	27.1436	28.8235	Aptian	Early Cretcaeous	124.729	-48.52	Jenkyns et al 2012
O'Brien et al., (2017)	DSDP 511			0.72	28.8415	31.1765	Barremian	Early Cretcaeous	125.141	-49.78	Jenkyns et al 2012
O'Brien et al., (2017)	DSDP 511			0.68	27.1436	28.8235	Barremian	Early Cretcaeous	125.186	-49.78	Jenkyns et al 2012
O'Brien et al., (2017)	DSDP 511			0.71	28.4261	30.5882	Barremian	Early Cretcaeous	125.347	-49.78	Jenkyns et al 2012
O'Brien et al., (2017)	DSDP 511			0.71	28.4261	30.5882	Barremian	Early Cretcaeous	126.003	-49.78	Jenkyns et al 2012
O'Brien et al., (2017)	DSDP 511			0.72	28.8415	31.1765	Barremian	Early Cretcaeous	126.269	-49.78	Jenkyns et al 2012
O'Brien et al., (2017)	DSDP 511			0.71	28.4261	30.5882	Barremian	Early Cretcaeous	126.334	-49.78	Jenkyns et al 2012
O'Brien et al., (2017)	DSDP 511			0.73	29.2513	31.7647	Barremian	Early Cretcaeous	126.362	-49.78	Jenkyns et al 2012
Jenkyns et al. 2012	DSDP 511			0.74	29.66		Mid Oxf-Low Tith	Late Jurassic		-52
Jenkyns et al. 2012	DSDP 511			0.74	29.66		Mid Oxf-Low Tith	Late Jurassic		-52
Jenkyns et al. 2012	DSDP 511			0.75	30.05		Mid Oxf-Low Tith	Late Jurassic		-52
Jenkyns et al. 2012	DSDP 511			0.71	28.43		Mid Oxf-Low Tith	Late Jurassic		-52
Jenkyns et al. 2012	DSDP 511			0.73	29.25		Mid Oxf-Low Tith	Late Jurassic		-52
Jenkyns et al. 2012	DSDP 511			0.74	29.66		Mid Oxf-Low Tith	Late Jurassic		-52
Jenkyns et al. 2012	DSDP 511			0.72	28.84		Mid Oxf-Low Tith	Late Jurassic		-52
Jenkyns et al. 2012	DSDP 511			0.73	29.25		Mid Oxf-Low Tith	Late Jurassic		-52
Jenkyns et al. 2012	DSDP 511			0.71	28.43		Mid Oxf-Low Tith	Late Jurassic		-52
Jenkyns et al. 2012	DSDP 511			0.71	28.43		Mid Oxf-Low Tith	Late Jurassic		-52
Jenkyns et al. 2012	DSDP 511			0.7	28		Mid Oxf-Low Tith	Late Jurassic		-52
Jenkyns et al. 2012	DSDP 511			0.71	28.43		Mid Oxf-Low Tith	Late Jurassic		-52
Jenkyns et al. 2012	DSDP 511			0.72	28.84		Mid Oxf-Low Tith	Late Jurassic		-52
Jenkyns et al. 2012	DSDP 511			0.72	28.84		Mid Oxf-Low Tith	Late Jurassic		-52
Jenkyns et al. 2012	DSDP 511			0.7	28		Mid Oxf-Low Tith	Late Jurassic		-52
Jenkyns et al. 2012	DSDP 511			0.72	28.84		Mid Oxf-Low Tith	Late Jurassic		-52
Jenkyns et al. 2012	DSDP 511			0.73	29.25		Mid Oxf-Low Tith	Late Jurassic		-52
Jenkyns et al. 2012	DSDP 511			0.72	28.84		Mid Oxf-Low Tith	Late Jurassic		-52
Jenkyns et al. 2012	DSDP 511			0.72	28.84		Mid Oxf-Low Tith	Late Jurassic		-52
Jenkyns et al. 2012	DSDP 511			0.72	28.84		Mid Oxf-Low Tith	Late Jurassic		-52
Jenkyns et al. 2012	DSDP 511			0.76	30.45		Mid Oxf-Low Tith	Late Jurassic		-52
Jenkyns et al. 2012	DSDP 511			0.7	28		Mid Oxf-Low Tith	Late Jurassic		-52
Jenkyns et al. 2012	DSDP 511			0.72	28.84		Mid Oxf-Low Tith	Late Jurassic		-52
Jenkyns et al. 2012	DSDP 511			0.71	28.43		Mid Oxf-Low Tith	Late Jurassic		-52
Jenkyns et al. 2012	DSDP 511			0.72	28.84		Mid Oxf-Low Tith	Late Jurassic		-52
Jenkyns et al. 2012	DSDP 511			0.71	28.43		Mid Oxf-Low Tith	Late Jurassic		-52
Jenkyns et al. 2012	DSDP 511			0.73	29.25		Mid Oxf-Low Tith	Late Jurassic		-52
Jenkyns et al. 2012	DSDP 511			0.69	27.58		Mid Oxf-Low Tith	Late Jurassic		-52
Jenkyns et al. 2012	DSDP 511			0.71	28.43		Mid Oxf-Low Tith	Late Jurassic		-52
Jenkyns et al. 2012	DSDP 511			0.69	27.58		Mid Oxf-Low Tith	Late Jurassic		-52
Jenkyns et al. 2012	DSDP 511			0.69	27.58		Mid Oxf-Low Tith	Late Jurassic		-52
Jenkyns et al. 2012	DSDP 511			0.71	28.43		Mid Oxf-Low Tith	Late Jurassic		-52
Jenkyns et al. 2012	DSDP 511			0.68	27.14		Mid Oxf-Low Tith	Late Jurassic		-52
Jenkyns et al. 2012	DSDP 511			0.64	25.34		Call-Oxf	Middle Jurrassic		-52
Jenkyns et al. 2012	DSDP 511			0.67	26.7		Call-Oxf	Middle Jurrassic		-52
O'Brien et al., (2017)	ODP 693			0.7	28.0047	30	Lower Albian	Early Cretaceous	114.2	-59.75	Jenkyns et al 2012
O'Brien et al., (2017)	ODP 693			0.7	28.0047	30	Lower Albian	Early Cretaceous	114.2	-59.75	Jenkyns et al 2012
O'Brien et al., (2017)	ODP 693			0.63	24.8749	25.8824	Lower Albian	Early Cretaceous	114.2	-59.75	Jenkyns et al 2012
O'Brien et al., (2017)	ODP 693			0.65	25.8033	27.0588	Lower Albian	Early Cretaceous	114.2	-59.75	Jenkyns et al 2012
O'Brien et al., (2017)	ODP 693			0.67	26.7035	28.2353	Lower Albian	Early Cretaceous	114.2	-59.75	Jenkyns et al 2012
O'Brien et al., (2017)	ODP 693			0.67	26.7035	28.2353	Lower Albian	Early Cretaceous	114.2	-59.75	Jenkyns et al 2012
O'Brien et al., (2017)	ODP 693			0.66	26.2568	27.6471	Lower Albian	Early Cretaceous	114.2	-59.75	Jenkyns et al 2012
O'Brien et al., (2017)	ODP 693			0.64	25.3427	26.4706	Upper Aptian	Early Cretaceous	114.2	-59.75	Jenkyns et al 2012
O'Brien et al., (2017)	ODP 693			0.66	26.2568	27.6471	Upper Aptian	Early Cretaceous	114.2	-59.75	Jenkyns et al 2012
O'Brien et al., (2017)	ODP 693			0.65	25.8033	27.0588	Upper Aptian	Early Cretaceous	114.2	-59.75	Jenkyns et al 2012
O'Brien et al., (2017)	ODP 693			0.67	26.7035	28.2353	Upper Aptian	Early Cretaceous	114.2	-59.75	Jenkyns et al 2012
O'Brien et al., (2017)	ODP 1207			0.826292	32.9319	37.4289	Barremian	Early Cretaceous	125.186	-2.61	Dumitrescu et al 2006
O'Brien et al., (2017)	ODP 1207			0.860603	34.1405	39.4472	Barremian	Early Cretaceous	125.203	-2.61	Dumitrescu et al 2006
O'Brien et al., (2017)	ODP 1207			0.849811	33.7656	38.8124	Barremian	Early Cretaceous	125.311	-2.61	Dumitrescu et al 2006
O'Brien et al., (2017)	ODP 1207			0.859255	34.0939	39.3679	Barremian	Early Cretaceous	125.334	-2.61	Dumitrescu et al 2006
O'Brien et al., (2017)	ODP 1207			0.85201	33.8424	38.9418	Barremian	Early Cretaceous	125.339	-2.61	Dumitrescu et al 2006
O'Brien et al., (2017)	ODP 1207			0.894997	35.3046	41.4704	Barremian	Early Cretaceous	125.343	-2.61	Dumitrescu et al 2006
O'Brien et al., (2017)	ODP 1207			0.893585	35.2577	41.3874	Barremian	Early Cretaceous	125.347	-2.61	Dumitrescu et al 2006
O'Brien et al., (2017)	ODP 1207			0.940225	36.769	44.1309	Barremian	Early Cretaceous	125.351	-2.61	Dumitrescu et al 2006
O'Brien et al., (2017)	ODP 1207			0.86671	34.3506	39.8065	Barremian	Early Cretaceous	125.354	-2.61	Dumitrescu et al 2006
O'Brien et al., (2017)	ODP 1207			0.921683	36.1774	43.0402	Barremian	Early Cretaceous	125.357	-2.61	Dumitrescu et al 2006
O'Brien et al., (2017)	ODP 1207			0.933852	36.567	43.756	Barremian	Early Cretaceous	125.36	-2.61	Dumitrescu et al 2006
O'Brien et al., (2017)	ODP 1207			0.903826	35.5962	41.9898	Barremian	Early Cretaceous	125.364	-2.61	Dumitrescu et al 2006
O'Brien et al., (2017)	ODP 1207			0.895864	35.3334	41.5214	Barremian	Early Cretaceous	125.369	-2.61	Dumitrescu et al 2006
O'Brien et al., (2017)	ODP 1207			0.882694	34.8934	40.7467	Barremian	Early Cretaceous	125.373	-2.61	Dumitrescu et al 2006
O'Brien et al., (2017)	ODP 1207			0.897261	35.3797	41.6036	Barremian	Early Cretaceous	125.377	-2.61	Dumitrescu et al 2006
O'Brien et al., (2017)	ODP 1207			0.925767	36.3087	43.2804	Barremian	Early Cretaceous	125.381	-2.61	Dumitrescu et al 2006
O'Brien et al., (2017)	ODP 1207			0.831481	33.1179	37.7342	Barremian	Early Cretaceous	125.385	-2.61	Dumitrescu et al 2006
O'Brien et al., (2017)	ODP 1207			0.785259	31.4189	35.0153	Barremian	Early Cretaceous	125.396	-2.61	Dumitrescu et al 2006
O'Brien et al., (2017)	ODP 1207			0.788766	31.5512	35.2215	Barremian	Early Cretaceous	125.402	-2.61	Dumitrescu et al 2006
O'Brien et al., (2017)	ODP 1207			0.854793	33.9393	39.1055	Barremian	Early Cretaceous	125.406	-2.61	Dumitrescu et al 2006
O'Brien et al., (2017)	ODP 1207			0.892482	35.221	41.3225	Barremian	Early Cretaceous	125.411	-2.61	Dumitrescu et al 2006
O'Brien et al., (2017)	ODP 1207			0.888658	35.0935	41.0975	Barremian	Early Cretaceous	125.416	-2.61	Dumitrescu et al 2006
O'Brien et al., (2017)	ODP 1207			0.904278	35.611	42.0163	Barremian	Early Cretaceous	125.421	-2.61	Dumitrescu et al 2006
O'Brien et al., (2017)	ODP 1207			0.957882	37.3217	45.1695	Barremian	Early Cretaceous	125.426	-2.61	Dumitrescu et al 2006
O'Brien et al., (2017)	ODP 1207			0.904301	35.6118	42.0177	Barremian	Early Cretaceous	125.432	-2.61	Dumitrescu et al 2006
O'Brien et al., (2017)	ODP 1207			0.935167	36.6088	43.8334	Barremian	Early Cretaceous	125.44	-2.61	Dumitrescu et al 2006
O'Brien et al., (2017)	ODP 1207			0.937175	36.6725	43.9515	Barremian	Early Cretaceous	125.446	-2.61	Dumitrescu et al 2006
O'Brien et al., (2017)	ODP 1207			0.931082	36.4788	43.593	Barremian	Early Cretaceous	125.451	-2.61	Dumitrescu et al 2006
O'Brien et al., (2017)	ODP 1207			0.923378	36.232	43.1399	Barremian	Early Cretaceous	125.457	-2.61	Dumitrescu et al 2006
O'Brien et al., (2017)	ODP 1207			0.929457	36.4269	43.4975	Barremian	Early Cretaceous	125.463	-2.61	Dumitrescu et al 2006
O'Brien et al., (2017)	ODP 1207			0.930358	36.4557	43.5505	Barremian	Early Cretaceous	125.468	-2.61	Dumitrescu et al 2006
O'Brien et al., (2017)	ODP 1207			0.859001	34.0852	39.353	Barremian	Early Cretaceous	125.473	-2.61	Dumitrescu et al 2006
O'Brien et al., (2017)	ODP 1207			0.816472	32.5768	36.8513	Barremian	Early Cretaceous	125.482	-2.61	Dumitrescu et al 2006
O'Brien et al., (2017)	ODP 1207			0.878937	34.7667	40.5257	Barremian	Early Cretaceous	125.486	-2.61	Dumitrescu et al 2006
O'Brien et al., (2017)	ODP 1207			0.888307	35.0817	41.0769	Barremian	Early Cretaceous	125.491	-2.61	Dumitrescu et al 2006
O'Brien et al., (2017)	ODP 1207			0.884701	34.9609	40.8647	Barremian	Early Cretaceous	125.496	-2.61	Dumitrescu et al 2006
O'Brien et al., (2017)	ODP 1207			0.875732	34.6582	40.3372	Barremian	Early Cretaceous	125.5	-2.61	Dumitrescu et al 2006
O'Brien et al., (2017)	ODP 1207			0.881792	34.8631	40.6937	Barremian	Early Cretaceous	125.504	-2.61	Dumitrescu et al 2006
O'Brien et al., (2017)	ODP 1207			0.87718	34.7073	40.4224	Barremian	Early Cretaceous	125.534	-2.61	Dumitrescu et al 2006
O'Brien et al., (2017)	ODP 1207			0.9	35.4702	41.7647	Barremian	Early Cretaceous	125.54	-2.61	Dumitrescu et al 2006
O'Brien et al., (2017)	ODP 1207			0.917656	36.0473	42.8033	Barremian	Early Cretaceous	125.546	-2.61	Dumitrescu et al 2006
O'Brien et al., (2017)	ODP 1258			0.92	36.1231	42.9412	Turonian	early Late Cretaceous	92.0791	3.91	Forster et al 2007 (Geology)
O'Brien et al., (2017)	ODP 1258			0.94	36.7619	44.1176	Turonian	early Late Cretaceous	92.4507	3.91	Forster et al 2007 (Geology)
O'Brien et al., (2017)	ODP 1258			0.93	36.4442	43.5294	Turonian	early Late Cretaceous	92.8137	3.91	Forster et al 2007 (Geology)
O'Brien et al., (2017)	ODP 1258			0.96	37.3874	45.2941	Turonian	early Late Cretaceous	93.1018	3.91	Forster et al 2007 (Geology)
O'Brien et al., (2017)	ODP 1258			0.94	36.7619	44.1176	Turonian	early Late Cretaceous	93.3467	3.91	Forster et al 2007 (Geology)
O'Brien et al., (2017)	ODP 1258			0.93	36.4442	43.5294	Turonian	early Late Cretaceous	93.7529	3.91	Forster et al 2007 (Geology)
O'Brien et al., (2017)	ODP 1258			0.93	36.4442	43.5294	Cenomanian	early Late Cretaceous	94.041	3.91	Forster et al 2007 (Geology)
O'Brien et al., (2017)	ODP 1258			0.93	36.4442	43.5294	Cenomanian	early Late Cretaceous	94.1446	3.91	Forster et al 2007 (Geology)
O'Brien et al., (2017)	ODP 1258			0.93	36.4442	43.5294	Cenomanian	early Late Cretaceous	94.2534	3.91	Forster et al 2007 (Geology)
O'Brien et al., (2017)	ODP 1258			0.94	36.7619	44.1176	Cenomanian	early Late Cretaceous	94.336	3.91	Forster et al 2007 (Geology)
O'Brien et al., (2017)	ODP 1258			0.93	36.4442	43.5294	Cenomanian	early Late Cretaceous	94.4677	3.91	Forster et al 2007 (Geology)
O'Brien et al., (2017)	ODP 1258			0.92	36.1231	42.9412	Cenomanian	early Late Cretaceous	94.5476	3.91	Forster et al 2007 (Geology)
O'Brien et al., (2017)	ODP 1258			0.89	35.1383	41.1765	Cenomanian	early Late Cretaceous	94.5546	3.91	Forster et al 2007 (Geology)
O'Brien et al., (2017)	ODP 1258			0.88	34.8026	40.5882	Cenomanian	early Late Cretaceous	94.6706	3.91	Forster et al 2007 (Geology)
O'Brien et al., (2017)	ODP 1258			0.89	35.1383	41.1765	Cenomanian	early Late Cretaceous	94.8433	3.91	Forster et al 2007 (Geology)
O'Brien et al., (2017)	ODP 1258			0.92	36.1231	42.9412	Cenomanian	early Late Cretaceous	94.9652	3.91	Forster et al 2007 (Geology)
O'Brien et al., (2017)	ODP 1258			0.89	35.1383	41.1765	Cenomanian	early Late Cretaceous	95.1048	5.38	Forster et al 2007 (Geology)
O'Brien et al., (2017)	ODP 1258			0.92	36.1231	42.9412	Cenomanian	early Late Cretaceous	95.2538	5.38	Forster et al 2007 (Geology)
O'Brien et al., (2017)	ODP 1258			0.88	34.8026	40.5882	Cenomanian	early Late Cretaceous	95.4242	5.38	Forster et al 2007 (Geology)
O'Brien et al., (2017)	ODP 1258			0.92	36.1231	42.9412	Cenomanian	early Late Cretaceous	95.6714	5.38	Forster et al 2007 (Geology)
O'Brien et al., (2017)	ODP 1258			0.85	33.7723	38.8235	Cenomanian	early Late Cretaceous	95.8382	5.38	Forster et al 2007 (Geology)
O'Brien et al., (2017)	ODP 1258			0.84	33.4207	38.2353	Cenomanian	early Late Cretaceous	96.0252	5.38	Forster et al 2007 (Geology)
O'Brien et al., (2017)	ODP 1258			0.86	34.1197	39.4118	Cenomanian	early Late Cretaceous	96.2334	5.38	Forster et al 2007 (Geology)
O'Brien et al., (2017)	ODP 1258			0.85	33.7723	38.8235	Cenomanian	early Late Cretaceous	96.3895	5.38	Forster et al 2007 (Geology)
O'Brien et al., (2017)	ODP 1258			0.86	34.1197	39.4118	Cenomanian	early Late Cretaceous	96.5126	5.38	Forster et al 2007 (Geology)
O'Brien et al., (2017)	ODP 1258			0.84	33.4207	38.2353	Cenomanian	early Late Cretaceous	96.6498	5.38	Forster et al 2007 (Geology)
O'Brien et al., (2017)	ODP 1258			0.85	33.7723	38.8235	Cenomanian	early Late Cretaceous	96.8698	5.38	Forster et al 2007 (Geology)
O'Brien et al., (2017)	ODP 1258			0.85	33.7723	38.8235	Cenomanian	early Late Cretaceous	97.0141	5.38	Forster et al 2007 (Geology)
O'Brien et al., (2017)	ODP 1258			0.85	33.7723	38.8235	Cenomanian	early Late Cretaceous	97.1668	5.38	Forster et al 2007 (Geology)
O'Brien et al., (2017)	ODP 1258			0.83	33.0649	37.6471	Cenomanian	early Late Cretaceous	97.3347	5.38	Forster et al 2007 (Geology)
O'Brien et al., (2017)	ODP 1258			0.82	32.7049	37.0588	Cenomanian	early Late Cretaceous	97.5382	5.38	Forster et al 2007 (Geology)
O'Brien et al., (2017)	ODP 1258			0.83	33.0649	37.6471	Cenomanian	early Late Cretaceous	97.6092	5.38	Forster et al 2007 (Geology)
O'Brien et al., (2017)	ODP 1258			0.84	33.4207	38.2353	Cenomanian	early Late Cretaceous	97.6388	5.38	Forster et al 2007 (Geology)
O'Brien et al., (2017)	ODP 1258			0.84	33.4207	38.2353	Cenomanian	early Late Cretaceous	97.9617	5.38	Forster et al 2007 (Geology)
O'Brien et al., (2017)	ODP 1258			0.84	33.4207	38.2353	Cenomanian	early Late Cretaceous	98.8088	5.38	Forster et al 2007 (Geology)
O'Brien et al., (2017)	ODP 1258			0.83	33.0649	37.6471	Cenomanian	early Late Cretaceous	99.3257	5.38	Forster et al 2007 (Geology)
O'Brien et al., (2017)	ODP 1258			0.82	32.7049	37.0588	Cenomanian	early Late Cretaceous	99.7457	5.38	Forster et al 2007 (Geology)
O'Brien et al., (2017)	ODP 1258			0.87	34.4631	40	Cenomanian	early Late Cretaceous	100.078	5.38	Forster et al 2007 (Geology)
O'Brien et al., (2017)	ODP 1258			0.85	33.7723	38.8235	Cenomanian	early Late Cretaceous	100.267	5.38	Forster et al 2007 (Geology)
O'Brien et al., (2017)	ODP 1258			0.87	34.4631	40	Albian	Early Cretaceous	100.51	5.38	Forster et al 2007 (Geology)
O'Brien et al., (2017)	ODP 1258			0.87	34.4631	40	Albian	Early Cretaceous	100.793	5.38	Forster et al 2007 (Geology)
O'Brien et al., (2017)	ODP 1258			0.89	35.1383	41.1765	Albian	Early Cretaceous	101.327	5.38	Forster et al 2007 (Geology)
O'Brien et al., (2017)	ODP 1258			0.88	34.8026	40.5882	Albian	Early Cretaceous	101.919	5.38	Forster et al 2007 (Geology)
O'Brien et al., (2017)	ODP 1258			0.89	35.1383	41.1765	Albian	Early Cretaceous	102.456	5.38	Forster et al 2007 (Geology)
O'Brien et al., (2017)	ODP 1258			0.86	34.1197	39.4118	Albian	Early Cretaceous	103.099	5.38	Forster et al 2007 (Geology)
O'Brien et al., (2017)	ODP 1258			0.89	35.1383	41.1765	Albian	Early Cretaceous	104.246	5.38	Forster et al 2007 (Geology)
O'Brien et al., (2017)	ODP 1258			0.89	35.1383	41.1765	Albian	Early Cretaceous	104.925	5.38	Forster et al 2007 (Geology)
O'Brien et al., (2017)	ODP 1259			0.86	34.1197	39.4118	Coniacien	early Late Cretaceous	86.1649	3.77	Forster et al 2007 (Geology)
O'Brien et al., (2017)	ODP 1259			0.88	34.8026	40.5882	Coniacien	early Late Cretaceous	86.2835	3.77	Forster et al 2007 (Geology)
O'Brien et al., (2017)	ODP 1259			0.89	35.1383	41.1765	Coniacien	early Late Cretaceous	87.0094	3.77	Forster et al 2007 (Geology)
O'Brien et al., (2017)	ODP 1259			0.889	35.1049	41.1176	Coniacien	early Late Cretaceous	87.294	3.77	Bornemann et al (2008)
O'Brien et al., (2017)	ODP 1259			0.905	35.6348	42.0588	Coniacien	early Late Cretaceous	87.3889	3.77	Bornemann et al (2008)
O'Brien et al., (2017)	ODP 1259			0.92	36.1231	42.9412	Coniacien	early Late Cretaceous	87.4932	3.77	Forster et al 2007 (Geology)
O'Brien et al., (2017)	ODP 1259			0.91	35.7984	42.3529	Coniacien	early Late Cretaceous	88.148	3.77	Forster et al 2007 (Geology)
O'Brien et al., (2017)	ODP 1259			0.904	35.6019	42	Coniacien	early Late Cretaceous	89.1261	3.77	Bornemann et al (2008)
O'Brien et al., (2017)	ODP 1259			0.91	35.7984	42.3529	Coniacien	early Late Cretaceous	89.4778	3.77	Forster et al 2007 (Geology)
O'Brien et al., (2017)	ODP 1259			0.91	35.7984	42.3529	Turonian	early Late Cretaceous	89.8288	3.77	Forster et al 2007 (Geology)
O'Brien et al., (2017)	ODP 1259			0.902	35.5361	41.8824	Turonian	early Late Cretaceous	89.8668	3.77	Bornemann et al (2008)
O'Brien et al., (2017)	ODP 1259			0.91	35.7984	42.3529	Turonian	early Late Cretaceous	89.8923	3.77	Forster et al 2007 (Geology)
O'Brien et al., (2017)	ODP 1259			0.92	36.1231	42.9412	Turonian	early Late Cretaceous	89.9546	3.77	Forster et al 2007 (Geology)
O'Brien et al., (2017)	ODP 1259			0.918	36.0584	42.8235	Turonian	early Late Cretaceous	89.9714	3.77	Bornemann et al (2008)
O'Brien et al., (2017)	ODP 1259			0.92	36.1231	42.9412	Turonian	early Late Cretaceous	90.0182	3.77	Forster et al 2007 (Geology)
O'Brien et al., (2017)	ODP 1259			0.914	35.9287	42.5882	Turonian	early Late Cretaceous	90.0282	3.77	Bornemann et al (2008)
O'Brien et al., (2017)	ODP 1259			0.91	35.7984	42.3529	Turonian	early Late Cretaceous	90.08	3.77	Forster et al 2007 (Geology)
O'Brien et al., (2017)	ODP 1259			0.94	36.7619	44.1176	Turonian	early Late Cretaceous	90.1356	3.77	Forster et al 2007 (Geology)
O'Brien et al., (2017)	ODP 1259			0.905	35.6348	42.0588	Turonian	early Late Cretaceous	90.1557	3.77	Bornemann et al (2008)
O'Brien et al., (2017)	ODP 1259			0.916	35.9937	42.7059	Turonian	early Late Cretaceous	90.2013	3.77	Bornemann et al (2008)
O'Brien et al., (2017)	ODP 1259			0.92	36.1231	42.9412	Turonian	early Late Cretaceous	90.2071	3.77	Forster et al 2007 (Geology)
O'Brien et al., (2017)	ODP 1259			0.94	36.7619	44.1176	Turonian	early Late Cretaceous	90.3146	3.77	Forster et al 2007 (Geology)
O'Brien et al., (2017)	ODP 1259			0.912	35.8636	42.4706	Turonian	early Late Cretaceous	90.4209	3.77	Bornemann et al (2008)
O'Brien et al., (2017)	ODP 1259			0.92	36.1231	42.9412	Turonian	early Late Cretaceous	90.5058	3.77	Forster et al 2007 (Geology)
O'Brien et al., (2017)	ODP 1259			0.95	37.0763	44.7059	Turonian	early Late Cretaceous	90.9004	3.77	Forster et al 2007 (Geology)
O'Brien et al., (2017)	ODP 1259			0.912	35.8636	42.4706	Turonian	early Late Cretaceous	90.9854	3.77	Bornemann et al (2008)
O'Brien et al., (2017)	ODP 1259			0.94	36.7619	44.1176	Turonian	early Late Cretaceous	91.474	3.77	Forster et al 2007 (Geology)
O'Brien et al., (2017)	ODP 1259			0.937	36.667	43.9412	Turonian	early Late Cretaceous	91.732	3.77	Bornemann et al (2008)
O'Brien et al., (2017)	ODP 1259			0.94	36.7619	44.1176	Turonian	early Late Cretaceous	91.8807	3.77	Forster et al 2007 (Geology)
O'Brien et al., (2017)	ODP 1259			0.94	36.7619	44.1176	Turonian	early Late Cretaceous	92.1963	3.77	Forster et al 2007 (Geology)
O'Brien et al., (2017)	ODP 1259			0.934	36.5717	43.7647	Turonian	early Late Cretaceous	92.4452	3.77	Bornemann et al (2008)
O'Brien et al., (2017)	ODP 1259			0.928	36.3803	43.4118	Turonian	early Late Cretaceous	92.5059	3.77	Bornemann et al (2008)
O'Brien et al., (2017)	ODP 1259			0.913	35.8962	42.5294	Turonian	early Late Cretaceous	92.5727	3.77	Bornemann et al (2008)
O'Brien et al., (2017)	ODP 1259			0.913	35.8962	42.5294	Turonian	early Late Cretaceous	92.6546	3.77	Bornemann et al (2008)
O'Brien et al., (2017)	ODP 1259			0.934	36.5717	43.7647	Turonian	early Late Cretaceous	92.7305	3.77	Bornemann et al (2008)
O'Brien et al., (2017)	ODP 1259			0.95	37.0763	44.7059	Turonian	early Late Cretaceous	92.7699	3.77	Forster et al 2007 (Geology)
O'Brien et al., (2017)	ODP 1259			0.937	36.667	43.9412	Turonian	early Late Cretaceous	92.7912	3.77	Bornemann et al (2008)
O'Brien et al., (2017)	ODP 1259			0.923	36.2198	43.1176	Turonian	early Late Cretaceous	92.8367	3.77	Bornemann et al (2008)
O'Brien et al., (2017)	ODP 1259			0.914	35.9287	42.5882	Turonian	early Late Cretaceous	92.8519	3.77	Bornemann et al (2008)
O'Brien et al., (2017)	ODP 1259			0.907	35.7003	42.1765	Turonian	early Late Cretaceous	92.8822	3.77	Bornemann et al (2008)
O'Brien et al., (2017)	ODP 1259			0.906	35.6676	42.1176	Turonian	early Late Cretaceous	92.8974	3.77	Bornemann et al (2008)
O'Brien et al., (2017)	ODP 1259			0.914	35.9287	42.5882	Turonian	early Late Cretaceous	92.9126	3.77	Bornemann et al (2008)
O'Brien et al., (2017)	ODP 1259			0.921	36.1554	43	Turonian	early Late Cretaceous	92.9323	3.77	Bornemann et al (2008)
O'Brien et al., (2017)	ODP 1259			0.918	36.0584	42.8235	Turonian	early Late Cretaceous	92.9429	3.77	Bornemann et al (2008)
O'Brien et al., (2017)	ODP 1259			0.921	36.1554	43	Turonian	early Late Cretaceous	92.9988	3.77	Bornemann et al (2008)
O'Brien et al., (2017)	ODP 1259			0.92	36.1231	42.9412	Turonian	early Late Cretaceous	93.0038	3.77	Bornemann et al (2008)
O'Brien et al., (2017)	ODP 1259			0.914	35.9287	42.5882	Turonian	early Late Cretaceous	93.0071	3.77	Bornemann et al (2008)
O'Brien et al., (2017)	ODP 1259			0.933	36.5399	43.7059	Turonian	early Late Cretaceous	93.0166	3.77	Bornemann et al (2008)
O'Brien et al., (2017)	ODP 1259			0.95	37.0763	44.7059	Turonian	early Late Cretaceous	93.0209	3.77	Forster et al 2007 (Geology)
O'Brien et al., (2017)	ODP 1259			0.926	36.3162	43.2941	Turonian	early Late Cretaceous	93.0216	3.77	Bornemann et al (2008)
O'Brien et al., (2017)	ODP 1259			0.94	36.7619	44.1176	Turonian	early Late Cretaceous	93.0299	3.77	Bornemann et al (2008)
O'Brien et al., (2017)	ODP 1259			0.939	36.7303	44.0588	Turonian	early Late Cretaceous	93.0315	3.77	Bornemann et al (2008)
O'Brien et al., (2017)	ODP 1259			0.917	36.0261	42.7647	Turonian	early Late Cretaceous	93.0365	3.77	Bornemann et al (2008)
O'Brien et al., (2017)	ODP 1259			0.928	36.3803	43.4118	Turonian	early Late Cretaceous	93.0397	3.77	Bornemann et al (2008)
O'Brien et al., (2017)	ODP 1259			0.932	36.508	43.6471	Turonian	early Late Cretaceous	93.0414	3.77	Bornemann et al (2008)
O'Brien et al., (2017)	ODP 1259			0.937	36.667	43.9412	Turonian	early Late Cretaceous	93.0431	3.77	Bornemann et al (2008)
O'Brien et al., (2017)	ODP 1259			0.941	36.7935	44.1765	Turonian	early Late Cretaceous	93.0464	3.77	Bornemann et al (2008)
O'Brien et al., (2017)	ODP 1259			0.939	36.7303	44.0588	Turonian	early Late Cretaceous	93.048	3.77	Bornemann et al (2008)
O'Brien et al., (2017)	ODP 1259			0.939	36.7303	44.0588	Turonian	early Late Cretaceous	93.0496	3.77	Bornemann et al (2008)
O'Brien et al., (2017)	ODP 1259			0.938	36.6987	44	Turonian	early Late Cretaceous	93.0513	3.77	Bornemann et al (2008)
O'Brien et al., (2017)	ODP 1259			0.931	36.4762	43.5882	Turonian	early Late Cretaceous	93.0546	3.77	Bornemann et al (2008)
O'Brien et al., (2017)	ODP 1259			0.922	36.1876	43.0588	Turonian	early Late Cretaceous	93.0579	3.77	Bornemann et al (2008)
O'Brien et al., (2017)	ODP 1259			0.936	36.6353	43.8824	Turonian	early Late Cretaceous	93.0612	3.77	Bornemann et al (2008)
O'Brien et al., (2017)	ODP 1259			0.94	36.7619	44.1176	Turonian	early Late Cretaceous	93.0695	3.77	Bornemann et al (2008)
O'Brien et al., (2017)	ODP 1259			0.94	36.7619	44.1176	Turonian	early Late Cretaceous	93.0704	3.77	Forster et al 2007 (Geology)
O'Brien et al., (2017)	ODP 1259			0.939	36.7303	44.0588	Turonian	early Late Cretaceous	93.0777	3.77	Bornemann et al (2008)
O'Brien et al., (2017)	ODP 1259			0.942	36.8251	44.2353	Turonian	early Late Cretaceous	93.0859	3.77	Bornemann et al (2008)
O'Brien et al., (2017)	ODP 1259			0.935	36.6035	43.8235	Turonian	early Late Cretaceous	93.0958	3.77	Bornemann et al (2008)
O'Brien et al., (2017)	ODP 1259			0.924	36.252	43.1765	Turonian	early Late Cretaceous	93.1041	3.77	Bornemann et al (2008)
O'Brien et al., (2017)	ODP 1259			0.939	36.7303	44.0588	Turonian	early Late Cretaceous	93.11	3.77	Bornemann et al (2008)
O'Brien et al., (2017)	ODP 1259			0.921	36.1554	43	Turonian	early Late Cretaceous	93.115	3.77	Bornemann et al (2008)
O'Brien et al., (2017)	ODP 1259			0.92	36.1231	42.9412	Turonian	early Late Cretaceous	93.1193	3.77	Forster et al 2007 (Geology)
O'Brien et al., (2017)	ODP 1259			0.931	36.4762	43.5882	Turonian	early Late Cretaceous	93.1612	3.77	Bornemann et al (2008)
O'Brien et al., (2017)	ODP 1259			0.89	35.1383	41.1765	Turonian	early Late Cretaceous	93.1688	3.77	Forster et al 2007 (Geology)
O'Brien et al., (2017)	ODP 1259			0.9	35.4702	41.7647	Turonian	early Late Cretaceous	93.2183	3.77	Forster et al 2007 (Geology)
O'Brien et al., (2017)	ODP 1259			0.913	35.8962	42.5294	Turonian	early Late Cretaceous	93.2222	3.77	Bornemann et al (2008)
O'Brien et al., (2017)	ODP 1259			0.92	36.1231	42.9412	Turonian	early Late Cretaceous	93.2678	3.77	Forster et al 2007 (Geology)
O'Brien et al., (2017)	ODP 1259			0.946	36.951	44.4706	Turonian	early Late Cretaceous	93.2816	3.77	Bornemann et al (2008)
O'Brien et al., (2017)	ODP 1259			0.92	36.1231	42.9412	Turonian	early Late Cretaceous	93.3008	3.77	Forster et al 2007 (Geology)
O'Brien et al., (2017)	ODP 1259			0.94	36.7619	44.1176	Turonian	early Late Cretaceous	93.309	3.77	Forster et al 2007 (Geology)
O'Brien et al., (2017)	ODP 1259			0.94	36.7619	44.1176	Turonian	early Late Cretaceous	93.3189	3.77	Forster et al 2007 (Geology)
O'Brien et al., (2017)	ODP 1259			0.86	34.1197	39.4118	Turonian	early Late Cretaceous	93.3665	3.77	Forster et al 2007 (Geology)
O'Brien et al., (2017)	ODP 1259			0.93	36.4442	43.5294	Turonian	early Late Cretaceous	93.416	3.77	Forster et al 2007 (Geology)
O'Brien et al., (2017)	ODP 1259			0.92	36.1231	42.9412	Turonian	early Late Cretaceous	93.4655	3.77	Forster et al 2007 (Geology)
O'Brien et al., (2017)	ODP 1259			0.92	36.1231	42.9412	Turonian	early Late Cretaceous	93.5149	3.77	Forster et al 2007 (Geology)
O'Brien et al., (2017)	ODP 1259			0.92	36.1231	42.9412	Turonian	early Late Cretaceous	93.5572	3.77	Forster et al 2007 (Geology)
O'Brien et al., (2017)	ODP 1259			0.93	36.4442	43.5294	Turonian	early Late Cretaceous	93.5951	3.77	Forster et al 2007 (Geology)
O'Brien et al., (2017)	ODP 1259			0.95	37.0763	44.7059	Turonian	early Late Cretaceous	93.6347	3.77	Forster et al 2007 (Geology)
O'Brien et al., (2017)	ODP 1259			0.92	36.1231	42.9412	Turonian	early Late Cretaceous	93.675	3.77	Forster et al 2007 (Geology)
O'Brien et al., (2017)	ODP 1259			0.92	36.1231	42.9412	Turonian	early Late Cretaceous	93.7384	3.77	Forster et al 2007 (Geology)
O'Brien et al., (2017)	ODP 1259			0.93	36.4442	43.5294	Turonian	early Late Cretaceous	93.7895	3.77	Forster et al 2007 (Geology)
O'Brien et al., (2017)	ODP 1259			0.94	36.7619	44.1176	Turonian	early Late Cretaceous	93.835	3.77	Forster et al 2007 (Geology)
O'Brien et al., (2017)	ODP 1259			0.94	36.7619	44.1176	Turonian	early Late Cretaceous	93.8717	3.77	Forster et al 2007 (Geology)
O'Brien et al., (2017)	ODP 1259			0.9	35.4702	41.7647	Turonian	early Late Cretaceous	93.8981	3.77	Forster et al 2007 (Geology)
O'Brien et al., (2017)	ODP 1260			0.92	36.1231	42.9412	Turonian	early Late Cretaceous	92.6352	3.74	Forster et al 2007 (Paleoceanography)
O'Brien et al., (2017)	ODP 1260			0.93	36.4442	43.5294	Turonian	early Late Cretaceous	92.8326	3.74	Forster et al 2007 (Paleoceanography)
O'Brien et al., (2017)	ODP 1260			0.92	36.1231	42.9412	Turonian	early Late Cretaceous	93.0571	3.74	Forster et al 2007 (Paleoceanography)
O'Brien et al., (2017)	ODP 1260			0.94	36.7619	44.1176	Turonian	early Late Cretaceous	93.1346	3.74	Forster et al 2007 (Paleoceanography)
O'Brien et al., (2017)	ODP 1260			0.94	36.7619	44.1176	Turonian	early Late Cretaceous	93.2507	3.74	Forster et al 2007 (Paleoceanography)
O'Brien et al., (2017)	ODP 1260			0.91	35.7984	42.3529	Turonian	early Late Cretaceous	93.2855	3.74	Forster et al 2007 (Paleoceanography)
O'Brien et al., (2017)	ODP 1260			0.89	35.1383	41.1765	Turonian	early Late Cretaceous	93.3242	3.74	Forster et al 2007 (Paleoceanography)
O'Brien et al., (2017)	ODP 1260			0.94	36.7619	44.1176	Turonian	early Late Cretaceous	93.3707	3.74	Forster et al 2007 (Paleoceanography)
O'Brien et al., (2017)	ODP 1260			0.94	36.7619	44.1176	Turonian	early Late Cretaceous	93.421	3.74	Forster et al 2007 (Paleoceanography)
O'Brien et al., (2017)	ODP 1260			0.94	36.7619	44.1176	Turonian	early Late Cretaceous	93.4713	3.74	Forster et al 2007 (Paleoceanography)
O'Brien et al., (2017)	ODP 1260			0.94	36.7619	44.1176	Turonian	early Late Cretaceous	93.5178	3.74	Forster et al 2007 (Paleoceanography)
O'Brien et al., (2017)	ODP 1260			0.95	37.0763	44.7059	Turonian	early Late Cretaceous	93.5371	3.74	Forster et al 2007 (Paleoceanography)
O'Brien et al., (2017)	ODP 1260			0.93	36.4442	43.5294	Turonian	early Late Cretaceous	93.5759	3.74	Forster et al 2007 (Paleoceanography)
O'Brien et al., (2017)	ODP 1260			0.93	36.4442	43.5294	Turonian	early Late Cretaceous	93.6184	3.74	Forster et al 2007 (Paleoceanography)
O'Brien et al., (2017)	ODP 1260			0.94	36.7619	44.1176	Turonian	early Late Cretaceous	93.6533	3.74	Forster et al 2007 (Paleoceanography)
O'Brien et al., (2017)	ODP 1260			0.94	36.7619	44.1176	Turonian	early Late Cretaceous	93.6842	3.74	Forster et al 2007 (Paleoceanography)
O'Brien et al., (2017)	ODP 1260			0.94	36.7619	44.1176	Turonian	early Late Cretaceous	93.723	3.74	Forster et al 2007 (Paleoceanography)
O'Brien et al., (2017)	ODP 1260			0.93	36.4442	43.5294	Turonian	early Late Cretaceous	93.7617	3.74	Forster et al 2007 (Paleoceanography)
O'Brien et al., (2017)	ODP 1260			0.94	36.7619	44.1176	Turonian	early Late Cretaceous	93.8004	3.74	Forster et al 2007 (Paleoceanography)
O'Brien et al., (2017)	ODP 1260			0.95	37.0763	44.7059	Turonian	early Late Cretaceous	93.8352	3.74	Forster et al 2007 (Paleoceanography)
O'Brien et al., (2017)	ODP 1260			0.93	36.4442	43.5294	Turonian	early Late Cretaceous	93.8662	3.74	Forster et al 2007 (Paleoceanography)
O'Brien et al., (2017)	ODP 1260			0.93	36.4442	43.5294	Turonian	early Late Cretaceous	93.901	3.74	Forster et al 2007 (Paleoceanography)
O'Brien et al., (2017)	ODP 1260			0.94	36.7619	44.1176	Cenomanian	early Late Cretaceous	93.9359	3.74	Forster et al 2007 (Paleoceanography)
O'Brien et al., (2017)	ODP 1260			0.94	36.7619	44.1176	Cenomanian	early Late Cretaceous	93.9784	3.74	Forster et al 2007 (Paleoceanography)
O'Brien et al., (2017)	ODP 1260			0.95	37.0763	44.7059	Cenomanian	early Late Cretaceous	94.0171	3.74	Forster et al 2007 (Paleoceanography)
O'Brien et al., (2017)	ODP 1260			0.93	36.4442	43.5294	Cenomanian	early Late Cretaceous	94.052	3.74	Forster et al 2007 (Paleoceanography)
O'Brien et al., (2017)	ODP 1260			0.9	35.4702	41.7647	Cenomanian	early Late Cretaceous	94.0946	3.74	Forster et al 2007 (Paleoceanography)
O'Brien et al., (2017)	ODP 1260			0.92	36.1231	42.9412	Cenomanian	early Late Cretaceous	94.1255	3.74	Forster et al 2007 (Paleoceanography)
O'Brien et al., (2017)	ODP 1260			0.93	36.4442	43.5294	Cenomanian	early Late Cretaceous	94.1488	3.74	Forster et al 2007 (Paleoceanography)
O'Brien et al., (2017)	ODP 1260			0.89	35.1383	41.1765	Cenomanian	early Late Cretaceous	94.1681	3.74	Forster et al 2007 (Paleoceanography)
O'Brien et al., (2017)	ODP 1260			0.93	36.4442	43.5294	Cenomanian	early Late Cretaceous	94.1875	3.74	Forster et al 2007 (Paleoceanography)
O'Brien et al., (2017)	ODP 1260			0.85	33.7723	38.8235	Cenomanian	early Late Cretaceous	94.1883	3.74	Forster et al 2007 (Paleoceanography)
O'Brien et al., (2017)	ODP 1260			0.92	36.1231	42.9412	Cenomanian	early Late Cretaceous	94.2157	3.74	Forster et al 2007 (Paleoceanography)
O'Brien et al., (2017)	ODP 1260			0.88	34.8026	40.5882	Cenomanian	early Late Cretaceous	94.2485	3.74	Forster et al 2007 (Paleoceanography)
O'Brien et al., (2017)	ODP 1260			0.89	35.1383	41.1765	Cenomanian	early Late Cretaceous	94.2595	3.74	Forster et al 2007 (Paleoceanography)
O'Brien et al., (2017)	ODP 1260			0.93	36.4442	43.5294	Cenomanian	early Late Cretaceous	94.2705	3.74	Forster et al 2007 (Paleoceanography)
O'Brien et al., (2017)	ODP 1260			0.94	36.7619	44.1176	Cenomanian	early Late Cretaceous	94.2924	3.74	Forster et al 2007 (Paleoceanography)
O'Brien et al., (2017)	ODP 1260			0.95	37.0763	44.7059	Cenomanian	early Late Cretaceous	94.3143	3.74	Forster et al 2007 (Paleoceanography)
O'Brien et al., (2017)	ODP 1260			0.95	37.0763	44.7059	Cenomanian	early Late Cretaceous	94.3252	3.74	Forster et al 2007 (Paleoceanography)
O'Brien et al., (2017)	ODP 1260			0.91	35.7984	42.3529	Cenomanian	early Late Cretaceous	94.3417	3.74	Forster et al 2007 (Paleoceanography)
O'Brien et al., (2017)	ODP 1260			0.92	36.1231	42.9412	Cenomanian	early Late Cretaceous	94.3636	3.74	Forster et al 2007 (Paleoceanography)
O'Brien et al., (2017)	ODP 1260			0.89	35.1383	41.1765	Cenomanian	early Late Cretaceous	94.38	3.74	Forster et al 2007 (Paleoceanography)
O'Brien et al., (2017)	ODP 1260			0.89	35.1383	41.1765	Cenomanian	early Late Cretaceous	94.3965	3.74	Forster et al 2007 (Paleoceanography)
O'Brien et al., (2017)	ODP 1260			0.89	35.1383	41.1765	Cenomanian	early Late Cretaceous	94.4348	3.74	Forster et al 2007 (Paleoceanography)
O'Brien et al., (2017)	ODP 1260			0.89	35.1383	41.1765	Cenomanian	early Late Cretaceous	94.4787	3.74	Forster et al 2007 (Paleoceanography)
O'Brien et al., (2017)	ODP 1260			0.89	35.1383	41.1765	Cenomanian	early Late Cretaceous	94.528	3.74	Forster et al 2007 (Paleoceanography)
O'Brien et al., (2017)	ODP 1260			0.89	35.1383	41.1765	Cenomanian	early Late Cretaceous	94.5882	3.74	Forster et al 2007 (Paleoceanography)
O'Brien et al., (2017)	ODP 1260			0.89	35.1383	41.1765	Cenomanian	early Late Cretaceous	94.6376	3.74	Forster et al 2007 (Paleoceanography)
O'Brien et al., (2017)	ODP 1260			0.88	34.8026	40.5882	Cenomanian	early Late Cretaceous	94.6869	3.74	Forster et al 2007 (Paleoceanography)
O'Brien et al., (2017)	ODP 1260			0.88	34.8026	40.5882	Cenomanian	early Late Cretaceous	94.7471	3.74	Forster et al 2007 (Paleoceanography)
O'Brien et al., (2017)	ODP 1260			0.88	34.8026	40.5882	Cenomanian	early Late Cretaceous	94.9608	3.74	Forster et al 2007 (Paleoceanography)
O'Brien et al., (2017)	ODP 1260			0.9	35.4702	41.7647	Cenomanian	early Late Cretaceous	95.1745	5.22	Forster et al 2007 (Paleoceanography)
O'Brien et al., (2017)	ODP 1260			0.88	34.8026	40.5882	Cenomanian	early Late Cretaceous	95.2896	5.22	Forster et al 2007 (Paleoceanography)
O'Brien et al., (2017)	ODP 1260			0.94	36.7619	44.1176	Cenomanian	early Late Cretaceous	95.5087	5.22	Forster et al 2007 (Paleoceanography)
O'Brien et al., (2017)	ODP 1260			0.89	35.1383	41.1765	Cenomanian	early Late Cretaceous	95.8375	5.22	Forster et al 2007 (Paleoceanography)
O'Brien et al., (2017)	ODP 1260			0.89	35.1383	41.1765	Cenomanian	early Late Cretaceous	96.084	5.22	Forster et al 2007 (Paleoceanography)
O'Brien et al., (2017)	ODP 1260			0.9	35.4702	41.7647	Cenomanian	early Late Cretaceous	96.358	5.22	Forster et al 2007 (Paleoceanography)
O'Brien et al., (2017)	ODP 1260			0.91	35.7984	42.3529	Cenomanian	early Late Cretaceous	96.6155	5.22	Forster et al 2007 (Paleoceanography)
O'Brien et al., (2017)	ODP 1260			0.89	35.1383	41.1765	Cenomanian	early Late Cretaceous	96.9442	5.22	Forster et al 2007 (Paleoceanography)
O'Brien et al., (2017)	ODP 1260			0.88	34.8026	40.5882	Cenomanian	early Late Cretaceous	97.1634	5.22	Forster et al 2007 (Paleoceanography)
O'Brien et al., (2017)	ODP 1260			0.88	34.8026	40.5882	Cenomanian	early Late Cretaceous	97.3332	5.22	Forster et al 2007 (Paleoceanography)
O'Brien et al., (2017)	DSDP 545			0.813955	32.485	36.7059	Albian	Early Cretaceous	103.768	27.15	McAnena et al 2013
O'Brien et al., (2017)	DSDP 545			0.825329	32.8973	37.3529	Albian	Early Cretaceous	103.915	27.15	McAnena et al 2013
O'Brien et al., (2017)	DSDP 545			0.818347	32.6449	36.9412	Albian	Early Cretaceous	104.023	27.15	McAnena et al 2013
O'Brien et al., (2017)	DSDP 545			0.828389	33.0072	37.5882	Albian	Early Cretaceous	104.192	27.15	McAnena et al 2013
O'Brien et al., (2017)	DSDP 545			0.852871	33.8724	39.1176	Albian	Early Cretaceous	109.838	27.15	McAnena et al 2013
O'Brien et al., (2017)	DSDP 545			0.825958	32.9199	37.4118	Albian	Early Cretaceous	109.88	27.15	McAnena et al 2013
O'Brien et al., (2017)	DSDP 545			0.815583	32.5444	36.8235	Albian	Early Cretaceous	109.915	27.15	McAnena et al 2013
O'Brien et al., (2017)	DSDP 545			0.753158	30.179	33.1176	Albian	Early Cretaceous	109.933	27.15	McAnena et al 2013
O'Brien et al., (2017)	DSDP 545			0.720342	28.8557	31.1765	Albian	Early Cretaceous	110.134	27.15	McAnena et al 2013
O'Brien et al., (2017)	DSDP 545			0.733238	29.3827	31.9412	Albian	Early Cretaceous	110.336	27.15	McAnena et al 2013
O'Brien et al., (2017)	DSDP 545			0.752872	30.1677	33.1176	Albian	Early Cretaceous	110.468	27.15	McAnena et al 2013
O'Brien et al., (2017)	DSDP 545			0.761408	30.5026	33.5882	Albian	Early Cretaceous	110.584	27.15	McAnena et al 2013
O'Brien et al., (2017)	DSDP 545			0.776276	31.0771	34.4868	Albian	Early Cretaceous	110.947	27.15	Hofmann et al 2008
O'Brien et al., (2017)	DSDP 545			0.779678	31.207	34.6869	Albian	Early Cretaceous	110.954	27.15	Hofmann et al 2008
O'Brien et al., (2017)	DSDP 545			0.751581	30.1167	33.0342	Albian	Early Cretaceous	110.967	27.15	Hofmann et al 2008
O'Brien et al., (2017)	DSDP 545			0.746891	29.9308	32.7583	Albian	Early Cretaceous	110.979	27.15	Hofmann et al 2008
O'Brien et al., (2017)	DSDP 545			0.730257	29.2617	31.7798	Albian	Early Cretaceous	110.99	27.15	Hofmann et al 2008
O'Brien et al., (2017)	DSDP 545			0.763492	30.5838	33.7348	Albian	Early Cretaceous	111	27.15	Hofmann et al 2008
O'Brien et al., (2017)	DSDP 545			0.749944	30.052	32.9379	Albian	Early Cretaceous	111.003	27.15	Hofmann et al 2008
O'Brien et al., (2017)	DSDP 545			0.760674	30.474	33.5691	Albian	Early Cretaceous	111.025	27.15	Hofmann et al 2008
O'Brien et al., (2017)	DSDP 545			0.748423	29.9917	32.8484	Albian	Early Cretaceous	111.029	27.15	Hofmann et al 2008
O'Brien et al., (2017)	DSDP 545			0.740257	29.6658	32.3529	Albian	Early Cretaceous	111.037	27.15	Wagner et al 2008
O'Brien et al., (2017)	DSDP 545			0.74888	30.0098	32.9412	Albian	Early Cretaceous	111.04	27.15	Wagner et al 2008
O'Brien et al., (2017)	DSDP 545			0.751139	30.0993	32.9412	Albian	Early Cretaceous	111.045	27.15	Wagner et al 2008
O'Brien et al., (2017)	DSDP 545			0.75129	30.1052	32.9412	Albian	Early Cretaceous	111.049	27.15	Wagner et al 2008
O'Brien et al., (2017)	DSDP 545			0.757299	30.3419	33.5294	Albian	Early Cretaceous	111.054	27.15	Wagner et al 2008
O'Brien et al., (2017)	DSDP 545			0.744823	29.8484	32.3529	Albian	Early Cretaceous	111.058	27.15	Wagner et al 2008
O'Brien et al., (2017)	DSDP 545			0.759316	30.4209	33.5294	Albian	Early Cretaceous	111.061	27.15	Wagner et al 2008
O'Brien et al., (2017)	DSDP 545			0.767624	30.7442	34.1176	Albian	Early Cretaceous	111.063	27.15	Wagner et al 2008
O'Brien et al., (2017)	DSDP 545			0.782226	31.3039	34.7059	Albian	Early Cretaceous	111.065	27.15	Wagner et al 2008
O'Brien et al., (2017)	DSDP 545			0.781897	31.2914	34.7059	Albian	Early Cretaceous	111.068	27.15	Wagner et al 2008
O'Brien et al., (2017)	DSDP 545			0.772721	30.9408	34.1176	Albian	Early Cretaceous	111.073	27.15	Wagner et al 2008
O'Brien et al., (2017)	DSDP 545			0.774702	31.0168	34.1176	Albian	Early Cretaceous	111.08	27.15	Wagner et al 2008
O'Brien et al., (2017)	DSDP 545			0.778601	31.1659	34.7059	Albian	Early Cretaceous	111.085	27.15	Wagner et al 2008
O'Brien et al., (2017)	DSDP 545			0.777816	31.136	34.7059	Albian	Early Cretaceous	111.092	27.15	Wagner et al 2008
O'Brien et al., (2017)	DSDP 545			0.789978	31.5969	35.2941	Albian	Early Cretaceous	111.095	27.15	Wagner et al 2008
O'Brien et al., (2017)	DSDP 545			0.785558	31.4302	35.2941	Albian	Early Cretaceous	111.102	27.15	Wagner et al 2008
O'Brien et al., (2017)	DSDP 545			0.788868	31.5551	35.2941	Albian	Early Cretaceous	111.11	27.15	Wagner et al 2008
O'Brien et al., (2017)	DSDP 545			0.779729	31.2089	34.7059	Albian	Early Cretaceous	111.113	27.15	Wagner et al 2008
O'Brien et al., (2017)	DSDP 545			0.778697	31.1696	34.6293	Albian	Early Cretaceous	111.113	27.15	Wagner et al 2008
O'Brien et al., (2017)	DSDP 545			0.792792	31.7025	35.2941	Albian	Early Cretaceous	111.118	27.15	Wagner et al 2008
O'Brien et al., (2017)	DSDP 545			0.789865	31.5926	35.2941	Albian	Early Cretaceous	111.126	27.15	Wagner et al 2008
O'Brien et al., (2017)	DSDP 545			0.786	31.4469	35.2941	Albian	Early Cretaceous	111.128	27.15	Wagner et al 2008
O'Brien et al., (2017)	DSDP 545			0.733815	29.4061	31.7647	Albian	Early Cretaceous	111.132	27.15	Wagner et al 2008
O'Brien et al., (2017)	DSDP 545			0.723577	28.9888	31.1765	Albian	Early Cretaceous	111.135	27.15	Wagner et al 2008
O'Brien et al., (2017)	DSDP 545			0.729377	29.2259	31.7647	Albian	Early Cretaceous	111.138	27.15	Wagner et al 2008
O'Brien et al., (2017)	DSDP 545			0.72343	28.9827	31.1765	Albian	Early Cretaceous	111.144	27.15	Wagner et al 2008
O'Brien et al., (2017)	DSDP 545			0.734151	29.4197	31.7647	Albian	Early Cretaceous	111.148	27.15	Wagner et al 2008
O'Brien et al., (2017)	DSDP 545			0.734624	29.4388	31.7647	Albian	Early Cretaceous	111.154	27.15	Wagner et al 2008
O'Brien et al., (2017)	DSDP 545			0.732443	29.3505	31.7647	Albian	Early Cretaceous	111.159	27.15	Wagner et al 2008
O'Brien et al., (2017)	DSDP 545			0.735771	29.4852	32.1042	Albian	Early Cretaceous	111.175	27.15	Hofmann et al 2008
O'Brien et al., (2017)	DSDP 545			0.74674	29.9248	32.7494	Albian	Early Cretaceous	111.19	27.15	Hofmann et al 2008
O'Brien et al., (2017)	DSDP 545			0.75009	30.0577	32.9465	Albian	Early Cretaceous	111.207	27.15	Hofmann et al 2008
O'Brien et al., (2017)	DSDP 545			0.749446	30.0322	32.9086	Albian	Early Cretaceous	111.223	27.15	Hofmann et al 2008
O'Brien et al., (2017)	DSDP 545			0.756644	30.3162	33.332	Albian	Early Cretaceous	111.243	27.15	Hofmann et al 2008
O'Brien et al., (2017)	DSDP 545			0.74388	29.8108	32.5812	Albian	Early Cretaceous	111.254	27.15	Hofmann et al 2008
O'Brien et al., (2017)	DSDP 545			0.728459	29.1885	31.674	Albian	Early Cretaceous	111.269	27.15	Hofmann et al 2008
O'Brien et al., (2017)	DSDP 545			0.726948	29.1268	31.5852	Albian	Early Cretaceous	111.277	27.15	Hofmann et al 2008
O'Brien et al., (2017)	DSDP 545			0.726272	29.0992	31.5454	Albian	Early Cretaceous	111.282	27.15	Hofmann et al 2008
O'Brien et al., (2017)	DSDP 545			0.722389	28.94	31.317	Albian	Early Cretaceous	111.286	27.15	Hofmann et al 2008
O'Brien et al., (2017)	DSDP 545			0.724152	29.0124	31.4207	Albian	Early Cretaceous	111.292	27.15	Hofmann et al 2008
O'Brien et al., (2017)	DSDP 545			0.73119	29.2997	31.8347	Albian	Early Cretaceous	111.306	27.15	Hofmann et al 2008
O'Brien et al., (2017)	DSDP 545			0.734604	29.438	32.0355	Albian	Early Cretaceous	111.318	27.15	Hofmann et al 2008
O'Brien et al., (2017)	DSDP 545			0.731701	29.3204	31.8647	Albian	Early Cretaceous	111.333	27.15	Hofmann et al 2008
O'Brien et al., (2017)	DSDP 545			0.730691	29.2794	31.8054	Albian	Early Cretaceous	111.345	27.15	Hofmann et al 2008
O'Brien et al., (2017)	DSDP 545			0.739875	29.6504	32.3456	Albian	Early Cretaceous	111.361	27.15	Hofmann et al 2008
O'Brien et al., (2017)	DSDP 545			0.740402	29.6716	32.3766	Albian	Early Cretaceous	111.371	27.15	Hofmann et al 2008
O'Brien et al., (2017)	DSDP 545			0.750859	30.0882	32.9917	Albian	Early Cretaceous	111.387	27.15	Hofmann et al 2008
O'Brien et al., (2017)	DSDP 545			0.736942	29.5324	32.1731	Albian	Early Cretaceous	111.403	27.15	Hofmann et al 2008
O'Brien et al., (2017)	DSDP 545			0.71994	28.8391	31.1729	Albian	Early Cretaceous	111.418	27.15	Hofmann et al 2008
O'Brien et al., (2017)	DSDP 545			0.720456	28.8604	31.2033	Albian	Early Cretaceous	111.435	27.15	Hofmann et al 2008
O'Brien et al., (2017)	DSDP 545			0.721051	28.8849	31.2383	Albian	Early Cretaceous	111.449	27.15	Hofmann et al 2008
O'Brien et al., (2017)	DSDP 545			0.735714	29.4829	32.1008	Albian	Early Cretaceous	111.46	27.15	Hofmann et al 2008
O'Brien et al., (2017)	DSDP 545			0.742265	29.7462	32.4706	Albian	Early Cretaceous	111.467	27.15	McAnena et al 2013
O'Brien et al., (2017)	DSDP 545			0.742866	29.7703	32.5294	Albian	Early Cretaceous	111.767	27.15	McAnena et al 2013
O'Brien et al., (2017)	DSDP 545			0.75118	30.1009	33	Albian	Early Cretaceous	111.847	27.15	McAnena et al 2013
O'Brien et al., (2017)	DSDP 545			0.779001	31.1812	34.5294	Albian	Early Cretaceous	112.199	27.15	McAnena et al 2013
O'Brien et al., (2017)	DSDP 545			0.78	31.2193	34.7059	Albian	Early Cretaceous	112.2	27.15	McAnena et al 2013
O'Brien et al., (2017)	DSDP 545			0.756769	30.3211	33.2353	Albian	Early Cretaceous	112.293	27.15	McAnena et al 2013
O'Brien et al., (2017)	DSDP 545			0.763862	30.5982	33.7647	Albian	Early Cretaceous	112.59	27.15	McAnena et al 2013
O'Brien et al., (2017)	DSDP 545			0.720395	28.8578	31.1765	Aptian	Early Cretaceous	113.509	27.15	McAnena et al 2013
O'Brien et al., (2017)	DSDP 545			0.717637	28.7439	31.0588	Aptian	Early Cretaceous	113.747	27.15	McAnena et al 2013
O'Brien et al., (2017)	DSDP 545			0.70087	28.0416	30.0588	Aptian	Early Cretaceous	113.943	27.15	McAnena et al 2013
O'Brien et al., (2017)	DSDP 545			0.674844	26.9175	28.5202	Aptian	Early Cretaceous	113.963	27.15	McAnena et al 2013
O'Brien et al., (2017)	DSDP 545			0.716337	28.69	30.9412	Aptian	Early Cretaceous	114.023	27.15	McAnena et al 2013
O'Brien et al., (2017)	DSDP 545			0.693553	27.7298	29.6471	Aptian	Early Cretaceous	114.285	27.15	McAnena et al 2013
O'Brien et al., (2017)	DSDP 545			0.71869	28.7875	30.1765	Aptian	Early Cretaceous	114.488	27.15	McAnena et al 2013
O'Brien et al., (2017)	DSDP 545			0.713173	28.5585	30.7749	Aptian	Early Cretaceous	114.488	27.15	McAnena et al 2013
O'Brien et al., (2017)	DSDP 545			0.71902	28.8011	31.1176	Aptian	Early Cretaceous	114.497	27.15	McAnena et al 2013
O'Brien et al., (2017)	DSDP 545			0.693531	27.7289	29.5294	Aptian	Early Cretaceous	114.558	27.15	McAnena et al 2013
O'Brien et al., (2017)	DSDP 545			0.69068	27.6065	29.4706	Aptian	Early Cretaceous	114.6	27.15	McAnena et al 2013
O'Brien et al., (2017)	DSDP 545			0.723928	29.0031	31.1176	Aptian	Early Cretaceous	114.679	27.15	McAnena et al 2013
O'Brien et al., (2017)	DSDP 545			0.692795	27.6974	29.5294	Aptian	Early Cretaceous	114.817	27.15	McAnena et al 2013
O'Brien et al., (2017)	DSDP 545			0.718518	28.7803	30.9412	Aptian	Early Cretaceous	114.874	27.15	McAnena et al 2013
O'Brien et al., (2017)	DSDP 545			0.721399	28.8992	31.2353	Aptian	Early Cretaceous	114.88	26.87	McAnena et al 2013
O'Brien et al., (2017)	DSDP 545			0.807376	32.244	36.3529	Aptian	Early Cretaceous	115.043	26.87	McAnena et al 2013
O'Brien et al., (2017)	DSDP 545			0.81468	32.5115	36.5294	Aptian	Early Cretaceous	115.044	26.87	McAnena et al 2013
O'Brien et al., (2017)	DSDP 545			0.779483	31.1996	34.6471	Aptian	Early Cretaceous	115.045	26.87	McAnena et al 2013
O'Brien et al., (2017)	DSDP 545			0.796302	31.8337	36.1176	Aptian	Early Cretaceous	115.048	26.87	McAnena et al 2013
O'Brien et al., (2017)	DSDP 545			0.690394	27.5942	29.4118	Aptian	Early Cretaceous	115.05	26.87	McAnena et al 2013
O'Brien et al., (2017)	DSDP 545			0.716214	28.6849	30.9412	Aptian	Early Cretaceous	115.155	26.87	McAnena et al 2013
O'Brien et al., (2017)	DSDP 545			0.70129	28.0594	30.1176	Aptian	Early Cretaceous	115.224	26.87	McAnena et al 2013
O'Brien et al., (2017)	DSDP 545			0.712232	28.5193	30.6471	Aptian	Early Cretaceous	115.3	26.87	McAnena et al 2013
O'Brien et al., (2017)	DSDP 545			0.712484	28.5298	30.7059	Aptian	Early Cretaceous	115.385	26.87	McAnena et al 2013
O'Brien et al., (2017)	DSDP 545			0.736231	29.5038	32.4118	Aptian	Early Cretaceous	115.431	26.87	McAnena et al 2013
O'Brien et al., (2017)	DSDP 545			0.744613	29.84	32.7059	Aptian	Early Cretaceous	115.667	26.87	McAnena et al 2013
O'Brien et al., (2017)	DSDP 545			0.732438	29.3503	31.8824	Aptian	Early Cretaceous	115.926	26.87	McAnena et al 2013
O'Brien et al., (2017)	DSDP 545			0.765219	30.651	33.8235	Aptian	Early Cretaceous	115.989	26.87	McAnena et al 2013
O'Brien et al., (2017)	DSDP 545			0.720786	28.8739	31.1765	Aptian	Early Cretaceous	116.015	26.87	McAnena et al 2013
O'Brien et al., (2017)	DSDP 545			0.731348	29.3061	31.8235	Aptian	Early Cretaceous	116.068	26.87	McAnena et al 2013
O'Brien et al., (2017)	DSDP 545			0.731755	29.3226	32.4706	Aptian	Early Cretaceous	116.121	26.87	McAnena et al 2013
O'Brien et al., (2017)	DSDP 545			0.74075	29.6855	32.2941	Aptian	Early Cretaceous	116.172	26.87	McAnena et al 2013
O'Brien et al., (2017)	DSDP 545			0.716751	28.7072	30.8824	Aptian	Early Cretaceous	116.232	26.87	McAnena et al 2013
O'Brien et al., (2017)	DSDP 545			0.74852	29.9955	32.8824	Aptian	Early Cretaceous	116.267	26.87	McAnena et al 2013
O'Brien et al., (2017)	DSDP 545			0.68493	27.3582	29.1176	Aptian	Early Cretaceous	116.283	26.87	McAnena et al 2013
O'Brien et al., (2017)	DSDP 545			0.748952	30.0127	32.7647	Aptian	Early Cretaceous	116.291	26.87	McAnena et al 2013
O'Brien et al., (2017)	DSDP 545			0.75498	30.2508	33	Aptian	Early Cretaceous	116.319	26.87	McAnena et al 2013
O'Brien et al., (2017)	DSDP 545			0.717442	28.7358	31.2353	Aptian	Early Cretaceous	116.335	26.87	McAnena et al 2013
O'Brien et al., (2017)	DSDP 545			0.766016	30.6818	33.8235	Aptian	Early Cretaceous	116.347	26.87	McAnena et al 2013
O'Brien et al., (2017)	DSDP 545			0.736964	29.5333	32.4118	Aptian	Early Cretaceous	116.432	26.87	McAnena et al 2013
O'Brien et al., (2017)	DSDP 545			0.77544	31.0451	34.3529	Aptian	Early Cretaceous	116.524	26.87	McAnena et al 2013
O'Brien et al., (2017)	DSDP 545			0.748124	29.9798	32.9412	Aptian	Early Cretaceous	116.597	26.87	McAnena et al 2013
O'Brien et al., (2017)	DSDP 545			0.795943	31.8203	35.6471	Aptian	Early Cretaceous	116.605	26.87	McAnena et al 2013
O'Brien et al., (2017)	DSDP 545			0.802413	32.0608	36	Aptian	Early Cretaceous	116.612	26.87	McAnena et al 2013
O'Brien et al., (2017)	DSDP 545			0.804415	32.1348	36.1176	Aptian	Early Cretaceous	116.621	26.87	McAnena et al 2013
O'Brien et al., (2017)	DSDP 545			0.762245	30.5353	33.7059	Aptian	Early Cretaceous	116.812	26.87	McAnena et al 2013
O'Brien et al., (2017)	DSDP 545			0.759957	30.446	33.5294	Aptian	Early Cretaceous	116.961	26.87	McAnena et al 2013
O'Brien et al., (2017)	DSDP 545			0.76318	30.5717	33.7059	Aptian	Early Cretaceous	117.134	26.87	McAnena et al 2013
O'Brien et al., (2017)	DSDP 545			0.761209	30.4949	33.5882	Aptian	Early Cretaceous	117.196	26.87	McAnena et al 2013
O'Brien et al., (2017)	DSDP 545			0.776581	31.0888	34.5294	Aptian	Early Cretaceous	117.255	26.87	McAnena et al 2013
O'Brien et al., (2017)	DSDP 545			0.764974	30.6414	33.9412	Aptian	Early Cretaceous	117.298	26.87	McAnena et al 2013
O'Brien et al., (2017)	DSDP 545			0.734072	29.4165	32	Aptian	Early Cretaceous	117.349	26.87	McAnena et al 2013
O'Brien et al., (2017)	DSDP 545			0.760758	30.4773	33.7059	Aptian	Early Cretaceous	117.387	26.87	McAnena et al 2013
O'Brien et al., (2017)	DSDP 545			0.767718	30.7478	34	Aptian	Early Cretaceous	117.511	26.87	McAnena et al 2013
O'Brien et al., (2017)	DSDP 545			0.74426	29.826	32.5294	Aptian	Early Cretaceous	117.612	26.87	McAnena et al 2013
O'Brien et al., (2017)	DSDP 545			0.76258	30.5483	33.7059	Aptian	Early Cretaceous	117.614	26.87	McAnena et al 2013
O'Brien et al., (2017)	DSDP 545			0.738466	29.5938	32.2353	Aptian	Early Cretaceous	117.682	26.87	McAnena et al 2013
O'Brien et al., (2017)	DSDP 545			0.795467	31.8025	35.2941	Aptian	Early Cretaceous	117.701	26.87	McAnena et al 2013
O'Brien et al., (2017)	DSDP 545			0.798347	31.9099	35.7647	Aptian	Early Cretaceous	117.727	26.87	McAnena et al 2013
O'Brien et al., (2017)	DSDP 545			0.802843	32.0767	36.0588	Aptian	Early Cretaceous	117.751	26.87	McAnena et al 2013
O'Brien et al., (2017)	DSDP 545			0.783693	31.3596	34.9412	Aptian	Early Cretaceous	117.796	26.87	McAnena et al 2013
O'Brien et al., (2017)	DSDP 545			0.730056	29.2536	31.7059	Aptian	Early Cretaceous	117.856	26.87	McAnena et al 2013
O'Brien et al., (2017)	DSDP 545			0.752176	30.1403	32.6471	Aptian	Early Cretaceous	117.941	26.87	McAnena et al 2013
O'Brien et al., (2017)	DSDP 545			0.753423	30.1894	32.8235	Aptian	Early Cretaceous	117.95	26.87	McAnena et al 2013
O'Brien et al., (2017)	DSDP 545			0.760871	30.4817	33.5882	Aptian	Early Cretaceous	118.036	26.87	McAnena et al 2013
O'Brien et al., (2017)	DSDP 545			0.743454	29.7938	31.4118	Aptian	Early Cretaceous	118.168	26.87	McAnena et al 2013
O'Brien et al., (2017)	DSDP 545			0.76269	30.5526	33.6471	Aptian	Early Cretaceous	118.252	26.87	McAnena et al 2013
O'Brien et al., (2017)	DSDP 545			0.755112	30.256	33.2353	Aptian	Early Cretaceous	118.343	26.87	McAnena et al 2013
O'Brien et al., (2017)	DSDP 545			0.739492	29.635	32.4118	Aptian	Early Cretaceous	118.474	26.87	McAnena et al 2013
O'Brien et al., (2017)	DSDP 545			0.739367	29.63	32.2941	Aptian	Early Cretaceous	118.603	26.87	McAnena et al 2013
O'Brien et al., (2017)	DSDP 545			0.722526	28.9456	31.2941	Aptian	Early Cretaceous	118.687	26.87	McAnena et al 2013
O'Brien et al., (2017)	DSDP 545			0.756283	30.302	33.4118	Aptian	Early Cretaceous	118.707	26.87	McAnena et al 2013
O'Brien et al., (2017)	DSDP 545			0.744808	29.8478	32.7647	Aptian	Early Cretaceous	118.725	26.87	McAnena et al 2013
O'Brien et al., (2017)	DSDP 545			0.758325	30.3821	33.4118	Aptian	Early Cretaceous	118.768	26.87	McAnena et al 2013
O'Brien et al., (2017)	DSDP 545			0.750437	30.0715	32.9412	Aptian	Early Cretaceous	118.92	26.87	McAnena et al 2013
O'Brien et al., (2017)	DSDP 545			0.772456	30.9306	34.2353	Aptian	Early Cretaceous	119.029	26.87	McAnena et al 2013
O'Brien et al., (2017)	DSDP 545			0.793559	31.7312	35.3529	Aptian	Early Cretaceous	119.148	26.87	McAnena et al 2013
O'Brien et al., (2017)	DSDP 545			0.793223	31.7186	35.4706	Aptian	Early Cretaceous	119.441	26.87	McAnena et al 2013
O'Brien et al., (2017)	DSDP 545			0.765107	30.6466	33.8235	Aptian	Early Cretaceous	119.614	26.87	McAnena et al 2013
O'Brien et al., (2017)	DSDP 545			0.808371	32.2806	36.3529	Aptian	Early Cretaceous	119.844	26.87	McAnena et al 2013
O'Brien et al., (2017)	DSDP 545			0.794703	31.774	35.5882	Aptian	Early Cretaceous	120.045	26.87	McAnena et al 2013
O'Brien et al., (2017)	DSDP 545			0.809846	32.3347	36.4706	Aptian	Early Cretaceous	120.36	26.87	McAnena et al 2013
O'Brien et al., (2017)	DSDP 545			0.775182	31.0352	34.4118	Aptian	Early Cretaceous	120.644	26.87	McAnena et al 2013
O'Brien et al., (2017)	DSDP 545			0.783301	31.3447	34.8235	Aptian	Early Cretaceous	120.953	26.87	McAnena et al 2013
O'Brien et al., (2017)	DSDP 545			0.803457	32.0994	36.0588	Aptian	Early Cretaceous	121.211	26.87	McAnena et al 2013
O'Brien et al., (2017)	DSDP 545			0.805904	32.1898	36.2353	Aptian	Early Cretaceous	121.487	26.87	McAnena et al 2013
O'Brien et al., (2017)	DSDP 545			0.788794	31.5523	35.2353	Aptian	Early Cretaceous	121.777	26.87	McAnena et al 2013
O'Brien et al., (2017)	DSDP 545			0.798118	31.9014	36	Aptian	Early Cretaceous	122.073	26.87	McAnena et al 2013
O'Brien et al., (2017)	DSDP 545			0.787943	31.5202	35.1731	Aptian	Early Cretaceous	122.207	26.87	McAnena et al 2014
O'Brien et al., (2017)	DSDP 545			0.811717	32.4033	36.5882	Aptian	Early Cretaceous	122.363	26.87	McAnena et al 2013
O'Brien et al., (2017)	DSDP 545			0.77663	31.0907	34.5294	Aptian	Early Cretaceous	122.5	26.87	McAnena et al 2013
O'Brien et al., (2017)	DSDP 545			0.798502	31.9157	36	Aptian	Early Cretaceous	122.541	26.87	McAnena et al 2013
O'Brien et al., (2017)	DSDP 545			0.798932	31.9317	35.8235	Aptian	Early Cretaceous	122.673	26.87	McAnena et al 2013
O'Brien et al., (2017)	DSDP 545			0.800117	31.9757	35.8824	Aptian	Early Cretaceous	122.724	26.87	McAnena et al 2013
O'Brien et al., (2017)	ODP 1276			0.91	35.7984	42.3529	Turonian	early Late Cretaceous	93.6362	36.05	Sinninghe Damste et al 2010
O'Brien et al., (2017)	ODP 1276			0.934	36.5717	43.7647	Turonian	early Late Cretaceous	93.667	36.05	Sinninghe Damste et al 2010
O'Brien et al., (2017)	ODP 1276			0.952	37.1388	44.8235	Turonian	early Late Cretaceous	93.681	36.05	Sinninghe Damste et al 2010
O'Brien et al., (2017)	ODP 1276			0.909	35.7658	42.2941	Turonian	early Late Cretaceous	93.8321	36.05	Sinninghe Damste et al 2010
O'Brien et al., (2017)	ODP 1276			0.913	35.8962	42.5294	Turonian	early Late Cretaceous	93.8364	36.05	Sinninghe Damste et al 2010
O'Brien et al., (2017)	ODP 1276			0.952	37.1388	44.8235	Turonian	early Late Cretaceous	93.8782	36.05	Sinninghe Damste et al 2010
O'Brien et al., (2017)	ODP 1276			0.893	35.2382	41.3529	Turonian	early Late Cretaceous	93.8898	36.05	Sinninghe Damste et al 2010
O'Brien et al., (2017)	ODP 1276			0.942	36.8251	44.2353	Turonian	early Late Cretaceous	93.8919	36.05	Sinninghe Damste et al 2010
O'Brien et al., (2017)	ODP 1276			0.959	37.3564	45.2353	Turonian	early Late Cretaceous	93.894	36.05	Sinninghe Damste et al 2010
O'Brien et al., (2017)	ODP 1276			0.943	36.8566	44.2941	Turonian	early Late Cretaceous	93.9	36.05	Sinninghe Damste et al 2010
O'Brien et al., (2017)	ODP 1276			0.949	37.045	44.6471	Cenomanian	early Late Cretaceous	93.9157	36.05	Sinninghe Damste et al 2010
O'Brien et al., (2017)	ODP 1276			0.94	36.7619	44.1176	Cenomanian	early Late Cretaceous	93.9328	36.05	Sinninghe Damste et al 2010
O'Brien et al., (2017)	ODP 1276			0.944	36.8881	44.3529	Cenomanian	early Late Cretaceous	93.9513	36.05	Sinninghe Damste et al 2010
O'Brien et al., (2017)	ODP 1276			0.929	36.4123	43.4706	Cenomanian	early Late Cretaceous	93.9627	36.05	Sinninghe Damste et al 2010
O'Brien et al., (2017)	ODP 1276			0.938	36.6987	44	Cenomanian	early Late Cretaceous	93.9798	36.05	Sinninghe Damste et al 2010
O'Brien et al., (2017)	ODP 1276			0.943	36.8566	44.2941	Cenomanian	early Late Cretaceous	93.9897	36.05	Sinninghe Damste et al 2010
O'Brien et al., (2017)	ODP 1276			0.963	37.48	45.4706	Cenomanian	early Late Cretaceous	94.0068	36.05	Sinninghe Damste et al 2010
O'Brien et al., (2017)	ODP 1276			0.949	37.045	44.6471	Cenomanian	early Late Cretaceous	94.0211	36.05	Sinninghe Damste et al 2010
O'Brien et al., (2017)	ODP 1276			0.949	37.045	44.6471	Cenomanian	early Late Cretaceous	94.0339	36.05	Sinninghe Damste et al 2010
O'Brien et al., (2017)	ODP 1276			0.937	36.667	43.9412	Cenomanian	early Late Cretaceous	94.0538	36.05	Sinninghe Damste et al 2010
O'Brien et al., (2017)	ODP 1276			0.895	35.3047	41.4706	Cenomanian	early Late Cretaceous	94.0624	36.05	Sinninghe Damste et al 2010
O'Brien et al., (2017)	ODP 1276			0.836	33.2789	38	Cenomanian	early Late Cretaceous	94.0695	36.05	Sinninghe Damste et al 2010
O'Brien et al., (2017)	ODP 1276			0.88	34.8026	40.5882	Cenomanian	early Late Cretaceous	94.0795	36.05	Sinninghe Damste et al 2010
O'Brien et al., (2017)	ODP 1276			0.861	34.1542	39.4706	Cenomanian	early Late Cretaceous	94.0866	36.05	Sinninghe Damste et al 2010
O'Brien et al., (2017)	ODP 1276			0.881	34.8364	40.6471	Cenomanian	early Late Cretaceous	94.0937	36.05	Sinninghe Damste et al 2010
O'Brien et al., (2017)	ODP 1276			0.882	34.8701	40.7059	Cenomanian	early Late Cretaceous	94.1009	36.05	Sinninghe Damste et al 2010
O'Brien et al., (2017)	ODP 1276			0.884	34.9373	40.8235	Cenomanian	early Late Cretaceous	94.1108	36.05	Sinninghe Damste et al 2010
O'Brien et al., (2017)	ODP 1276			0.909	35.7658	42.2941	Cenomanian	early Late Cretaceous	94.1194	36.05	Sinninghe Damste et al 2010
O'Brien et al., (2017)	ODP 1276			0.889	35.1049	41.1176	Cenomanian	early Late Cretaceous	94.1265	36.05	Sinninghe Damste et al 2010
O'Brien et al., (2017)	ODP 1276			0.917	36.0261	42.7647	Cenomanian	early Late Cretaceous	94.135	36.05	Sinninghe Damste et al 2010
O'Brien et al., (2017)	ODP 1276			0.815	32.5232	36.7647	Cenomanian	early Late Cretaceous	94.1422	36.05	Sinninghe Damste et al 2010
O'Brien et al., (2017)	ODP 1276			0.743	29.7756	32.5294	Cenomanian	early Late Cretaceous	94.1621	36.05	Sinninghe Damste et al 2010
O'Brien et al., (2017)	ODP 1276			0.779	31.1812	34.6471	Cenomanian	early Late Cretaceous	94.1692	36.05	Sinninghe Damste et al 2010
O'Brien et al., (2017)	ODP 1276			0.867	34.3605	39.8235	Cenomanian	early Late Cretaceous	94.1778	36.05	Sinninghe Damste et al 2010
O'Brien et al., (2017)	ODP 1276			0.788	31.5224	35.1765	Cenomanian	early Late Cretaceous	94.1835	36.05	Sinninghe Damste et al 2010
O'Brien et al., (2017)	ODP 1276			0.809	32.3037	36.4118	Cenomanian	early Late Cretaceous	94.1877	36.05	Sinninghe Damste et al 2010
O'Brien et al., (2017)	ODP 1276			0.9	35.4702	41.7647	Cenomanian	early Late Cretaceous	94.1977	36.05	Sinninghe Damste et al 2010
O'Brien et al., (2017)	ODP 1276			0.86	34.1197	39.4118	Cenomanian	early Late Cretaceous	94.2048	36.05	Sinninghe Damste et al 2010
O'Brien et al., (2017)	ODP 1276			0.838	33.3499	38.1176	Cenomanian	early Late Cretaceous	94.2162	36.05	Sinninghe Damste et al 2010
O'Brien et al., (2017)	ODP 1276			0.931	36.4762	43.5882	Cenomanian	early Late Cretaceous	94.2746	36.05	Sinninghe Damste et al 2010
O'Brien et al., (2017)	ODP 1276			0.899	35.4372	41.7059	Cenomanian	early Late Cretaceous	94.2917	36.05	Sinninghe Damste et al 2010
O'Brien et al., (2017)	ODP 1276			0.936	36.6353	43.8824	Cenomanian	early Late Cretaceous	94.3231	36.05	Sinninghe Damste et al 2010
O'Brien et al., (2017)	ODP 1276			0.932	36.508	43.6471	Cenomanian	early Late Cretaceous	94.3444	36.05	Sinninghe Damste et al 2010
O'Brien et al., (2017)	ODP 1276			0.951	37.1075	44.7647	Cenomanian	early Late Cretaceous	94.3516	36.05	Sinninghe Damste et al 2010
O'Brien et al., (2017)	ODP 1276			0.922	36.1876	43.0588	Cenomanian	early Late Cretaceous	94.3744	36.05	Sinninghe Damste et al 2010
O'Brien et al., (2017)	ODP 1276			0.923	36.2198	43.1176	Cenomanian	early Late Cretaceous	94.4	36.05	Sinninghe Damste et al 2010
O'Brien et al., (2017)	ODP 1276			0.955	37.2322	45	Cenomanian	early Late Cretaceous	94.4012	36.05	Sinninghe Damste et al 2010
O'Brien et al., (2017)	ODP 1276			0.928	36.3803	43.4118	Cenomanian	early Late Cretaceous	94.4159	36.05	Sinninghe Damste et al 2010
O'Brien et al., (2017)	ODP 1276			0.921	36.1554	43	Cenomanian	early Late Cretaceous	94.4374	36.05	Sinninghe Damste et al 2010
O'Brien et al., (2017)	ODP 1276			0.889	35.1049	41.1176	Cenomanian	early Late Cretaceous	94.4472	36.05	Sinninghe Damste et al 2010
O'Brien et al., (2017)	Alstätte 1 section			0.76	30.4476	33.5294	Aptian	Early Cretaceous	119.505	41.11	Mutterlose et al 2014
O'Brien et al., (2017)	Alstätte 1 section			0.79	31.5977	35.2941	Aptian	Early Cretaceous	121.527	41.11	Mutterlose et al 2014
O'Brien et al., (2017)	Alstätte 1 section			0.8	31.9714	35.8824	Aptian	Early Cretaceous	122.741	41.11	Mutterlose et al 2014
O'Brien et al., (2017)	Alstätte 1 section			0.8	31.9714	35.8824	Aptian	Early Cretaceous	123.55	41.11	Mutterlose et al 2014
O'Brien et al., (2017)	Alstätte 1 section			0.79	31.5977	35.2941	Barremian	Early Cretaceous	125.33	37.18	Mutterlose et al 2014
O'Brien et al., (2017)	Alstätte 1 section			0.82	32.7049	37.0588	Barremian	Early Cretaceous	125.572	37.18	Mutterlose et al 2014
O'Brien et al., (2017)	Alstätte 1 section			0.8	31.9714	35.8824	Barremian	Early Cretaceous	125.896	37.18	Mutterlose et al 2014
O'Brien et al., (2017)	Alstätte 1 section			0.82	32.7049	37.0588	Barremian	Early Cretaceous	126.867	37.18	Mutterlose et al 2014
O'Brien et al., (2017)	Alstätte 1 section			0.78	31.2193	34.7059	Barremian	Early Cretaceous	127.109	37.18	Mutterlose et al 2014
O'Brien et al., (2017)	Alstätte 1 section			0.71	28.4261	30.5882	Barremian	Early Cretaceous	127.271	37.18	Mutterlose et al 2014
O'Brien et al., (2017)	Alstätte 1 section			0.73	29.2513	31.7647	Barremian	Early Cretaceous	128.485	37.18	Mutterlose et al 2014
O'Brien et al., (2017)	Alstätte 1 section			0.68	27.1436	28.8235	Barremian	Early Cretaceous	129.577	37.18	Mutterlose et al 2014
O'Brien et al., (2017)	A39 section			0.87	34.4631	40	Barremian	Early Cretaceous	125.956	34.59	Mutterlose et al 2010
O'Brien et al., (2017)	A39 section			0.86	34.1197	39.4118	Barremian	Early Cretaceous	125.961	34.59	Mutterlose et al 2010
O'Brien et al., (2017)	A39 section			0.86	34.1197	39.4118	Barremian	Early Cretaceous	125.965	34.59	Mutterlose et al 2010
O'Brien et al., (2017)	A39 section			0.85	33.7723	38.8235	Barremian	Early Cretaceous	125.974	34.59	Mutterlose et al 2010
O'Brien et al., (2017)	A39 section			0.79	31.5977	35.2941	Barremian	Early Cretaceous	126.08	34.59	Mutterlose et al 2010
O'Brien et al., (2017)	A39 section			0.83	33.0649	37.6471	Barremian	Early Cretaceous	126.102	34.59	Mutterlose et al 2010
O'Brien et al., (2017)	A39 section			0.7	28.0047	30	Barremian	Early Cretaceous	126.55	34.59	Mutterlose et al 2010
O'Brien et al., (2017)	A39 section			0.75	30.0542	32.9412	Barremian	Early Cretaceous	126.74	34.59	Mutterlose et al 2010
O'Brien et al., (2017)	A39 section			0.73	29.2513	31.7647	Barremian	Early Cretaceous	126.77	34.59	Mutterlose et al 2010
O'Brien et al., (2017)	A39 section			0.73	29.2513	31.7647	Barremian	Early Cretaceous	126.828	34.59	Mutterlose et al 2010
O'Brien et al., (2017)	A39 section			0.74	29.6554	32.3529	Barremian	Early Cretaceous	126.973	34.59	Mutterlose et al 2010
O'Brien et al., (2017)	A39 section			0.7	28.0047	30	Barremian	Early Cretaceous	127.202	34.59	Mutterlose et al 2010
O'Brien et al., (2017)	A39 section			0.7	28.0047	30	Barremian	Early Cretaceous	127.272	34.59	Mutterlose et al 2010
O'Brien et al., (2017)	A39 section			0.75	30.0542	32.9412	Barremian	Early Cretaceous	127.483	34.59	Mutterlose et al 2010
O'Brien et al., (2017)	A39 section			0.66	26.2568	27.6471	Barremian	Early Cretaceous	127.906	34.59	Mutterlose et al 2010
O'Brien et al., (2017)	A39 section			0.71	28.4261	30.5882	Barremian	Early Cretaceous	128.187	34.59	Mutterlose et al 2010
O'Brien et al., (2017)	A39 section			0.7	28.0047	30	Barremian	Early Cretaceous	128.434	34.59	Mutterlose et al 2010
O'Brien et al., (2017)	A39 section			0.71	28.4261	30.5882	Barremian	Early Cretaceous	128.482	34.59	Mutterlose et al 2010
O'Brien et al., (2017)	A39 section			0.7	28.0047	30	Barremian	Early Cretaceous	128.614	34.59	Mutterlose et al 2010
O'Brien et al., (2017)	A39 section			0.66	26.2568	27.6471	Barremian	Early Cretaceous	129.116	34.59	Mutterlose et al 2010
O'Brien et al., (2017)	A39 section			0.68	27.1436	28.8235	Barremian	Early Cretaceous	129.16	34.59	Mutterlose et al 2010
O'Brien et al., (2017)	A39 section			0.69	27.5773	29.4118	Barremian	Early Cretaceous	129.168	34.59	Mutterlose et al 2010
O'Brien et al., (2017)	A39 section			0.7	28.0047	30	Barremian	Early Cretaceous	129.177	34.59	Mutterlose et al 2010
O'Brien et al., (2017)	A39 section			0.7	28.0047	30	Barremian	Early Cretaceous	129.3	34.59	Mutterlose et al 2010
O'Brien et al., (2017)	A39 section			0.68	27.1436	28.8235	Hauterivian	Early Cretaceous	129.516	34.59	Mutterlose et al 2010
O'Brien et al., (2017)	A39 section			0.72	28.8415	31.1765	Hauterivian	Early Cretaceous	129.67	34.59	Mutterlose et al 2010
O'Brien et al., (2017)	A39 section			0.65	25.8033	27.0588	Hauterivian	Early Cretaceous	129.736	34.59	Mutterlose et al 2010
O'Brien et al., (2017)	A39 section			0.68	27.1436	28.8235	Hauterivian	Early Cretaceous	129.767	34.59	Mutterlose et al 2010
O'Brien et al., (2017)	A39 section			0.67	26.7035	28.2353	Hauterivian	Early Cretaceous	129.824	34.59	Mutterlose et al 2010
O'Brien et al., (2017)	A39 section			0.66	26.2568	27.6471	Hauterivian	Early Cretaceous	130.022	34.59	Mutterlose et al 2010
O'Brien et al., (2017)	Gott section			0.77	30.836	34.1176	Barremian	Early Cretaceous	128.666	37.33	Mutterlose et al 2010/Mutterlose et al 2014
O'Brien et al., (2017)	Gott section			0.73	29.2513	31.7647	Barremian	Early Cretaceous	128.677	37.33	Mutterlose et al 2010/Mutterlose et al 2014
O'Brien et al., (2017)	Gott section			0.73	29.2513	31.7647	Barremian	Early Cretaceous	128.951	37.33	Mutterlose et al 2010/Mutterlose et al 2014
O'Brien et al., (2017)	Gott section			0.71	28.4261	30.5882	Hauterivian	Early Cretaceous	129.43	37.33	Mutterlose et al 2010/Mutterlose et al 2014
O'Brien et al., (2017)	Gott section			0.69	27.5773	29.4118	Hauterivian	Early Cretaceous	129.451	37.33	Mutterlose et al 2010/Mutterlose et al 2014
O'Brien et al., (2017)	Gott section			0.68	27.1436	28.8235	Hauterivian	Early Cretaceous	129.461	37.33	Mutterlose et al 2010/Mutterlose et al 2014
O'Brien et al., (2017)	Gott section			0.68	27.1436	28.8235	Hauterivian	Early Cretaceous	129.47	37.33	Mutterlose et al 2010/Mutterlose et al 2014
O'Brien et al., (2017)	Gott section			0.69	27.5773	29.4118	Hauterivian	Early Cretaceous	129.489	37.33	Mutterlose et al 2010/Mutterlose et al 2014
O'Brien et al., (2017)	Gott section			0.68	27.1436	28.8235	Hauterivian	Early Cretaceous	129.499	37.33	Mutterlose et al 2010/Mutterlose et al 2014
O'Brien et al., (2017)	Gott section			0.73	29.2513	31.7647	Hauterivian	Early Cretaceous	129.508	37.33	Mutterlose et al 2010/Mutterlose et al 2014
O'Brien et al., (2017)	Gott section			0.71	28.4261	30.5882	Hauterivian	Early Cretaceous	129.537	37.33	Mutterlose et al 2010/Mutterlose et al 2014
O'Brien et al., (2017)	Gott section			0.68	27.1436	28.8235	Hauterivian	Early Cretaceous	129.547	37.33	Mutterlose et al 2010/Mutterlose et al 2014
O'Brien et al., (2017)	Gott section			0.68	27.1436	28.8235	Hauterivian	Early Cretaceous	129.556	37.33	Mutterlose et al 2010/Mutterlose et al 2014
O'Brien et al., (2017)	Gott section			0.74	29.6554	32.3529	Hauterivian	Early Cretaceous	129.564	37.33	Mutterlose et al 2010/Mutterlose et al 2014
O'Brien et al., (2017)	Mooberg			0.69	27.5773	29.4118	Hauterivian	Early Cretaceous	130.095	37.31	Mutterlose et al 2012
O'Brien et al., (2017)	Mooberg			0.68	27.1436	28.8235	Hauterivian	Early Cretaceous	130.12	37.31	Mutterlose et al 2012
O'Brien et al., (2017)	Mooberg			0.68	27.1436	28.8235	Hauterivian	Early Cretaceous	130.14	37.31	Mutterlose et al 2012
O'Brien et al., (2017)	Mooberg			0.69	27.5773	29.4118	Hauterivian	Early Cretaceous	130.191	37.31	Mutterlose et al 2012
O'Brien et al., (2017)	Mooberg			0.68	27.1436	28.8235	Hauterivian	Early Cretaceous	130.216	37.31	Mutterlose et al 2012
O'Brien et al., (2017)	Mooberg			0.73	29.2513	31.7647	Hauterivian	Early Cretaceous	130.241	37.31	Mutterlose et al 2012
O'Brien et al., (2017)	Mooberg			0.71	28.4261	30.5882	Hauterivian	Early Cretaceous	130.317	37.31	Mutterlose et al 2012
O'Brien et al., (2017)	Mooberg			0.68	27.1436	28.8235	Hauterivian	Early Cretaceous	130.343	37.31	Mutterlose et al 2012
O'Brien et al., (2017)	Mooberg			0.68	27.1436	28.8235	Hauterivian	Early Cretaceous	130.368	37.31	Mutterlose et al 2012
O'Brien et al., (2017)	Mooberg			0.74	29.6554	32.3529	Hauterivian	Early Cretaceous	130.388	37.31	Mutterlose et al 2012
O'Brien et al., (2017)	Mooberg			0.66	26.2568	27.6471	Hauterivian	Early Cretaceous	131.304	37.31	Mutterlose et al 2012
O'Brien et al., (2017)	Mooberg			0.63	24.8749	25.8824	Hauterivian	Early Cretaceous	131.532	37.31	Mutterlose et al 2012
O'Brien et al., (2017)	Mooberg			0.64	25.3427	26.4706	Hauterivian	Early Cretaceous	131.906	37.31	Mutterlose et al 2012
O'Brien et al., (2017)	Mooberg			0.67	26.7035	28.2353	Hauterivian	Early Cretaceous	132.205	37.31	Mutterlose et al 2012
O'Brien et al., (2017)	Mooberg			0.66	26.2568	27.6471	Hauterivian	Early Cretaceous	132.341	37.31	Mutterlose et al 2012
O'Brien et al., (2017)	Mooberg			0.61	23.9166	24.7059	Hauterivian	Early Cretaceous	132.873	37.31	Mutterlose et al 2012
O'Brien et al., (2017)	Mooberg			0.64	25.3427	26.4706	Hauterivian	Early Cretaceous	132.923	37.31	Mutterlose et al 2012
O'Brien et al., (2017)	Mooberg			0.63	24.8749	25.8824	Valanginian	Early Cretaceous	133.429	37.31	Mutterlose et al 2012
O'Brien et al., (2017)	Mooberg			0.65	25.8033	27.0588	Valanginian	Early Cretaceous	133.632	37.31	Mutterlose et al 2012
O'Brien et al., (2017)	Mooberg			0.63	24.8749	25.8824	Valanginian	Early Cretaceous	133.854	37.31	Mutterlose et al 2012
O'Brien et al., (2017)	Mooberg			0.62	24.3996	25.2941	Valanginian	Early Cretaceous	133.96	37.31	Mutterlose et al 2012
O'Brien et al., (2017)	Speeton			0.59	22.9263	23.5294	Valanginian	Early Cretaceous	132.457	39.53	Mutterlose et al 2012
O'Brien et al., (2017)	Speeton			0.57	21.9018	22.3529	Valanginian	Early Cretaceous	132.575	39.53	Mutterlose et al 2012
O'Brien et al., (2017)	Speeton			0.6	23.4255	24.1176	Valanginian	Early Cretaceous	132.832	39.53	Mutterlose et al 2012
O'Brien et al., (2017)	Speeton			0.62	24.3996	25.2941	Valanginian	Early Cretaceous	132.992	39.53	Mutterlose et al 2012
O'Brien et al., (2017)	Shuqualak			0.779793	31.2114	34.6937	Maastrichtian	Latest Cretaceous	66	34.77	Linnert et al 2014
O'Brien et al., (2017)	Shuqualak			0.707496	28.3211	30.4409	Maastrichtian	Latest Cretaceous	67.3	34.77	Linnert et al 2014
O'Brien et al., (2017)	Shuqualak			0.75045	30.072	32.9677	Maastrichtian	Latest Cretaceous	69.18	34.77	Linnert et al 2014
O'Brien et al., (2017)	Shuqualak			0.751	30.0938	33	Maastrichtian	Latest Cretaceous	70.63	34.77	Linnert et al 2014
O'Brien et al., (2017)	Shuqualak			0.722789	28.9564	31.3405	Campanian	Latest Cretaceous	73.89	34.77	Linnert et al 2014
O'Brien et al., (2017)	Shuqualak			0.756282	30.302	33.3107	Campanian	Latest Cretaceous	74.66	34.77	Linnert et al 2014
O'Brien et al., (2017)	Shuqualak			0.761904	30.522	33.6414	Campanian	Latest Cretaceous	74.93	34.77	Linnert et al 2014
O'Brien et al., (2017)	Shuqualak			0.781552	31.2783	34.7971	Campanian	Latest Cretaceous	75.04	34.17	Linnert et al 2014
O'Brien et al., (2017)	Shuqualak			0.792062	31.6751	35.4154	Campanian	Latest Cretaceous	75.26	34.17	Linnert et al 2014
O'Brien et al., (2017)	Shuqualak			0.811211	32.3848	36.5418	Campanian	Latest Cretaceous	75.48	34.17	Linnert et al 2014
O'Brien et al., (2017)	Shuqualak			0.795	31.7851	35.5882	Campanian	Latest Cretaceous	75.75	34.17	Linnert et al 2014
O'Brien et al., (2017)	Shuqualak			0.792949	31.7084	35.4676	Campanian	Latest Cretaceous	75.91	34.17	Linnert et al 2014
O'Brien et al., (2017)	Shuqualak			0.777794	31.1351	34.5761	Campanian	Latest Cretaceous	76.13	34.17	Linnert et al 2014
O'Brien et al., (2017)	Shuqualak			0.78261	31.3185	34.8594	Campanian	Latest Cretaceous	76.35	34.17	Linnert et al 2014
O'Brien et al., (2017)	Shuqualak			0.761514	30.5068	33.6185	Campanian	Latest Cretaceous	76.46	34.17	Linnert et al 2014
O'Brien et al., (2017)	Shuqualak			0.778867	31.1761	34.6392	Campanian	Latest Cretaceous	76.68	34.17	Linnert et al 2014
O'Brien et al., (2017)	Shuqualak			0.775851	31.0608	34.4618	Campanian	Latest Cretaceous	76.95	34.17	Linnert et al 2014
O'Brien et al., (2017)	Shuqualak			0.795082	31.7882	35.593	Campanian	Latest Cretaceous	77.12	34.17	Linnert et al 2014
O'Brien et al., (2017)	Shuqualak			0.793	31.7103	35.4706	Campanian	Latest Cretaceous	77.45	34.17	Linnert et al 2014
O'Brien et al., (2017)	Shuqualak			0.790865	31.6302	35.345	Campanian	Latest Cretaceous	77.55	34.17	Linnert et al 2014
O'Brien et al., (2017)	Shuqualak			0.781833	31.289	34.8137	Campanian	Latest Cretaceous	77.72	34.17	Linnert et al 2014
O'Brien et al., (2017)	Shuqualak			0.791799	31.6652	35.3999	Campanian	Latest Cretaceous	77.99	34.17	Linnert et al 2014
O'Brien et al., (2017)	Shuqualak			0.792587	31.6948	35.4463	Campanian	Latest Cretaceous	78.21	34.17	Linnert et al 2014
O'Brien et al., (2017)	Shuqualak			0.830067	33.0674	37.651	Campanian	Latest Cretaceous	78.43	34.17	Linnert et al 2014
O'Brien et al., (2017)	Shuqualak			0.81059	32.362	36.5053	Campanian	Latest Cretaceous	78.65	34.17	Linnert et al 2014
O'Brien et al., (2017)	Shuqualak			0.796047	31.8242	35.6498	Campanian	Latest Cretaceous	78.81	34.17	Linnert et al 2014
O'Brien et al., (2017)	Shuqualak			0.829397	33.0434	37.6116	Campanian	Latest Cretaceous	78.98	34.17	Linnert et al 2014
O'Brien et al., (2017)	Shuqualak			0.830171	33.0711	37.6571	Campanian	Latest Cretaceous	79.31	34.17	Linnert et al 2014
O'Brien et al., (2017)	Shuqualak			0.825652	32.9089	37.3913	Campanian	Latest Cretaceous	79.52	34.17	Linnert et al 2014
O'Brien et al., (2017)	Shuqualak			0.839503	33.4031	38.206	Campanian	Latest Cretaceous	79.54	34.17	Linnert et al 2014
O'Brien et al., (2017)	Shuqualak			0.862196	34.1955	39.541	Campanian	Latest Cretaceous	80.07	34.17	Linnert et al 2014
O'Brien et al., (2017)	Shuqualak			0.841983	33.4908	38.352	Campanian	Latest Cretaceous	80.35	34.17	Linnert et al 2014
O'Brien et al., (2017)	Shuqualak			0.868163	34.4003	39.8919	Campanian	Latest Cretaceous	80.62	34.17	Linnert et al 2014
O'Brien et al., (2017)	Shuqualak			0.86511	34.2957	39.7124	Campanian	Latest Cretaceous	80.95	34.17	Linnert et al 2014
O'Brien et al., (2017)	Shuqualak			0.902	35.5361	41.8824	Campanian	Latest Cretaceous	81.22	34.17	Linnert et al 2014
O'Brien et al., (2017)	Shuqualak			0.874226	34.6071	40.2486	Campanian	Latest Cretaceous	81.38	34.17	Linnert et al 2014
O'Brien et al., (2017)	Shuqualak			0.862324	34.1999	39.5485	Campanian	Latest Cretaceous	81.6	34.17	Linnert et al 2014
O'Brien et al., (2017)	Shuqualak			0.886975	35.0371	40.9985	Campanian	Latest Cretaceous	82.87	34.17	Linnert et al 2014
O'Brien et al., (2017)	Aderet 1 borehole			0.700917	28.0436	30.054	Maastrichtian	Latest Cretaceous	69.05	12.8	Alsenz et al 2013
O'Brien et al., (2017)	Aderet 1 borehole			0.72238	28.9396	31.3164	Maastrichtian	Latest Cretaceous	69.1	12.8	Alsenz et al 2013
O'Brien et al., (2017)	Aderet 1 borehole			0.706197	28.2665	30.3645	Maastrichtian	Latest Cretaceous	69.16	12.8	Alsenz et al 2013
O'Brien et al., (2017)	Aderet 1 borehole			0.714952	28.6325	30.8795	Maastrichtian	Latest Cretaceous	69.21	12.8	Alsenz et al 2013
O'Brien et al., (2017)	Aderet 1 borehole			0.703893	28.1694	30.229	Maastrichtian	Latest Cretaceous	69.26	12.8	Alsenz et al 2013
O'Brien et al., (2017)	Aderet 1 borehole			0.749127	30.0196	32.8898	Maastrichtian	Latest Cretaceous	69.31	12.8	Alsenz et al 2013
O'Brien et al., (2017)	Aderet 1 borehole			0.705208	28.2249	30.3064	Maastrichtian	Latest Cretaceous	69.37	12.8	Alsenz et al 2013
O'Brien et al., (2017)	Aderet 1 borehole			0.674916	26.9207	28.5244	Maastrichtian	Latest Cretaceous	69.43	12.8	Alsenz et al 2013
O'Brien et al., (2017)	Aderet 1 borehole			0.663591	26.418	27.8583	Maastrichtian	Latest Cretaceous	69.49	12.8	Alsenz et al 2013
O'Brien et al., (2017)	Aderet 1 borehole			0.668616	26.6421	28.1539	Maastrichtian	Latest Cretaceous	69.64	12.8	Alsenz et al 2013
O'Brien et al., (2017)	Aderet 1 borehole			0.685266	27.3728	29.1333	Maastrichtian	Latest Cretaceous	69.8	12.8	Alsenz et al 2013
O'Brien et al., (2017)	Aderet 1 borehole			0.636103	25.1613	26.2413	Maastrichtian	Latest Cretaceous	69.92	12.8	Alsenz et al 2013
O'Brien et al., (2017)	Aderet 1 borehole			0.684618	27.3447	29.0952	Maastrichtian	Latest Cretaceous	70.06	12.8	Alsenz et al 2013
O'Brien et al., (2017)	Aderet 1 borehole			0.692742	27.6951	29.5731	Maastrichtian	Latest Cretaceous	70.17	12.8	Alsenz et al 2013
O'Brien et al., (2017)	Aderet 1 borehole			0.675656	26.9532	28.568	Maastrichtian	Latest Cretaceous	70.42	12.8	Alsenz et al 2013
O'Brien et al., (2017)	Aderet 1 borehole			0.704854	28.21	30.2856	Maastrichtian	Latest Cretaceous	70.46	12.8	Alsenz et al 2013
O'Brien et al., (2017)	Aderet 1 borehole			0.738292	29.5868	32.2525	Maastrichtian	Latest Cretaceous	70.55	12.8	Alsenz et al 2013
O'Brien et al., (2017)	Aderet 1 borehole			0.689704	27.5645	29.3943	Maastrichtian	Latest Cretaceous	70.59	12.8	Alsenz et al 2013
O'Brien et al., (2017)	Aderet 1 borehole			0.706282	28.2701	30.3695	Maastrichtian	Latest Cretaceous	70.67	12.8	Alsenz et al 2013
O'Brien et al., (2017)	Aderet 1 borehole			0.696203	27.8431	29.7766	Maastrichtian	Latest Cretaceous	70.71	12.8	Alsenz et al 2013
O'Brien et al., (2017)	Aderet 1 borehole			0.744776	29.8466	32.6339	Maastrichtian	Latest Cretaceous	70.78	12.8	Alsenz et al 2013
O'Brien et al., (2017)	Aderet 1 borehole			0.70595	28.2562	30.35	Maastrichtian	Latest Cretaceous	70.86	12.8	Alsenz et al 2013
O'Brien et al., (2017)	Aderet 1 borehole			0.710075	28.4292	30.5926	Maastrichtian	Latest Cretaceous	71	12.8	Alsenz et al 2013
O'Brien et al., (2017)	Aderet 1 borehole			0.713021	28.5522	30.766	Maastrichtian	Latest Cretaceous	71.03	12.8	Alsenz et al 2013
O'Brien et al., (2017)	Aderet 1 borehole			0.736337	29.508	32.1375	Maastrichtian	Latest Cretaceous	71.07	12.8	Alsenz et al 2013
O'Brien et al., (2017)	Aderet 1 borehole			0.743918	29.8123	32.5834	Maastrichtian	Latest Cretaceous	71.16	12.8	Alsenz et al 2013
O'Brien et al., (2017)	Aderet 1 borehole			0.689877	27.572	29.4045	Maastrichtian	Latest Cretaceous	71.2	12.8	Alsenz et al 2013
O'Brien et al., (2017)	Aderet 1 borehole			0.713407	28.5683	30.7887	Maastrichtian	Latest Cretaceous	71.24	12.8	Alsenz et al 2013
O'Brien et al., (2017)	Aderet 1 borehole			0.705334	28.2302	30.3138	Maastrichtian	Latest Cretaceous	71.28	12.8	Alsenz et al 2013
O'Brien et al., (2017)	Aderet 1 borehole			0.695855	27.8283	29.7562	Maastrichtian	Latest Cretaceous	71.32	12.8	Alsenz et al 2013
O'Brien et al., (2017)	Aderet 1 borehole			0.726133	29.0935	31.5373	Maastrichtian	Latest Cretaceous	71.36	12.8	Alsenz et al 2013
O'Brien et al., (2017)	Aderet 1 borehole			0.691948	27.661	29.5263	Maastrichtian	Latest Cretaceous	71.45	12.8	Alsenz et al 2013
O'Brien et al., (2017)	Aderet 1 borehole			0.694129	27.7545	29.6547	Maastrichtian	Latest Cretaceous	71.49	12.8	Alsenz et al 2013
O'Brien et al., (2017)	Aderet 1 borehole			0.711178	28.4753	30.6575	Maastrichtian	Latest Cretaceous	71.53	12.8	Alsenz et al 2013
O'Brien et al., (2017)	Aderet 1 borehole			0.712954	28.5494	30.762	Maastrichtian	Latest Cretaceous	71.61	12.8	Alsenz et al 2013
O'Brien et al., (2017)	Aderet 1 borehole			0.702561	28.1132	30.1507	Maastrichtian	Latest Cretaceous	71.68	12.8	Alsenz et al 2013
O'Brien et al., (2017)	Aderet 1 borehole			0.750636	30.0794	32.9786	Maastrichtian	Latest Cretaceous	71.72	12.8	Alsenz et al 2013
O'Brien et al., (2017)	Aderet 1 borehole			0.724063	29.0087	31.4155	Campanian	Latest Cretaceous	72.26	12.8	Alsenz et al 2013
O'Brien et al., (2017)	Aderet 1 borehole			0.746713	29.9237	32.7478	Campanian	Latest Cretaceous	73.03	12.8	Alsenz et al 2013
O'Brien et al., (2017)	Aderet 1 borehole			0.717981	28.7581	31.0577	Campanian	Latest Cretaceous	73.41	12.8	Alsenz et al 2013
O'Brien et al., (2017)	Aderet 1 borehole			0.728206	29.1782	31.6592	Campanian	Latest Cretaceous	73.79	12.8	Alsenz et al 2013
O'Brien et al., (2017)	Aderet 1 borehole			0.713459	28.5704	30.7917	Campanian	Latest Cretaceous	74.18	12.8	Alsenz et al 2013
O'Brien et al., (2017)	Aderet 1 borehole			0.739404	29.6315	32.3179	Campanian	Latest Cretaceous	74.94	12.8	Alsenz et al 2013
O'Brien et al., (2017)	Aderet 1 borehole			0.723653	28.9919	31.3914	Campanian	Latest Cretaceous	75.33	12.09	Alsenz et al 2013
O'Brien et al., (2017)	Aderet 1 borehole			0.725395	29.0633	31.4938	Campanian	Latest Cretaceous	75.71	12.09	Alsenz et al 2013
O'Brien et al., (2017)	Aderet 1 borehole			0.708765	28.3744	30.5156	Campanian	Latest Cretaceous	75.83	12.09	Alsenz et al 2013
O'Brien et al., (2017)	Aderet 1 borehole			0.719784	28.8326	31.1638	Campanian	Latest Cretaceous	75.89	12.09	Alsenz et al 2013
O'Brien et al., (2017)	Aderet 1 borehole			0.721929	28.921	31.29	Campanian	Latest Cretaceous	75.95	12.09	Alsenz et al 2013
O'Brien et al., (2017)	Aderet 1 borehole			0.709767	28.4163	30.5745	Campanian	Latest Cretaceous	76.18	12.09	Alsenz et al 2013
O'Brien et al., (2017)	Aderet 1 borehole			0.625661	24.6696	25.6271	Campanian	Latest Cretaceous	76.48	12.09	Alsenz et al 2013
O'Brien et al., (2017)	Aderet 1 borehole			0.592227	23.0382	23.6604	Campanian	Latest Cretaceous	76.76	12.09	Alsenz et al 2013
O'Brien et al., (2017)	Aderet 1 borehole			0.739004	29.6155	32.2944	Campanian	Latest Cretaceous	77.15	12.09	Alsenz et al 2013
O'Brien et al., (2017)	Aderet 1 borehole			0.712672	28.5377	30.7454	Campanian	Latest Cretaceous	77.45	12.09	Alsenz et al 2013
O'Brien et al., (2017)	Aderet 1 borehole			0.695829	27.8272	29.7547	Campanian	Latest Cretaceous	77.74	12.09	Alsenz et al 2013
O'Brien et al., (2017)	Aderet 1 borehole			0.714286	28.6048	30.8403	Campanian	Latest Cretaceous	78.03	12.09	Alsenz et al 2013
O'Brien et al., (2017)	Aderet 1 borehole			0.736268	29.5052	32.1334	Campanian	Latest Cretaceous	78.91	12.09	Alsenz et al 2013
O'Brien et al., (2017)	Aderet 1 borehole			0.744637	29.841	32.6257	Campanian	Latest Cretaceous	79.5	12.09	Alsenz et al 2013
O'Brien et al., (2017)	Aderet 1 borehole			0.719272	28.8115	31.1336	Campanian	Latest Cretaceous	80.21	12.09	Alsenz et al 2013
O'Brien et al., (2017)	Aderet 1 borehole			0.732035	29.334	31.8844	Campanian	Latest Cretaceous	80.71	12.09	Alsenz et al 2013
O'Brien et al., (2017)	Aderet 1 borehole			0.790013	31.5982	35.2949	Campanian	Latest Cretaceous	81.93	12.09	Alsenz et al 2013
O'Brien et al., (2017)	Aderet 1 borehole			0.80581	32.1863	36.2241	Campanian	Latest Cretaceous	83.11	12.09	Alsenz et al 2013
O'Brien et al., (2017)	Aderet 1 borehole			0.781471	31.2752	34.7924	Campanian	Latest Cretaceous	83.62	12.09	Alsenz et al 2013
O'Brien et al., (2017)	Aderet 1 borehole			0.797477	31.8775	35.734	Santonian	early Late Cretaceous	84.03	12.09	Alsenz et al 2013
O'Brien et al., (2017)	Aderet 1 borehole			0.814996	32.5231	36.7645	Santonian	early Late Cretaceous	84.55	12.09	Alsenz et al 2013
O'Brien et al., (2017)	Aderet 1 borehole			0.834527	33.2265	37.9134	Santonian	early Late Cretaceous	84.95	12.09	Alsenz et al 2013
O'Brien et al., (2017)	PAMA Quarry			0.704453	28.1931	30.262	Maastrichtian	Latest Cretaceous	70.3648	12.78	Alsenz et al 2013
O'Brien et al., (2017)	PAMA Quarry			0.64358	25.5084	26.6812	Maastrichtian	Latest Cretaceous	70.4091	12.78	Alsenz et al 2013
O'Brien et al., (2017)	PAMA Quarry			0.716132	28.6815	30.9489	Maastrichtian	Latest Cretaceous	70.4646	12.78	Alsenz et al 2013
O'Brien et al., (2017)	PAMA Quarry			0.671554	26.7723	28.3267	Maastrichtian	Latest Cretaceous	70.4868	12.78	Alsenz et al 2013
O'Brien et al., (2017)	PAMA Quarry			0.70297	28.1305	30.1747	Maastrichtian	Latest Cretaceous	70.4978	12.78	Alsenz et al 2013
O'Brien et al., (2017)	PAMA Quarry			0.733013	29.3736	31.9419	Maastrichtian	Latest Cretaceous	70.6837	12.78	Alsenz et al 2013
O'Brien et al., (2017)	PAMA Quarry			0.666771	26.56	28.0454	Maastrichtian	Latest Cretaceous	70.7144	12.78	Alsenz et al 2013
O'Brien et al., (2017)	PAMA Quarry			0.691478	27.6409	29.4987	Maastrichtian	Latest Cretaceous	70.8318	12.78	Alsenz et al 2013
O'Brien et al., (2017)	PAMA Quarry			0.660714	26.2889	27.6891	Maastrichtian	Latest Cretaceous	70.8879	12.78	Alsenz et al 2013
O'Brien et al., (2017)	PAMA Quarry			0.662424	26.3657	27.7896	Maastrichtian	Latest Cretaceous	70.8981	12.78	Alsenz et al 2013
O'Brien et al., (2017)	PAMA Quarry			0.685349	27.3764	29.1382	Maastrichtian	Latest Cretaceous	70.9849	12.78	Alsenz et al 2013
O'Brien et al., (2017)	PAMA Quarry			0.695606	27.8177	29.7415	Maastrichtian	Latest Cretaceous	71.1139	12.78	Alsenz et al 2013
O'Brien et al., (2017)	PAMA Quarry			0.684471	27.3383	29.0866	Maastrichtian	Latest Cretaceous	71.1945	12.78	Alsenz et al 2013
O'Brien et al., (2017)	PAMA Quarry			0.676272	26.9803	28.6043	Maastrichtian	Latest Cretaceous	71.1986	12.78	Alsenz et al 2013
O'Brien et al., (2017)	PAMA Quarry			0.683274	27.2863	29.0161	Maastrichtian	Latest Cretaceous	71.2349	12.78	Alsenz et al 2013
O'Brien et al., (2017)	PAMA Quarry			0.661435	26.3213	27.7315	Maastrichtian	Latest Cretaceous	71.2429	12.78	Alsenz et al 2013
O'Brien et al., (2017)	PAMA Quarry			0.685	27.3612	29.1176	Maastrichtian	Latest Cretaceous	71.395	12.78	Alsenz et al 2013
O'Brien et al., (2017)	PAMA Quarry			0.748855	30.0088	32.8738	Maastrichtian	Latest Cretaceous	71.4346	12.78	Alsenz et al 2013
O'Brien et al., (2017)	PAMA Quarry			0.682054	27.2332	28.9443	Maastrichtian	Latest Cretaceous	71.6851	12.78	Alsenz et al 2013
O'Brien et al., (2017)	PAMA Quarry			0.668305	26.6283	28.1356	Maastrichtian	Latest Cretaceous	71.6908	12.78	Alsenz et al 2013
O'Brien et al., (2017)	PAMA Quarry			0.68052	27.1663	28.8541	Maastrichtian	Latest Cretaceous	71.8369	12.78	Alsenz et al 2013
O'Brien et al., (2017)	PAMA Quarry			0.634415	25.0824	26.1421	Campanian	Latest Cretaceous	73.2701	12.78	Alsenz et al 2013
O'Brien et al., (2017)	PAMA Quarry			0.67709	27.0162	28.6523	Campanian	Latest Cretaceous	73.7045	12.78	Alsenz et al 2013
O'Brien et al., (2017)	PAMA Quarry			0.672423	26.8107	28.3778	Campanian	Latest Cretaceous	74.1388	12.78	Alsenz et al 2013
O'Brien et al., (2017)	PAMA Quarry			0.671539	26.7717	28.3258	Campanian	Latest Cretaceous	75.5189	12.03	Alsenz et al 2013
O'Brien et al., (2017)	Cismon			0.644796	25.5645	26.7527	Aptian	Early Cretaceous	124.274	24.71	Bottini et al 2014
O'Brien et al., (2017)	Cismon			0.58103	22.4712	23.0018	Aptian	Early Cretaceous	124.337	24.71	Bottini et al 2014
O'Brien et al., (2017)	Cismon			0.655439	26.0508	27.3787	Aptian	Early Cretaceous	124.65	24.71	Bottini et al 2014
O'Brien et al., (2017)	Cismon			0.653534	25.9643	27.2667	Aptian	Early Cretaceous	124.737	24.71	Bottini et al 2014
O'Brien et al., (2017)	Cismon			0.638219	25.2599	26.3658	Aptian	Early Cretaceous	124.781	24.71	Bottini et al 2014
O'Brien et al., (2017)	Cismon			0.668859	26.6529	28.1682	Aptian	Early Cretaceous	125.16	24.71	Bottini et al 2014
O'Brien et al., (2017)	Cismon			0.619158	24.3592	25.2446	Aptian	Early Cretaceous	125.288	24.71	Bottini et al 2014
O'Brien et al., (2017)	Cismon			0.60657	23.7491	24.5041	Aptian	Early Cretaceous	125.357	24.71	Bottini et al 2014
O'Brien et al., (2017)	Bass River			0.89608	35.3405	41.5341	Turonian	early Late Cretaceous	93.1303	35.97	Van Helmond et al 2014
O'Brien et al., (2017)	Bass River			0.894613	35.2918	41.4478	Turonian	early Late Cretaceous	93.1408	35.97	Van Helmond et al 2014
O'Brien et al., (2017)	Bass River			0.911551	35.849	42.4442	Turonian	early Late Cretaceous	93.1919	35.97	Van Helmond et al 2014
O'Brien et al., (2017)	Bass River			0.908933	35.7636	42.2902	Turonian	early Late Cretaceous	93.2759	35.97	Van Helmond et al 2014
O'Brien et al., (2017)	Bass River			0.909777	35.7911	42.3398	Turonian	early Late Cretaceous	93.3274	35.97	Van Helmond et al 2014
O'Brien et al., (2017)	Bass River			0.900098	35.4734	41.7705	Turonian	early Late Cretaceous	93.3784	35.97	Van Helmond et al 2014
O'Brien et al., (2017)	Bass River			0.907982	35.7325	42.2342	Turonian	early Late Cretaceous	93.4223	35.97	Van Helmond et al 2014
O'Brien et al., (2017)	Bass River			0.922962	36.2186	43.1154	Turonian	early Late Cretaceous	93.4392	35.97	Van Helmond et al 2014
O'Brien et al., (2017)	Bass River			0.929196	36.4185	43.4821	Turonian	early Late Cretaceous	93.4557	35.97	Van Helmond et al 2014
O'Brien et al., (2017)	Bass River			0.927749	36.3722	43.397	Turonian	early Late Cretaceous	93.5164	35.97	Van Helmond et al 2014
O'Brien et al., (2017)	Bass River			0.929134	36.4166	43.4785	Turonian	early Late Cretaceous	93.5768	35.97	Van Helmond et al 2014
O'Brien et al., (2017)	Bass River			0.92222	36.1947	43.0718	Turonian	early Late Cretaceous	93.6101	35.97	Van Helmond et al 2014
O'Brien et al., (2017)	Bass River			0.925603	36.3034	43.2707	Turonian	early Late Cretaceous	93.6616	35.97	Van Helmond et al 2014
O'Brien et al., (2017)	Bass River			0.927858	36.3757	43.4034	Turonian	early Late Cretaceous	93.6705	35.97	Van Helmond et al 2014
O'Brien et al., (2017)	Bass River			0.923606	36.2393	43.1533	Turonian	early Late Cretaceous	93.6873	35.97	Van Helmond et al 2014
O'Brien et al., (2017)	Bass River			0.941219	36.8005	44.1894	Turonian	early Late Cretaceous	93.7831	35.97	Van Helmond et al 2014
O'Brien et al., (2017)	Bass River			0.944822	36.9139	44.4013	Turonian	early Late Cretaceous	93.7992	35.97	Van Helmond et al 2014
O'Brien et al., (2017)	Bass River			0.925539	36.3014	43.267	Turonian	early Late Cretaceous	93.8338	35.97	Van Helmond et al 2014
O'Brien et al., (2017)	Bass River			0.947272	36.9909	44.5454	Turonian	early Late Cretaceous	93.8595	35.97	Van Helmond et al 2014
O'Brien et al., (2017)	Bass River			0.921959	36.1863	43.0564	Turonian	early Late Cretaceous	93.8764	35.97	Van Helmond et al 2014
O'Brien et al., (2017)	Bass River			0.92551	36.3005	43.2653	Turonian	early Late Cretaceous	93.9021	35.97	Van Helmond et al 2014
O'Brien et al., (2017)	Bass River			0.916057	35.9955	42.7093	Cenomanian	early Late Cretaceous	93.9448	35.97	Van Helmond et al 2014
O'Brien et al., (2017)	Bass River			0.932432	36.5218	43.6725	Cenomanian	early Late Cretaceous	93.9794	35.97	Van Helmond et al 2014
O'Brien et al., (2017)	Bass River			0.910702	35.8213	42.3942	Cenomanian	early Late Cretaceous	93.9958	35.97	Van Helmond et al 2014
O'Brien et al., (2017)	Bass River			0.918755	36.0829	42.8679	Cenomanian	early Late Cretaceous	94.014	35.97	Van Helmond et al 2014
O'Brien et al., (2017)	Bass River			0.902864	35.5646	41.9332	Cenomanian	early Late Cretaceous	94.0216	35.97	Van Helmond et al 2014
O'Brien et al., (2017)	Bass River			0.923851	36.2472	43.1677	Cenomanian	early Late Cretaceous	94.0308	35.97	Van Helmond et al 2014
O'Brien et al., (2017)	Bass River			0.916571	36.0122	42.7395	Cenomanian	early Late Cretaceous	94.0397	35.97	Van Helmond et al 2014
O'Brien et al., (2017)	Bass River			0.925649	36.3049	43.2735	Cenomanian	early Late Cretaceous	94.0473	35.97	Van Helmond et al 2014
O'Brien et al., (2017)	Bass River			0.901662	35.525	41.8625	Cenomanian	early Late Cretaceous	94.0566	35.97	Van Helmond et al 2014
O'Brien et al., (2017)	Bass River			0.910741	35.8226	42.3965	Cenomanian	early Late Cretaceous	94.0654	35.97	Van Helmond et al 2014
O'Brien et al., (2017)	Bass River			0.90968	35.788	42.3341	Cenomanian	early Late Cretaceous	94.073	35.97	Van Helmond et al 2014
O'Brien et al., (2017)	Bass River			0.907724	35.7241	42.2191	Cenomanian	early Late Cretaceous	94.0823	35.97	Van Helmond et al 2014
O'Brien et al., (2017)	Bass River			0.907317	35.7107	42.1951	Cenomanian	early Late Cretaceous	94.0912	35.97	Van Helmond et al 2014
O'Brien et al., (2017)	Bass River			0.92025	36.1312	42.9559	Cenomanian	early Late Cretaceous	94.0988	35.97	Van Helmond et al 2014
O'Brien et al., (2017)	Bass River			0.907607	35.7202	42.2122	Cenomanian	early Late Cretaceous	94.1081	35.97	Van Helmond et al 2014
O'Brien et al., (2017)	Bass River			0.921708	36.1782	43.0417	Cenomanian	early Late Cretaceous	94.1182	35.97	Van Helmond et al 2014
O'Brien et al., (2017)	Bass River			0.90691	35.6974	42.1712	Cenomanian	early Late Cretaceous	94.1245	35.97	Van Helmond et al 2014
O'Brien et al., (2017)	Bass River			0.911237	35.8388	42.4257	Cenomanian	early Late Cretaceous	94.1338	35.97	Van Helmond et al 2014
O'Brien et al., (2017)	Bass River			0.941667	36.8146	44.2157	Cenomanian	early Late Cretaceous	94.1431	35.97	Van Helmond et al 2014
O'Brien et al., (2017)	Bass River			0.944356	36.8993	44.3739	Cenomanian	early Late Cretaceous	94.1503	35.97	Van Helmond et al 2014
O'Brien et al., (2017)	Bass River			0.929806	36.438	43.518	Cenomanian	early Late Cretaceous	94.1596	35.97	Van Helmond et al 2014
O'Brien et al., (2017)	Bass River			0.935085	36.6062	43.8285	Cenomanian	early Late Cretaceous	94.1697	35.97	Van Helmond et al 2014
O'Brien et al., (2017)	Bass River			0.931009	36.4764	43.5888	Cenomanian	early Late Cretaceous	94.1811	35.97	Van Helmond et al 2014
O'Brien et al., (2017)	Bass River			0.92961	36.4318	43.5065	Cenomanian	early Late Cretaceous	94.198	35.97	Van Helmond et al 2014
O'Brien et al., (2017)	Bass River			0.927331	36.3589	43.3724	Cenomanian	early Late Cretaceous	94.2199	35.97	Van Helmond et al 2014
O'Brien et al., (2017)	Bass River			0.924576	36.2705	43.2103	Cenomanian	early Late Cretaceous	94.2275	35.97	Van Helmond et al 2014
O'Brien et al., (2017)	Bass River			0.945722	36.9422	44.4543	Cenomanian	early Late Cretaceous	94.2364	35.97	Van Helmond et al 2014
O'Brien et al., (2017)	Bass River			0.844131	33.5664	38.4783	Cenomanian	early Late Cretaceous	94.2444	35.97	Van Helmond et al 2014
O'Brien et al., (2017)	Bass River			0.911532	35.8484	42.4431	Cenomanian	early Late Cretaceous	94.2532	35.97	Van Helmond et al 2014
O'Brien et al., (2017)	Bass River			0.852777	33.8691	38.9869	Cenomanian	early Late Cretaceous	94.2621	35.97	Van Helmond et al 2014
O'Brien et al., (2017)	Bass River			0.902491	35.5523	41.9112	Cenomanian	early Late Cretaceous	94.2701	35.97	Van Helmond et al 2014
O'Brien et al., (2017)	Bass River			0.867042	34.362	39.826	Cenomanian	early Late Cretaceous	94.2777	35.97	Van Helmond et al 2014
O'Brien et al., (2017)	Bass River			0.840557	33.4404	38.2681	Cenomanian	early Late Cretaceous	94.2878	35.97	Van Helmond et al 2014
O'Brien et al., (2017)	Bass River			0.875221	34.6409	40.3071	Cenomanian	early Late Cretaceous	94.2971	35.97	Van Helmond et al 2014
O'Brien et al., (2017)	Bass River			0.887089	35.0409	41.0052	Cenomanian	early Late Cretaceous	94.3047	35.97	Van Helmond et al 2014
O'Brien et al., (2017)	Bass River			0.902058	35.538	41.8857	Cenomanian	early Late Cretaceous	94.3123	35.97	Van Helmond et al 2014
O'Brien et al., (2017)	Bass River			0.883306	34.914	40.7827	Cenomanian	early Late Cretaceous	94.3229	35.97	Van Helmond et al 2014
O'Brien et al., (2017)	Bass River			0.906723	35.6913	42.1602	Cenomanian	early Late Cretaceous	94.3305	35.97	Van Helmond et al 2014
O'Brien et al., (2017)	Bass River			0.912021	35.8643	42.4718	Cenomanian	early Late Cretaceous	94.3393	35.97	Van Helmond et al 2014
O'Brien et al., (2017)	Bass River			0.92479	36.2773	43.2229	Cenomanian	early Late Cretaceous	94.3486	35.97	Van Helmond et al 2014
O'Brien et al., (2017)	Bass River			0.926609	36.3357	43.3299	Cenomanian	early Late Cretaceous	94.3549	35.97	Van Helmond et al 2014
O'Brien et al., (2017)	Bass River			0.938036	36.6998	44.0021	Cenomanian	early Late Cretaceous	94.3638	35.97	Van Helmond et al 2014
O'Brien et al., (2017)	Bass River			0.924587	36.2708	43.211	Cenomanian	early Late Cretaceous	94.3744	35.97	Van Helmond et al 2014
O'Brien et al., (2017)	Bass River			0.922086	36.1904	43.0639	Cenomanian	early Late Cretaceous	94.3819	35.97	Van Helmond et al 2014
O'Brien et al., (2017)	Bass River			0.928493	36.3961	43.4408	Cenomanian	early Late Cretaceous	94.3908	35.97	Van Helmond et al 2014
O'Brien et al., (2017)	Bass River			0.92758	36.3668	43.3871	Cenomanian	early Late Cretaceous	94.4014	35.97	Van Helmond et al 2014
O'Brien et al., (2017)	Bass River			0.918967	36.0897	42.8804	Cenomanian	early Late Cretaceous	94.4166	35.97	Van Helmond et al 2014
O'Brien et al., (2017)	Bass River			0.921034	36.1565	43.002	Cenomanian	early Late Cretaceous	94.4258	35.97	Van Helmond et al 2014
O'Brien et al., (2017)	Bass River			0.885868	35	40.9334	Cenomanian	early Late Cretaceous	94.4423	35.97	Van Helmond et al 2014
O'Brien et al., (2017)	Bass River			0.925561	36.3021	43.2683	Cenomanian	early Late Cretaceous	94.4512	35.97	Van Helmond et al 2014
O'Brien et al., (2017)	Bass River			0.908808	35.7595	42.2828	Cenomanian	early Late Cretaceous	94.4579	35.97	Van Helmond et al 2014
O'Brien et al., (2017)	Bass River			0.916636	36.0143	42.7433	Cenomanian	early Late Cretaceous	94.468	35.97	Van Helmond et al 2014
O'Brien et al., (2017)	Bass River			0.9063	35.6774	42.1353	Cenomanian	early Late Cretaceous	94.4769	35.97	Van Helmond et al 2014
O'Brien et al., (2017)	Bass River			0.850833	33.8013	38.8725	Cenomanian	early Late Cretaceous	94.4849	35.97	Van Helmond et al 2014
O'Brien et al., (2017)	Wunstrof			0.954711	37.2232	44.983	Turonian	early Late Cretaceous	93.4979	43.57	Van Helmond et al., 2015
O'Brien et al., (2017)	Wunstrof			0.957248	37.3021	45.1322	Turonian	early Late Cretaceous	93.6547	43.57	Van Helmond et al., 2015
O'Brien et al., (2017)	Wunstrof			0.933007	36.5401	43.7063	Turonian	early Late Cretaceous	93.7636	43.57	Van Helmond et al., 2015
O'Brien et al., (2017)	Wunstrof			0.950143	37.0808	44.7143	Turonian	early Late Cretaceous	93.7818	43.57	Van Helmond et al., 2015
O'Brien et al., (2017)	Wunstrof			0.940616	36.7814	44.1539	Turonian	early Late Cretaceous	93.8021	43.57	Van Helmond et al., 2015
O'Brien et al., (2017)	Wunstrof			0.920768	36.1479	42.9863	Turonian	early Late Cretaceous	93.8487	43.57	Van Helmond et al., 2015
O'Brien et al., (2017)	Wunstrof			0.948878	37.0412	44.6399	Turonian	early Late Cretaceous	93.8792	43.57	Van Helmond et al., 2015
O'Brien et al., (2017)	Wunstrof			0.934783	36.5966	43.8107	Turonian	early Late Cretaceous	93.8919	43.57	Van Helmond et al., 2015
O'Brien et al., (2017)	Wunstrof			0.944877	36.9157	44.4046	Turonian	early Late Cretaceous	93.9089	43.57	Van Helmond et al., 2015
O'Brien et al., (2017)	Wunstrof			0.937064	36.669	43.945	Turonian	early Late Cretaceous	93.9216	43.57	Van Helmond et al., 2015
O'Brien et al., (2017)	Wunstrof			0.946706	36.9731	44.5121	Turonian	early Late Cretaceous	93.9513	43.57	Van Helmond et al., 2015
O'Brien et al., (2017)	Wunstrof			0.931049	36.4777	43.5911	Turonian	early Late Cretaceous	93.9623	43.57	Van Helmond et al., 2015
O'Brien et al., (2017)	Wunstrof			0.937	36.667	43.9412	Turonian	early Late Cretaceous	93.9712	43.57	Van Helmond et al., 2015
O'Brien et al., (2017)	Wunstrof			0.896347	35.3494	41.5498	Cenomanian	early Late Cretaceous	94.0614	43.57	Van Helmond et al., 2015
O'Brien et al., (2017)	Wunstrof			0.899202	35.4438	41.7178	Cenomanian	early Late Cretaceous	94.0911	43.57	Van Helmond et al., 2015
O'Brien et al., (2017)	Wunstrof			0.899853	35.4653	41.7561	Cenomanian	early Late Cretaceous	94.1178	43.57	Van Helmond et al., 2015
O'Brien et al., (2017)	Wunstrof			0.951333	37.118	44.7843	Cenomanian	early Late Cretaceous	94.1686	43.57	Van Helmond et al., 2015
O'Brien et al., (2017)	Wunstrof			0.947625	37.0019	44.5662	Cenomanian	early Late Cretaceous	94.1801	43.57	Van Helmond et al., 2015
O'Brien et al., (2017)	Wunstrof			0.932245	36.5159	43.6615	Cenomanian	early Late Cretaceous	94.1886	43.57	Van Helmond et al., 2015
O'Brien et al., (2017)	Wunstrof			0.920333	36.1338	42.9608	Cenomanian	early Late Cretaceous	94.2182	43.57	Van Helmond et al., 2015
O'Brien et al., (2017)	Wunstrof			0.900936	35.5011	41.8198	Cenomanian	early Late Cretaceous	94.2309	43.57	Van Helmond et al., 2015
O'Brien et al., (2017)	Wunstrof			0.861126	34.1586	39.478	Cenomanian	early Late Cretaceous	94.2479	43.57	Van Helmond et al., 2015
O'Brien et al., (2017)	Wunstrof			0.801617	32.0314	35.9775	Cenomanian	early Late Cretaceous	94.3326	43.57	Van Helmond et al., 2015
O'Brien et al., (2017)	Wunstrof			0.945831	36.9456	44.4606	Cenomanian	early Late Cretaceous	94.3975	43.57	Van Helmond et al., 2015
O'Brien et al., (2017)	Wunstrof			0.93302	36.5405	43.7071	Cenomanian	early Late Cretaceous	94.4047	43.57	Van Helmond et al., 2015
O'Brien et al., (2017)	Wunstrof			0.96436	37.5219	45.5506	Cenomanian	early Late Cretaceous	94.4174	43.57	Van Helmond et al., 2015
O'Brien et al., (2017)	Wunstrof			0.941584	36.812	44.2108	Cenomanian	early Late Cretaceous	94.4301	43.57	Van Helmond et al., 2015
O'Brien et al., (2017)	Wunstrof			0.941247	36.8013	44.191	Cenomanian	early Late Cretaceous	94.4432	43.57	Van Helmond et al., 2015
O'Brien et al., (2017)	Brazos River			0.748954	30.0127	32.8796	Maastrichtian	Latest Cretaceous	66.67	35.21	Vellekoop et al., 2014
O'Brien et al., (2017)	Brazos River			0.747935	29.9723	32.8197	Maastrichtian	Latest Cretaceous	66.67	35.21	Vellekoop et al., 2014
O'Brien et al., (2017)	Brazos River			0.752187	30.1407	33.0698	Maastrichtian	Latest Cretaceous	66.67	35.21	Vellekoop et al., 2014
O'Brien et al., (2017)	Brazos River			0.773481	30.9699	34.3224	Maastrichtian	Latest Cretaceous	66.67	35.21	Vellekoop et al., 2014
O'Brien et al., (2017)	Brazos River			0.749249	30.0244	32.897	Maastrichtian	Latest Cretaceous	66.67	35.21	Vellekoop et al., 2014
O'Brien et al., (2017)	Brazos River			0.754377	30.2271	33.1987	Maastrichtian	Latest Cretaceous	66.67	35.21	Vellekoop et al., 2014
O'Brien et al., (2017)	Brazos River			0.753053	30.1749	33.1208	Maastrichtian	Latest Cretaceous	66.67	35.21	Vellekoop et al., 2014
O'Brien et al., (2017)	Meirs Farm 1			0.674716	26.9119	28.5127	Maastrichtian	Latest Cretaceous	66.59	37.37	Vellekoop et al., 2016
O'Brien et al., (2017)	Meirs Farm 1			0.706283	28.2702	30.3696	Maastrichtian	Latest Cretaceous	66.59	37.37	Vellekoop et al., 2016
O'Brien et al., (2017)	Meirs Farm 1			0.655033	26.0324	27.3549	Maastrichtian	Latest Cretaceous	66.59	37.37	Vellekoop et al., 2016
O'Brien et al., (2017)	Meirs Farm 1			0.613091	24.0667	24.8877	Maastrichtian	Latest Cretaceous	66.59	37.37	Vellekoop et al., 2016
O'Brien et al., (2017)	Meirs Farm 1			0.626682	24.718	25.6872	Maastrichtian	Latest Cretaceous	66.59	37.37	Vellekoop et al., 2016
O'Brien et al., (2017)	Meirs Farm 1			0.644769	25.5632	26.7511	Maastrichtian	Latest Cretaceous	66.59	37.37	Vellekoop et al., 2016
O'Brien et al., (2017)	DSDP 398			0.85	33.7723	38.8235	Aptian	Early Cretaceous	124.75	33.12	Naafs & Pancost, 2016
O'Brien et al., (2017)	DSDP 398			0.87	34.4631	40	Aptian	Early Cretaceous	124.75	33.12	Naafs & Pancost, 2016
O'Brien et al., (2017)	DSDP 398			0.91	35.7984	42.3529	Aptian	Early Cretaceous	124.75	33.12	Naafs & Pancost, 2016
O'Brien et al., (2017)	DSDP 398			0.87	34.4631	40	Aptian	Early Cretaceous	124.75	33.12	Naafs & Pancost, 2016
O'Brien et al., (2017)	DSDP 398			0.87	34.4631	40	Aptian	Early Cretaceous	124.75	33.12	Naafs & Pancost, 2016
O'Brien et al., (2017)	DSDP 398			0.89	35.1383	41.1765	Aptian	Early Cretaceous	124.75	33.12	Naafs & Pancost, 2016
O'Brien et al., (2017)	DSDP 398			0.88	34.8026	40.5882	Aptian	Early Cretaceous	124.75	33.12	Naafs & Pancost, 2016
O'Brien et al., (2017)	DSDP 398			0.9	35.4702	41.7647	Aptian	Early Cretaceous	124.75	33.12	Naafs & Pancost, 2016
O'Brien et al., (2017)	DSDP 398			0.9	35.4702	41.7647	Aptian	Early Cretaceous	124.75	33.12	Naafs & Pancost, 2016
O'Brien et al., (2017)	DSDP 398			0.92	36.1231	42.9412	Aptian	Early Cretaceous	124.75	33.12	Naafs & Pancost, 2016
O'Brien et al., (2017)	DSDP 398			0.93	36.4442	43.5294	Aptian	Early Cretaceous	124.75	33.12	Naafs & Pancost, 2016
O'Brien et al., (2017)	DSDP 398			0.93	36.4442	43.5294	Aptian	Early Cretaceous	124.75	33.12	Naafs & Pancost, 2016
O'Brien et al., (2017)	DSDP 398			0.95	37.0763	44.7059	Aptian	Early Cretaceous	124.75	33.12	Naafs & Pancost, 2016
O'Brien et al., (2017)	DSDP 398			0.94	36.7619	44.1176	Aptian	Early Cretaceous	124.75	33.12	Naafs & Pancost, 2016
O'Brien et al., (2017)	DSDP 398			0.86	34.1197	39.4118	Aptian	Early Cretaceous	124.75	33.12	Naafs & Pancost, 2016
O'Brien et al., (2017)	DSDP 398			0.95	37.0763	44.7059	Aptian	Early Cretaceous	124.75	33.12	Naafs & Pancost, 2016
O'Brien et al., (2017)	DSDP 398			0.92	36.1231	42.9412	Aptian	Early Cretaceous	124.75	33.12	Naafs & Pancost, 2016
O'Brien et al., (2017)	DSDP 398			0.93	36.4442	43.5294	Aptian	Early Cretaceous	124.75	33.12	Naafs & Pancost, 2016
O'Brien et al., (2017)	DSDP 398			0.92	36.1231	42.9412	Aptian	Early Cretaceous	124.75	33.12	Naafs & Pancost, 2016
O'Brien et al., (2017)	DSDP 398			0.92	36.1231	42.9412	Aptian	Early Cretaceous	124.75	33.12	Naafs & Pancost, 2016
O'Brien et al., (2017)	DSDP 398			0.91	35.7984	42.3529	Aptian	Early Cretaceous	124.75	33.12	Naafs & Pancost, 2016
O'Brien et al., (2017)	DSDP 398			0.88	34.8026	40.5882	Aptian	Early Cretaceous	124.75	33.12	Naafs & Pancost, 2016
O'Brien et al., (2017)	DSDP 398			0.91	35.7984	42.3529	Aptian	Early Cretaceous	124.75	33.12	Naafs & Pancost, 2016
O'Brien et al., (2017)	DSDP 398			0.88	34.8026	40.5882	Aptian	Early Cretaceous	124.75	33.12	Naafs & Pancost, 2016
O'Brien et al., (2017)	DSDP 398			0.89	35.1383	41.1765	Aptian	Early Cretaceous	124.75	33.12	Naafs & Pancost, 2016
O'Brien et al., (2017)	DSDP 398			0.86	34.1197	39.4118	Aptian	Early Cretaceous	124.75	33.12	Naafs & Pancost, 2016
O'Brien et al., (2017)	DSDP 398			0.9	35.4702	41.7647	Aptian	Early Cretaceous	124.75	33.12	Naafs & Pancost, 2016
Lunt et al. (2012)	ODP 1172	-43.96	149.93	0.771932	30.9104	26.4777	Ypresian	Eocene	49.0003	-57.32	Bijl et al. (2009)
Lunt et al. (2012)	ODP 1172	-43.96	149.93	0.774566	31.0116	26.2156	Ypresian	Eocene	49.1845	-57.32	Bijl et al. (2009)
Lunt et al. (2012)	ODP 1172	-43.96	149.93	0.786077	31.4498	27.1697	Ypresian	Eocene	49.3123	-57.32	Bijl et al. (2009)
Lunt et al. (2012)	ODP 1172	-43.96	149.93	0.673264	26.8479	20.6014	Ypresian	Eocene	49.3611	-57.32	Bijl et al. (2009)
Lunt et al. (2012)	ODP 1172	-43.96	149.93	0.802804	32.0753	27.2574	Ypresian	Eocene	49.3741	-57.32	Bijl et al. (2009)
Lunt et al. (2012)	ODP 1172	-43.96	149.93	0.771919	30.9099	26.3372	Ypresian	Eocene	49.3888	-57.32	Bijl et al. (2009)
Lunt et al. (2012)	ODP 1172	-43.96	149.93	0.777445	31.1218	25.8721	Ypresian	Eocene	49.5245	-57.32	Bijl et al. (2009)
Lunt et al. (2012)	ODP 1172	-43.96	149.93	0.760684	30.4744	25.7024	Ypresian	Eocene	49.7473	-57.32	Bijl et al. (2009)
Lunt et al. (2012)	ODP 1172	-43.96	149.93	0.802699	32.0714	27.1057	Ypresian	Eocene	50.1911	-57.32	Bijl et al. (2009)
Lunt et al. (2012)	ODP 1172	-43.96	149.93	0.783094	31.3369	26.0728	Ypresian	Eocene	50.2644	-57.32	Bijl et al. (2009)
Lunt et al. (2012)	ODP 1172	-43.96	149.93	0.773882	30.9853	26.6095	Ypresian	Eocene	50.4393	-57.32	Bijl et al. (2009)
Lunt et al. (2012)	ODP 1172	-43.96	149.93	0.782878	31.3287	26.2767	Ypresian	Eocene	50.7417	-57.32	Bijl et al. (2009)
Lunt et al. (2012)	ODP 1172	-43.96	149.93	0.779245	31.1905	25.4244	Ypresian	Eocene	50.8879	-57.32	Bijl et al. (2009)
Lunt et al. (2012)	ODP 1172	-43.96	149.93	0.769214	30.8056	24.8843	Ypresian	Eocene	51.4934	-57.32	Bijl et al. (2009)
Lunt et al. (2012)	ODP 1172	-43.96	149.93	0.729895	29.247	23.8032	Ypresian	Eocene	52.8031	-57.32	Bijl et al. (2009)
Lunt et al. (2012)	ODP 1172	-43.96	149.93	0.782255	31.305	24.9973	Ypresian	Eocene	53.0033	-57.32	Bijl et al. (2009)
Lunt et al. (2012)	ODP 1172	-43.96	149.93	0.772839	30.9453	25.3878	Ypresian	Eocene	53.0643	-57.32	Bijl et al. (2009)
Lunt et al. (2012)	ODP 1172	-43.96	149.93	0.733829	29.4067	25.0933	Ypresian	Eocene	53.2645	-57.32	Bijl et al. (2009)
Lunt et al. (2012)	ODP 1172	-43.96	149.93	0.778736	31.1711	25.6155	Ypresian	Eocene	53.3254	-57.32	Bijl et al. (2009)
Lunt et al. (2012)	ODP 1172	-43.96	149.93	0.74967	30.0411	24.4352	Ypresian	Eocene	53.5419	-57.32	Bijl et al. (2009)
Lunt et al. (2012)	ODP 1172	-43.96	149.93	0.730085	29.2548	24.8535	Ypresian	Eocene	53.6111	-57.32	Bijl et al. (2009)
Lunt et al. (2012)	ODP 1172	-43.96	149.93	0.707576	28.3245	24.3935	Ypresian	Eocene	53.7081	-57.32	Bijl et al. (2009)
Lunt et al. (2012)	ODP 1172	-43.96	149.93	0.725021	29.048	24.9049	Ypresian	Eocene	53.8274	-57.32	Bijl et al. (2009)
Lunt et al. (2012)	ODP 1172	-43.96	149.93	0.682305	27.2441	23.6597	Ypresian	Eocene	53.9705	-57.32	Bijl et al. (2009)
Lunt et al. (2012)	ODP 1172	-43.96	149.93	0.685516	27.3836	24.3127	Ypresian	Eocene	54.1471	-57.32	Bijl et al. (2009)
Lunt et al. (2012)	ODP 1172	-43.96	149.93	0.641549	25.4145	22.0308	Ypresian	Eocene	54.2854	-57.32	Bijl et al. (2009)
Lunt et al. (2012)	ODP 1172	-43.96	149.93	0.661765	26.3361	23.0208	Ypresian	Eocene	54.38	-57.32	Bijl et al. (2009)
Lunt et al. (2012)	ODP 1172	-43.96	149.93	0.623343	24.5593	21.703	Ypresian	Eocene	54.4842	-57.32	Bijl et al. (2009)
Lunt et al. (2012)	ODP 1172	-43.96	149.93	0.675594	26.9505	22.8733	Ypresian	Eocene	54.6035	-57.32	Bijl et al. (2009)
Lunt et al. (2012)	ODP 1172	-43.96	149.93	0.651541	25.8736	22.4771	Ypresian	Eocene	54.7872	-57.32	Bijl et al. (2009)
Lunt et al. (2012)	ODP 1172	-43.96	149.93	0.64927	25.7699	22.3568	Ypresian	Eocene	54.8031	-57.32	Bijl et al. (2009)
Lunt et al. (2012)	ODP 1172	-43.96	149.93	0.649688	25.789	21.5999	Ypresian	Eocene	54.819	-57.32	Bijl et al. (2009)
Lunt et al. (2012)	ODP 1172	-43.96	149.93	0.638923	25.2927	21.3967	Ypresian	Eocene	54.8349	-57.32	Bijl et al. (2009)
Lunt et al. (2012)	ODP 1172	-43.96	149.93	0.653475	25.9617	22.0446	Ypresian	Eocene	54.8428	-57.32	Bijl et al. (2009)
Lunt et al. (2012)	ODP 1172	-43.96	149.93	0.663333	26.4064	22.5837	Ypresian	Eocene	54.853	-57.32	Bijl et al. (2009)
Lunt et al. (2012)	ODP 1172	-43.96	149.93	0.642063	25.4383	21.7598	Ypresian	Eocene	54.865	-57.32	Bijl et al. (2009)
Lunt et al. (2012)	ODP 1172	-43.96	149.93	0.627115	24.7385	20.7582	Ypresian	Eocene	54.88	-57.32	Bijl et al. (2009)
Lunt et al. (2012)	Waipara River	-43.06	172.6	0.754768	30.2425	25.7762	Ypresian	Eocene	49.72	-46.89	Hollis et al. (2012)
Lunt et al. (2012)	Waipara River	-43.06	172.6	0.77917	31.1876	25.3307	Ypresian	Eocene	50.09	-46.89	Hollis et al. (2012)
Lunt et al. (2012)	Waipara River	-43.06	172.6	0.782173	31.3019	25.3015	Ypresian	Eocene	50.47	-46.89	Hollis et al. (2012)
Lunt et al. (2012)	Waipara River	-43.06	172.6	0.748852	30.0087	24.9878	Ypresian	Eocene	50.84	-46.89	Hollis et al. (2012)
Lunt et al. (2012)	Waipara River	-43.06	172.6	0.804126	32.1242	25.6982	Ypresian	Eocene	51.22	-46.89	Hollis et al. (2012)
Lunt et al. (2012)	Waipara River	-43.06	172.6	0.806159	32.1992	25.3482	Ypresian	Eocene	51.47	-46.89	Hollis et al. (2012)
Lunt et al. (2012)	Waipara River	-43.06	172.6	0.800591	31.9933	26.449	Ypresian	Eocene	51.59	-46.89	Hollis et al. (2012)
Lunt et al. (2012)	Hatchtigbee	31.66	-88.1	0.74	29.6604	20.0525	Ypresian	Eocene	53	28.97	Keating-Bitoni et al. (2011)
Lunt et al. (2012)	Hatchtigbee	31.66	-88.1	0.73	29.3757	20.245	Ypresian	Eocene	53	28.97	Keating-Bitoni et al. (2011)
Lunt et al. (2012)	Hatchtigbee	31.66	-88.1	0.77	30.7939	16.3495	Ypresian	Eocene	53	28.97	Keating-Bitoni et al. (2011)
Lunt et al. (2012)	Hatchtigbee	31.66	-88.1	0.76	30.4994	21.5813	Ypresian	Eocene	53	28.97	Keating-Bitoni et al. (2011)
Lunt et al. (2012)	Hatchtigbee	31.66	-88.1	0.69	27.6089	21.0216	Ypresian	Eocene	53	28.97	Keating-Bitoni et al. (2011)
Lunt et al. (2012)	Hatchtigbee	31.66	-88.1	0.74	29.7156	23.803	Ypresian	Eocene	53	28.97	Keating-Bitoni et al. (2011)
Lunt et al. (2012)	Bass River	39.5913	-74.4332	0.755036	30.253	22.6755	Thanetian	Paleocene		35.53	Sluijs et al. (2007)
Lunt et al. (2012)	Bass River	39.5913	-74.4332	0.759914	30.4443	23.7056	Thanetian	Paleocene		35.53	Sluijs et al. (2007)
Lunt et al. (2012)	Bass River	39.5913	-74.4332	0.758918	30.4053	23.2808	Thanetian	Paleocene		35.53	Sluijs et al. (2007)
Lunt et al. (2012)	Bass River	39.5913	-74.4332	0.764402	30.6192	23.6949	Thanetian	Paleocene		35.53	Sluijs et al. (2007)
Lunt et al. (2012)	Bass River	39.5913	-74.4332	0.766121	30.686	23.1785	Thanetian	Paleocene		35.53	Sluijs et al. (2007)
Lunt et al. (2012)	Bass River	39.5913	-74.4332	0.773488	30.9702	24.4248	Thanetian	Paleocene		35.53	Sluijs et al. (2007)
Lunt et al. (2012)	Bass River	39.5913	-74.4332	0.770611	30.8595	23.6347	Thanetian	Paleocene		35.53	Sluijs et al. (2007)
Lunt et al. (2012)	Bass River	39.5913	-74.4332	0.770324	30.8485	24.3796	Thanetian	Paleocene		35.53	Sluijs et al. (2007)
Lunt et al. (2012)	Bass River	39.5913	-74.4332	0.767013	30.7205	23.6897	Thanetian	Paleocene		35.53	Sluijs et al. (2007)
Lunt et al. (2012)	Bass River	39.5913	-74.4332	0.753666	30.199	23.8427	Thanetian	Paleocene		35.53	Sluijs et al. (2007)
Lunt et al. (2012)	Bass River	39.5913	-74.4332	0.753785	30.2037	23.1195	Thanetian	Paleocene		35.53	Sluijs et al. (2007)
Lunt et al. (2012)	Bass River	39.5913	-74.4332	0.748157	29.9811	23.1402	Thanetian	Paleocene		35.53	Sluijs et al. (2007)
Lunt et al. (2012)	Bass River	39.5913	-74.4332	0.743945	29.8134	22.3082	Thanetian	Paleocene		35.53	Sluijs et al. (2007)
Lunt et al. (2012)	Bass River	39.5913	-74.4332	0.728341	29.1837	26.1006	Thanetian	Paleocene		35.53	Sluijs et al. (2007)
Lunt et al. (2012)	Bass River	39.5913	-74.4332	0.730643	29.2774	25.7492	Thanetian	Paleocene		35.53	Sluijs et al. (2007)
Lunt et al. (2012)	Bass River	39.5913	-74.4332	0.728997	29.2105	22.0261	Thanetian	Paleocene		35.53	Sluijs et al. (2007)
Lunt et al. (2012)	Bass River	39.5913	-74.4332	0.728339	29.1836	21.5273	Thanetian	Paleocene		35.53	Sluijs et al. (2007)
Lunt et al. (2012)	Bass River	39.5913	-74.4332	0.726752	29.1188	22.5947	Thanetian	Paleocene		35.53	Sluijs et al. (2007)
Lunt et al. (2012)	Bass River	39.5913	-74.4332	0.74427	29.8264	23.1638	Thanetian	Paleocene		35.53	Sluijs et al. (2007)
Lunt et al. (2012)	Bass River	39.5913	-74.4332	0.726798	29.1207	22.1293	Thanetian	Paleocene		35.53	Sluijs et al. (2007)
Lunt et al. (2012)	Bass River	39.5913	-74.4332	0.7375	29.5549	22.381	Thanetian	Paleocene		35.53	Sluijs et al. (2007)
Lunt et al. (2012)	Wilson lake	39.65	-75.04	0.707386	28.3165	21.1722	Thanetian	Paleocene		35.75	Zachos et al. (2006)
Lunt et al. (2012)	Wilson lake	39.65	-75.04	0.693243	27.7166	21.0963	Thanetian	Paleocene		35.75	Zachos et al. (2006)
Lunt et al. (2012)	Wilson lake	39.65	-75.04	0.658778	26.2017	20.5411	Thanetian	Paleocene		35.75	Zachos et al. (2006)
Lunt et al. (2012)	Wilson lake	39.65	-75.04	0.658228	26.1769	20.5702	Thanetian	Paleocene		35.75	Zachos et al. (2006)
Lunt et al. (2012)	Wilson lake	39.65	-75.04	0.723959	29.0044	21.7709	Thanetian	Paleocene		35.75	Zachos et al. (2006)
Lunt et al. (2012)	Wilson lake	39.65	-75.04	0.716257	28.6867	20.7751	Thanetian	Paleocene		35.75	Zachos et al. (2006)
Lunt et al. (2012)	Wilson lake	39.65	-75.04	0.734489	29.4334	22.1071	Thanetian	Paleocene		35.75	Zachos et al. (2006)
Lunt et al. (2012)	Wilson lake	39.65	-75.04	0.718614	28.7843	21.4093	Thanetian	Paleocene		35.75	Zachos et al. (2006)
Lunt et al. (2012)	Wilson lake	39.65	-75.04	0.701376	28.063	21.9571	Thanetian	Paleocene		35.75	Zachos et al. (2006)
Lunt et al. (2012)	Wilson lake	39.65	-75.04	0.695584	27.8167	20.7615	Thanetian	Paleocene		35.75	Zachos et al. (2006)
Lunt et al. (2012)	ACEX 302-4A	87.87	136.18	0.459958	15.5264	11.2828	Ypresian	Eocene		78.03	Sluijs et al. (2008)
Lunt et al. (2012)	ACEX 302-4A	87.87	136.18	0.457718	15.3828	10.8805	Ypresian	Eocene		78.03	Sluijs et al. (2008)
Lunt et al. (2012)	ACEX 302-4A	87.87	136.18	0.458541	15.4324	11.3075	Ypresian	Eocene		78.03	Sluijs et al. (2008)
Lunt et al. (2012)	ACEX 302-4A	87.87	136.18	0.457068	15.3402	10.7501	Ypresian	Eocene		78.03	Sluijs et al. (2008)
Lunt et al. (2012)	ACEX 302-4A	87.87	136.18	0.434756	13.8413	8.83617	Ypresian	Eocene		78.03	Sluijs et al. (2008)
Lunt et al. (2012)	ACEX 302-4A	87.87	136.18	0.468434	16.0267	11.1557	Ypresian	Eocene		78.03	Sluijs et al. (2008)
Lunt et al. (2012)	ACEX 302-4A	87.87	136.18	0.481651	16.8836	11.673	Ypresian	Eocene		78.03	Sluijs et al. (2008)
Lunt et al. (2012)	ACEX 302-4A	87.87	136.18	0.560457	21.3999	20.7611	Ypresian	Eocene		78.03	Sluijs et al. (2008)
Lunt et al. (2012)	ACEX 302-4A	87.87	136.18	0.547073	20.6816	19.7507	Ypresian	Eocene		78.03	Sluijs et al. (2008)
Lunt et al. (2012)	ACEX 302-4A	87.87	136.18	0.563052	21.5341	21.3713	Ypresian	Eocene		78.03	Sluijs et al. (2008)
Lunt et al. (2012)	ACEX 302-4A	87.87	136.18	0.577524	22.2913	22.5866	Ypresian	Eocene		78.03	Sluijs et al. (2008)
Lunt et al. (2012)	ACEX 302-4A	87.87	136.18	0.581298	22.4849	22.4967	Ypresian	Eocene		78.03	Sluijs et al. (2008)
Lunt et al. (2012)	ACEX 302-4A	87.87	136.18	0.600263	23.4385	25.0124	Ypresian	Eocene		78.03	Sluijs et al. (2008)
Lunt et al. (2012)	ACEX 302-4A	87.87	136.18	0.576836	22.2556	24.7932	Ypresian	Eocene		78.03	Sluijs et al. (2008)
Lunt et al. (2012)	ACEX 302-4A	87.87	136.18	0.543933	20.51	21.7038	Ypresian	Eocene		78.03	Sluijs et al. (2008)
Lunt et al. (2012)	ACEX 302-4A	87.87	136.18	0.577967	22.3141	24.9311	Ypresian	Eocene		78.03	Sluijs et al. (2008)
Lunt et al. (2012)	ACEX 302-4A	87.87	136.18	0.611551	23.9908	26.6654	Ypresian	Eocene		78.03	Sluijs et al. (2008)
Lunt et al. (2012)	ACEX 302-4A	87.87	136.18	0.56394	21.5843	23.9757	Ypresian	Eocene		78.03	Sluijs et al. (2008)
Lunt et al. (2012)	ACEX 302-4A	87.87	136.18	0.586867	22.768	25.0495	Ypresian	Eocene		78.03	Sluijs et al. (2008)
Lunt et al. (2012)	ACEX 302-4A	87.87	136.18	0.572592	22.0353	24.2613	Ypresian	Eocene		78.03	Sluijs et al. (2008)
Lunt et al. (2012)	ACEX 302-4A	87.87	136.18	0.568805	21.8395	24.2828	Ypresian	Eocene		78.03	Sluijs et al. (2008)
Lunt et al. (2012)	ACEX 302-4A	87.87	136.18	0.576684	22.2481	23.4633	Ypresian	Eocene		78.03	Sluijs et al. (2008)
Lunt et al. (2012)	ACEX 302-4A	87.87	136.18	0.605681	23.7052	26.4466	Ypresian	Eocene		78.03	Sluijs et al. (2008)
Lunt et al. (2012)	ACEX 302-4A	87.87	136.18	0.514153	18.8387	17.7563	Ypresian	Eocene		78.03	Sluijs et al. (2008)
Lunt et al. (2012)	ACEX 302-4A	87.87	136.18	0.554858	21.0998	23.1662	Ypresian	Eocene		78.03	Sluijs et al. (2008)
Lunt et al. (2012)	ACEX 302-4A	87.87	136.18	0.566751	21.7319	23.0277	Ypresian	Eocene		78.03	Sluijs et al. (2008)
Lunt et al. (2012)	ACEX 302-4A	87.87	136.18	0.612926	24.0587	26.1463	Ypresian	Eocene		78.03	Sluijs et al. (2008)
Lunt et al. (2012)	ACEX 302-4A	87.87	136.18	0.570176	21.9104	24.6099	Ypresian	Eocene		78.03	Sluijs et al. (2008)
Lunt et al. (2012)	ACEX 302-4A	87.87	136.18	0.581958	22.5179	24.4125	Ypresian	Eocene		78.03	Sluijs et al. (2008)
Lunt et al. (2012)	ACEX 302-4A	87.87	136.18	0.584811	22.663	24.8986	Ypresian	Eocene		78.03	Sluijs et al. (2008)
Lunt et al. (2012)	ACEX 302-4A	87.87	136.18	0.534635	19.9955	21.0624	Ypresian	Eocene		78.03	Sluijs et al. (2008)
Lunt et al. (2012)	ACEX 302-4A	87.87	136.18	0.517337	19.0208	18.6413	Ypresian	Eocene		78.03	Sluijs et al. (2008)
Lunt et al. (2012)	ACEX 302-4A	87.87	136.18	0.583	22.5697	22.3319	Ypresian	Eocene		78.03	Sluijs et al. (2008)
Lunt et al. (2012)	ACEX 302-4A	87.87	136.18	0.565703	21.6709	20.8299	Ypresian	Eocene		78.03	Sluijs et al. (2008)
Lunt et al. (2012)	ACEX 302-4A	87.87	136.18	0.528992	19.6762	16.5669	Ypresian	Eocene		78.03	Sluijs et al. (2008)
Lunt et al. (2012)	ACEX 302-4A	87.87	136.18	0.594813	23.1671	24.4185	Ypresian	Eocene		78.03	Sluijs et al. (2008)
Lunt et al. (2012)	ACEX 302-4A	87.87	136.18	0.58888	22.8649	24.2117	Ypresian	Eocene		78.03	Sluijs et al. (2008)
Lunt et al. (2012)	ACEX 302-4A	87.87	136.18	0.572712	22.0424	24.1562	Ypresian	Eocene		78.03	Sluijs et al. (2008)
Cramwinkel et al. (2018)	ODP 959	3.63	-2.74	0.643275	25.4943		Rupelian	Oligocene	31.2076	-3.39
Cramwinkel et al. (2018)	ODP 959	3.63	-2.74	0.644662	25.5583		Rupelian	Oligocene	31.347	-3.39
Cramwinkel et al. (2018)	ODP 959	3.63	-2.74	0.65834	26.182		Rupelian	Oligocene	31.4897	-3.39
Cramwinkel et al. (2018)	ODP 959	3.63	-2.74	0.635557	25.1358		Rupelian	Oligocene	31.6522	-3.39
Cramwinkel et al. (2018)	ODP 959	3.63	-2.74	0.639925	25.3392		Rupelian	Oligocene	31.7877	-3.39
Cramwinkel et al. (2018)	ODP 959	3.63	-2.74	0.647619	25.6942		Rupelian	Oligocene	31.928	-3.39
Cramwinkel et al. (2018)	ODP 959	3.63	-2.74	0.672092	26.7873		Rupelian	Oligocene	32.0777	-3.39
Cramwinkel et al. (2018)	ODP 959	3.63	-2.74	0.659612	26.2393		Rupelian	Oligocene	32.2181	-3.39
Cramwinkel et al. (2018)	ODP 959	3.63	-2.74	0.670485	26.725		Rupelian	Oligocene	32.3584	-3.39
Cramwinkel et al. (2018)	ODP 959	3.63	-2.74	0.682333	27.244		Rupelian	Oligocene	32.508	-3.39
Cramwinkel et al. (2018)	ODP 959	3.63	-2.74	0.677571	27.0441		Rupelian	Oligocene	32.5268	-3.39
Cramwinkel et al. (2018)	ODP 959	3.63	-2.74	0.657839	26.1594		Rupelian	Oligocene	32.6686	-3.39
Cramwinkel et al. (2018)	ODP 959	3.63	-2.74	0.655315	26.0452		Rupelian	Oligocene	32.8075	-3.39
Cramwinkel et al. (2018)	ODP 959	3.63	-2.74	0.673439	26.8284		Rupelian	Oligocene	32.9399	-3.39
Cramwinkel et al. (2018)	ODP 959	3.63	-2.74	0.664257	26.4439		Rupelian	Oligocene	32.9769	-3.39
Cramwinkel et al. (2018)	ODP 959	3.63	-2.74	0.673067	26.8392		Rupelian	Oligocene	33.1879	-3.39
Cramwinkel et al. (2018)	ODP 959	3.63	-2.74	0.678879	27.0946		Rupelian	Oligocene	33.258	-3.39
Cramwinkel et al. (2018)	ODP 959	3.63	-2.74	0.656142	26.0905		Rupelian	Oligocene	33.3826	-3.39
Cramwinkel et al. (2018)	ODP 959	3.63	-2.74	0.682143	27.269		Rupelian	Oligocene	33.426	-3.39
Cramwinkel et al. (2018)	ODP 959	3.63	-2.74	0.660932	26.2987		Rupelian	Oligocene	33.4952	-3.39
Cramwinkel et al. (2018)	ODP 959	3.63	-2.74	0.658329	26.1815		Rupelian	Oligocene	33.5472	-3.39
Cramwinkel et al. (2018)	ODP 959	3.63	-2.74	0.665818	26.5175		Rupelian	Oligocene	33.8381	-3.39
Cramwinkel et al. (2018)	ODP 959	3.63	-2.74	0.679924	27.1436		Rupelian	Oligocene	33.8556	-3.39
Cramwinkel et al. (2018)	ODP 959	3.63	-2.74	0.67986	27.1375		Priabonian	Eocene	34.2681	-3.39
Cramwinkel et al. (2018)	ODP 959	3.63	-2.74	0.708642	28.3682		Priabonian	Eocene	34.3106	-3.39
Cramwinkel et al. (2018)	ODP 959	3.63	-2.74	0.682681	27.2605		Priabonian	Eocene	34.7125	-3.39
Cramwinkel et al. (2018)	ODP 959	3.63	-2.74	0.704589	28.1986		Priabonian	Eocene	34.763	-3.39
Cramwinkel et al. (2018)	ODP 959	3.63	-2.74	0.68995	27.5751		Priabonian	Eocene	34.9017	-3.39
Cramwinkel et al. (2018)	ODP 959	3.63	-2.74	0.711804	28.5014		Priabonian	Eocene	35.1948	-5.6
Cramwinkel et al. (2018)	ODP 959	3.63	-2.74	0.737959	29.581		Priabonian	Eocene	35.2126	-5.6
Cramwinkel et al. (2018)	ODP 959	3.63	-2.74	0.712352	28.5243		Priabonian	Eocene	35.7225	-5.6
Cramwinkel et al. (2018)	ODP 959	3.63	-2.74	0.689461	27.5541		Priabonian	Eocene	35.8634	-5.6
Cramwinkel et al. (2018)	ODP 959	3.63	-2.74	0.6958	27.8259		Priabonian	Eocene	36.1558	-5.6
Cramwinkel et al. (2018)	ODP 959	3.63	-2.74	0.698584	27.9445		Priabonian	Eocene	36.5749	-5.6
Cramwinkel et al. (2018)	ODP 959	3.63	-2.74	0.715393	28.6509		Priabonian	Eocene	37.0077	-5.6
Cramwinkel et al. (2018)	ODP 959	3.63	-2.74	0.722357	28.9386		Priabonian	Eocene	37.1471	-5.6
Cramwinkel et al. (2018)	ODP 959	3.63	-2.74	0.698742	27.9513		Priabonian	Eocene	37.4568	-5.6
Cramwinkel et al. (2018)	ODP 959	3.63	-2.74	0.720089	28.8452		Priabonian	Eocene	37.5971	-5.6
Cramwinkel et al. (2018)	ODP 959	3.63	-2.74	0.710043	28.4279		Bartonian	Eocene	37.9054	-5.6
Cramwinkel et al. (2018)	ODP 959	3.63	-2.74	0.703162	28.1386		Bartonian	Eocene	38.362	-5.6
Cramwinkel et al. (2018)	ODP 959	3.63	-2.74	0.71124	28.4779		Bartonian	Eocene	38.7842	-5.6
Cramwinkel et al. (2018)	ODP 959	3.63	-2.74	0.716201	28.6844		Bartonian	Eocene	38.901	-5.6
Cramwinkel et al. (2018)	ODP 959	3.63	-2.74	0.730717	29.2804		Bartonian	Eocene	39.01	-5.6
Cramwinkel et al. (2018)	ODP 959	3.63	-2.74	0.700345	28.0193		Bartonian	Eocene	39.2369	-5.6
Cramwinkel et al. (2018)	ODP 959	3.63	-2.74	0.72842	29.1869		Bartonian	Eocene	39.329	-5.6
Cramwinkel et al. (2018)	ODP 959	3.63	-2.74	0.739289	29.6269		Bartonian	Eocene	39.417	-5.6
Cramwinkel et al. (2018)	ODP 959	3.63	-2.74	0.731962	29.331		Bartonian	Eocene	39.5021	-5.6
Cramwinkel et al. (2018)	ODP 959	3.63	-2.74	0.765585	30.6651		Bartonian	Eocene	39.5723	-5.6
Cramwinkel et al. (2018)	ODP 959	3.63	-2.74	0.780173	31.2259		Bartonian	Eocene	39.6822	-5.6
Cramwinkel et al. (2018)	ODP 959	3.63	-2.74	0.758143	30.375		Bartonian	Eocene	39.7641	-5.6
Cramwinkel et al. (2018)	ODP 959	3.63	-2.74	0.769124	30.8022		Bartonian	Eocene	39.8427	-5.6
Cramwinkel et al. (2018)	ODP 959	3.63	-2.74	0.758579	30.392		Bartonian	Eocene	39.8928	-5.6
Cramwinkel et al. (2018)	ODP 959	3.63	-2.74	0.803909	32.1162		Bartonian	Eocene	39.9381	-5.6
Cramwinkel et al. (2018)	ODP 959	3.63	-2.74	0.822788	32.8057		Bartonian	Eocene	39.9957	-5.6
Cramwinkel et al. (2018)	ODP 959	3.63	-2.74	0.828406	33.0078		Bartonian	Eocene	40.1105	-5.6
Cramwinkel et al. (2018)	ODP 959	3.63	-2.74	0.80318	32.0892		Bartonian	Eocene	40.1233	-5.6
Cramwinkel et al. (2018)	ODP 959	3.63	-2.74	0.777966	31.1417		Bartonian	Eocene	40.4738	-5.6
Cramwinkel et al. (2018)	ODP 959	3.63	-2.74	0.745759	29.8858		Bartonian	Eocene	40.5497	-5.6
Cramwinkel et al. (2018)	ODP 959	3.63	-2.74	0.74188	29.7308		Bartonian	Eocene	40.632	-5.6
Cramwinkel et al. (2018)	ODP 959	3.63	-2.74	0.735669	29.4811		Bartonian	Eocene	40.8307	-5.6
Cramwinkel et al. (2018)	ODP 959	3.63	-2.74	0.725554	29.0698		Bartonian	Eocene	40.8964	-5.6
Cramwinkel et al. (2018)	ODP 959	3.63	-2.74	0.749738	30.0438		Bartonian	Eocene	40.9592	-5.6
Cramwinkel et al. (2018)	ODP 959	3.63	-2.74	0.736481	29.5138		Bartonian	Eocene	41.0561	-5.6
Cramwinkel et al. (2018)	ODP 959	3.63	-2.74	0.729236	29.2202		Bartonian	Eocene	41.1497	-5.6
Cramwinkel et al. (2018)	ODP 959	3.63	-2.74	0.750379	30.0692		Lutetian	Eocene	41.2184	-5.6
Cramwinkel et al. (2018)	ODP 959	3.63	-2.74	0.760602	30.4712		Lutetian	Eocene	41.3965	-5.6
Cramwinkel et al. (2018)	ODP 959	3.63	-2.74	0.758465	30.3876		Lutetian	Eocene	41.5621	-5.6
Cramwinkel et al. (2018)	ODP 959	3.63	-2.74	0.732353	29.3469		Lutetian	Eocene	41.6884	-5.6
Cramwinkel et al. (2018)	ODP 959	3.63	-2.74	0.767812	30.7514		Lutetian	Eocene	41.9175	-5.6
Cramwinkel et al. (2018)	ODP 959	3.63	-2.74	0.804787	32.1486		Lutetian	Eocene	42.2864	-5.6
Cramwinkel et al. (2018)	ODP 959	3.63	-2.74	0.808616	32.2896		Lutetian	Eocene	42.4735	-5.6
Cramwinkel et al. (2018)	ODP 959	3.63	-2.74	0.797191	31.8669		Lutetian	Eocene	42.677	-5.6
Cramwinkel et al. (2018)	ODP 959	3.63	-2.74	0.791424	31.6512		Lutetian	Eocene	42.9445	-5.6
Cramwinkel et al. (2018)	ODP 959	3.63	-2.74	0.76393	30.6009		Lutetian	Eocene	43.043	-5.6
Cramwinkel et al. (2018)	ODP 959	3.63	-2.74	0.751212	30.1022		Lutetian	Eocene	43.0994	-5.6
Cramwinkel et al. (2018)	ODP 959	3.63	-2.74	0.769933	30.8334		Lutetian	Eocene	43.2248	-5.6
Cramwinkel et al. (2018)	ODP 959	3.63	-2.74	0.815639	32.5465		Lutetian	Eocene	43.4063	-5.6
Cramwinkel et al. (2018)	ODP 959	3.63	-2.74	0.809531	32.3232		Lutetian	Eocene	43.6168	-5.6
Cramwinkel et al. (2018)	ODP 959	3.63	-2.74	0.802732	32.0726		Lutetian	Eocene	43.8474	-5.6
Cramwinkel et al. (2018)	ODP 959	3.63	-2.74	0.801789	32.0377		Lutetian	Eocene	43.9855	-5.6
Cramwinkel et al. (2018)	ODP 959	3.63	-2.74	0.793867	31.7428		Lutetian	Eocene	44.1141	-5.6
Cramwinkel et al. (2018)	ODP 959	3.63	-2.74	0.820978	32.7403		Lutetian	Eocene	44.2302	-5.6
Cramwinkel et al. (2018)	ODP 959	3.63	-2.74	0.772428	30.9295		Lutetian	Eocene	44.3829	-5.6
Cramwinkel et al. (2018)	ODP 959	3.63	-2.74	0.781783	31.2871		Lutetian	Eocene	44.6059	-5.6
Cramwinkel et al. (2018)	ODP 959	3.63	-2.74	0.805089	32.1597		Lutetian	Eocene	45.0194	-5.6
Cramwinkel et al. (2018)	ODP 959	3.63	-2.74	0.786014	31.4474		Lutetian	Eocene	45.3542	-5.6
Cramwinkel et al. (2018)	ODP 959	3.63	-2.74	0.799107	31.9382		Lutetian	Eocene	45.6094	-5.6
Cramwinkel et al. (2018)	ODP 959	3.63	-2.74	0.80673	32.2202		Ypresian	Eocene	48.0525	-9.06
Cramwinkel et al. (2018)	ODP 959	3.63	-2.74	0.806277	32.2035		Ypresian	Eocene	48.3362	-9.06
Cramwinkel et al. (2018)	ODP 959	3.63	-2.74	0.819222	32.6767		Ypresian	Eocene	48.6215	-9.06
Cramwinkel et al. (2018)	ODP 959	3.63	-2.74	0.869458	34.4446		Ypresian	Eocene	48.959	-9.06
Cramwinkel et al. (2018)	ODP 959	3.63	-2.74	0.862005	34.1889		Ypresian	Eocene	49.3967	-9.06
Cramwinkel et al. (2018)	ODP 959	3.63	-2.74	0.867419	34.3749		Ypresian	Eocene	49.9447	-9.06
Cramwinkel et al. (2018)	ODP 959	3.63	-2.74	0.853626	33.8987		Ypresian	Eocene	49.9828	-9.06
Cramwinkel et al. (2018)	ODP 959	3.63	-2.74	0.852162	33.8477		Ypresian	Eocene	50.9429	-9.06
Cramwinkel et al. (2018)	ODP 959	3.63	-2.74	0.880118	34.8066		Ypresian	Eocene	50.9789	-9.06
Cramwinkel et al. (2018)	ODP 959	3.63	-2.74	0.876212	34.6745		Ypresian	Eocene	51.2568	-9.06
Cramwinkel et al. (2018)	ODP 959	3.63	-2.74	0.86866	34.4173		Ypresian	Eocene	51.6454	-9.06
Cramwinkel et al. (2018)	ODP 959	3.63	-2.74	0.874376	34.6121		Ypresian	Eocene	51.9256	-9.06
Cramwinkel et al. (2018)	ODP 959	3.63	-2.74	0.894181	35.2775		Ypresian	Eocene	52.1455	-9.06
Cramwinkel et al. (2018)	ODP 959	3.63	-2.74	0.870909	34.4941		Ypresian	Eocene	52.5131	-9.06
Cramwinkel et al. (2018)	ODP 959	3.63	-2.74	0.876546	34.6858		Ypresian	Eocene	52.6826	-9.06
Cramwinkel et al. (2018)	ODP 959	3.63	-2.74	0.83794	33.3478		Ypresian	Eocene	54.5163	-9.06
Cramwinkel et al. (2018)	ODP 959	3.63	-2.74	0.827547	32.977		Ypresian	Eocene	55.5709	-9.75
Cramwinkel et al. (2018)	ODP 959	3.63	-2.74	0.853226	33.8848		Ypresian	Eocene	55.635	-9.75
Cramwinkel et al. (2018)	ODP 959	3.63	-2.74	0.842716	33.5166		Thanetian	Paleocene	56.1337	-9.75
Cramwinkel et al. (2018)	ODP 959	3.63	-2.74	0.818484	32.6499		Thanetian	Paleocene	56.7739	-9.75
Cramwinkel et al. (2018)	ODP 959	3.63	-2.74	0.824912	32.8823		Thanetian	Paleocene	57.0661	-9.75
Cramwinkel et al. (2018)	ODP 959	3.63	-2.74	0.778844	31.1752		Thanetian	Paleocene	57.5802	-9.75
Cramwinkel et al. (2018)	ODP 959	3.63	-2.74	0.84863	33.7243		Ypresian	Eocene	55.6898	-9.75	Frieling et al., 2018
Cramwinkel et al. (2018)	ODP 959	3.63	-2.74	0.872902	34.562		Ypresian	Eocene	55.7144	-9.75	Frieling et al., 2018
Cramwinkel et al. (2018)	ODP 959	3.63	-2.74	0.883899	34.9339		Ypresian	Eocene	55.7341	-9.75	Frieling et al., 2018
Cramwinkel et al. (2018)	ODP 959	3.63	-2.74	0.887562	35.0568		Ypresian	Eocene	55.7514	-9.75	Frieling et al., 2018
Cramwinkel et al. (2018)	ODP 959	3.63	-2.74	0.878083	34.7378		Ypresian	Eocene	55.8604	-9.75	Frieling et al., 2018
Cramwinkel et al. (2018)	ODP 959	3.63	-2.74	0.908559	35.7514		Ypresian	Eocene	55.8732	-9.75	Frieling et al., 2018
Cramwinkel et al. (2018)	ODP 959	3.63	-2.74	0.903246	35.5771		Ypresian	Eocene	55.8792	-9.75	Frieling et al., 2018
Cramwinkel et al. (2018)	ODP 959	3.63	-2.74	0.907025	35.7012		Ypresian	Eocene	55.887	-9.75	Frieling et al., 2018
Cramwinkel et al. (2018)	ODP 959	3.63	-2.74	0.924528	36.2689		Ypresian	Eocene	55.893	-9.75	Frieling et al., 2018
Cramwinkel et al. (2018)	ODP 959	3.63	-2.74	0.959464	37.3707		Ypresian	Eocene	55.8999	-9.75	Frieling et al., 2018
Cramwinkel et al. (2018)	ODP 959	3.63	-2.74	0.960236	37.3947		Ypresian	Eocene	55.9107	-9.75	Frieling et al., 2018
Cramwinkel et al. (2018)	ODP 959	3.63	-2.74	0.959555	37.3736		Ypresian	Eocene	55.9216	-9.75	Frieling et al., 2018
Cramwinkel et al. (2018)	ODP 959	3.63	-2.74	0.954423	37.2143		Ypresian	Eocene	55.9285	-9.75	Frieling et al., 2018
Cramwinkel et al. (2018)	ODP 959	3.63	-2.74	0.958084	37.328		Ypresian	Eocene	55.9344	-9.75	Frieling et al., 2018
Cramwinkel et al. (2018)	ODP 959	3.63	-2.74	0.957223	37.3013		Ypresian	Eocene	55.9393	-9.75	Frieling et al., 2018
Cramwinkel et al. (2018)	ODP 959	3.63	-2.74	0.961224	37.4252		Ypresian	Eocene	55.9453	-9.75	Frieling et al., 2018
Cramwinkel et al. (2018)	ODP 959	3.63	-2.74	0.958175	37.3308		Ypresian	Eocene	55.9502	-9.75	Frieling et al., 2018
Cramwinkel et al. (2018)	ODP 959	3.63	-2.74	0.962288	37.4581		Ypresian	Eocene	55.967	-9.75	Frieling et al., 2018
Cramwinkel et al. (2018)	ODP 959	3.63	-2.74	0.963411	37.4927		Ypresian	Eocene	55.9679	-9.75	Frieling et al., 2018
Cramwinkel et al. (2018)	ODP 959	3.63	-2.74	0.967164	37.6082		Ypresian	Eocene	55.9699	-9.75	Frieling et al., 2018
Cramwinkel et al. (2018)	ODP 959	3.63	-2.74	0.965376	37.5532		Ypresian	Eocene	55.9709	-9.75	Frieling et al., 2018
Cramwinkel et al. (2018)	ODP 959	3.63	-2.74	0.958491	37.3406		Ypresian	Eocene	55.9798	-9.75	Frieling et al., 2018
Cramwinkel et al. (2018)	ODP 959	3.63	-2.74	0.965211	37.5482		Thanetian	Paleocene	55.9985	-9.75	Frieling et al., 2018
Cramwinkel et al. (2018)	ODP 959	3.63	-2.74	0.870162	34.4686		Thanetian	Paleocene	56.003	-9.75	Frieling et al., 2018
Cramwinkel et al. (2018)	ODP 959	3.63	-2.74	0.884011	34.9377		Thanetian	Paleocene	56.006	-9.75	Frieling et al., 2018
Cramwinkel et al. (2018)	ODP 959	3.63	-2.74	0.857907	34.0473		Thanetian	Paleocene	56.0069	-9.75	Frieling et al., 2018
Cramwinkel et al. (2018)	ODP 959	3.63	-2.74	0.863956	34.256		Thanetian	Paleocene	56.0089	-9.75	Frieling et al., 2018
Cramwinkel et al. (2018)	ODP 959	3.63	-2.74	0.8582	34.0575		Thanetian	Paleocene	56.0235	-9.75	Frieling et al., 2018
Cramwinkel et al. (2018)	ODP 959	3.63	-2.74	0.835803	33.2719		Thanetian	Paleocene	56.0259	-9.75	Frieling et al., 2018
Cramwinkel et al. (2018)	ODP 959	3.63	-2.74	0.846623	33.654		Thanetian	Paleocene	56.0277	-9.75	Frieling et al., 2018
Cramwinkel et al. (2018)	ODP 959	3.63	-2.74	0.836942	33.3124		Thanetian	Paleocene	56.0313	-9.75	Frieling et al., 2018
Cramwinkel et al. (2018)	ODP 959	3.63	-2.74	0.842014	33.4918		Thanetian	Paleocene	56.0387	-9.75	Frieling et al., 2018
Cramwinkel et al. (2018)	ODP 959	3.63	-2.74	0.826002	32.9215		Thanetian	Paleocene	56.0405	-9.75	Frieling et al., 2018
Cramwinkel et al. (2018)	ODP 959	3.63	-2.74	0.826262	32.9308		Thanetian	Paleocene	56.048	-9.75	Frieling et al., 2018
Cramwinkel et al. (2018)	ODP 959	3.63	-2.74	0.835388	33.2571		Thanetian	Paleocene	56.0572	-9.75	Frieling et al., 2018
Cramwinkel et al. (2018)	ODP 959	3.63	-2.74	0.845356	33.6095		Thanetian	Paleocene	56.0626	-9.75	Frieling et al., 2018
Cramwinkel et al. (2018)	ODP 959	3.63	-2.74	0.832804	33.1651		Thanetian	Paleocene	56.0676	-9.75	Frieling et al., 2018
Cramwinkel et al. (2018)	ODP 959	3.63	-2.74	0.831264	33.1101		Thanetian	Paleocene	56.0792	-9.75	Frieling et al., 2018
Cramwinkel et al. (2018)	ODP 959	3.63	-2.74	0.824555	32.8694		Thanetian	Paleocene	56.0891	-9.75	Frieling et al., 2018
Cramwinkel et al. (2018)	ODP 925			0.690952	27.6182		Rupelian	Oligocene	28.567	-0.77	Liu et al., 2009; Zhang et al., 2013
Cramwinkel et al. (2018)	ODP 925			0.727302	29.1413		Rupelian	Oligocene	29.2722	-0.77	Liu et al., 2009; Zhang et al., 2013
Cramwinkel et al. (2018)	ODP 925			0.721209	28.8914		Rupelian	Oligocene	29.2868	-0.77	Liu et al., 2009; Zhang et al., 2013
Cramwinkel et al. (2018)	ODP 925			0.754903	30.2477		Rupelian	Oligocene	30.0077	-0.77	Liu et al., 2009; Zhang et al., 2013
Cramwinkel et al. (2018)	ODP 925			0.68759	27.4733		Rupelian	Oligocene	30.5598	-0.77	Liu et al., 2009; Zhang et al., 2013
Cramwinkel et al. (2018)	ODP 925			0.740868	29.6903		Rupelian	Oligocene	30.5703	-0.77	Liu et al., 2009; Zhang et al., 2013
Cramwinkel et al. (2018)	ODP 925			0.758223	30.3781		Rupelian	Oligocene	30.7786	-0.77	Liu et al., 2009; Zhang et al., 2013
Cramwinkel et al. (2018)	ODP 925			0.753471	30.1914		Rupelian	Oligocene	31.1029	-0.77	Liu et al., 2009; Zhang et al., 2013
Cramwinkel et al. (2018)	ODP 925			0.733534	29.3948		Rupelian	Oligocene	31.724	-0.77	Liu et al., 2009; Zhang et al., 2013
Cramwinkel et al. (2018)	ODP 925			0.753272	30.1835		Rupelian	Oligocene	32.6848	-0.77	Liu et al., 2009; Zhang et al., 2013
Cramwinkel et al. (2018)	ODP 925			0.761319	30.4992		Rupelian	Oligocene	32.7761	-0.77	Liu et al., 2009; Zhang et al., 2013
Cramwinkel et al. (2018)	ODP 925			0.732123	29.3375		Rupelian	Oligocene	33.0351	-0.77	Liu et al., 2009; Zhang et al., 2013
Cramwinkel et al. (2018)	ODP 925			0.746482	29.9145		Rupelian	Oligocene	33.2723	-0.77	Liu et al., 2009; Zhang et al., 2013
Cramwinkel et al. (2018)	ODP 925			0.750614	30.0785		Rupelian	Oligocene	33.4566	-0.77	Liu et al., 2009; Zhang et al., 2013
Cramwinkel et al. (2018)	ODP 925			0.764238	30.6129		Rupelian	Oligocene	33.6377	-0.77	Liu et al., 2009; Zhang et al., 2013
Cramwinkel et al. (2018)	ODP 925			0.621843	24.4878		Rupelian	Oligocene	33.8013	-0.77	Liu et al., 2009; Zhang et al., 2013
Cramwinkel et al. (2018)	ODP 925			0.7427	29.7636		Priabonian	Eocene	35.699	-0.77	Liu et al., 2009; Zhang et al., 2013
Cramwinkel et al. (2018)	ODP 925			0.741082	29.6989		Priabonian	Eocene	35.7075	-0.77	Liu et al., 2009; Zhang et al., 2013
Cramwinkel et al. (2018)	ODP 925			0.708863	28.3785		Priabonian	Eocene	35.7526	-0.77	Liu et al., 2009; Zhang et al., 2013
Cramwinkel et al. (2018)	ODP 925			0.678738	27.0884		Priabonian	Eocene	35.8504	-0.77	Liu et al., 2009; Zhang et al., 2013
Cramwinkel et al. (2018)	ODP 925			0.772388	30.9279		Priabonian	Eocene	36.0019	-3.42	Liu et al., 2009; Zhang et al., 2013
Cramwinkel et al. (2018)	ODP 925			0.733731	29.4027		Priabonian	Eocene	36.24	-3.42	Liu et al., 2009; Zhang et al., 2013
Cramwinkel et al. (2018)	ODP 925			0.756041	30.2925		Priabonian	Eocene	36.4265	-3.42	Liu et al., 2009; Zhang et al., 2013
Cramwinkel et al. (2018)	ODP 925			0.722216	28.9329		Priabonian	Eocene	36.7439	-3.42	Liu et al., 2009; Zhang et al., 2013
Cramwinkel et al. (2018)	ODP 925			0.810102	32.3441		Priabonian	Eocene	37.0104	-3.42	Liu et al., 2009; Zhang et al., 2013
Cramwinkel et al. (2018)	ODP 925			0.726564	29.1111		Priabonian	Eocene	37.2474	-3.42	Liu et al., 2009; Zhang et al., 2013
Cramwinkel et al. (2018)	ODP 925			0.757752	30.3597		Priabonian	Eocene	37.5133	-3.42	Liu et al., 2009; Zhang et al., 2013
Cramwinkel et al. (2018)	ODP 925			0.83381	33.201		Bartonian	Eocene	38.0225	-3.42	Liu et al., 2009; Zhang et al., 2013
Cramwinkel et al. (2018)	ODP 925			0.76882	30.7904		Bartonian	Eocene	38.2721	-3.42	Liu et al., 2009; Zhang et al., 2013
Cramwinkel et al. (2018)	ODP 925			0.734609	29.4382		Bartonian	Eocene	38.3299	-3.42	Liu et al., 2009; Zhang et al., 2013
Cramwinkel et al. (2018)	ODP 925			0.788363	31.5361		Bartonian	Eocene	38.4898	-3.42	Liu et al., 2009; Zhang et al., 2013
Cramwinkel et al. (2018)	ODP 925			0.76982	30.829		Bartonian	Eocene	38.5359	-3.42	Liu et al., 2009; Zhang et al., 2013
Cramwinkel et al. (2018)	ODP 925			0.828691	33.018		Bartonian	Eocene	38.6912	-3.42	Liu et al., 2009; Zhang et al., 2013
Cramwinkel et al. (2018)	ODP 929	5.98	-43.74	0.728694	29.1981		Priabonian	Eocene	34.8627	-0.38	Liu et al., 2009; Inglis et al., 2015
Cramwinkel et al. (2018)	ODP 929	5.98	-43.74	0.747188	29.9426		Priabonian	Eocene	35.4796	-2.07	Liu et al., 2009; Inglis et al., 2015
Cramwinkel et al. (2018)	ODP 929	5.98	-43.74	0.741871	29.7305		Priabonian	Eocene	36.0734	-2.07	Liu et al., 2009; Inglis et al., 2015
Cramwinkel et al. (2018)	ODP 929	5.98	-43.74	0.668809	26.6507		Priabonian	Eocene	36.6435	-2.07	Liu et al., 2009; Inglis et al., 2015
Cramwinkel et al. (2018)	ODP 929	5.98	-43.74	0.697953	27.9177		Priabonian	Eocene	36.6979	-2.07	Liu et al., 2009; Inglis et al., 2015
Cramwinkel et al. (2018)	ODP 929	5.98	-43.74	0.71373	28.5817		Priabonian	Eocene	37.3109	-2.07	Liu et al., 2009; Inglis et al., 2015
Cramwinkel et al. (2018)	ODP 929	5.98	-43.74	0.78441	31.3867		Bartonian	Eocene	37.8349	-2.07	Liu et al., 2009; Inglis et al., 2015
Cramwinkel et al. (2018)	ODP 929	5.98	-43.74	0.721196	28.8908		Bartonian	Eocene	37.9368	-2.07	Liu et al., 2009; Inglis et al., 2015
Cramwinkel et al. (2018)	ODP 929	5.98	-43.74	0.756618	30.3151		Lutetian	Eocene	43.5205	-2.07	Liu et al., 2009; Inglis et al., 2015
Cramwinkel et al. (2018)	ODP 929	5.98	-43.74	0.783935	31.3688		Ypresian	Eocene	48.2837	-3.63	Liu et al., 2009; Inglis et al., 2015
Cramwinkel et al. (2018)	ODP 929	5.98	-43.74	0.853505	33.8945		Ypresian	Eocene	49.8402	-3.63	Liu et al., 2009; Inglis et al., 2015
Cramwinkel et al. (2018)	ODP 929	5.98	-43.74	0.792299	31.684		Ypresian	Eocene	52.9725	-3.63	Liu et al., 2009; Inglis et al., 2015
Cramwinkel et al. (2018)	ODP 929	5.98	-43.74	0.787512	31.504		Ypresian	Eocene	54.1241	-3.63	Liu et al., 2009; Inglis et al., 2015
Cramwinkel et al. (2018)	IB10B Core, Dahomey Basin			0.873524	34.5832		Ypresian	Eocene	55.4571	-7.63	Frieling et al., 2017
Cramwinkel et al. (2018)	IB10B Core, Dahomey Basin			0.847648	33.6898		Ypresian	Eocene	55.5493	-7.63	Frieling et al., 2017
Cramwinkel et al. (2018)	IB10B Core, Dahomey Basin			0.816794	32.5884		Ypresian	Eocene	55.5661	-7.63	Frieling et al., 2017
Cramwinkel et al. (2018)	IB10B Core, Dahomey Basin			0.822414	32.7922		Ypresian	Eocene	55.5996	-7.63	Frieling et al., 2017
Cramwinkel et al. (2018)	IB10B Core, Dahomey Basin			0.819765	32.6963		Ypresian	Eocene	55.6214	-7.63	Frieling et al., 2017
Cramwinkel et al. (2018)	IB10B Core, Dahomey Basin			0.828027	32.9942		Ypresian	Eocene	55.6415	-7.63	Frieling et al., 2017
Cramwinkel et al. (2018)	IB10B Core, Dahomey Basin			0.811194	32.3841		Ypresian	Eocene	55.6583	-7.63	Frieling et al., 2017
Cramwinkel et al. (2018)	IB10B Core, Dahomey Basin			0.829417	33.044		Ypresian	Eocene	55.6835	-7.63	Frieling et al., 2017
Cramwinkel et al. (2018)	IB10B Core, Dahomey Basin			0.84093	33.4536		Ypresian	Eocene	55.7086	-7.63	Frieling et al., 2017
Cramwinkel et al. (2018)	IB10B Core, Dahomey Basin			0.863627	34.2446		Ypresian	Eocene	55.7589	-7.63	Frieling et al., 2017
Cramwinkel et al. (2018)	IB10B Core, Dahomey Basin			0.862995	34.2228		Ypresian	Eocene	55.7757	-7.63	Frieling et al., 2017
Cramwinkel et al. (2018)	IB10B Core, Dahomey Basin			0.851365	33.8179		Ypresian	Eocene	55.7908	-7.63	Frieling et al., 2017
Cramwinkel et al. (2018)	IB10B Core, Dahomey Basin			0.86812	34.3986		Ypresian	Eocene	55.8076	-7.63	Frieling et al., 2017
Cramwinkel et al. (2018)	IB10B Core, Dahomey Basin			0.822653	32.8008		Ypresian	Eocene	55.8488	-7.63	Frieling et al., 2017
Cramwinkel et al. (2018)	IB10B Core, Dahomey Basin			0.897076	35.3723		Ypresian	Eocene	55.8625	-7.63	Frieling et al., 2017
Cramwinkel et al. (2018)	IB10B Core, Dahomey Basin			0.937325	36.6769		Ypresian	Eocene	55.8832	-7.63	Frieling et al., 2017
Cramwinkel et al. (2018)	IB10B Core, Dahomey Basin			0.900065	35.4717		Ypresian	Eocene	55.89	-7.63	Frieling et al., 2017
Cramwinkel et al. (2018)	IB10B Core, Dahomey Basin			0.922897	36.2164		Ypresian	Eocene	55.9313	-7.63	Frieling et al., 2017
Cramwinkel et al. (2018)	IB10B Core, Dahomey Basin			0.94611	36.9544		Ypresian	Eocene	55.9519	-7.63	Frieling et al., 2017
Cramwinkel et al. (2018)	IB10B Core, Dahomey Basin			0.88004	34.8033		Ypresian	Eocene	55.9588	-7.63	Frieling et al., 2017
Cramwinkel et al. (2018)	IB10B Core, Dahomey Basin			0.88762	35.0586		Ypresian	Eocene	55.9725	-7.63	Frieling et al., 2017
Cramwinkel et al. (2018)	IB10B Core, Dahomey Basin			0.881239	34.8443		Ypresian	Eocene	55.9863	-7.63	Frieling et al., 2017
Cramwinkel et al. (2018)	IB10B Core, Dahomey Basin			0.814262	32.4963		Thanetian	Paleocene	56.0587	-7.63	Frieling et al., 2017
Cramwinkel et al. (2018)	IB10B Core, Dahomey Basin			0.822923	32.8105		Thanetian	Paleocene	56.1819	-7.63	Frieling et al., 2017
Cramwinkel et al. (2018)	IB10B Core, Dahomey Basin			0.857869	34.046		Thanetian	Paleocene	56.2348	-7.63	Frieling et al., 2017
Cramwinkel et al. (2018)	IB10B Core, Dahomey Basin			0.819598	32.6903		Thanetian	Paleocene	56.4108	-7.63	Frieling et al., 2017
Cramwinkel et al. (2018)	IB10B Core, Dahomey Basin			0.868653	34.4171		Thanetian	Paleocene	56.4695	-7.63	Frieling et al., 2017
Cramwinkel et al. (2018)	IB10B Core, Dahomey Basin			0.831395	33.1148		Thanetian	Paleocene	56.5517	-7.63	Frieling et al., 2017
Cramwinkel et al. (2018)	IB10B Core, Dahomey Basin			0.763659	30.5899		Thanetian	Paleocene	56.763	-7.63	Frieling et al., 2017
Cramwinkel et al. (2018)	IB10B Core, Dahomey Basin			0.823713	32.8391		Thanetian	Paleocene	56.851	-7.63	Frieling et al., 2017
Cramwinkel et al. (2018)	IB10B Core, Dahomey Basin			0.812961	32.4473		Thanetian	Paleocene	56.9038	-7.63	Frieling et al., 2017
Cramwinkel et al. (2018)	IB10B Core, Dahomey Basin			0.846428	33.6471		Thanetian	Paleocene	56.939	-7.63	Frieling et al., 2017
Cramwinkel et al. (2018)	IB10B Core, Dahomey Basin			0.847033	33.6661		Thanetian	Paleocene	56.9977	-7.63	Frieling et al., 2017
Cramwinkel et al. (2018)	IB10B Core, Dahomey Basin			0.834912	33.2373		Thanetian	Paleocene	57.1151	-7.63	Frieling et al., 2017
Cramwinkel et al. (2018)	IB10B Core, Dahomey Basin			0.854022	33.9098		Thanetian	Paleocene	57.2325	-7.63	Frieling et al., 2017
Cramwinkel et al. (2018)	IB10B Core, Dahomey Basin			0.845714	33.6221		Thanetian	Paleocene	57.2911	-7.63	Frieling et al., 2017
Cramwinkel et al. (2018)	IB10B Core, Dahomey Basin			0.85674	34.0069		Thanetian	Paleocene	57.4672	-7.63	Frieling et al., 2017
Cramwinkel et al. (2018)	IB10B Core, Dahomey Basin			0.85911	34.0889		Thanetian	Paleocene	57.5846	-7.63	Frieling et al., 2017
Cramwinkel et al. (2018)	IB10B Core, Dahomey Basin			0.851681	33.831		Thanetian	Paleocene	57.702	-7.63	Frieling et al., 2017
Douglas et al., 2014	Seymour Island			0.475	16.5	14.5	Priabonian	Eocene	34	-69.36
Douglas et al., 2014	Seymour Island			0.493	17.6	10.7	Priabonian	Eocene	37.4	-70.62
Douglas et al., 2014	Seymour Island			0.434	13.8	5.3	Priabonian	Eocene	37.5	-70.62
Douglas et al., 2014	Seymour Island			0.663	26.4	14.9	Bartonian	Eocene	38	-70.62
Douglas et al., 2014	Seymour Island			0.499	17.9	12.5	Bartonian	Eocene	38.4	-70.62
Douglas et al., 2014	Seymour Island			0.531	19.8	13	Bartonian	Eocene	39.5	-70.62
Douglas et al., 2014	Seymour Island			0.486	17.2	8.1	Bartonian	Eocene	40.5	-70.62
Douglas et al., 2014	Seymour Island			0.486	17.2	8.1	Bartonian	Eocene	41	-70.62
Douglas et al., 2014	Seymour Island			0.57	21.9	14.1	Lutetian	Eocene	41.6	-70.62
Douglas et al., 2014	Seymour Island			0.602	23.5	17.7	Lutetian	Eocene	41.8	-70.62
Douglas et al., 2014	Seymour Island			0.531	19.8	10.4	Lutetian	Eocene	41.9	-70.62
Douglas et al., 2014	Seymour Island			0.612	24	21	Lutetian	Eocene	42	-70.62
Douglas et al., 2014	Seymour Island			0.563	21.5	13.7	Lutetian	Eocene	32	-70.62
Douglas et al., 2014	Seymour Island			0.582	22.5	17.5	Lutetian	Eocene	43.5	-70.62
Douglas et al., 2014	Seymour Island			0.567	21.7	16.5	Lutetian	Eocene	43.8	-70.62
Douglas et al., 2014	Seymour Island			0.543	20.4	13.9	Lutetian	Eocene	44	-70.62
Douglas et al., 2014	Seymour Island			0.547	20.7	17.3	Lutetian	Eocene	44	-70.62
Douglas et al., 2014	Seymour Island			0.555	21.1	13.1	Lutetian	Eocene	45	-70.62
Cavalheiro et al., 2021	ODP 692			0.689466	27.5543	29.3803	Hauterivian	Early Cretaceous	132	-51.72
Cavalheiro et al., 2021	ODP 692			0.682104	27.2354	28.9473	Hauterivian	Early Cretaceous	132	-51.72
Cavalheiro et al., 2021	ODP 692			0.719893	28.8371	31.1702	Hauterivian	Early Cretaceous	132	-51.72
Cavalheiro et al., 2021	ODP 692			0.681243	27.1979	28.8966	Hauterivian	Early Cretaceous	132	-51.72
Cavalheiro et al., 2021	ODP 692			0.675631	26.9521	28.5665	Hauterivian	Early Cretaceous	132	-51.72
Cavalheiro et al., 2021	ODP 692			0.694356	27.7642	29.668	Hauterivian	Early Cretaceous	132	-51.72
Cavalheiro et al., 2021	ODP 692			0.673085	26.84	28.4167	Hauterivian	Early Cretaceous	132	-51.72
Cavalheiro et al., 2021	ODP 692			0.66058	26.2829	27.6812	Hauterivian	Early Cretaceous	132	-51.72
Cavalheiro et al., 2021	ODP 692			0.658591	26.1933	27.5642	Hauterivian	Early Cretaceous	132	-51.72
Cavalheiro et al., 2021	ODP 692			0.729176	29.2177	31.7162	Hauterivian	Early Cretaceous	132	-51.72
Cavalheiro et al., 2021	ODP 692			0.706474	28.2782	30.3808	Valanginian	Early Cretaceous	134	-51.72
Cavalheiro et al., 2021	ODP 692			0.71786	28.7531	31.0506	Valanginian	Early Cretaceous	134	-51.72
Cavalheiro et al., 2021	ODP 692			0.685568	27.3858	29.151	Valanginian	Early Cretaceous	134	-51.72
Cavalheiro et al., 2021	ODP 692			0.71116	28.4746	30.6565	Valanginian	Early Cretaceous	134	-51.72
Cavalheiro et al., 2021	ODP 692			0.688589	27.5165	29.3288	Valanginian	Early Cretaceous	134	-51.72
Cavalheiro et al., 2021	ODP 692			0.697184	27.885	29.8344	Valanginian	Early Cretaceous	134	-51.72
Cavalheiro et al., 2021	ODP 692			0.721447	28.9012	31.2616	Valanginian	Early Cretaceous	134	-51.72
Cavalheiro et al., 2021	ODP 692			0.627766	24.7694	25.7509	Valanginian	Early Cretaceous	134	-51.72
Cavalheiro et al., 2021	ODP 692			0.663622	26.4194	27.8601	Valanginian	Early Cretaceous	134	-51.72
Cavalheiro et al., 2021	ODP 692			0.698571	27.944	29.9159	Valanginian	Early Cretaceous	134	-51.72
Cavalheiro et al., 2021	ODP 692			0.660849	26.295	27.697	Valanginian	Early Cretaceous	134	-51.72
Cavalheiro et al., 2021	ODP 692			0.668655	26.6438	28.1562	Valanginian	Early Cretaceous	134	-51.72
Cavalheiro et al., 2021	ODP 692			0.68668	27.434	29.2165	Valanginian	Early Cretaceous	134	-51.72
Cavalheiro et al., 2021	ODP 692			0.683499	27.2961	29.0294	Valanginian	Early Cretaceous	134	-51.72
Cavalheiro et al., 2021	ODP 692			0.701956	28.0876	30.1151	Valanginian	Early Cretaceous	134	-51.72
Cavalheiro et al., 2021	ODP 692			0.681656	27.2159	28.9209	Valanginian	Early Cretaceous	134	-51.72
Cavalheiro et al., 2021	ODP 692			0.730897	29.2877	31.8174	Valanginian	Early Cretaceous	134	-51.72
Cavalheiro et al., 2021	ODP 692			0.678633	27.0838	28.7431	Valanginian	Early Cretaceous	134	-51.72
Cavalheiro et al., 2021	ODP 692			0.70282	28.1241	30.1659	Valanginian	Early Cretaceous	134	-51.72
Cavalheiro et al., 2021	ODP 692			0.696606	27.8603	29.8004	Valanginian	Early Cretaceous	134	-51.72
Cavalheiro et al., 2021	ODP 692			0.734101	29.4177	32.0059	Valanginian	Early Cretaceous	134	-51.72
Cavalheiro et al., 2021	ODP 692			0.696713	27.8649	29.8067	Valanginian	Early Cretaceous	134	-51.72
Cavalheiro et al., 2021	ODP 692			0.716098	28.6801	30.947	Valanginian	Early Cretaceous	134	-51.72
Cavalheiro et al., 2021	ODP 692			0.731854	29.3266	31.8738	Valanginian	Early Cretaceous	134	-51.72
Cavalheiro et al., 2021	ODP 692			0.742694	29.7634	32.5114	Valanginian	Early Cretaceous	134	-51.72
Cavalheiro et al., 2021	ODP 692			0.732668	29.3597	31.9217	Valanginian	Early Cretaceous	134	-51.72
Cavalheiro et al., 2021	ODP 692			0.740887	29.691	32.4051	Valanginian	Early Cretaceous	134	-51.72
Cavalheiro et al., 2021	ODP 692			0.729804	29.2433	31.7532	Valanginian	Early Cretaceous	134	-51.72
Cavalheiro et al., 2021	ODP 692			0.688653	27.5192	29.3325	Valanginian	Early Cretaceous	134	-51.72
Cavalheiro et al., 2021	ODP 692			0.709301	28.3968	30.5471	Valanginian	Early Cretaceous	134	-51.72
Cavalheiro et al., 2021	ODP 692			0.735009	29.4544	32.0594	Valanginian	Early Cretaceous	134	-51.72
Cavalheiro et al., 2021	ODP 692			0.723466	28.9842	31.3804	Valanginian	Early Cretaceous	134	-51.72
Cavalheiro et al., 2021	ODP 692			0.741852	29.7297	32.4619	Valanginian	Early Cretaceous	134	-51.72
Cavalheiro et al., 2021	ODP 692			0.727252	29.1392	31.6031	Valanginian	Early Cretaceous	134	-51.72
Cavalheiro et al., 2021	ODP 692			0.755452	30.2694	33.2619	Valanginian	Early Cretaceous	134	-51.72
Cavalheiro et al., 2021	ODP 692			0.70054	28.0276	30.0318	Valanginian	Early Cretaceous	134	-51.72
Cavalheiro et al., 2021	ODP 692			0.765114	30.6469	33.8302	Valanginian	Early Cretaceous	134	-51.72
Cavalheiro et al., 2021	ODP 692			0.730895	29.2877	31.8174	Valanginian	Early Cretaceous	134	-51.72

## Sheet: Marine reptiles
Location	Stage	Sample	Taxa	Remarqs	Paleolatitude	δ18Op (‰VSMOW)	δ18Op 2SE		δ18Osw (‰VSMOW)	δ18Osw 2SE	Equation	Source
Chassiron	Tithonien	BG16	Plesiochelidae		30.1	21.6	0.14		0.2734	1.88132	Barrick et al (1999) recalculated	Billon-Bruyat et al.(2005)
Chassiron	Tithonien	BG10	Plesiochelidae		30.1	21.9	0.14		0.5716	1.89512	Barrick et al (1999) recalculated	Billon-Bruyat et al.(2005)
Solnhofen	Tithonien	BG65	Plesiochelidae		34.4	21.4	0.14		0.0746	1.87212	Barrick et al (1999) recalculated	Billon-Bruyat et al.(2005)
Gove county, Kansas	Santonian	usnm 11652	Protostega		42.8	17.914	0.221052		-3.39048	1.7886	Barrick et al (1999) recalculated	Coulson et al. (2011)
Gove county, Kansas	Santonian	usnm 11651	Protostega		42.8	17.106	0.917575		-4.19364	2.41174	Barrick et al (1999) recalculated	Coulson et al. (2011)
Kansas, Niobrara formation	Late Coniacian earliest Campanian	GR 1	Protostega		43	18.15	0.20232		-3.1559	1.7817	Barrick et al (1999) recalculated	Coulson et al. (2011)
Logan County, Kansas	Late Coniacian earliest Campanian	vp 13448	Protostega		42.96	18.045	0.15		-3.26027	1.72727	Barrick et al (1999) recalculated	Coulson et al. (2011)
Graham County, Kansas	Late Coniacian earliest Campanian	vp 2158	Protostega		43	18.81	0.34176		-2.49986	1.94425	Barrick et al (1999) recalculated	Coulson et al. (2011)
Logan County, Kansas	Santonian	usnm 12007	Toxochelys		42.96	18.7417	0.151474		-2.56778	1.76071	Barrick et al (1999) recalculated	Coulson et al. (2011)
Kansas, Niobrara formation	Late Coniacian earliest Campanian	GR2a	Toxochelys		43	17.3333	0.24037		-3.96767	1.7802	Barrick et al (1999) recalculated	Coulson et al. (2011)
Kansas, Niobrara formation	Late Coniacian earliest Campanian	GR 2b	Toxochelys		43	17.4633	0.124544		-3.83845	1.67638	Barrick et al (1999) recalculated	Coulson et al. (2011)
Kansas, Niobrara formation	Late Coniacian earliest Campanian	GR 2e	Toxochelys		43	18.7633	0.310125		-2.54625	1.91211	Barrick et al (1999) recalculated	Coulson et al. (2011)
Kansas, Niobrara formation	Late Coniacian earliest Campanian	GR 2c2	Toxochelys		43	17.44	0.130128		-3.86164	1.6806	Barrick et al (1999) recalculated	Coulson et al. (2011)
Kansas, Niobrara formation	Late Coniacian earliest Campanian	GR 2d2	Toxochelys		43	18.08	0.04		-3.22548	1.6246	Barrick et al (1999) recalculated	Coulson et al. (2011)
Kansas, Niobrara formation	Late Coniacian earliest Campanian	GR 2f2	Toxochelys		43	17.43	0.321455		-3.87158	1.86152	Barrick et al (1999) recalculated	Coulson et al. (2011)
Logan County, Kansas	Late Coniacian earliest Campanian	vp 2157	Toxochelys		42.96	18.515	0.07		-2.79309	1.67305	Barrick et al (1999) recalculated	Coulson et al. (2011)
Kansas, Niobrara formation	Late Coniacian earliest Campanian	rox 1	Toxochelys		43	19.0967	0.0437163		-2.21491	1.67489	Barrick et al (1999) recalculated	Coulson et al. (2011)
Gove county, Kansas	Late Coniacian earliest Campanian	vp 13449	Toxochelys		42.8	18.84	0.14		-2.47004	1.75436	Barrick et al (1999) recalculated	Coulson et al. (2011)
Logan County, Kansas	Santonian	usnm 12008	Ctenochelys		42.96	19.6333	0.135712		-1.68147	1.78679	Barrick et al (1999) recalculated	Coulson et al. (2011)
Dallas County, Alabama	Late Coniacian earliest Campanian	PV993.2.173	Toxochelys		33.07	20.3367	0.298068		-0.982353	1.97305	Barrick et al (1999) recalculated	Coulson et al. (2011)
Greene County, Alabama	Late Coniacian earliest Campanian	PV994.2.76	Toxochelys		33.77	20.4333	0.253333		-0.886267	1.93509	Barrick et al (1999) recalculated	Coulson et al. (2011)
Greene County, Alabama	Late Coniacian earliest Campanian	PV994.2.68	Toxochelys		33.77	19.4733	0.17901		-1.84051	1.82047	Barrick et al (1999) recalculated	Coulson et al. (2011)
Dallas County, Alabama	Late Coniacian earliest Campanian	PV988.20.75.5	Toxochelys		33.07	20.15	0.147422		-1.1679	1.82166	Barrick et al (1999) recalculated	Coulson et al. (2011)
Greene County, Alabama	Late Coniacian earliest Campanian	PV994.2.69	Protostega		33.77	20.47	0.06		-0.84982	1.7535	Barrick et al (1999) recalculated	Coulson et al. (2011)
Alabama, Mooreville Formation	Late Coniacian earliest Campanian	rmm 1618	Protostega		33	20.0967	0.153768		-1.22091	1.82522	Barrick et al (1999) recalculated	Coulson et al. (2011)
Alabama, Mooreville Formation	Late Coniacian earliest Campanian	rmm 1671	Protostega		33	20.2133	0.179753		-1.10495	1.85522	Barrick et al (1999) recalculated	Coulson et al. (2011)
Alabama, Mooreville Formation	Late Coniacian earliest Campanian	rmm 1306	Protostega		33	20.1967	0.227664		-1.12151	1.89987	Barrick et al (1999) recalculated	Coulson et al. (2011)
Alabama, Mooreville Formation	Late Coniacian earliest Campanian	rmm 1916	Protostega		33	19.5167	0.122384		-1.79743	1.76879	Barrick et al (1999) recalculated	Coulson et al. (2011)
Alabama, Mooreville Formation	Late Coniacian earliest Campanian	rmm 1541	Protostega		33	20.3833	0.129786		-0.935967	1.81567	Barrick et al (1999) recalculated	Coulson et al. (2011)
Alabama, Mooreville Formation	Late Coniacian earliest Campanian	rmm 2255	Protostega		33	19.2333	0.148922		-2.07907	1.78091	Barrick et al (1999) recalculated	Coulson et al. (2011)
Alabama, Mooreville Formation	Late Coniacian earliest Campanian	rmm 2542	Toxochelys		33	20.8967	0.202759		-0.425713	1.90846	Barrick et al (1999) recalculated	Coulson et al. (2011)
Alabama, Mooreville Formation	Late Coniacian earliest Campanian	rmm 2749	Chelosphargis		33	20.375	0.206865		-0.94425	1.88836	Barrick et al (1999) recalculated	Coulson et al. (2011)
Alabama, Mooreville Formation	Late Coniacian earliest Campanian	rmm 1789	Ctenochelys		33	19.6867	0.17901		-1.62845	1.83029	Barrick et al (1999) recalculated	Coulson et al. (2011)
Alabama, Mooreville Formation	Late Coniacian earliest Campanian	rmm 3036	Ctenochelys		33	21	0.156205		-0.323	1.86908	Barrick et al (1999) recalculated	Coulson et al. (2011)
Dallas County, Alabama	Late Coniacian earliest Campanian	PV993.2.247	Ctenochelys		33.07	20.29	0.18		-1.02874	1.85898	Barrick et al (1999) recalculated	Coulson et al. (2011)
Greene County, Alabama	Late Coniacian earliest Campanian	PV944.2.82	Thinochelys		33.77	19.265	0.19		-2.04759	1.82131	Barrick et al (1999) recalculated	Coulson et al. (2011)
Niobrara County, Wyoming	Campanian	usnm 18252	Toxochelys		47.66	16.73	0.203961		-4.56738	1.71793	Barrick et al (1999) recalculated	Coulson et al. (2011)
Wyoming, Pierre Shale formation	Campanian	usnm 11064	Toxochelys		47	16.8	0.095219		-4.4978	1.61807	Barrick et al (1999) recalculated	Coulson et al. (2011)
Belgium/Netherland	Maastrichtien	NHMM 2008 137 I	Allopleuron hoffmanni	Compact bones	40.21	20.525	0.189297		-0.79515	1.8786	Barrick et al (1999) recalculated	van Baal et al.(2013)
Belgium/Netherland	Maastrichtien	NHMM 2008 137 V	Allopleuron hoffmanni	Spongy bones	40.21	19.8667	0.751295		-1.44953	2.38109	Barrick et al (1999) recalculated	van Baal et al.(2013)

## Sheet: Stage means
			Bivalve, ammonite or Foram D47 T (°C)			Bivalve, ammonite or Foram 18Osw (‰VSMOW)			Tex 86 H (°C)			Belemnites D47 T (°C)			Belemnites 18Osw (‰VSMOW)			Marine vertebrate 18Osw (‰VSMOW)										T D47 biv		d18sw (D47 biv)		T tex 86		T D47 belemnites		d18sw (D47 belemnites)		d18sw (Turtles)
Location	Paleolatitude	number of data	Mean	Max	Min	Mean	Max	Min	Mean	Max	Min	Mean	Max	Min	Mean	Max	Min	Mean	Max	Min								err sup	err min	err sup	err min	err sup	err min	err sup	err min	err sup	err min	err sup	err min
Rupelian
Mississippi	25	1	29.4	32.5	26.4	1.92515																						3.1	3
ODP 959	-3.5	23							26.3633	27.269	25.1358																					0.905739	1.22746
ODP 925	-1	16							29.2588	30.6129	24.4878																					1.35413	4.77097
Priabonian
Seymour Island	-70	9+3	12.7778	16.9	9.2	-0.532133	0.436465	-1.29673	15.9667	17.6	13.8																	4.12222	3.57778	0.968599	0.764595	1.63333	2.16667
Tanzania Driling project	-20	1	29.7	32.9	26.6	-0.130796																						3.2	3.1
ODP 959	-5	15							28.1905	29.581	27.1375																					1.39053	1.05297
ODP 925+ PDP 929	-2	17							29.313	32.3441	26.6507																					3.03106	2.66234
Bartonian
Seymour Island	-71	4+5	12.6	14.6	10.9	-2.69407	-2.2899	-3.36049	19.7	26.4	17.2																	2	1.7	0.404165	0.666421	6.7	2.5
Java	-6	2	35.65	36.3	35	-0.771212	-0.63469	-0.907734																				0.65	0.65	0.136522	0.136522
ODP 959	-5.5	26							30.0284	33.0078	28.0193																					2.97936	2.00914
ODP 925	-3.5	6							31.4688	33.201	29.4382																					1.73222	2.03058
ODP 929	-2	2							30.1388	31.3867	28.8908																					1.24795	1.24795
Lutetian
Hampshire basin	45	1	23.2	25.8	20.7	-4.11058																						2.6	2.5
Balegem sandpit	45	1	27	29.7	24.4	-0.299177																						2.7	2.6
Isle of Wight	44	1	30.4	32.5	28.4	-1.77154																						2.1	2
Seymour Island	-70	10+10	15.5	21	12.5	-1.09063	0.374166	-1.98361	21.71	24	19.8																	5.5	3	1.46479	0.892987	2.29	1.91
ODP 959	-5.5	23							31.3802	32.7403	29.3469																					1.36012	2.03328
ODP 929	-2	1							30.3151
Ypresian
Kutch	5	3	32.8667	35.1	30.4	-1.11558	-0.616698	-1.65154																				2.23333	2.46667	0.498883	0.535962
Belgium	45	3	26.5333	31.1	20	-2.18969	-1.45257	-2.64918																				4.56667	6.53333	0.737119	0.459488
Paris Basin	43	1	18.5	21.3	15.8	-4.11887																						2.8	2.7
Hatchetigbee	29	10 +6	26.47	31.4	20.8	-1.66347	0.0284793	-3.84392	29.609	30.7939	27.6089																	4.93	5.67	1.69194	2.18045	1.18492	2.00011
West Siberian Sea	51	31							23.4742	27.8	19																					4.32581	4.47419
ODP 1172	-57.5	37							28.7681	32.0753	24.5593																					3.30715	4.2088
Waipara River	-47	7							29.609	30.7939	27.6089																					1.18492	2.00011
ACEX 302-4A	78	38							20.7195	24.0587	13.8413																					3.33914	6.87829
ODP 959	-9.5	40							35.3384	37.6082	32.2035																					2.26976	3.13494
ODP 929	-3.5	4							32.1128	33.8945	31.3688																					1.78167	0.744025
Dahomey Basin	-7.5	22							34.2322	36.9544	32.3841																					2.7222	1.8481
Thanetian
ODP 959	-9.75	21							33.5778	37.5482	31.1752																					3.97044	2.40256
Dahomey Basin	-7.5	17							33.2624	34.4171	30.5899																					1.15472	2.67248
West Siberia	50	6							18.2333	21.5	16.8																					3.26667	1.43333
Bass River	35.5	21							30.0228	30.9702	29.1188																					0.947373	0.904024
Wilson Lake	35.75	10							28.02	29.4334	26.1769																					1.41336	1.84309
Selandian
West Siberia	50	2							18.4	18.7	18.1																					0.3	0.3
Danian
Moscow Landing	33	4	16.7021	18.1937	15.0178	-0.872915	-0.359839	-1.66449																				1.49155	1.6843	0.513076	0.791573
Seymour Island	-64.5	4	4.12027	7.8771	0.660336	-2.81032	-2.25312	-3.62033																				3.75683	3.45993	0.557199	0.810006
Maastrichtian
Burches Ferry	33	9	14.2691	18.2491	9.55766	-1.80484	0.157604	-2.92629				15.3398	20.8345	10.324	-1.38073	-0.274434	-2.12612											3.97994	4.71148	1.96244	1.12145			5.49475	5.01582	1.1063	0.745388
Marengo County + Moscow landing	34	11	15.5196	24.3986	6.6	-0.986555	1.66534	-3.05285																				8.87904	8.91956	2.6519	2.06629
New Jersey	37.5	4	6.73681	13.6443	2.89877	-2.81393	-0.575401	-4.29507																				6.90749	3.83804	2.23853	1.48114
16002 Kidder County , Shell Buttes	50	4	9.35267	12.136	6.81145	-7.29893	-4.00748	-8.60569																				2.78329	2.54123	3.29145	1.30676
6113 Corson County+A500 Dewey County + A4654 Corson county	49	6	7.70917	13.4507	5.64759	-4.83661	-2.46666	-6.77469																				5.74157	2.06158	2.36995	1.93808
16216 Larimer	45	1	15.8536	19.0979	12.6093	-4.16521																						3.2443	3.2443
A120 Emmons+A131 Eastern Sioux	49.5	3	8.45198	11.1379	4.86394	-4.44779	-3.46445	-5.95258																				2.68593	3.58804	0.983337	1.50479
D7904 Elbert county	43.5	2	6.45726	7.73782	5.1767	-7.41155	-6.99612	-7.82697																				1.28056	1.28056	0.415425	0.415425
Colorado Springs	43	3	12.3723	15.8273	10.0852	-2.62461	-1.93317	-3.21808																				3.45499	2.28713	0.69144	0.593472
Seymour Island	-64.5	48	8.1062	15.0385	-2.79093	-1.8636	0.523843	-4.05303																				6.93229	10.8971	2.38745	2.18943
Aderet borehole 1+PAMA quarry	13	58							27.8904	30.0794	25.1613																					2.18901	2.7291
Brazos River+Shuqualak	35	11							30.1109	31.2114	28.3211																					1.10043	1.78981
Meirs Farm	37.5	6							25.9271	28.2702	24.0667																					2.3431	1.86036
FL 533	74.5	4							18.5922	19.3728	17.0824																					0.780644	1.50977
Belgium	40	1																-0.79515
Campanian
Coon Creek + County Lake + Owl Creek	36.5	6	15.3459	19.1818	10.3014	-2.08208	-1.01179	-3.60043																				3.83587	5.04452	1.0703	1.51834
Moscow Landing+ Sumter County	34	7	16.7431	21.5292	10.0831	-1.34458	0.0847925	-3.84994																				4.78611	6.65996	1.42937	2.50536
Safford	33.5	3	23.3613	27.1761	17.5363	-0.531358	1.04174	-1.75735																				3.81485	5.82495	1.5731	1.22599
Shopton Roadcut	33	2	14.233	14.4082	14.0578	-1.92835	-1.83364	-2.02307																				0.175178	0.175178	0.0947153	0.0947153
D4153 Sandoval County	40	1	20.6715	24.4299	16.9131	-1.27799																						3.75839	3.75839
Shuqualak	34.5	34							32.3244	35.5361	28.9564																					3.21173	3.36801
Aderet borehole 1+PAMA quarry	12.5	29							28.5585	32.1863	23.0382																					3.62783	5.52026
DSDP 327	-58	16							25.0919	31.31	16.21																					6.21813	8.88187
DSDP 511	-57.5	41							27.5763	30.57	19.73																					2.99366	7.84634
East Wyoming	47	2																-4.53259
Kristinstad basin	de Winter et al., 2021		MA	WM	CM	MA	WM	CM
R. diluvianum	46.25	121	24.6	29.2	19.6	0.301568	0.83296	-0.29934																				4.6	5	0.531392	0.600909
A. incurve	46.25	115	16.4	25.7	12.7	-0.8062	-0.611084	-1.31707																				9.3	3.7	0.195116	0.51087
B. suecicus	46.25	102	19.3	24.8	13.7	-1.48158	-0.804817	-2.21199																				5.5	5.6	0.676764	0.730405
Santonian
DSDP 511	-57	19							29.8011	37.12	27.71																					7.31895	2.09105
Aderet borehole 1	12	3							32.5424	33.2265	31.8775																					0.684159	0.66484
West Kansas	43	16																-3.09616	-1.68147	-4.19364																		1.41469	1.09748
Alabama	33	17																-1.19908	-0.323	-2.07907																		0.876084	0.879982
Coniacian
DSDP 511	-56.5	12							28.5058	32.06	22.34																					3.55417	6.16583
ODP 1259	4	9							35.3469	36.1231	34.1197																					0.776187	1.22721
Turonian
DSDP 511	-56.5	5							29.738	32.85	22.41																					3.112	7.328
ODP 1135	-61.5	3							30.9733	33.03	29.68																					2.05667	1.29333
ODP 1138	-55	13							34.37	35.31	33.08																					0.94	1.29
ODP 1258+ ODP 1259+ ODP 1260	4	113							36.3613	37.3874	34.1197																					1.02603	2.24163
ODP 1276+Bass River	36	31							36.2536	37.3564	35.2382																					1.10283	1.01532
Wunstrof	43.5	13							36.8012	37.3021	36.1479																					0.500849	0.653347
Cenomanian
DSDP 367	5.5	26							35.6794	37.2744	34.1197																					1.59502	1.55968
DSDP 1258+DSDP 1260	4.5	72							35.1191	37.0763	32.7049																					1.95719	2.41424
DSDP 1276+Bass River	36	94							35.5917	37.48	29.7756																					1.88832	5.81608
Wunstrof	43.5	15							35.956	37.5219	32.0314																					1.56591	3.92468
Albian
ODP 1049	32	5							34.7546	36.498	33.7723																					1.7434	0.982358
ODP1258	5.5	8							34.8002	35.1383	34.1197																					0.33807	0.680512
DSDP 545	27	80							30.338	33.8724	28.8391																					3.53445	1.49891
ODP 693	-60	7							26.6216	28.0047	24.8749																					1.38307	1.74674
Aptian
DSDP 511	-48.5	15+4							27.9656	29.2513	26.2568	22.9744	24.9457	21.2654	-0.433084	0.339535	-0.947727															1.28569	1.70878	1.9713	1.709	0.772619	0.514643
ODP 693	-60	4							26.0266	26.7035	25.3427																					0.67694	0.683866
DSDP 545	27	94							30.173	32.5115	26.9175																					2.33851	3.25551
Alstätte 1 section	41	4							31.497	31.9714	30.4476																					0.474342	1.04936
Cismon	24.5	8							25.009	26.6529	22.4712																					1.64389	2.5378
DSDP 398	33	27							35.5048	37.0763	33.7723																					1.57145	1.73259
Barremian
DSDP 511	-50	7+1							28.4795	29.2513	27.1436	23.9458	27.7943	20.0973	-1.69955	-0.942083	-2.45706															0.771828	1.33585	3.8485	3.8485	0.757469	0.757511
ODP 1207	-2.5	41							35.0168	37.3217	31.4189																					2.30489	3.59794
Alstätte 1 section	37	8							30.6274	32.7049	27.1436																					2.07749	3.48377
A39 section	34.5	24							29.5635	34.4631	26.2568																					4.89964	3.30667
Gött Section	37.5	3							29.7795	30.836	29.2513																					1.05645	0.528227
DSDP 463	-17	4							32.4603	33.5499	31.6883																					1.08962	0.772044
Hauterivian
DSDP 603	29	4							35.5752	35.818	35.1635																					0.242802	0.411671
DSDP 534	23.5	9							35.9906	36.3382	35.4428																					0.347607	0.547723
ODP 766	-50	6							26.1188	27.5605	25.4247																					1.4417	0.694143
ODP 692	-52	10							27.4075	29.2177	26.1933																					1.81024	1.21417
A39 section	34.5	6							26.9821	28.8415	25.8033																					1.85948	1.17879
Gott section+mooberg	37.5	28							27.269	29.6554	23.9166																					2.38649	3.3524
Valanginian
Boyarka	74	5										19.3137	21.4244	16.9724	-1.27672	0.0421876	-2.85683																	2.11075	2.34131	1.31891	1.58011
Caravaca	24	5										27.3121	31.9166	24.2445	0.84699	2.28124	0.115855																	4.60452	3.06764	1.43425	0.731135
Izhma	59	4										19.292	25.363	10.2485	0.0903159	1.73302	-2.14238																	6.07092	9.04359	1.64271	2.23269
Speeton	40	4+6							23.1633	24.3996	21.9018	24.0548	28.0322	17.5266	0.15382	1.48751	-1.41309															1.23628	1.26147	3.97747	6.52816	1.33369	1.56691
DSDP 603	27.5	14							35.5511	36.1696	34.4412																					0.618514	1.10997
DSDP 534	23.5	26							36.1856	36.7736	35.5658																					0.587993	0.619772
ODP 766	-50	13							26.0916	28.4382	24.9783																					2.34661	1.11331
ODP 692	-52	38							28.3278	30.6469	24.7694																					2.31905	3.55845
Mooberg	37.5	4							24.9882	25.8033	24.3996																					0.815111	0.588572
Tithonian
Solhofen	34	1																0.0746
Chassiron	30	2																0.4225	0.5716	0.2734																		0.1491	0.1491
Kimmeridgian
DSDP 511	-52	33+5							28.7079	30.45	27.14	25.9107	27.5497	24.3587	-0.414404	0.295985	-0.877654															1.74212	1.56788	1.63905	1.55199	0.710389	0.46325
Herbides Basin	40	2										22.3577	23.3262	21.3893	-1.08393	-1.0585	-1.10936																	0.968472	0.968472	0.0254292	0.0254292
Tarkh Pr.	48.5	5										16.2294	18.1105	13.1669	-2.53749	-1.99726	-3.27573																	1.88116	3.06248	0.54023	0.73824
Mikhalen	50.5	3										14.7333	16.7977	13.6666	-2.32184	-2.0474	-2.53665																	2.0644	1.06671	0.274448	0.214806
Oxfordian
Herbides Basin	40	12										26.4709	31.9256	18.7032	0.828158	2.64241	-1.72227																	5.45473	7.76767	1.81425	2.55043
Mikhalen	50.5	3										18.1998	22.3066	15.9966	-0.439123	0.390058	-1.03465																	4.10686	2.20316	0.829181	0.595526
Makar'ev	50	2+3	11.2828	14.2898	8.27583	-3.50682	-2.96397	-4.04967				14.8926	21.0533	10.0159	0.251341	1.50897	-0.777207											3.00697	3.00697	0.54285	0.54285			6.16078	4.87664	1.25763	1.02855
Dubiki	45.5	1+4	13.8713	16.2808	11.4619	-0.0803845						17.8211	19.5164	16.1591	0.515212	1.0435	0.0216614											2.40947	2.40947					1.69532	1.66205	0.528292	0.493551
Callovian
Dubiki	45.5	1+2	13.3297	16.257	10.4024	-1.09518						16.5287	18.2661	14.7913	0.811833	1.04253	0.581131											2.92732	2.92732					1.73741	1.73741	0.230701	0.230701
DSDP 511	-52	2+1							26.02	26.7	25.34	27.766	32.0193	23.5126	0.33276	1.1505	-0.484984															0.68	0.68	4.25336	4.25336
Herbides Basin	40	3										24.227	26.7124	22.5686	0.443509	0.852563	0.235789																	2.48537	1.65839	0.409053	0.20772
Christian manford	34	11+5	23.2279	26.6537	19.8757	-1.14347	1.1054	-1.92792				26.4287	29.5476	22.1694	0.222902	0.851995	-0.478034											3.42577	3.35223	2.24887	0.784446			3.11896	4.25925	0.629093	0.700936
Bajocian
EST 210	31.5	1	27	30	24	1.32052																						3	3
Toarcian
Aubach	39	12										43.616	53.5416	35.294	2.575	3.91585	1.48861																	9.9255	8.32205	1.34085	1.08639
La Cerradura	20	16							27.7069	32.2	21.3																					4.49313	6.40687
Valdorbia	15	11							27.3	32.8	22.5																					5.5	4.8
Pliensbachian
Aubach	39	10										37.4026	46.5689	30.1074	2.17691	3.59298	1.20465																	9.16631	7.29522	1.41607	0.972257
Valdorbia	15	9							27.4556	30.2	25.6																					2.74444	1.85556
DSDP 547	28	3							32	33	31.4																					1	0.6
Sinémurian
DSDP 547	28	6							33.5	34.9	31.6																					1.4	1.9

## Sheet: Interval Mean
			Bivalve, ammonite or Foram D47 T (°C)			Bivalve, ammonite or Foram 18Osw (‰VSMOW)			Tex 86 H (°C)			Belemnites D47 T (°C)			Belemnites 18Osw (‰VSMOW)			Marine reptiles 18Osw (‰VSMOW)
Location	Paleolatitude	number of data	Mean	Max-Mean	Mean-Min	Mean	Max-Mean	Mean-Min	Mean	Max-Mean	Mean-Min	Mean	Max-Mean	Mean-Min	Mean	Max-Mean	Mean-Min	Mean	Max-Mean	Mean-Min
Eocene
Tanzania Drilling project	-20	1	29.7	3.2	3.1	-0.130796
Nangulan, Java	-6	2	35.65	0.65	0.65	-0.771212
Hampshire basin, UK	45	1	23.2	5.2	5	-4.11058
Belgium	45	4	26.65	4.45	6.65	-1.71706	1.41789	0.932117
Isle of Wight, UK	44	1	30.4	4.2	4	-1.77154
Paris Basin, Fr	43	1	18.5	5.6	5.4	-4.11887
Kutch, India	5	3	32.8667	2.23333	2.46667	-1.11558	0.498883	0.535962
Seymour Island	-70	24	13.7	7.3	4.5	-1.14453	1.58099	2.21596	20.1944	6.20556	6.39444
Hatchtigbee	29	10+6	26.47	4.93	5.67	-1.66347	1.69194	2.18045	29.609	1.18492	2.00011
West Siberian Sea	51	31							23.4742	4.32581	4.47419
ODP 1172	-57.5	37							28.7681	3.30715	4.2088
Waipara River	-47	7							31.2939	0.905266	1.28522
ACEX 302-4A	78	38							20.7195	3.33914	6.87829
ODP 959	-7	104							32.1046	5.5036	4.9671
ODP 929+925	-2	30							30.2059	3.68856	3.55524
Dahomey Basin	-7.5	22							34.2322	2.7222	1.8481
Paleocene
Moscow landing	33	4	16.7021	1.49155	1.6843	-0.872915	0.513076	0.791573
Seymour Island	-64	4	4.12027	3.75683	3.45993	-2.81032	0.557199	0.810006
West Siberian Sea	50	8							18.275	3.225	1.475
Bass River+Wilson Lake	35.5	31							29.3768	1.59344	3.19983
ODP 959	-10	21							33.5778	3.97044	2.40256
Dahomey Basin	-7.5	17							33.2624	1.15472	2.67248
Latest Cretaceous (Campanian-Maastrichtian)
Burches Ferry+Cusseta	33	8+3	14.2601	3.98897	4.70244	-1.83572	1.99332	1.09057				15.3398	5.49475	5.01582	-1.38073	1.1063	0.745388
Marengo county+Moscow Landing+Demopolis	34	21	17.0476	10.1285	10.4476	-1.04087	2.70621	2.80907
Coon Creek+owl creek	36.5	6	15.3459	3.83587	5.04452	-2.08208	1.0703	1.51834
New Jersey	37.5	4	6.73681	6.90749	3.83804	-2.81393	2.23853	1.48114
Colorado springs	43	3	12.3723	3.45499	2.28713	-2.62461	0.69144	0.593472
Elbert	43.5	2	6.45726	1.28056	1.28056	-7.41155	0.415425	0.415425
Corson	49	5	6.56086	1.20401	0.913271	-5.3106	1.17032	1.46409
Emmons+Shell Buttes+Eastern Sioux+Dewey	49.5	5	10.1885	3.26221	5.32459	-3.9635	1.49685	1.98908
Sandoval	40	1	20.6715	3.75839	3.75839	-1.27799
Seymour island	-64.5	48	8.1062	6.93229	10.8971	-1.8636	2.38745	2.18943
Wyoming	47	2																-4.53259	0.03479	0.03479
Belgium	40	2																-1.12234	0.327192	0.327192
DSDP 511	-57.5	41							27.5763	2.99366	7.84634
FL-533	74.5	4							18.5922	0.780644	1.50977
Shuqualak	34.5	38							32.0718	3.46434	3.75066
Aderet 1+PAMA Quarry	12.5	90							28.2607	4.96582	5.2225
Brazos River	35	7							30.2174	0.752517	0.245148
Meirs farm	37.5	6							25.9271	2.3431	1.86036
Kristinstad basin	de Winter et al., 2021		MA	WM-MA	MA-CM	MA	WM-MA	MA-CM
R. diluvianum	46.25	121	24.6	4.6	5	0.3	0.53	0.6
A. incurve	46.25	115	16.4	9.3	3.7	-0.81	0.2	0.51
B. suecicus	46.25	102	19.3	5.5	5.6	-1.48	0.68	0.73
Early late Cretaceous (Cenomanian-Santonian)
West Kansas	43	16																-3.09616	1.41469	1.09748
Alabama	33.5	17																-1.19908	0.876084	0.879982
DSDP 511	-57	36							29.3606	7.75944	7.02056
ODP 1135	-62	3							30.9733	2.05667	1.29333
ODP 1138	-55	13							34.37	0.94	1.29
DSDP 367	6.5	26							35.6794	1.59502	1.55968
ODP 1258+1259+1260	4.5	194							35.8532	1.53412	3.14837
ODP 1276	36	50							35.5323	1.9477	5.75671
Brass River	36	75							35.9049	1.08602	2.46446
Wünstroff	43.5	28							36.3484	1.17351	4.31709
Early Cretaceous
Boyarka	74	5										19.3137	2.11075	2.34131	-1.27672	1.31891	1.58011
Izhma	59	4										19.292	6.07092	9.04359	0.0903159	1.64271	2.23269
Speeton	40	4+6							23.1633	1.23628	1.26147	24.0548	3.97747	6.52816	0.15382	1.33369	1.56691
Caravaca	24	5										27.3121	4.60452	3.06764	0.84699	1.43425	0.731135
DSDP 511	-50	22+5							28.1291	1.12219	1.87229	23.1687	1.777	1.90329	-0.686377	1.02591	1.01317
ODP 1049	32	5							34.7546	1.7434	0.982358
DSDP 603	28	18							35.5565	0.613175	1.11531
DSDP 463	-17	4							32.4603	1.08962	0.772044
DSDP 534	23	35							36.1354	0.638138	0.692586
ODP 766	-50	19							26.1002	2.33801	1.1219
DSDP 249	-51	6							23.6403	3.12718	1.18673
ODP 692	-52	60							28.2256	2.4213	3.4562
ODP 693	-60	11							26.4052	1.59946	1.53035
ODP 1207	-2.5	41							35.0168	2.30489	3.59794
ODP 1258	5.5	8							34.8002	0.33807	0.680512
DSDP 545	27	174							30.2489	3.62356	3.33135
Alstätte 1	38	12							30.9173	1.78761	3.77365
A39 section	34.5	30							29.0472	5.41593	3.24392
Gott+Mooberg	37	35							27.2235	3.61248	3.30693
Cismon	25	8							25.009	1.64389	2.5378
DSDP 398	33	27							35.5048	1.57145	1.73259
Late Jurassic
Mihhalen+Makar'ev	50	2+9	11.2828	3.00697	3.00697	-3.50682	0.54285	0.54285				15.9419	6.36475	5.92595	-0.836542	2.34551	1.70011
Tarkh	49	5										16.2294	1.88116	3.06248	-2.53749	0.54023	0.73824
Dubiki	45.5	1+4	13.8713	2.40947	2.40947	-0.0803845						17.8211	1.69532	1.66205	0.515212	0.528292	0.493551
Herbides Basin	40	14										25.8833	6.04232	7.18009	0.555003	2.0874	2.27727
DSDP 511	-52	33+5							28.7079	1.74212	1.56788	25.9107	1.63905	1.55199	-0.414404	0.710389	0.46325
Chassiron	30	2																0.4225	0.1491	0.1491
Solnhofen	34	1																0.0746	0.2	0.2
Middle Jurassic
Dubiki	45.5	1+2	13.3297	2.92732	2.92732	-1.09518						16.5287	1.73741	1.73741	0.811833	0.230701	0.230701
Herbides Basin	40	3										24.227	2.48537	1.65839	0.443509	0.409053	0.20772
DSDP 511	-52	2+1							26.02	0.68	0.68	27.766	4.25336	4.25336	0.33276	0.817744	0.817744
Christian manford	34	11+5	23.2279	3.42577	3.35223	-1.14347	2.24887	0.784446				26.4287	3.11896	4.25925	0.222902	0.629093	0.700936
Early Jurassic
Hole 547	28	9							33	1.9	1.6
La Cerradura	20	16							27.7069	4.49313	6.40687
Valdorbia	15	20							27.37	5.43	4.87
